# Supplementary material for: Sensitivity and Specificity of a Novel Classifier for the Early Diagnosis of Dengue
Source: PLoS Negl Trop Dis. 2015 Apr 2;9(4):e0003638. doi: 10.1371/journal.pntd.0003638 (PMC4383489; doi:10.1371/journal.pntd.0003638)
Supplement: S1 Dataset — Clinical and laboratory results (line listings) by individual patient, plus data dictionary. (XLS) [file pntd.0003638.s009.xls]

## Sheet: diagnosis
DateEnrol	SiteNo	StudyNo	Sex	Age	DayDisease	Vomiting	Abdo	Muco	Skin	Temp	BMI	Height	Weight	Flush	Hepatomegaly	Rash	Injection	WBC	HCT	PLT	NEUCount	LYMCount	MONOCount	ALB	AST	ALT	CK	Lab_Confirmed_Dengue	Serotype	NS1_PLATELIA	NS1_TRIP	SeroConversion	Serology	Pairedsample
10/19/10 12:00 AM	1	1-0001	1	11	3	1	1	2	2	36.8	16.3966	144	34	FALSE	FALSE	FALSE	FALSE	5.37	37.8	110	3.52	1.51	0.31	41.7	147	69	155	1	2	1	1	1	2	1
10/19/10 12:00 AM	1	1-0002	1	1	2	2	2	2	2	39.7	20.545	68	9.5	TRUE	FALSE	FALSE	FALSE	12.82	34.3	178	6.26	5.07	1.28	41.8	48	14	115	2	<LOD	2	2	2	0	0
10/19/10 12:00 AM	1	1-0003	1	3	1	2	1	2	2	38.6	14.8148	90	12	FALSE	FALSE	FALSE	FALSE	11.91	36	323	8	3.22	0.68	45.9	34	16	60	2	<LOD	2	2	2	0	0
10/20/10 12:00 AM	1	1-0004	1	4	2	2	2	2	2	36.5	16.5289	110	20	TRUE	FALSE	TRUE	FALSE	9.77	38.2	246	5.28	3.28	1.17	48.5	34	17	96	2	<LOD	2	2	2	0	0
10/20/10 12:00 AM	1	1-0005	1	1	1	2	2	2	1	39.1	16.9753	72	8.8	FALSE	FALSE	FALSE	FALSE	13.94	31.7	303	9.86	3.22	0.84	44.2	51	18	297	2	<LOD	2	2	2	0	2
10/20/10 12:00 AM	1	1-0006	2	9	2	1	2	2	2	38.2	18.8455	142	38	FALSE	FALSE	FALSE	FALSE	3.97	38.5	224	2.52	0.9	0.54	45.6	39	19	93	1	2	1	1	2	0	0
10/20/10 12:00 AM	1	1-0007	2	3	1	1	1	2	2	37	12.8544	115	17	FALSE	FALSE	FALSE	FALSE	8.23	38.7	358	6.01	1.55	0.63	45.6	36	22	86	1	1	1	1	2	0	0
10/20/10 12:00 AM	1	1-0008	1	2	1	2	2	2	2	38.3	14.1969	86	10.5	TRUE	FALSE	FALSE	FALSE	7.71	32.4	514	4.86	1.76	1.07	38.8	51	22	62	2	<LOD	2	2	2	0	0
10/20/10 12:00 AM	1	1-0009	1	13	1	2	1	2	2	37.5	15.8221	157	39	TRUE	FALSE	FALSE	FALSE	7.67	40.6	217	4.75	1.91	0.98	43.7	25	10	127	2	<LOD	2	2	2	0	2
10/21/10 12:00 AM	1	1-0010	1	1	3	2	2	2	2	38	19.0625	80	12.2	TRUE	FALSE	FALSE	TRUE	9.4	35.6	163	3.64	4.84	0.91	43.5	43	12	114	2	<LOD	2	2	2	0	0
10/21/10 12:00 AM	1	1-0011	2	9	2	2	2	2	2	38.4	19.6376	131	33.7	FALSE	FALSE	FALSE	FALSE	6.54	39	269	4.83	1.18	0.51	43.7	23	10	52	2	<LOD	3	2	2	0	0
10/22/10 12:00 AM	1	1-0012	2	9	2	1	2	2	1	36.6	14.2661	135	26	FALSE	FALSE	FALSE	FALSE	4.05	38.3	195	1.56	2.19	0.29	41.6	43	13	142	1	2	3	2	2	0	0
10/25/10 12:00 AM	1	1-0013	1	1	3	2	2	2	2	37.7	17.1875	80	11	FALSE	FALSE	FALSE	FALSE	8.96	36.1	153	1.77	6.6	0.58	46.5	83	23	198	2	<LOD	2	2	2	0	0
10/25/10 12:00 AM	1	1-0014	2	5	3	2	2	2	2	37.7	13.4564	102	14	TRUE	FALSE	FALSE	FALSE	6.54	37.8	206	4.34	1.91	0.29	43.9	66	14	113	2	<LOD	3	2	2	0	0
10/25/10 12:00 AM	1	1-0015	1	11	3	2	2	2	1	39.3	19.4771	152	45	TRUE	FALSE	FALSE	TRUE	2.13	36	118	1.25	0.78	0.1	40.3	69	33	95	1	1	1	1	2	0	0
10/25/10 12:00 AM	1	1-0016	1	8	1	2	2	1	1	38.4	12.9273	118	18	TRUE	FALSE	FALSE	FALSE	5.42	37.2	220	3.38	1.49	0.55	43	46	19	78	2	<LOD	2	2	2	0	2
10/27/10 12:00 AM	1	1-0017	1	10	1	2	2	2	2	36.7	16.6209	149	36.9	TRUE	FALSE	FALSE	FALSE	7.46	40.2	224	5.44	1.35	0.55	45.3	35	14	147	2	<LOD	2	2	2	0	0
10/27/10 12:00 AM	1	1-0018	2	5	1	2	2	2	2	37.5	13.9274	114	18.1	FALSE	FALSE	FALSE	FALSE	5.51	40.2	213	3.69	1.08	0.59	44.8	33	14	118	2	<LOD	2	2	2	0	2
10/27/10 12:00 AM	1	1-0019	1	3	2	2	2	2	2	39.1	19.2234	102	20	TRUE	FALSE	FALSE	TRUE	9.47	36.7	246	6.66	1.43	1.34	47	42	18	111	2	<LOD	2	2	2	0	0
10/27/10 12:00 AM	1	1-0020	2	10	2	2	2	2	2	37	22.9251	145	48.2	FALSE	FALSE	FALSE	FALSE	8.48	35.7	206	5.76	2.1	0.48	44.1	24	12	104	2	<LOD	2	2	2	0	0
10/27/10 12:00 AM	1	1-0021	2	3	1	2	2	2	2	38.7	16.8269	104	18.2	FALSE	FALSE	FALSE	FALSE	8.37	36.2	333	6.28	1.2	0.84	47.1	76	42	91	1	2	2	2	1	2	1
10/27/10 12:00 AM	1	1-0022	2	1	3	2	2	2	2	35.8	15.625	80	10	FALSE	FALSE	FALSE	FALSE	17.58	28.8	418	3.95	11.12	2.19	42.6	38	16	152	2	<LOD	2	2	2	0	0
10/27/10 12:00 AM	1	1-0023	1	3	2	2	2	2	2	37.7	18.9197	101	19.3	TRUE	FALSE	FALSE	FALSE	12.07	39.2	295	5.39	4.88	1.78					2	<LOD	2	2	2	0	0
10/28/10 12:00 AM	1	1-0024	2	3	2	2	2	2	2	38	15.9422	97	15	TRUE	FALSE	FALSE	FALSE	8.06	39.8	175	2.01	4.53	1.49	41.2	39	17	75	2	<LOD	2	2	2	0	0
10/28/10 12:00 AM	1	1-0025	2	2	1	2	2	2	2	37.7	14.881	84	10.5	FALSE	FALSE	FALSE	FALSE	8.43	39.3	179	2.04	4.78	1.58					1	1	1	1	2	0	0
10/28/10 12:00 AM	1	1-0026	2	2	2	2	2	2	2	38.3	14.0595	92	11.9	FALSE	FALSE	FALSE	TRUE	11.67	35.3	233	5.6	3.67	2.36	40.5	44	16	112	1	1	1	2	2	0	0
10/28/10 12:00 AM	1	1-0027	2	1	1	2	2	2	1	38.8	18.6981	76	10.8	FALSE	FALSE	FALSE	FALSE	17.1	35.6	333	8.79	6.08	2.09	48.8	45	18	159	2	<LOD	2	2	2	0	0
10/28/10 12:00 AM	1	1-0028	1	10	1	2	2	2	2	37	18.641	138	35.5	FALSE	FALSE	FALSE	FALSE	5.45	42.5	258	3.76	0.89	0.66	47.4	48	27	98	1	1	2	2	2	0	0
10/28/10 12:00 AM	1	1-0029	1	12	1	1	2	2	2	38.4	23.2907	139	45	FALSE	FALSE	FALSE	FALSE	4.89	34.3	212	2.11	1.53	1.25	44.3	42	16	96	1	2	1	1	2	0	0
10/29/10 12:00 AM	1	1-0030	2	3	2	1	2	2	1	36.9	13.536	98	13	FALSE	FALSE	FALSE	FALSE	7.34	35.2	265	3.49	3.16	0.69	46.4	44	20	71	1	1	2	2	1	1	2
10/29/10 12:00 AM	1	1-0031	2	1	1	2	2	2	1	38.1	17.5771	86	13	FALSE	FALSE	TRUE	FALSE	8.22	32.1	199	4.79	1.6	1.78	44.6	63	31	121	1	1	1	1	1	1	1
10/29/10 12:00 AM	1	1-0032	2	11	2	2	2	2	1	39.2	15.6976	143	32.1	FALSE	FALSE	FALSE	FALSE	2.82	38.1	102	1.52	0.83	0.45	43.9	54	22	137	1	1	1	1	1	1	1
2010-01-11	1	1-0033	1	1	2	2	2	2	2	37.7	13.493	77	8	FALSE	FALSE	FALSE	FALSE	14.99	33.2	249	6.1	6.74	2.12	42.5	74	23	141	2	<LOD	2	2	2	0	0
2010-01-11	1	1-0034	1	9	1	2	2	2	2	40.1	21.004	138	40	TRUE	FALSE	FALSE	TRUE	7.16	37.3	261	5.36	0.82	0.97	45.9	41	31	110	1	1	1	1	1	1	1
2010-02-11	1	1-0035	1	14	2	2	2	2	2	38.1	18.1068	164	48.7	FALSE	FALSE	FALSE	FALSE	3.97	43.4	130	2.13	1.24	0.58	44.9	36	6	115	1	1	1	1	2	0	0
2010-02-11	1	1-0036	2	4	2	2	2	2	2	38.5	16.0241	103	17	FALSE	FALSE	FALSE	FALSE	9.95	36.9	320	5.54	3.34	1.07	44.2	28.5	19.3	40	2	<LOD	2	2	2	0	0
2010-04-11	1	1-0037	2	7	3	2	2	2	2	36.7	13.4025	131	23	FALSE	FALSE	FALSE	FALSE	5.16	39	217	1.52	2.67	0.83	40.6	39	15	66	2	<LOD	2	2	2	0	0
2010-05-11	1	1-0038	2	1	2	2	2	2	2	37.7	21.3382	81	14	FALSE	FALSE	FALSE	FALSE	9.51	34.2	271	4.49	3.35	1.64	42.3	42	15	82	2	<LOD	2	2	2	0	0
2010-05-11	1	1-0039	1	13	2	1	2	2	2	37.3	22.4051	162	58.8	FALSE	FALSE	FALSE	FALSE	3.15	43.7	117	2.1	0.77	0.27	44.8	47	21	407	1	1	1	1	1	1	1
2010-05-11	1	1-0040	1	11	2	1	2	2	2	37	26.0899	144	54.1	FALSE	FALSE	FALSE	FALSE	6.31	37.9	160	4.34	1.11	0.85	45.2	39	26	90	1	1	1	1	1	2	1
2010-05-11	1	1-0041	2	8	2	1	2	2	2	39	16.96	125	26.5	FALSE	FALSE	FALSE	FALSE	5.18	34.8	158	3.72	0.71	0.75	44.6	91	55	53	1	3	1	1	2	0	0
2010-09-11	1	1-0042	2	3	1	2	2	2	2	36.4	16.225	86	12	TRUE	FALSE	FALSE	FALSE	9.38	33.9	333	4.88	3.58	0.9	45	41	14	58	2	<LOD	3	2	2	0	2
2010-09-11	1	1-0043	1	15	2	2	2	2	1	37.6	24.8591	169	71	TRUE	FALSE	FALSE	FALSE	2.69	39.2	118	1.9	0.48	0.31	46	38	28	182	1	2	1	1	2	0	0
2010-09-11	1	1-0044	1	3	1	1	1	2	2	37.4	12.2917	120	17.7	FALSE	FALSE	FALSE	FALSE	16.61	36.8	232	13.77	2.12	0.71	43.3	37	15	159	2	<LOD	2	2	2	0	0
2010-10-11	1	1-0045	2	1	1	2	2	2	2	37.7	16.7824	72	8.7	FALSE	FALSE	FALSE	FALSE	22.32	33.9	376	8.2	10.63	3.44	43.2	39	36	41	2	<LOD	2	2	2	0	0
2010-10-11	1	1-0046	1	3	1	2	2	2	2	37	20.6163	96	19	FALSE	FALSE	FALSE	FALSE	23.18	35	396	17.99	3.16	2	45.7	35	15	89	2	<LOD	3	2	2	0	0
2010-11-11	1	1-0048	2	2	2	2	2	2	2	37.5	16.6933	83	11.5	FALSE	FALSE	FALSE	FALSE	9.26	35.9	236	4.17	4.01	0.94	42.3	39	8	124	2	<LOD	2	2	2	0	0
2010-11-11	1	1-0049	2	3	2	2	2	2	2	37.6	17	100	17	FALSE	FALSE	FALSE	FALSE	7.72	36.2	232	5.51	1.19	1.01	44.8	118	97	54	1	3	1	1	1	2	1
2010-11-11	1	1-0050	1	5	2	2	2	2	1	37.5	15.3046	99	15	FALSE	FALSE	FALSE	FALSE	9.1	36.7	179	4.76	3.01	1.31	44.2	33	16	43	2	<LOD	2	2	2	0	0
2010-12-11	1	1-0051	2	3	2	1	2	2	2	37.7	20.8912	91	17.3	FALSE	FALSE	FALSE	FALSE	8.76	35.6	158	6.53	1.25	0.97	47.2	85	56	158	1	1	1	1	1	2	1
2010-12-11	1	1-0052	1	2	2	2	2	2	2	37.6	12.9132	88	10	FALSE	FALSE	FALSE	FALSE	13.1	33.7	202	8.37	2.66	1.91	39.6	41	27	91	2	<LOD	2	2	2	0	0
2010-12-11	1	1-0053	1	4	2	1	2	2	2	36.4	17.4696	96	16.1	FALSE	FALSE	FALSE	FALSE	6.12	31.6	273	2.53	2.6	0.98	41	43	10	116	2	<LOD	2	2	2	0	0
11/15/10 12:00 AM	1	1-0054	1	6	2	2	2	2	2	38.3	20.2052	113	25.8	FALSE	FALSE	FALSE	FALSE	13.66	37.1	330	8.6	3.25	1.79	45.8	38	17	75	2	<LOD	3	2	2	0	0
11/15/10 12:00 AM	1	1-0055	2	2	2	2	2	2	1	38	14.8502	88	11.5	FALSE	FALSE	TRUE	FALSE	6.4	38	150	4.46	0.76	0.57	44.4	74	45	115	1	1	1	1	2	0	0
11/15/10 12:00 AM	1	1-0056	1	2	2	1	2	2	2	37.6	12.9962	92	11	FALSE	FALSE	TRUE	FALSE	10.4	35.6	350	4.59	4.68	0.89	43.6	39	19	72	2	<LOD	2	2	2	0	0
11/15/10 12:00 AM	1	1-0057	2	1	2	1	2	2	2	37.8	18.2023	73	9.7	FALSE	FALSE	FALSE	FALSE	13.62	36.8	405	6.82	5.23	1.44	40.5	49	17	207	2	<LOD	2	2	2	0	2
11/16/10 12:00 AM	1	1-0058	1	3	1	2	2	2	2	38.4	15.7541	88	12.2	FALSE	FALSE	FALSE	FALSE	8.8	30.4	296	2.56	3.37	2.81	41.6	31	13	59	2	<LOD	2	2	2	0	0
11/16/10 12:00 AM	1	1-0059	1	8	1	1	2	1	2	40.1	22.8956	133	40.5	TRUE	FALSE	FALSE	FALSE	5.21	32.7	163	4.04	0.46	0.7	38.1	72	44	60	1	1	1	1	2	0	0
11/16/10 12:00 AM	1	1-0060	2	11	2	1	1	2	1	37.5	23.0095	148	50.4	FALSE	FALSE	FALSE	FALSE	4.67	37.9	154	2.37	1.53	0.76	48.3	27	13	111	2	<LOD	3	2	2	0	0
11/16/10 12:00 AM	1	1-0061	2	3	1	1	1	2	1	36.5	16.3399	102	17	FALSE	FALSE	FALSE	FALSE	9.22	33.6	310	2.65	4.82	1.02	42.3	26	9	46	2	<LOD	2	2	2	0	0
11/17/10 12:00 AM	1	1-0062	1	7	3	1	1	2	2	37.5	18.6	127	30	FALSE	FALSE	FALSE	FALSE	6.87	41.6	287	4.03	2	0.82	41.5	42	13	67	2	<LOD	2	2	2	0	0
11/17/10 12:00 AM	1	1-0063	1	5	2	2	2	2	2	37.5	18.75	120	27	TRUE	FALSE	TRUE	FALSE	3.58	33.8	144	1.25	1.73	0.5	47.3	45	25	129	2	<LOD	2	2	2	0	0
11/17/10 12:00 AM	1	1-0064	1	7	3	2	2	2	2	37.6	15.1169	122	22.5	FALSE	FALSE	FALSE	FALSE	4.1	34.2	199	1.95	1.38	0.72	43.1	54	20	66	1	1	1	1	1	1	1
11/17/10 12:00 AM	1	1-0065	2	2	2	2	2	2	2	39	12.9132	88	10	FALSE	FALSE	FALSE	FALSE	20.48	31.1	345	15.96	3.05	1.45	44.9	37	18	50	2	<LOD	2	2	2	0	0
11/17/10 12:00 AM	1	1-0066	1	4	1	2	2	2	2	37.6	14.4175	102	15	FALSE	FALSE	FALSE	FALSE	18.2	28.4	256	12.92	3.94	1.08	44.4	29	9	110	2	<LOD	2	2	2	0	0
11/17/10 12:00 AM	1	1-0067	2	2	2	1	1	2	2	36.9	13.8408	85	10	FALSE	FALSE	FALSE	FALSE	10.16	35.4	265	5.51	3.67	0.7	40.5	62	20	51	2	<LOD	2	2	2	0	0
11/17/10 12:00 AM	1	1-0068	1	15	2	2	2	2	2	37.7	19.1571	174	58	FALSE	FALSE	FALSE	FALSE	3.47	40.8	139	2.67	0.35	0.45	46	32	20	46	1	1	1	1	1	1	1
11/18/10 12:00 AM	1	1-0069	2	4	1	1	1	2	2	37.7	13.9729	106	15.7	FALSE	FALSE	FALSE	FALSE	8.31	42.1	189	5.23	2.04	1.02	47.6	31	11	59	2	<LOD	2	2	2	0	0
11/18/10 12:00 AM	1	1-0070	1	7	1	2	2	2	2	37.5	20.189	115	26.7	FALSE	FALSE	FALSE	FALSE	5.98	37.6	252	3.29	1.46	1.22	47.7	49	22	152	1	2	2	2	2	0	0
11/18/10 12:00 AM	1	1-0071	2	11	2	2	2	2	1	38	16.197	147	35	TRUE	FALSE	FALSE	FALSE	4.7	39.8	196	2.81	1.32	0.47	45	25.1	11.3	258	1	2	3	2	2	0	0
11/18/10 12:00 AM	1	1-0072	2	6	2	2	2	2	2	37.5	18.3355	112	23	FALSE	FALSE	FALSE	FALSE	11.64	35.8	372	7.4	2.3	1.79	46.1	24.7	17.7	86	2	<LOD	2	2	2	0	0
11/18/10 12:00 AM	1	1-0073	1	1	2	2	2	2	2	37.6	15.4959	88	12	TRUE	FALSE	FALSE	FALSE	5.16	35	204	1.09	2.9	1.15	45.9	44.5	17.3	203	2	<LOD	2	2	2	0	0
11/19/10 12:00 AM	1	1-0074	2	8	1	1	2	2	2	37.7	16.7236	128	27.4	FALSE	FALSE	FALSE	FALSE	6.31	41.7	202	3.99	1.36	0.96	48.2	50	15	65	1	2	1	1	1	2	1
11/19/10 12:00 AM	1	1-0075	1	2	2	2	2	2	2	36.4	15.5896	84	11	FALSE	FALSE	FALSE	FALSE	6.49	32.9	203	2.13	3.12	1.2	43.7	144	127	267	2	<LOD	2	2	2	0	0
11/19/10 12:00 AM	1	1-0076	2	1	2	2	2	2	2	37.8	17.9688	80	11.5	FALSE	FALSE	FALSE	FALSE	7.13	35.2	183	1.42	4.86	0.82	45.5	56	16	107	2	<LOD	2	2	2	0	0
11/22/10 12:00 AM	1	1-0077	2	3	1	2	2	2	2	37.8	13.4669	109	16	FALSE	FALSE	FALSE	FALSE	25.34	37.1	292	16.06	6.49	2.75	45	44	16	121	2	<LOD	2	2	2	0	2
11/22/10 12:00 AM	1	1-0078	1	9	3	2	2	2	2	38	15.424	125	24.1	FALSE	FALSE	FALSE	FALSE	4.28	37.2	215	2.66	1.28	0.33	41.8	104	79	92	1	1	2	2	2	0	0
11/23/10 12:00 AM	1	1-0079	1	9	2	2	2	2	2	38.4	13.9828	124	21.5	FALSE	FALSE	FALSE	FALSE	5.89	41.4	234	3.92	1.38	0.57	47.7	37	14	53	2	<LOD	3	2	2	0	0
11/23/10 12:00 AM	1	1-0080	2	14	2	2	2	2	2	38.8	17.6693	156	43	FALSE	FALSE	FALSE	FALSE	3.71	38.6	137	2.56	0.65	0.5	44.5	30	11	107	1	4	1	1	2	0	0
11/23/10 12:00 AM	1	1-0081	2	1	1	2	2	2	2	39.1	17.8963	74	9.8	FALSE	FALSE	FALSE	FALSE	11.92	34.4	217	8.18	1.83	1.9	49.2	34	16	108	2	<LOD	2	2	2	0	0
11/24/10 12:00 AM	1	1-0082	2	8	1	2	2	2	2	38.7	18.9036	138	36	TRUE	FALSE	FALSE	FALSE	12.48	37	263	11.54	0.5	0.41	47.9	33	14	136	1	4	1	1	2	0	0
11/24/10 12:00 AM	1	1-0083	2	9	2	2	2	2	2	39.1	15.2588	128	25	TRUE	FALSE	FALSE	FALSE	5.49	40.3	245	3.33	1.76	0.4	49.8	45	24	464	2	<LOD	2	2	2	0	0
11/25/10 12:00 AM	1	1-0084	1	1	3	1	2	2	1	36.7	18.0802	78	11	FALSE	FALSE	FALSE	FALSE	11.13	38.5	315	4.8	5.23	1.08	45.2	53	19	163	2	<LOD	2	2	2	0	2
11/25/10 12:00 AM	1	1-0085	2	5	3	1	2	2	1	37.5	14.8527	111	18.3	FALSE	FALSE	FALSE	FALSE	5.2	36.9	219	1.7	2.99	0.49	41.1	39	14	65	2	<LOD	2	2	2	0	0
11/25/10 12:00 AM	1	1-0086	2	2	2	2	2	2	2	38.6	15.4959	88	12	FALSE	FALSE	FALSE	FALSE	28.38	33.3	395	22	4.32	1.45	37	30	29	13	2	<LOD	2	2	2	0	2
11/25/10 12:00 AM	1	1-0087	1	4	2	2	2	2	2	38	16.276	96	15	FALSE	FALSE	FALSE	TRUE	9.98	36.3	271	8.12	1.42	0.44	46.7	37	6	266	2	<LOD	2	2	2	0	0
11/25/10 12:00 AM	1	1-0088	1	8	3	2	2	2	2	37.7	20.48	125	32	FALSE	FALSE	FALSE	TRUE	4.33	37.6	151	2.41	1.43	0.47	43.5	41	20	143	1	1	1	1	1	2	1
11/26/10 12:00 AM	1	1-0089	1	3	2	2	2	2	2	37.5	17.9036	96	16.5	FALSE	FALSE	FALSE	FALSE	5.96	38.7	234	2.08	3.5	0.3	41	52	16	152	2	<LOD	2	2	2	0	0
11/26/10 12:00 AM	1	1-0090	2	6	1	1	2	2	1	39.1	21.1111	120	30.4	FALSE	FALSE	TRUE	FALSE	12.69	33	399	10.78	1.29	0.61	44.4	41	15	88	2	<LOD	2	2	2	0	2
2010-01-12	1	1-0091	2	3	1	2	2	2	2	37.6	13.9525	98	13.4	FALSE	FALSE	FALSE	FALSE	19.56	35.4	446	14.47	4.13	0.91	39.7	36	12	90	2	<LOD	2	2	2	0	0
2010-01-12	1	1-0092	2	7	2	2	1	2	2	38.4	16.0155	118	22.3	FALSE	FALSE	FALSE	FALSE	7.03	33.1	249	4.54	2.05	0.41	42.8	47	15	91	2	<LOD	2	2	2	0	0
2010-02-12	1	1-0093	2	2	2	2	2	2	2	36.6	15.467	82	10.4	FALSE	FALSE	FALSE	FALSE	19.19	32.5	309	9.13	8.8	1.16	40.8	36	12	78	2	<LOD	2	2	2	0	0
2010-02-12	1	1-0094	1	2	3	1	2	2	2	37.7	12.6418	92	10.7	TRUE	FALSE	FALSE	TRUE	4.78	34.3	187	2.85	1.44	0.37	41.8	51.4	26	47.5	2	<LOD	2	2	2	0	0
2010-03-12	1	1-0095	1	12	2	2	2	2	2	38	24.1672	164	65	FALSE	FALSE	FALSE	FALSE	10.94	40.2	237	9.2	0.77	0.96	44.4	30	16	180	2	<LOD	2	2	2	0	0
2010-03-12	1	1-0096	1	14	2	2	2	1	1	37.4	17.4191	166	48	FALSE	FALSE	FALSE	FALSE	2.47	41.8	169	1.05	1.02	0.32	44.5	25	14	74	1	2	2	2	2	0	0
2010-03-12	1	1-0097	2	7	1	1	2	2	2	37	14.7107	110	17.8	FALSE	FALSE	FALSE	FALSE	6.75	38.9	258	4.57	1.81	0.33	43.2	33	15	119	2	<LOD	2	2	2	0	0
2010-03-12	1	1-0098	1	1	2	2	2	2	2	37.6	15.928	76	9.2	FALSE	FALSE	FALSE	FALSE	15.16	37.1	262	6.37	7.36	1.09	42.7	43	22	103	2	<LOD	2	2	2	0	0
2010-03-12	1	1-0099	1	5	1	1	2	2	1	39.7	15.5846	118	21.7	FALSE	FALSE	FALSE	TRUE	12.08	32.6	146	10.47	0.92	0.67	42.6	31	11	93	1	3	1	1	1	1	1
2010-06-12	1	1-0100	1	3	2	1	2	2	2	37.6	14.8794	97	14	TRUE	FALSE	FALSE	FALSE	4.57	32.4	182	0.95	2.44	0.42	43.8	59	17	143	2	<LOD	2	2	2	0	0
2010-06-12	1	1-0101	2	4	2	1	1	2	2	37.6	15.4321	108	18	FALSE	TRUE	FALSE	TRUE	7.15	38.6	154	4.17	2.36	0.61	43.2	42	14	118	2	<LOD	2	2	2	0	0
2010-06-12	1	1-0102	1	4	3	1	2	2	2	37.5	13.8877	109	16.5	FALSE	TRUE	FALSE	FALSE	15.59	35	289	11.08	3.83	0.67	43.7	46	13	146	2	<LOD	2	2	2	0	0
2010-06-12	1	1-0103	1	11	2	2	2	2	2	39.2	19.9538	138	38	TRUE	FALSE	FALSE	TRUE	7.42	36.2	376	5.21	1.32	0.75	41.4	69	41	220	2	<LOD	2	2	2	0	0
2010-06-12	1	1-0104	2	2	2	2	2	2	2	37.9	18.6851	85	13.5	FALSE	FALSE	FALSE	FALSE	6.37	28.7	353	1.78	4.02	0.53	42.8	67	36	140	2	<LOD	2	2	2	0	0
2010-06-12	1	1-0105	2	7	2	2	2	2	2	37.6	16.8367	140	33	FALSE	FALSE	FALSE	FALSE	5.3	36.1	158	3.08	1.55	0.65	48.9	35	16	126	1	2	3	2	2	0	0
2010-07-12	1	1-0106	1	4	1	2	2	2	1	37.6	16.6597	98	16	TRUE	FALSE	FALSE	TRUE	2.17	37.2	86	0.8	1.17	0.16	41.7	130	58	757	1	3	1	1	2	0	0
2010-07-12	1	1-0107	2	10	2	2	2	2	2	38.4	16.2197	136	30	TRUE	FALSE	FALSE	TRUE	5.43	38.3	232	3.84	0.94	0.65	44.8	38	13	138	1	1	1	1	2	0	0
2010-07-12	1	1-0108	2	1	3	1	2	2	2	38.2	16.4062	80	10.5	TRUE	FALSE	FALSE	TRUE	8.64	31.9	199	5.31	3.08	0.24	38.9	38	21	67	2	<LOD	2	2	2	0	2
2010-07-12	1	1-0109	2	2	3	1	2	2	2	37.5	18.7422	98	18	TRUE	FALSE	FALSE	TRUE	7.77	38.9	198	2.49	4.22	0.49	45.1	36	16	210	2	<LOD	2	2	2	0	0
2010-08-12	1	1-0110	2	2	1	2	2	1	2	38.3	13.2852	97	12.5	TRUE	FALSE	FALSE	FALSE	13.14	39	235	7.11	4.85	1.04	46.6	60	15	221	2	<LOD	2	2	2	0	0
2010-08-12	1	1-0111	2	3	2	2	1	2	2	37.5	17.5069	95	15.8	TRUE	FALSE	FALSE	FALSE	8.84	39	228	3.96	4.16	0.47	41.4	46	14	111	2	<LOD	2	2	2	0	0
2010-08-12	1	1-0112	2	5	2	2	2	2	2	37.5	15.4321	108	18	TRUE	FALSE	FALSE	FALSE	4.96	36.4	137	1.98	2.59	0.33	41.3	44	12	181	2	<LOD	2	2	2	0	0
2010-08-12	1	1-0113	1	2	3	2	2	2	2	37.5	18.7242	88	14.5	TRUE	FALSE	FALSE	FALSE	4.01	33.8	205	1.13	2.51	0.36	39.4	67	24	136	1	1	1	1	2	0	0
2010-10-12	1	1-0114	2	3	1	2	2	2	2	38.8	13.264	99	13	FALSE	FALSE	FALSE	FALSE	10.9	33.6	463	8.27	1.72	0.8	42.8	46	17	76	2	<LOD	2	2	2	0	0
2010-10-12	1	1-0115	1	13	2	2	2	2	1	37.6	14.6667	150	33	TRUE	FALSE	TRUE	TRUE	1.77	35.5	93	0.88	0.67	0.22	40.5	52	22	103	1	3	1	1	1	2	1
12/13/10 12:00 AM	1	1-0116	1	6	2	2	2	2	1	37.5	17.92	125	28	TRUE	FALSE	TRUE	FALSE	3.6	36.1	298	1.99	1.43	0.16	41.9	51	38	246	1	1	1	1	2	0	0
12/15/10 12:00 AM	1	1-0117	2	3	2	2	1	2	2	37.6	14.7994	93	12.8	FALSE	FALSE	TRUE	FALSE	18.66	38.1	439	12.59	4.55	0.98	39.7	45	17	134	2	<LOD	2	2	2	0	0
12/15/10 12:00 AM	1	1-0118	2	7	1	2	2	2	1	37.5	15.9439	112	20	FALSE	FALSE	FALSE	FALSE	9.03	35.1	319	6.06	2.35	0.52	43.1	39	12	256	2	<LOD	2	2	2	0	0
12/16/10 12:00 AM	1	1-0119	1	7	2	2	2	1	1	37.8	15.0819	118	21	FALSE	FALSE	FALSE	TRUE	3.08	37.6	193	1.3	1.47	0.27	40.9	154	197	112	1	1	1	1	2	0	0
12/17/10 12:00 AM	1	1-0120	1	5	2	1	1	2	2	37.5	16.5289	110	20	FALSE	FALSE	FALSE	FALSE	4.74	37.5	256	2.98	1.33	0.42	46.5	66	25	136	1	1	1	1	2	0	0
12/17/10 12:00 AM	1	1-0121	1	10	1	2	2	2	2	38.4	17.4268	129	29	FALSE	FALSE	FALSE	FALSE	4.79	34.5	210	3.97	0.61	0.19	43.3	34	10	133	1	1	1	1	2	0	0
12/22/10 12:00 AM	1	1-0122	2	8	2	2	2	2	2	38.1	15.2778	120	22	TRUE	FALSE	FALSE	FALSE	11.09	39.6	182	9.1	1.12	0.86	44.1	34	10	115	2	<LOD	2	2	2	0	0
12/22/10 12:00 AM	1	1-0123	1	11	2	2	2	2	1	37.5	21.004	138	40	TRUE	FALSE	FALSE	FALSE	3.08	39.8	163	1.54	1.15	0.37	45.3	43	45	41	1	1	1	1	2	0	0
12/27/10 12:00 AM	1	1-0124	2	1	3	1	2	2	2	37.7	20.3125	80	13	FALSE	FALSE	FALSE	FALSE	9.3	36.5	231	1.5	7.32	0.48	39.8	62	18	132	2	<LOD	2	2	2	0	0
12/28/10 12:00 AM	1	1-0125	2	4	2	1	2	2	2	37.7	17.301	102	18	FALSE	FALSE	FALSE	FALSE	6.88	36.5	201	3.07	3.23	0.56	42.2	53	16	109	1	2	2	2	2	0	0
12/28/10 12:00 AM	1	1-0126	2	1	2	1	2	2	2	37.7	17.313	76	10	FALSE	FALSE	FALSE	FALSE	9.29	31	171	5.08	3.47	0.62	44.9	76	50	54	2	<LOD	2	2	2	0	0
12/29/10 12:00 AM	1	1-0127	2	6	2	1	1	2	2	37.8	16.3496	116	22	FALSE	FALSE	FALSE	FALSE	13.19	39.4	286	7.74	4.47	0.92	42.1	42	25	107	2	<LOD	2	2	2	0	0
12/29/10 12:00 AM	1	1-0128	2	10	2	2	2	2	2	38.6	24.1047	132	42	TRUE	FALSE	FALSE	TRUE	6.08	36	101	3.54	1.71	0.82	39.6	54	52	61	1	1	1	1	1	2	1
12/29/10 12:00 AM	1	1-0129	1	11	2	2	2	2	2	37.8	27.4714	155	66	TRUE	FALSE	FALSE	TRUE	2.41	42.1	174	1.54	0.58	0.29	42.9	78	56	101	1	1	1	1	2	0	0
2011-10-01	1	1-0130	2	11	2	1	2	2	2	38	18.2615	148	40	TRUE	FALSE	FALSE	FALSE	5.55	41.3	252	3.67	1.21	0.66	43.2	33	17	151	2	<LOD	2	2	2	0	2
1/13/11 12:00 AM	1	1-0131	1	3	1	2	2	2	2	37.5	17.9931	85	13	FALSE	FALSE	FALSE	FALSE	18.21	32	401	11.22	4.6	2	41.4	37	14	72	2	<LOD	2	2	2	0	0
1/13/11 12:00 AM	1	1-0132	1	10	2	2	2	2	1	37.5	15.7093	121	23	FALSE	FALSE	FALSE	FALSE	6.22	34.3	68	1.68	3.57	0.82	39.6	111	34	773	1	2	2	2	2	0	0
1/14/11 12:00 AM	1	1-0133	2	9	1	2	2	2	2	37.5	16.9283	114	22	FALSE	FALSE	FALSE	FALSE	7.64	35.3	339	5.36	1.3	0.96	47.2	42	13	141	2	<LOD	2	2	2	0	0
1/17/11 12:00 AM	1	1-0134	1	6	2	2	2	2	2	38.9	14.1389	103	15	TRUE	FALSE	FALSE	FALSE	8.34	32.7	357	5.08	2.3	0.95	44.9	46	21	79	2	<LOD	2	2	2	0	0
2011-08-02	1	1-0135	1	3	2	2	2	2	2	40	18.9292	86	14	TRUE	FALSE	FALSE	FALSE	13.41	38.4	254	8.73	3.66	1.01	41.1	52	16	66	2	<LOD	2	2	2	0	0
2011-08-02	1	1-0136	2	10	3	1	2	2	2	37.8	14.9219	132	26	FALSE	FALSE	FALSE	FALSE	4.4	37.9	169	2.28	1.79	0.31	37.2	56	19	76	1	2	1	1	2	0	0
2011-08-02	1	1-0137	1	4	3	2	2	2	2	37.5	19.2395	94	17	FALSE	FALSE	FALSE	FALSE	5.92	38.6	289	2.34	3.04	0.53	46.2	54	28	83	2	<LOD	2	2	2	0	0
2011-08-02	1	1-0138	1	2	2	1	2	2	1	37.7	16.4062	80	10.5	FALSE	FALSE	FALSE	FALSE	8.18	35.4	187	3.17	3.96	1	43.5	51	8	166	2	<LOD	2	2	2	0	0
2011-08-02	1	1-0139	2	2	3	1	2	2	2	38	14.533	87	11	FALSE	FALSE	FALSE	FALSE	6.57	36.1	205	1.84	4.12	0.43	43.6	51	17	221	2	<LOD	2	2	2	0	0
2011-08-02	1	1-0140	1	4	2	2	2	2	2	39	12.4948	98	12	FALSE	FALSE	TRUE	FALSE	6.03	39.2	208	3	2.04	0.98	45.8	44	26	93	1	1	1	1	1	1	1
2011-08-02	1	1-0141	2	11	3	2	2	2	2	37.8	19.736	151	45	FALSE	FALSE	FALSE	FALSE	13.12	41.3	282	7.49	3.9	1.66	40.8	22	25	55	2	<LOD	2	2	2	0	0
2011-09-02	1	1-0142	2	2	2	2	2	2	2	37	12.6134	84	8.9	FALSE	FALSE	FALSE	FALSE	15.9	32.1	283	6.36	8.16	1.2	39	47	11	65	2	<LOD	2	2	2	0	0
2011-09-02	1	1-0143	1	8	1	2	1	2	2	37.6	13.64	127	22	FALSE	FALSE	FALSE	FALSE	7.81	34.2	303	6.96	0.42	0.39	43.5	27	9	101	2	<LOD	2	2	2	0	0
2011-09-02	1	1-0144	1	7	2	2	2	2	2	38	18.8964	126	30	FALSE	FALSE	FALSE	FALSE	21.41	39.3	313	16.8	3.44	0.66	45.6	40	15	129	2	<LOD	2	2	2	0	0
2011-09-02	1	1-0145	2	6	2	1	1	2	2	37.8	15.9439	112	20	FALSE	FALSE	FALSE	FALSE	21.34	38.6	320	16.7	3.42	0.67	41.5	21	10	25	2	<LOD	2	2	2	0	2
2011-09-02	1	1-0146	1	6	2	1	1	2	2	38.2	17.5383	112	22	FALSE	FALSE	FALSE	FALSE	15.43	34.6	212	12.6	2.02	0.79	39.4	36	12	105	2	<LOD	2	2	2	0	0
2011-09-02	1	1-0147	2	11	2	2	2	1	2	38.4	18.0737	145	38	TRUE	FALSE	FALSE	TRUE	5.18	40.3	173	3.76	0.92	0.5	41.5	30	15	65	1	1	1	1	2	0	0
2011-10-02	1	1-0148	2	11	2	1	2	2	2	37.7	16.8887	146	36	FALSE	FALSE	FALSE	FALSE	15.16	39.9	306	12.75	1.28	1.08	40	33	9	58	2	<LOD	2	2	2	0	0
2011-11-02	1	1-0149	1	3	1	2	1	2	2	37.8	17.701	98	17	FALSE	FALSE	FALSE	FALSE	13.85	39.3	301	9.55	3.75	0.51	46.7	56	14	147	2	<LOD	2	2	2	0	0
2011-11-02	1	1-0150	1	9	2	2	2	2	2	38	16.3241	124	25.1	FALSE	FALSE	FALSE	FALSE	12.69	40.7	196	10.11	1.84	0.72	43.1	29	11	70	2	<LOD	2	2	2	0	0
2011-11-02	1	1-0151	1	4	1	2	2	2	2	37.6	13.7976	111	17	FALSE	FALSE	FALSE	FALSE	15.66	37.8	286	7.78	6.33	1.41	44.4	43	22	95	2	<LOD	2	2	2	0	0
2011-11-02	1	1-0152	1	3	1	1	1	2	2	37.6	10.3635	112	13	FALSE	FALSE	FALSE	FALSE	9.45	36	286	7.84	1.35	0.23	46.6	34	12	70	2	<LOD	2	2	2	0	0
2011-11-02	1	1-0153	1	3	1	2	2	2	2	37.8	10.9418	109	13	FALSE	FALSE	FALSE	FALSE	25.19	36.5	475	14.54	8.91	1.68	42.5	40	11	96	2	<LOD	2	2	2	0	2
2011-11-02	1	1-0154	2	9	3	2	2	2	1	37.8	16.4609	135	30	FALSE	FALSE	FALSE	FALSE	2.22	37.7	139	1.35	0.71	0.15	43.8	44	16	116	1	3	1	1	2	0	0
2011-11-02	1	1-0155	2	14	3	2	2	2	1	37.5	19.0274	158	47.5	FALSE	FALSE	FALSE	FALSE	1.85	37.6	130	0.93	0.75	0.17	38.1	55	21	167	1	1	1	1	2	0	0
2/14/11 12:00 AM	1	1-0156	2	6	1	2	2	2	2	39.3	17.7686	110	21.5	FALSE	FALSE	FALSE	FALSE	18.54	36.8	304	14.41	2.59	1.37	45.2	45	20	131	2	<LOD	2	2	2	0	0
2/14/11 12:00 AM	1	1-0157	1	7	1	2	2	2	2	38	15.6805	130	26.5	FALSE	FALSE	FALSE	FALSE	19.06	33.3	330	13.07	4.16	1.8	43.5	41	16	147	2	<LOD	2	2	2	0	0
2/14/11 12:00 AM	1	1-0158	1	3	3	2	2	2	2	37.6	17.7221	92	15	FALSE	FALSE	FALSE	FALSE	13.12	32.6	259	5.4	6.83	0.81	44.7	37	7	67	2	<LOD	2	2	2	0	0
2/14/11 12:00 AM	1	1-0159	2	7	1	2	2	2	1	38.2	18.6728	118	26	FALSE	FALSE	FALSE	TRUE	15.97	34.6	305	12.95	1.99	1.02	47.2	53	29	119	2	<LOD	2	2	2	0	0
2/14/11 12:00 AM	1	1-0160	1	3	1	2	2	2	1	38.1	15.0979	98	14.5	FALSE	FALSE	FALSE	FALSE	13.74	33.3	234	7.07	5.39	1.24	42.9	52	12	126	2	<LOD	2	2	2	0	0
2/14/11 12:00 AM	1	1-0161	2	10	2	2	2	1	1	37.7	16.2197	136	30	FALSE	FALSE	FALSE	FALSE	4.19	32.4	183	2.33	1.39	0.45	42.8	83	50	155	1	1	1	1	1	2	1
2/14/11 12:00 AM	1	1-0162	1	3	2	2	2	2	2	38.8	14	100	14	FALSE	FALSE	FALSE	FALSE	7.99	32.3	259	4.46	2.99	0.52	41.6	50	15	120	2	<LOD	2	2	2	0	0
2/15/11 12:00 AM	1	1-0163	2	6	2	2	1	2	2	37.9	19.1327	112	24	TRUE	FALSE	FALSE	FALSE	6.84	36.9	302	3.59	2.84	0.41	44.4	33	17	60	2	<LOD	2	2	2	0	0
2/15/11 12:00 AM	1	1-0164	1	2	2	1	2	2	2	38.2	12.7538	99	12.5	FALSE	FALSE	FALSE	FALSE	11.42	30.9	154	5.16	4.31	1.81	42.8	51	20	262	2	<LOD	2	2	2	0	2
2/16/11 12:00 AM	1	1-0165	1	2	1	2	2	2	2	38	12.9132	88	10	FALSE	FALSE	FALSE	FALSE	4.85	32.3	244	2.37	2	0.48	43.2	67	16	87	2	<LOD	2	2	2	0	0
2/16/11 12:00 AM	1	1-0166	2	3	1	2	2	2	2	37.8	12.9758	102	13.5	FALSE	FALSE	FALSE	FALSE	15.15	36.3	312	9.98	3.79	1.36	41.4	42	11	98	2	<LOD	2	2	2	0	0
2/16/11 12:00 AM	1	1-0167	1	5	1	1	2	2	2	38	11.534	102	12	FALSE	FALSE	FALSE	FALSE	20.34	40.2	250	18.16	1.55	0.61	43.6	48	7	73	2	<LOD	2	2	2	0	0
2/16/11 12:00 AM	1	1-0168	2	3	1	2	2	2	2	38.4	13.0078	103	13.8	FALSE	FALSE	FALSE	FALSE	11.11	32.7	274	6.56	3.89	0.61	44.8	41	13	124	2	<LOD	2	2	2	0	2
2/16/11 12:00 AM	1	1-0169	2	10	2	1	2	2	1	38	14.9219	132	26	FALSE	FALSE	FALSE	FALSE	3.68	44.5	158	1.94	1.53	0.21	44.4	101	65	171	1	1	1	1	1	1	1
2/17/11 12:00 AM	1	1-0170	1	6	2	2	2	2	2	38	14.0966	113	18	TRUE	FALSE	FALSE	FALSE	9.48	33.7	245	5.71	3.3	0.38	39.4	43	13	129	2	<LOD	2	2	2	0	0
2/17/11 12:00 AM	1	1-0171	2	8	2	2	2	2	2	38.5	20.3951	131	35	TRUE	FALSE	FALSE	FALSE	7.22	40.8	185	3.95	2.44	0.73	43.2	43	20	147	2	<LOD	2	2	2	0	0
2/17/11 12:00 AM	1	1-0172	1	2	1	1	2	2	2	37.7	16.4366	78	10	TRUE	FALSE	FALSE	FALSE	7.93	32	247	5.76	1.51	0.63	40.9	47	15	111	2	<LOD	2	2	2	0	0
2/17/11 12:00 AM	1	1-0173	2	5	2	2	2	2	2	37.6	13.1963	103	14	FALSE	FALSE	FALSE	FALSE	15.94	37.4	235	13.75	1.23	0.95	44.1	39	9	79	1	1	2	2	2	0	0
2/17/11 12:00 AM	1	1-0174	1	2	3	2	2	2	2	38.3	15.8541	87	12	FALSE	FALSE	FALSE	FALSE	5.54	32.6	204	1.1	4	0.39	39.9	42	17	223	2	<LOD	2	2	2	0	0
2/18/11 12:00 AM	1	1-0175	2	4	2	2	1	2	2	38.4	14.5773	98	14	TRUE	FALSE	FALSE	FALSE	14.75	33.5	278	8.92	4.49	1.26	37.9	33	18	55	2	<LOD	2	2	2	0	0
2/21/11 12:00 AM	1	1-0176	1	3	2	2	1	2	2	37.5	20.83	79	13	FALSE	TRUE	FALSE	FALSE	11.75	34.5	383	5.36	5.27	0.79	42.2	49	16	70	2	<LOD	2	2	2	0	2
2/21/11 12:00 AM	1	1-0177	1	2	2	1	2	2	2	38.5	15.1936	87	11.5	FALSE	FALSE	FALSE	FALSE	10.55	34.5	283	3.34	6.21	0.63	38.9	30	13	83	2	<LOD	2	2	2	0	0
2/21/11 12:00 AM	1	1-0178	2	2	3	2	2	2	2	37.8	14.533	87	11	FALSE	FALSE	FALSE	FALSE	5.22	34.5	246	1.17	3.64	0.34	40	51	29	141	2	<LOD	2	2	2	0	0
2/21/11 12:00 AM	1	1-0179	1	3	1	2	2	2	2	38.6	18.937	89	15	FALSE	FALSE	FALSE	FALSE	19.32	34.6	321	12.48	5.18	1.57	42.8	30	12	59	2	<LOD	2	2	2	0	0
2/21/11 12:00 AM	1	1-0180	1	5	2	2	2	2	2	39	15.0046	114	19.5	FALSE	FALSE	FALSE	FALSE	18.44	35.1	242	13.06	3.82	1.54	43.2	43	17	115	2	<LOD	2	2	2	0	0
2/22/11 12:00 AM	1	1-0181	1	3	2	2	2	2	2	39	18.2531	86	13.5	TRUE	FALSE	FALSE	FALSE	14.99	37.1	299	8.7	5.39	0.87	41.8	59	24	86	2	<LOD	2	1	2	0	0
2/22/11 12:00 AM	1	1-0182	1	2	1	2	2	2	2	39	18.1787	76	10.5	FALSE	FALSE	FALSE	FALSE	12.58	34.5	323	8.46	2.69	1.4	38.2	57	25	47	1	2	1	1	2	0	0
2/22/11 12:00 AM	1	1-0183	1	5	3	2	2	2	2	37.5	13.2231	110	16	TRUE	FALSE	FALSE	FALSE	7.06	33	272	4.91	1.32	0.8	38.1	40	18	62	2	<LOD	2	2	2	0	0
2/22/11 12:00 AM	1	1-0184	1	14	2	2	2	2	1	37.8	22.3757	161	58	FALSE	FALSE	FALSE	FALSE	3.57	40.6	171	1.98	1.33	0.25	43.7	29	16	112	2	<LOD	2	2	2	0	0
2/22/11 12:00 AM	1	1-0185	2	8	1	2	2	2	1	38	15.1229	115	20	FALSE	FALSE	FALSE	FALSE	7.57	39.2	276	5.94	1.13	0.5	46.3	33	14	100	2	<LOD	2	2	2	0	0
2/22/11 12:00 AM	1	1-0186	2	3	2	2	2	2	2	37.8	21.3068	88	16.5	FALSE	FALSE	FALSE	FALSE	8.45	36.3	202	4.93	2.77	0.75	42.6	32	12	73	2	<LOD	2	2	2	0	0
2/23/11 12:00 AM	1	1-0187	2	13	2	2	2	2	2	37.7	18.6144	156	45.3	FALSE	FALSE	FALSE	FALSE	14.5	37	346	11.22	2.06	1.07	45.8	21	9	66	2	<LOD	2	2	2	0	2
2/23/11 12:00 AM	1	1-0188	1	4	2	2	2	2	1	39.8	15	100	15	FALSE	FALSE	FALSE	FALSE	7.47	32.2	192	5.51	1.34	0.61	45.1	41	16	125	2	<LOD	2	2	2	0	0
2/23/11 12:00 AM	1	1-0189	1	15	2	2	2	2	2	38.5	15.6225	158	39	FALSE	FALSE	FALSE	FALSE	5.75	39.3	271	4.31	0.87	0.5	47.6	36	16	132	2	<LOD	2	2	2	0	0
2/24/11 12:00 AM	1	1-0190	1	13	2	2	2	2	1	37.6	20.9572	162	55	FALSE	FALSE	FALSE	TRUE	3.77	40.3	190	1.86	1.46	0.43	40.6	32	23	104	1	<LOD	1	2	2	0	0
2/25/11 12:00 AM	1	1-0191	2	1	1	2	2	2	2	38	23.6111	60	8.5	FALSE	FALSE	FALSE	FALSE	17.27	32.2	461	3.33	12.6	1.04	46.3	90	104	430	2	<LOD	2	2	2	0	0
2/25/11 12:00 AM	1	1-0192	1	12	2	2	2	2	1	38.5	24.4444	150	55	FALSE	FALSE	FALSE	FALSE	5.12	39.9	155	2.21	2.49	0.41	43.5	42	21	152	2	<LOD	2	2	2	0	0
2/25/11 12:00 AM	1	1-0193	1	5	2	1	2	2	2	37.6	24.811	92	21	FALSE	FALSE	FALSE	FALSE	7.97	38.7	315	6.35	1.25	0.37	44	46	21	72	2	<LOD	2	2	2	0	0
2/25/11 12:00 AM	1	1-0194	1	2	1	1	2	2	2	37.7	14.4795	81	9.5	FALSE	FALSE	FALSE	FALSE	15.17	36	440	9.43	4.23	1.46	44.3	58	21	56	2	<LOD	2	2	2	0	0
2/25/11 12:00 AM	1	1-0195	1	10	1	2	2	2	2	38.5	18.718	148	41	FALSE	FALSE	FALSE	FALSE	10.47	39	251	6.88	2.52	1.07	45.8	27	15	79	2	<LOD	2	2	2	0	0
2/25/11 12:00 AM	1	1-0196	1	3	1	2	2	2	2	38.2	22.6757	84	16	FALSE	FALSE	FALSE	FALSE	9.95	34.1	346	6.18	2.39	0.83	41.5	35	14	72	2	<LOD	2	2	2	0	0
2/25/11 12:00 AM	1	1-0197	1	10	1	1	2	2	2	37.9	14.5679	131	25	FALSE	FALSE	FALSE	FALSE	8.52	33.1	314	6.09	1.55	0.79	44.4	39	19	22	1	2	2	2	2	0	0
2/25/11 12:00 AM	1	1-0198	2	2	1	2	2	2	2	37.6	22.8125	80	14.6	FALSE	FALSE	FALSE	FALSE	16.46	36.9	303	5.29	9.3	0.9	41.9	35	26	46	2	<LOD	2	2	2	0	0
2/25/11 12:00 AM	1	1-0199	2	3	1	2	1	2	2	38	12.8448	86	9.5	FALSE	FALSE	FALSE	FALSE	18.42	37.4	339	6.76	9.54	1.65	43.3	42	19	60	2	<LOD	2	2	2	0	0
2/25/11 12:00 AM	1	1-0200	1	5	3	2	2	2	2	38.4	16.9283	114	22	FALSE	FALSE	FALSE	FALSE	4.71	35.2	103	1.8	2.57	0.28	39.6	33	11	100	2	<LOD	2	2	2	0	0
2/25/11 12:00 AM	1	1-0201	1	2	2	2	2	2	2	37.8	18.902	78	11.5	FALSE	FALSE	FALSE	FALSE	20.62	34	365	9.99	8.14	2.07	42.6	32	17	57	2	<LOD	2	2	2	0	0
2/28/11 12:00 AM	1	1-0202	2	3	1	2	2	2	2	37.7	13.8744	93	12	FALSE	FALSE	FALSE	FALSE	8	35.1	292	4.01	3.16	0.74	40.3	47	18	62	2	<LOD	2	2	2	0	0
2/28/11 12:00 AM	1	1-0203	1	5	1	1	2	2	1	37.8	26.4463	110	32	FALSE	FALSE	FALSE	FALSE	9.35	36.4	281	6.49	2.05	0.74	45.8	33	19	69	2	<LOD	2	2	2	0	0
2/28/11 12:00 AM	1	1-0204	2	4	2	2	2	2	2	37.5	17.5666	104	19	FALSE	FALSE	FALSE	FALSE	13.88	34.6	335	7.13	5.74	0.85	42.2	28	13	93	2	<LOD	2	2	2	0	0
2011-01-03	1	1-0205	1	6	2	1	2	2	2	37.6	20.4544	117	28	FALSE	FALSE	FALSE	FALSE	13.16	33.3	327	8.25	3.71	1	38.4	38	10	130	2	<LOD	2	2	2	0	0
2011-02-03	1	1-0206	1	2	2	1	2	2	1	37.8	21.3333	75	12	FALSE	FALSE	FALSE	FALSE	11.14	34.2	224	3.37	6.82	0.8	42.9	52	16	97	2	<LOD	2	1	2	0	0
2011-02-03	1	1-0207	2	3	2	1	2	2	1	37.6	20.1189	81	13.2	FALSE	FALSE	FALSE	FALSE	13.26	35.1	331	3.47	8.47	1.15	40.2	36	14	116	2	<LOD	2	2	2	0	0
2011-02-03	1	1-0208	2	15	2	2	2	2	1	37.8	18.7305	155	45	FALSE	FALSE	FALSE	FALSE	4.42	41.8	158	2.66	1.34	0.33	43.9	53	22	78	2	<LOD	2	2	2	0	2
2011-02-03	1	1-0209	2	5	2	2	2	2	1	38.3	18.75	120	27	TRUE	FALSE	FALSE	TRUE	3.76	35.1	173	1.59	1.83	0.3	43.8	52	22	79	1	2	2	2	2	0	0
2011-03-03	1	1-0210	2	3	2	2	1	2	1	38	18.2899	81	12	FALSE	FALSE	TRUE	FALSE	7.95	33	184	4.07	3.37	0.47	44.1	52	16	121	2	<LOD	2	2	2	0	0
2011-03-03	1	1-0211	1	4	1	1	1	2	2	38.6	15.3787	102	16	FALSE	FALSE	FALSE	FALSE	13.8	40.4	190	11.84	0.8	1.11	46.4	44	16	571	2	<LOD	2	2	2	0	0
2011-03-03	1	1-0212	2	3	1	1	2	2	2	38.8	17.5771	86	13	FALSE	FALSE	FALSE	FALSE	8.54	37.2	180	4.27	3.69	0.58	43	48	22	106	2	<LOD	2	2	2	0	0
2011-04-03	1	1-0213	1	6	1	2	2	2	2	38	21.9282	115	29	FALSE	FALSE	TRUE	FALSE	17.1	44.1	380	11.32	4.36	0.8	48.6	49	26	120	2	<LOD	2	2	2	0	0
2011-04-03	1	1-0214	2	2	1	2	2	2	2	38	14.7929	78	9	FALSE	FALSE	FALSE	FALSE	28	36.6	450	21.32	5.41	1.17	40.3	41	14	44	2	<LOD	2	2	2	0	0
2011-04-03	1	1-0215	2	2	2	2	2	2	2	38.5	13.6423	78	8.3	FALSE	FALSE	FALSE	FALSE	21.13	39	321	12.73	6.97	1.41	45.2	59	21	91	2	<LOD	2	2	2	0	0
2011-04-03	1	1-0216	1	5	2	2	2	2	2	37.8	13.6603	121	20	FALSE	FALSE	FALSE	FALSE	11.69	41.9	285	7.37	3.19	1.12	45.6	50	11	138	2	<LOD	2	2	2	0	0
2011-07-03	1	1-0217	2	3	2	2	1	2	2	38.1	14.7125	94	13	FALSE	FALSE	FALSE	FALSE	15.07	33.8	265	10.05	3.61	0.96	37.2	33	12	60	2	<LOD	2	2	2	0	0
2011-07-03	1	1-0218	1	4	1	2	2	2	2	39	13.0054	116	17.5	FALSE	FALSE	FALSE	FALSE	15.91	38	457	12.99	1.83	1.07	48.4	38	20	63	2	<LOD	2	2	2	0	2
2011-07-03	1	1-0219	1	5	1	2	2	2	2	39	14.1233	119	20	FALSE	FALSE	FALSE	FALSE	10.22	36.4	324	6.39	3	0.83	47.4	50	20	72	2	<LOD	2	2	2	0	0
2011-07-03	1	1-0220	1	11	3	2	2	2	2	38	23.4566	146	50	FALSE	FALSE	FALSE	FALSE	7.31	38.3	206	4.3	2.55	0.44	41.9	31	22	90	2	<LOD	2	2	2	0	0
2011-08-03	1	1-0221	2	6	2	2	2	2	2	36.9	16.3028	118	22.7	FALSE	FALSE	FALSE	FALSE	8.57	34.7	336	5.64	2.48	0.36	39.3	36	12	91	2	<LOD	2	2	2	0	2
2011-08-03	1	1-0222	1	9	2	1	1	2	2	38.6	20.1183	130	34	FALSE	FALSE	FALSE	FALSE	12	40.3	395	10.01	1.74	0.18	39.6	45	17	71	2	<LOD	2	2	2	0	0
2011-08-03	1	1-0223	1	7	1	1	2	2	2	37.8	21.462	124	33	FALSE	FALSE	FALSE	FALSE	5.48	31	219	2.25	2.85	0.36	42.8	49	22	220	2	<LOD	2	2	2	0	0
2011-08-03	1	1-0224	2	4	2	2	2	2	2	38.2	12.4314	108	14.5	FALSE	FALSE	FALSE	FALSE	8.9	32.4	336	5.23	3.2	0.46	44	28	8	76	1	<LOD	1	2	2	0	0
2011-08-03	1	1-0225	2	8	2	1	2	2	2	37.8	14.7929	130	25	FALSE	FALSE	FALSE	FALSE	3.62	39.5	162	1.32	2.08	0.22	39.6	42	13	123	1	1	1	1	2	0	0
2011-09-03	1	1-0226	2	4	2	2	1	2	2	38.3	13.8683	104	15	FALSE	FALSE	FALSE	FALSE	5.17	35.9	150	2.77	1.74	0.63	43.5	45	8	69	1	3	1	1	2	0	0
2011-09-03	1	1-0227	2	2	2	2	2	2	2	38.5	13.8871	89	11	FALSE	FALSE	FALSE	FALSE	27.34	35.4	393	19.24	5.26	2.8	39.4	39	10	51	2	<LOD	2	2	2	0	0
2011-09-03	1	1-0228	2	3	2	2	2	2	2	37.6	14.5773	98	14	FALSE	FALSE	FALSE	FALSE	9.66	38.6	304	5.05	3.6	0.92	45.4	37	16	70	2	<LOD	2	2	2	0	0
2011-10-03	1	1-0229	1	6	1	2	2	2	2	39.1	11.6112	121	17	FALSE	FALSE	FALSE	FALSE	4.96	34.4	333	3.72	0.78	0.42	42.7	25	13	72	2	<LOD	2	2	2	0	0
2011-10-03	1	1-0230	1	2	2	1	2	2	2	38.5	16.609	85	12	FALSE	FALSE	FALSE	FALSE	15.06	34.4	495	12.23	2.52	0.28	47.5	36	19	118	2	<LOD	2	2	2	0	0
2011-11-03	1	1-0231	1	4	2	2	2	2	2	38	13.9509	112	17.5	TRUE	FALSE	FALSE	TRUE	11.73	36.6	352	6.71	4.03	0.9	45.7	50	13	239	2	<LOD	2	2	2	0	0
2011-11-03	1	1-0232	1	3	1	2	2	2	2	39.3	17.8465	82	12	FALSE	FALSE	FALSE	TRUE	12.25	36.7	268	9.49	1.86	0.87	47.8	51	14	53	2	<LOD	2	2	2	0	0
2011-11-03	1	1-0233	2	4	2	2	2	2	2	38	11.4536	98	11	FALSE	FALSE	FALSE	FALSE	9.52	33.3	248	4.45	4.72	0.29	41.9	54	14	101	2	<LOD	2	2	2	0	0
2011-11-03	1	1-0234	2	3	2	2	2	2	2	38.2	20.3223	83	14	TRUE	FALSE	FALSE	FALSE	11.29	35.5	377	7.01	3.64	0.62	39.5	59	25	70	2	<LOD	2	2	2	0	0
3/14/11 12:00 AM	1	1-0235	2	4	2	1	2	2	1	37.6	12.1743	111	15	FALSE	FALSE	FALSE	FALSE	4.46	36.7	218	2.17	1.9	0.35	41.2	50	11	172	2	<LOD	2	2	2	0	0
3/14/11 12:00 AM	1	1-0236	1	3	2	1	2	2	1	38	16.0241	103	17	FALSE	FALSE	FALSE	FALSE	11.98	36.4	171	5.45	5.2	0.72	48.3	58	35	115	2	<LOD	2	2	2	0	0
3/14/11 12:00 AM	1	1-0237	2	2	2	2	2	2	2	38.2	19.8373	71	10	FALSE	FALSE	TRUE	FALSE	7.94	31.5	211	2.79	4.74	0.4	36.8	38	23	38	2	<LOD	2	2	2	0	0
3/14/11 12:00 AM	1	1-0238	2	10	2	2	2	2	2	38.8	18.9036	138	36	TRUE	FALSE	FALSE	FALSE	9.35	37.8	222	6.75	1.76	0.78	39.7	34	14	93	2	<LOD	2	2	2	0	0
3/14/11 12:00 AM	1	1-0239	1	3	2	2	2	2	2	39.3	15.4321	90	12.5	FALSE	FALSE	FALSE	FALSE	14.66	33.2	446	10.18	3.13	1.26	41.2	44	12	53	1	2	3	2	2	0	0
3/15/11 12:00 AM	1	1-0240	1	2	2	1	2	2	2	37.8	16.2432	98	15.6	FALSE	FALSE	TRUE	FALSE	10	37.4	333	4	5.04	0.86	43.5	45	16	116	2	<LOD	2	2	2	0	0
3/16/11 12:00 AM	1	1-0241	1	14	3	1	2	2	2	38.5	23.0518	164	62	TRUE	FALSE	FALSE	FALSE	8.92	43.6	238	5.89	2.51	0.49	45.9	23	14	95	2	<LOD	2	2	2	0	2
3/18/11 12:00 AM	1	1-0242	2	3	2	1	2	2	2	37.6	17.0433	89	13.5	FALSE	FALSE	FALSE	FALSE	5.56	32	213	1.53	3.36	0.4	43.4	35	5	49	2	<LOD	2	2	2	0	0
3/18/11 12:00 AM	1	1-0243	1	5	2	2	1	2	2	38	21.1457	102	22	FALSE	FALSE	FALSE	FALSE	10.39	35.7	291	7.14	2.49	0.63	44.8	26	12	133	2	<LOD	2	2	2	0	0
3/18/11 12:00 AM	1	1-0244	1	4	1	2	2	1	2	37.5	15.6185	98	15	FALSE	FALSE	FALSE	FALSE	8.69	33.2	342	4	4.04	0.54	41.5	32	10	105	1	1	2	2	2	0	0
3/21/11 12:00 AM	1	1-0245	2	4	2	1	2	2	2	38	16.8186	96	15.5	TRUE	FALSE	FALSE	FALSE	11.93	36.2	205	6.66	4.35	0.72	47.1	58	16	112	2	<LOD	2	2	2	0	0
3/21/11 12:00 AM	1	1-0246	2	8	2	1	2	2	1	39	13.6576	124	21	FALSE	FALSE	FALSE	FALSE	15.23	37.1	331	12.35	1.63	1.24	45.3	15	31	54	2	<LOD	2	2	2	0	0
3/23/11 12:00 AM	1	1-0247	2	3	2	2	2	2	2	38.5	13.9509	112	17.5	TRUE	FALSE	FALSE	FALSE	11.26	37.2	290	7.92	2.46	0.86	43.8	48	19	64	2	<LOD	2	2	2	0	0
3/23/11 12:00 AM	1	1-0248	2	10	2	2	2	2	2	38.8	17.301	136	32	FALSE	FALSE	FALSE	FALSE	11.58	38.7	258	7.54	3.09	0.93	44.1	28	14	73	2	<LOD	2	2	2	0	0
3/25/11 12:00 AM	1	1-0249	1	2	1	2	2	2	2	37.2	14.1777	92	12	TRUE	FALSE	FALSE	FALSE	13.28	40.4	185	5.62	6.42	1.04	47.8	46	15	165	2	<LOD	2	2	2	0	0
3/25/11 12:00 AM	1	1-0250	2	8	3	2	2	2	2	37.4	11.6543	131	20	TRUE	FALSE	FALSE	FALSE	5.6	34.3	142	3.09	2.2	0.29	42.5	63	19	93	2	<LOD	2	2	2	0	0
3/28/11 12:00 AM	1	1-0251	1	11	1	2	1	2	2	37.5	12.7551	140	25	FALSE	FALSE	FALSE	FALSE	5.78	35.8	195	3.42	1.59	0.62	44.4	28	10	89	2	<LOD	2	2	2	0	0
3/28/11 12:00 AM	1	1-0252	2	2	2	2	2	2	2	38	18.6667	75	10.5	FALSE	FALSE	TRUE	TRUE	17.12	36.1	250	9.05	6.55	1.38	43.1	60	45	93	2	<LOD	2	2	2	0	0
3/28/11 12:00 AM	1	1-0253	1	5	1	2	1	2	2	38.1	14.0496	110	17	FALSE	FALSE	TRUE	TRUE	6.33	36.4	258	4.45	1.44	0.32	43.4	37	17	83	2	<LOD	2	2	2	0	0
3/28/11 12:00 AM	1	1-0254	1	7	2	2	2	2	1	37.8	13.8889	120	20	FALSE	FALSE	TRUE	FALSE	4.32	34.4	167	1.62	2.22	0.35	43.4	33	12	93	2	<LOD	2	2	2	0	0
3/30/11 12:00 AM	1	1-0255	2	2	2	2	1	2	2	37.5	15.5489	86	11.5	FALSE	FALSE	FALSE	FALSE	6.1	33.6	306	1.36	4.35	0.38	43.2	47	18	112	2	<LOD	2	2	2	0	0
3/30/11 12:00 AM	1	1-0256	2	11	3	2	2	2	2	37.8	14.7929	130	25	FALSE	FALSE	FALSE	FALSE	14.76	40.3	368	10.8	2.99	0.73	40.8	28	11	113	2	<LOD	2	2	2	0	0
3/30/11 12:00 AM	1	1-0257	1	8	3	2	2	1	2	38.1	12.2942	121	18	FALSE	FALSE	FALSE	FALSE	12.95	37.4	529	7.02	4.97	0.86	42.8	84	86	94	2	<LOD	2	1	2	0	0
3/30/11 12:00 AM	1	1-0258	2	2	2	2	2	2	2	38	18.3256	72	9.5	FALSE	FALSE	FALSE	FALSE	11.61	37.1	138	2.04	8.33	1.15	39.7	57	15	44	2	<LOD	2	2	2	0	2
3/31/11 12:00 AM	1	1-0259	1	3	1	2	2	2	2	38	15	100	15	FALSE	FALSE	TRUE	TRUE	12.15	41.4	96	10.2	1.24	0.67	46.1	42	11	84	1	4	2	2	1	1	2
3/31/11 12:00 AM	1	1-0260	1	12	1	2	1	2	1	38.5	20.8292	142	42	FALSE	FALSE	FALSE	TRUE	12.7	38.3	280	10.26	1.66	0.71	43	29	24	102	2	<LOD	2	2	2	0	0
3/31/11 12:00 AM	1	1-0261	2	5	1	2	2	2	2	38.5	21.4876	110	26	FALSE	FALSE	TRUE	TRUE	8.7	40.6	280	6.11	1.26	1.29	46.1	31	17	42	2	<LOD	2	2	2	0	0
2011-01-04	1	1-0262	1	8	2	2	1	2	2	37.5	12.5976	126	20	FALSE	FALSE	FALSE	TRUE	8.19	34.1	166	4.59	2.81	0.73	40	35	14	107	2	<LOD	2	2	2	0	2
2011-01-04	1	1-0263	1	7	1	1	1	2	1	38.5	11.52	125	18	FALSE	FALSE	FALSE	FALSE	7.62	41.7	220	5.72	0.95	0.35	46.9	54	21	81	2	<LOD	2	2	2	0	0
2011-01-04	1	1-0264	1	4	2	2	2	2	2	38.5	15.6847	101	16	TRUE	FALSE	FALSE	TRUE	18.43	39.7	353	8.66	7.96	0.62	39.3	59	20	132	2	<LOD	2	2	2	0	0
2011-05-04	1	1-0265	1	2	3	2	2	2	2	38	13.2118	87	10	FALSE	FALSE	FALSE	FALSE	9.34	32	206	4.35	3.84	0.77	39.5	60	31	83	2	<LOD	2	2	2	0	0
2011-06-04	1	1-0266	1	5	1	1	1	2	2	37.5	22.46	87	17	FALSE	FALSE	TRUE	TRUE	13.07	38.2	366	10.67	1.73	0.65	48.2	40	13	77	2	<LOD	2	2	2	0	0
2011-06-04	1	1-0267	2	13	1	2	1	2	1	39	17.0799	139	33	FALSE	FALSE	TRUE	TRUE	7.74	35.4	239	6.38	0.83	0.53	45.6	64	38	120	1	1	1	1	2	0	0
2011-07-04	1	1-0268	1	1	1	2	2	2	2	38.2	17.7778	75	10	FALSE	FALSE	FALSE	FALSE	11.25	39.1	187	5.64	3.99	1.58	44	59	30	115	2	<LOD	2	2	2	0	0
2011-07-04	1	1-0269	1	3	2	2	2	2	1	38	14.4044	95	13	FALSE	FALSE	FALSE	TRUE	7.31	34.5	206	6.02	0.88	0.4	40.8	38	17	69	2	<LOD	2	2	2	0	0
2011-07-04	1	1-0270	1	9	2	1	1	2	2	37.8	19.5266	130	33	FALSE	FALSE	FALSE	TRUE	8.12	41.1	304	4	3.16	0.91	49.2	39	16	244	2	<LOD	2	2	2	0	0
2011-07-04	1	1-0271	2	7	3	2	2	2	2	37.8	13.8889	120	20	FALSE	FALSE	FALSE	FALSE	14.48	41.2	265	11.38	2.35	0.68	46.8	30	15	48	2	<LOD	2	2	2	0	0
2011-08-04	1	1-0272	2	4	1	1	1	1	1	38.7	15.4321	90	12.5	FALSE	FALSE	FALSE	FALSE	12.61	35.7	299	9.93	1.8	0.82	42.6	36	12	65	2	<LOD	2	2	2	0	0
2011-08-04	1	1-0273	1	4	2	1	1	2	2	38.8	19.2234	102	20	FALSE	FALSE	FALSE	FALSE	10.93	35.1	279	8.18	2.1	0.63	43	51	21	116	1	1	2	2	2	0	0
2011-11-04	1	1-0274	1	2	2	2	2	2	2	38.3	14.6092	74	8	FALSE	FALSE	FALSE	FALSE	11.54	33.1	325	6.04	4.38	1.1	44.1	45	13	114	2	<LOD	2	2	2	0	2
2011-11-04	1	1-0275	2	6	2	2	2	2	2	37.8	14.6199	114	19	TRUE	FALSE	FALSE	FALSE	8.01	34.8	209	4.33	2.86	0.81	41.1	38	16	76	2	<LOD	2	2	2	0	0
4/14/11 12:00 AM	1	1-0276	2	1	2	1	2	2	2	38	20.4082	70	10	FALSE	FALSE	FALSE	FALSE	10.23	34.5	142	4.42	4.72	1.09	42.8	75	23	162	2	<LOD	2	2	2	0	0
4/15/11 12:00 AM	1	1-0277	1	5	2	2	2	2	2	37.8	18.0288	104	19.5	FALSE	FALSE	FALSE	FALSE	10.6	36.8	273	8.48	1.54	0.55	37.7	59	33	252	2	<LOD	2	2	2	0	0
4/15/11 12:00 AM	1	1-0278	2	7	2	2	2	2	2	38.5	13.7741	132	24	FALSE	FALSE	FALSE	FALSE	13.38	38.8	239	8.75	3.15	1.45	43	29	10	59	2	<LOD	2	2	2	0	0
4/15/11 12:00 AM	1	1-0279	1	12	2	2	2	2	2	38.5	14.878	142	30	FALSE	FALSE	FALSE	FALSE	12.35	39.5	233	9.49	1.91	0.94	44.9	77	53	116	2	<LOD	2	2	2	0	0
4/15/11 12:00 AM	1	1-0280	1	4	2	2	1	2	2	38.6	11.8906	116	16	FALSE	FALSE	FALSE	FALSE	12.96	31.9	345	8.37	2.81	1.72	40.3	31	12	45	2	<LOD	2	2	2	0	0
4/18/11 12:00 AM	1	1-0281	2	3	2	2	2	2	2	38.3	12.2537	101	12.5	FALSE	FALSE	FALSE	FALSE	4.6	33	132	1.41	2.92	0.24	39.9	51	19	110	2	<LOD	2	2	2	0	0
4/18/11 12:00 AM	1	1-0282	2	3	2	2	2	2	2	38	10	100	10	FALSE	FALSE	FALSE	FALSE	9.95	32.7	149	6.09	3.2	0.51	41.1	42	12	74	2	<LOD	2	2	2	0	0
4/25/11 12:00 AM	1	1-0283	1	4	2	2	2	2	2	38	12.7538	99	12.5	FALSE	FALSE	FALSE	FALSE	14.25	34.4	474	9.67	3.44	0.84	42	36	12	61	2	<LOD	2	2	2	0	0
4/25/11 12:00 AM	1	1-0284	2	4	1	1	2	2	2	38.5	13.8683	104	15	FALSE	FALSE	FALSE	FALSE	12.62	32.4	241	8.52	3.06	0.94	41.1	35	7	109	2	<LOD	2	2	2	0	0
4/28/11 12:00 AM	1	1-0285	1	8	2	1	2	2	1	38.3	15.2588	128	25	FALSE	FALSE	FALSE	FALSE	4.52	35.6	337	2.23	1.71	0.57	42.8	41	17	85	2	<LOD	2	2	2	0	0
2011-04-05	1	1-0286	2	2	3	1	2	2	1	38.3	19.3772	85	14	FALSE	FALSE	FALSE	FALSE	20.2	33.9	257	9.11	9.49	1.33	42.7	54	37	83	2	<LOD	2	2	2	0	2
2011-04-05	1	1-0287	1	2	3	1	2	2	2	37.9	14.1059	96	13	FALSE	FALSE	FALSE	FALSE	15.64	33.2	355	8.01	6.36	1.18	40.8	51	15	94	2	<LOD	2	2	2	0	0
2011-04-05	1	1-0288	2	2	2	1	2	1	2	37.7	16.225	86	12	FALSE	FALSE	FALSE	FALSE	11.09	37.5	337	5.43	4.9	0.66	41.9	44	24	278	2	<LOD	2	2	2	0	0
2011-06-05	1	1-0289	1	4	2	2	2	2	2	38.5	18.937	89	15	FALSE	FALSE	FALSE	FALSE	8.45	35.3	243	2.44	5.36	0.53	37.3	47	18	78	2	<LOD	2	2	2	0	0
2011-06-05	1	1-0290	2	2	2	1	1	2	2	38.7	27.832	64	11.4	FALSE	FALSE	FALSE	FALSE	5.65	35.5	435	4.02	1.09	0.51	39.9	34	7	53	2	<LOD	2	2	2	0	0
2011-06-05	1	1-0291	1	4	1	1	1	2	2	39	23.6295	92	20	FALSE	FALSE	FALSE	FALSE	12.05	36.3	337	9.35	2.39	0.28	46.8	32	11	17	2	<LOD	2	2	2	0	0
2011-06-05	1	1-0292	1	5	2	2	1	2	2	38	13.8798	117	19	FALSE	FALSE	FALSE	FALSE	16.33	32	276	11.28	3.94	1.09	38.9	29	10	96	2	<LOD	2	2	2	0	0
2011-09-05	1	1-0293	1	2	2	2	2	2	2	38.1	15.7541	88	12.2	FALSE	FALSE	TRUE	TRUE	3.69	39.3	235	1.99	1.42	0.27	44	56	20	101	2	<LOD	2	2	2	0	0
2011-09-05	1	1-0294	1	3	1	1	2	2	1	37.8	14.7929	104	16	FALSE	FALSE	FALSE	TRUE	9.44	38.6	207	7.44	1.49	0.51	48.5	45	28	115	2	<LOD	2	2	2	0	0
2011-09-05	1	1-0295	1	4	1	2	2	2	2	39	13.7949	106	15.5	TRUE	FALSE	FALSE	TRUE	17.45	36.7	276	12.86	2.73	1.76	45.9	30	17	40	2	<LOD	2	2	2	0	0
2011-09-05	1	1-0296	1	5	1	1	2	2	2	38	11.491	118	16	FALSE	FALSE	FALSE	FALSE	22.09	42.4	252	18.47	2.37	1.23	43.9	35	18	74	2	<LOD	2	2	2	0	0
2011-11-05	1	1-0297	1	13	2	2	2	2	2	38.5	12.8943	142	26	FALSE	FALSE	FALSE	FALSE	11.7	39	280	8.18	1.88	0.39	44.6	30	22	66	2	<LOD	2	2	2	0	0
5/13/11 12:00 AM	1	1-0298	2	2	2	2	2	2	2	38	15.2249	85	11	TRUE	FALSE	FALSE	FALSE	28.54	37.4	286	16.09	9.46	2.9	40.4	37	11	27	2	<LOD	2	2	2	0	2
5/17/11 12:00 AM	1	1-0299	2	2	3	2	2	2	2	38	14.1975	90	11.5	FALSE	FALSE	FALSE	FALSE	11.6	36.9	247	5.68	4.92	0.9	46	42	17	97	2	<LOD	2	2	2	0	0
5/20/11 12:00 AM	1	1-0300	1	9	3	1	2	2	1	38.5	15.3061	140	30	FALSE	FALSE	FALSE	FALSE	3.4	38.6	109	2	1.1	0.3	37.7	73	38	344	1	2	1	1	1	2	1
5/23/11 12:00 AM	1	1-0301	1	6	3	2	1	2	2	38.2	13.8889	120	20	FALSE	FALSE	FALSE	TRUE	13.75	34.3	319	9.1	3.79	0.78	40.2	33	12	108	2	<LOD	2	2	2	0	0
5/23/11 12:00 AM	1	1-0302	1	5	2	2	1	2	1	38.6	17.1598	130	29	FALSE	FALSE	FALSE	TRUE	9.45	36.9	158	6.68	1.89	0.79	37.9	26	18	73	2	<LOD	2	2	2	0	0
5/23/11 12:00 AM	1	1-0303	2	3	2	2	1	2	1	38.5	12.0192	104	13	FALSE	FALSE	TRUE	TRUE	20.72	34.8	420	12.83	6.53	1.1	40.2	33	12	62	2	<LOD	2	2	2	0	0
5/23/11 12:00 AM	1	1-0304	1	2	1	1	2	2	2	38	15.8443	94	14	FALSE	FALSE	FALSE	FALSE	9.25	34.8	258	5.18	3.31	0.6	41.8	39	14	107	2	<LOD	2	2	2	0	0
5/23/11 12:00 AM	1	1-0305	2	1	1	2	2	2	2	38.6	18.4265	79	11.5	FALSE	FALSE	FALSE	FALSE	6.8	36.7	234	3.62	2.75	0.42	43	81	66	211	2	<LOD	2	2	2	0	0
5/24/11 12:00 AM	1	1-0306	1	1	1	2	2	2	2	38.5	23.7889	68	11	FALSE	FALSE	FALSE	FALSE	13.15	38.2	294	9.24	2.63	1.26	44.1	41	20	357	2	<LOD	2	2	2	0	0
5/24/11 12:00 AM	1	1-0307	1	2	1	2	2	2	2	38.7	19.8373	71	10	FALSE	FALSE	FALSE	FALSE	11.33	33.5	295	6.82	2.67	1.79	42.4	46	19	131	2	<LOD	2	2	2	0	0
5/24/11 12:00 AM	1	1-0308	2	8	2	2	2	2	2	38.2	14.0611	132	24.5	FALSE	FALSE	FALSE	FALSE	2.7	32.7	132	1.65	0.87	0.18	37.8	39	16	45	1	1	1	1	2	0	0
5/24/11 12:00 AM	1	1-0309	2	5	2	1	2	2	2	37.8	13.6054	105	15	FALSE	FALSE	FALSE	FALSE	9.28	30.9	127	7.11	1.8	0.37	39.4	51	14	141	1	1	2	2	2	0	0
5/24/11 12:00 AM	1	1-0310	2	2	2	1	2	2	2	38.5	18.8455	71	9.5	FALSE	FALSE	FALSE	FALSE	12.73	36.7	80	8.55	3.65	0.44	47.1	50	15	57	2	<LOD	2	2	2	0	0
5/24/11 12:00 AM	1	1-0311	2	4	2	1	2	2	2	38.7	12.6024	138	24	FALSE	FALSE	FALSE	TRUE	6.76	40.3	180	4.15	2.15	0.44	39.3	45	17	66	1	1	1	1	1	2	1
5/24/11 12:00 AM	1	1-0312	1	8	1	2	2	2	2	38.7	11.3065	133	20	FALSE	FALSE	FALSE	FALSE	12.11	35	358	7.05	3.82	0.71	42.6	33	16	78	2	<LOD	2	2	2	0	0
5/24/11 12:00 AM	1	1-0313	1	11	2	2	2	2	2	38.8	21.6413	152	50	FALSE	FALSE	TRUE	FALSE	5.14	38.8	212	2.84	1.76	0.48	40.4	35	18	140	1	3	3	2	2	0	0
5/24/11 12:00 AM	1	1-0314	2	6	3	2	1	2	2	37.9	21.5455	118	30	FALSE	FALSE	TRUE	FALSE	11.62	41.4	373	9.86	1.11	0.35	37.9	56	50	40	2	<LOD	2	2	2	0	2
5/24/11 12:00 AM	1	1-0315	2	2	3	1	2	2	2	39	13.5802	90	11	FALSE	FALSE	FALSE	FALSE	5.16	37	113	0.77	4.12	0.21	39	50	27	173	2	<LOD	2	2	2	0	0
5/24/11 12:00 AM	1	1-0316	2	2	2	1	2	2	2	38.1	19.052	81	12.5	FALSE	FALSE	FALSE	FALSE	6.62	35.9	162	1.58	4.42	0.61	40.8	43	17	164	2	<LOD	2	2	2	0	0
5/25/11 12:00 AM	1	1-0317	2	1	2	1	2	2	2	38.4	18.6981	76	10.8	FALSE	FALSE	FALSE	FALSE	6.75	38.3	241	2.33	3.85	0.56	41.5	40	15	138	2	<LOD	2	2	2	0	0
5/25/11 12:00 AM	1	1-0318	2	2	2	2	2	2	1	38.6	24.2188	80	15.5	TRUE	FALSE	TRUE	FALSE	21.12	36.9	434	15.87	3.94	1.29	46.7	47	32	106	2	<LOD	2	2	2	0	0
5/26/11 12:00 AM	1	1-0319	1	10	3	2	2	2	2	38.6	15.5271	139	30	FALSE	FALSE	FALSE	FALSE	2.01	39.8	102	0.99	0.79	0.21	42.9	32	18	75	2	<LOD	2	2	2	0	0
5/27/11 12:00 AM	1	1-0320	1	3	2	2	2	2	1	37.8	14	100	14	FALSE	FALSE	FALSE	FALSE	11.12	34.6	206	5.6	4.02	1.19	41.6	48	19	67	2	<LOD	2	2	2	0	0
5/27/11 12:00 AM	1	1-0321	2	1	2	1	2	2	1	38.2	19.3772	85	14	FALSE	FALSE	TRUE	FALSE	23.71	34.7	335	9.61	12.46	1.63	45	27	18	20	2	<LOD	2	2	2	0	0
5/27/11 12:00 AM	1	1-0322	1	2	2	2	2	2	2	38.8	14.8148	90	12	FALSE	FALSE	FALSE	TRUE	15.24	36.8	353	4.1	10.3	0.65	46.1	34	7	77	2	<LOD	2	2	2	0	0
5/27/11 12:00 AM	1	1-0323	2	12	2	2	2	1	1	38.4	20.1733	159	51	FALSE	FALSE	FALSE	TRUE	4.32	41	122	3.03	0.93	0.34	49.4	47	34	119	1	1	1	2	1	2	1
5/27/11 12:00 AM	1	1-0324	1	1	2	2	2	2	2	38.2	15.1796	77	9	FALSE	FALSE	TRUE	FALSE	12.05	31.2	214	6.46	4.81	0.73	39.2	78	90	77	2	<LOD	2	2	2	0	0
5/31/11 12:00 AM	1	1-0325	1	2	2	2	2	2	2	38	14.8148	90	12	FALSE	FALSE	FALSE	FALSE	13.2	34.9	256	6.27	5.95	0.93	39.3	41	11	87	2	<LOD	2	2	2	0	0
5/31/11 12:00 AM	1	1-0326	1	5	1	2	1	1	1	37.7	12.0185	129	20	FALSE	FALSE	TRUE	TRUE	11.47	38.4	282	8.44	1.94	0.35	40.7	38	25	110	2	<LOD	2	2	2	0	0
5/31/11 12:00 AM	1	1-0327	1	2	2	1	2	2	1	38.6	17.7154	84	12.5	FALSE	FALSE	FALSE	FALSE	21.32	37	328	11.23	7.83	2.22	42.1	39	15	306	2	<LOD	2	2	2	0	2
5/31/11 12:00 AM	1	1-0328	2	2	1	2	2	2	2	38.2	13.5802	90	11	FALSE	FALSE	TRUE	FALSE	12.43	34.4	335	6.25	5.52	0.64	42.6	50	21	69	2	<LOD	2	2	2	0	0
5/31/11 12:00 AM	1	1-0329	2	8	2	2	2	1	1	38.8	23.4096	116	31.5	FALSE	FALSE	TRUE	TRUE	9.52	41.7	191	6.5	2.24	0.77	50.3	32	20	55	2	<LOD	2	2	2	0	0
2011-01-06	1	1-0330	2	7	3	2	1	2	1	38	13.2196	123	20	FALSE	FALSE	FALSE	TRUE	7.67	38.5	202	5.69	1.48	0.48	44.5	24	16	56	1	1	2	2	2	0	0
2011-01-06	1	1-0331	1	11	3	1	2	2	2	38.5	19.2277	158	48	FALSE	FALSE	FALSE	FALSE	2.39	39.7	182	1	0.91	0.41	47.7	34	11	154	2	<LOD	2	2	2	0	0
2011-02-06	1	1-0332	2	11	2	1	2	2	2	38	16.2197	136	30	FALSE	FALSE	FALSE	FALSE	2.72	37.5	156	1.9	0.7	0.12	40.5	54	34	116	1	1	1	1	1	2	1
2011-06-06	1	1-0333	1	3	1	1	2	2	2	38.2	13.5802	90	11	FALSE	FALSE	FALSE	FALSE	9.07	35.6	292	6.39	1.99	0.63	47.1	44	19	164	2	<LOD	2	2	2	0	0
2011-06-06	1	1-0334	2	2	2	1	2	2	2	38.5	16.9062	91	14	FALSE	FALSE	FALSE	FALSE	11.97	32.1	363	2.99	8.04	0.88	40.4	46	29	133	2	<LOD	2	2	2	0	0
2011-08-06	1	1-0335	1	10	2	1	1	2	1	38.6	13.9853	144	29	FALSE	FALSE	FALSE	FALSE	12.51	36.1	299	10.1	1.98	0.39	49.7	29	12	100	2	<LOD	2	2	2	0	2
2011-10-06	1	1-0336	2	1	3	1	2	1	1	38	21.2191	72	11	TRUE	FALSE	TRUE	FALSE	13.74	32.1	254	7.86	4.45	1.34	40.7	49	25	98	2	<LOD	2	2	2	0	0
2011-10-06	1	1-0337	1	7	2	1	2	1	1	38.5	13.8889	120	20	FALSE	FALSE	FALSE	TRUE	2.39	33.3	100	1.03	1.15	0.2	41.2	78	30	188	1	2	2	2	1	2	1
2011-10-06	1	1-0338	1	2	2	2	2	2	2	38.8	15.1852	90	12.3	FALSE	FALSE	FALSE	TRUE	5.66	29.4	189	2.89	2.16	0.57	46.1	37	14	106	2	<LOD	2	2	2	0	0
6/13/11 12:00 AM	1	1-0339	2	5	1	2	2	2	2	38	15.7025	110	19	FALSE	FALSE	FALSE	FALSE	9.02	37.8	198	6.47	1.84	0.59	40.4	33	14	102	2	<LOD	2	2	2	0	0
6/13/11 12:00 AM	1	1-0340	2	7	1	2	2	2	2	38.6	20.1559	122	30	FALSE	FALSE	FALSE	FALSE	12.29	37.3	276	9.87	2.16	0.23	41.7	33	19	67	2	<LOD	2	2	2	0	0
6/13/11 12:00 AM	1	1-0341	1	9	2	2	2	2	2	38.5	13.0178	130	22	FALSE	FALSE	FALSE	FALSE	20.31	34.4	349	14.36	4.34	1.55	43.2	49	39	46	2	<LOD	2	2	2	0	0
6/13/11 12:00 AM	1	1-0342	2	11	3	1	1	2	2	38.3	20.4082	140	40	FALSE	FALSE	FALSE	FALSE	6.03	39.4	157	3.89	1.48	0.64	40.3	35	21	59	2	<LOD	2	2	2	0	0
6/13/11 12:00 AM	1	1-0343	2	3	2	2	2	2	2	38.8	15.8443	94	14	FALSE	FALSE	FALSE	FALSE	5.86	31.6	136	2.73	2.38	0.46	42.3	41	19	92	2	<LOD	2	2	2	0	0
6/14/11 12:00 AM	1	1-0344	2	2	2	2	1	2	2	38.7	14.7161	76	8.5	TRUE	FALSE	FALSE	FALSE	8.72	33.7	212	3.67	4.23	0.76	45.2	34	13	52	2	<LOD	2	2	2	0	0
6/15/11 12:00 AM	1	1-0345	2	5	1	2	2	2	2	38.5	9.19118	136	17	FALSE	FALSE	FALSE	FALSE	7.21	37.7	247	5.58	1.03	0.57	48.3	34	8	92	2	<LOD	2	2	2	0	2
6/15/11 12:00 AM	1	1-0346	1	10	2	2	2	2	2	38.6	14.5431	146	31	FALSE	FALSE	TRUE	TRUE	3.32	38.6	120	2.05	1.1	0.15	42.3	35	10	76	2	<LOD	2	2	2	0	0
6/15/11 12:00 AM	1	1-0347	2	12	1	2	1	2	1	38.7	15.7651	149	35	FALSE	FALSE	FALSE	FALSE	1.72	39.8	119	0.8	0.71	0.16	45.3	59	25	317	1	1		1	2	0	0
6/15/11 12:00 AM	1	1-0348	2	1	2	2	2	2	2	37.8	16.3966	72	8.5	FALSE	FALSE	FALSE	FALSE	18.39	36.5	238	7.32	9.71	1.25	45.7	34	14	91	2	<LOD	2	2	2	0	0
6/15/11 12:00 AM	1	1-0349	2	1	2	2	2	2	2	38.8	19.7959	70	9.7	FALSE	FALSE	FALSE	FALSE	9.84	35.3	258	5.05	4.06	0.71	47.3	36	16	194	2	<LOD	2	2	2	0	0
6/15/11 12:00 AM	1	1-0350	2	12	2	2	1	2	2	38.2	21.4903	151	49	FALSE	FALSE	FALSE	FALSE	8.64	44.2	228	6.2	1.62	0.78	45.8	23	12	105	2	<LOD	2	2	2	0	0
6/15/11 12:00 AM	1	1-0351	1	6	2	2	2	2	2	38.5	16.5949	119	23.5	FALSE	FALSE	FALSE	FALSE	20.09	32.3	369	14.77	4.08	1.14	46.3	26	9	86	2	<LOD	2	2	2	0	0
6/15/11 12:00 AM	1	1-0352	1	11	3	2	2	2	2	38.8	21.3593	153	50	FALSE	FALSE	FALSE	FALSE	2.63	36.2	139	1.71	0.57	0.33	41.8	43	32	85	1	4		2	1	2	1
6/16/11 12:00 AM	1	1-0353	1	9	1	1	2	2	2	39	14.7929	130	25	FALSE	FALSE	FALSE	FALSE	3.2	39.1	194	2.26	0.62	0.32	45.7	38	16	134	1	1		1	2	0	0
6/16/11 12:00 AM	1	1-0354	2	2	1	2	2	2	2	38.3	16.4366	78	10	FALSE	FALSE	FALSE	FALSE	7.94	33.1	170	5.32	1.9	0.67	44.1	49	38	155	2	<LOD	2	2	2	0	0
6/17/11 12:00 AM	1	1-0355	1	4	2	1	2	1	1	38.2	9.66112	116	13	TRUE	FALSE	FALSE	FALSE	6.67	34.7	165	2.14	4.2	0.28	41.8	52	12	112	2	<LOD	2	2	2	0	0
6/17/11 12:00 AM	1	1-0356	2	4	1	2	2	2	2	38	15.8443	94	14	FALSE	FALSE	FALSE	FALSE	11.12	36.8	279	9.01	1.14	0.8	45	42	14	65	2	<LOD	2	2	2	0	0
6/17/11 12:00 AM	1	1-0357	2	6	2	2	2	2	2	37.9	14.8633	116	20	FALSE	FALSE	FALSE	FALSE	13.1	36.7	183	10.9	1.67	0.51	41.4	33	8	74	2	<LOD	2	2	2	0	0
6/17/11 12:00 AM	1	1-0358	2	5	1	1	2	1	2	38.5	14.876	110	18	TRUE	FALSE	FALSE	FALSE	20.31	37	298	16.22	2.47	1.57	43.8	38	16	75	2	<LOD	2	2	2	0	0
6/17/11 12:00 AM	1	1-0359	2	5	2	1	2	1	1	38.5	11.9579	112	15	FALSE	FALSE	FALSE	FALSE	21.34	36.5	333	17.09	3.02	1.17	45.9	31	11	54	2	<LOD	2	2	2	0	0
6/17/11 12:00 AM	1	1-0360	2	5	1	2	2	2	2	38	14.5748	108	17	FALSE	FALSE	FALSE	FALSE	21.6	38.8	182	16.92	3.33	1.27	42.5	37	22	41	2	<LOD	2	2	2	0	0
6/20/11 12:00 AM	1	1-0361	2	3	2	2	2	1	2	39	17.7221	92	15	TRUE	FALSE	FALSE	FALSE	13.38	35.3	319	5.32	7.02	0.82	47.1	28	11	55	2	<LOD	2	2	2	0	0
6/20/11 12:00 AM	1	1-0362	2	2	3	2	2	2	2	38.8	12.4948	98	12	FALSE	FALSE	FALSE	FALSE	4.33	35.1	112	0.6	3.46	0.26	46.1	53	14	85	1	1		1	2	0	0
6/20/11 12:00 AM	1	1-0363	1	3	1	2	2	2	2	38.9	16.631	99	16.3	FALSE	FALSE	FALSE	FALSE	9.23	36.7	111	8.13	0.61	0.45	50.4	35	20	75	2	<LOD	2	2	2	0	0
6/22/11 12:00 AM	1	1-0364	2	2	1	1	1	2	2	38.3	15.9675	83	11	FALSE	FALSE	FALSE	FALSE	17.26	38.4	345	11.34	4.53	1.36	52.5	45	18	169	2	<LOD	2	2	2	0	0
6/22/11 12:00 AM	1	1-0365	1	7	1	1	1	2	2	38	14.08	125	22	FALSE	FALSE	FALSE	FALSE	7.78	37.5	186	5.49	1.79	0.5	43.5	32	6	79	2	<LOD	2	2	2	0	0
6/22/11 12:00 AM	1	1-0366	1	8	2	2	1	2	2	38.7	19.1857	124	29.5	FALSE	FALSE	FALSE	FALSE	6.3	36.8	286	3.56	2.38	0.34	48.1	31	18	77	2	<LOD	2	2	2	0	0
6/23/11 12:00 AM	1	1-0367	2	3	2	1	2	2	2	38.6	13.2964	95	12	TRUE	FALSE	FALSE	FALSE	6.6	34.3	199	2.41	3.6	0.57	45	74	34	182	2	<LOD	2	2	2	0	0
6/23/11 12:00 AM	1	1-0368	1	3	2	2	2	2	2	38.8	15.0948	91	12.5	FALSE	FALSE	FALSE	FALSE	22.79	41.1	435	19.7	2.5	0.58	50.1	37	8	45	2	<LOD	2	2	2	0	0
6/23/11 12:00 AM	1	1-0369	2	12	1	2	1	2	2	38	19.6167	141	39	FALSE	FALSE	FALSE	FALSE	9.15	36.3	244	6.49	1.79	0.8	46.8	24	11	174	2	<LOD	2	2	2	0	0
6/23/11 12:00 AM	1	1-0370	1	3	1	1	2	1	2	39.1	14.4044	95	13	TRUE	FALSE	FALSE	FALSE	17.45	31.8	576	10.9	4.56	1.64	43.1	27	9	66	1	1		2	1	1	2
6/23/11 12:00 AM	1	1-0371	1	4	2	1	2	2	2	39	12.0146	102	12.5	TRUE	FALSE	FALSE	FALSE	8.7	33.8	287	4.56	3.34	0.73	47.8	40	12	231	2	<LOD	2	2	2	0	0
6/24/11 12:00 AM	1	1-0372	1	11	2	2	2	1	1	37.8	14.2687	145	30	TRUE	FALSE	FALSE	FALSE	2.63	38.6	169	1.56	0.86	0.21	45.4	49	14	102	1	2		2	2	0	0
6/24/11 12:00 AM	1	1-0373	2	8	2	1	1	2	2	38.8	18.56	125	29	TRUE	FALSE	FALSE	FALSE	5.08	37.5	164	3.09	1.6	0.39	45.5	66	43	54	1	2		1	1	2	3
6/24/11 12:00 AM	1	1-0374	1	2	1	1	2	2	2	38.5	19.3698	88	15	TRUE	FALSE	TRUE	FALSE	11.47	34.8	250	7.1	3.31	0.88	48.5	38	25	181	2	<LOD	2	2	2	0	0
6/27/11 12:00 AM	1	1-0375	1	7	1	1	2	2	1	38.7	13.9852	131	24	FALSE	FALSE	FALSE	FALSE	19.13	36.6	326	15.05	2.41	1.32	46	36	23	99	2	<LOD	2	2	2	0	0
6/29/11 12:00 AM	1	1-0376	2	6	1	2	2	2	2	38.8	10.2452	121	15	FALSE	FALSE	FALSE	FALSE	4.48	36.8	180	0.84	3.25	0.36	46.4	49	12	92	2	<LOD	2	2	2	0	0
6/29/11 12:00 AM	1	1-0377	2	2	3	2	2	2	2	37.8	16.5406	92	14	FALSE	FALSE	FALSE	FALSE	13.4	36.8	312	4.92	7.41	0.98	43.1	33	14	74	2	<LOD	2	2	2	0	0
6/29/11 12:00 AM	1	1-0378	2	11	3	2	1	2	2	38	14.2857	140	28	FALSE	FALSE	FALSE	FALSE	3.41	36.7	183	1.94	1.19	0.27	44.1	33	16	68	1	1		1	2	0	0
6/30/11 12:00 AM	1	1-0379	2	2	2	2	2	2	2	38.4	13.8408	85	10	FALSE	FALSE	FALSE	FALSE	20.03	31.3	373	15.17	3.59	1.26	44.2	39	13	92	2	<LOD	2	2	2	0	2
6/30/11 12:00 AM	1	1-0380	1	3	3	2	2	2	2	38.5	19.6555	93	17	FALSE	FALSE	FALSE	FALSE	4.54	40.6	169	1.86	2.22	0.44	40.6	67	29	94	1	1		1	1	2	1
6/30/11 12:00 AM	1	1-0381	1	9	3	2	2	2	2	38.9	18.8606	124	29	FALSE	FALSE	FALSE	FALSE	9.74	31.6	234	6.17	2.7	0.79	45.5	27	16	73	2	<LOD	2	2	2	0	0
6/30/11 12:00 AM	1	1-0382	2	14	3	1	2	2	1	38.5	16.2331	153	38	FALSE	FALSE	FALSE	FALSE	1.91	37.6	78	1.06	0.76	0.08	47.1	128	55	534	1	1		1	1	2	1
6/30/11 12:00 AM	1	1-0383	2	5	2	2	2	2	2	38	17.6453	101	18	FALSE	FALSE	FALSE	FALSE	4	34.2	187	2.89	0.79	0.32	49	45	14	101	1	4		1	2	0	0
6/30/11 12:00 AM	1	1-0384	1	12	2	2	2	2	1	39	19.6283	158	49	FALSE	FALSE	FALSE	FALSE	4.88	41.4	199	4	0.44	0.44	50.1	31	20	69	2	<LOD	2	2	2	0	2
6/30/11 12:00 AM	1	1-0385	2	7	3	1	2	2	2	38.9	15.2588	128	25	FALSE	FALSE	FALSE	FALSE	9.77	36.1	253	5.38	3.64	0.72	46.8	34.8	50.1	105	2	<LOD	2	2	2	0	0
2011-01-07	1	1-0386	1	13	3	1	2	2	2	38	19.563	155	47	FALSE	FALSE	FALSE	FALSE	2.29	43.1	130	1.41	0.6	0.27	45.7	40	26	162	1	2		1	2	0	0
2011-01-07	1	1-0387	1	2	2	1	2	2	2	38.5	18.0785	88	14	TRUE	FALSE	TRUE	FALSE	7.21	35.8	205	3.51	3.13	0.56	36.5	59	27	71	1	1		1	2	0	0
2011-01-07	1	1-0388	2	3	2	2	2	2	2	38.7	15.6185	98	15	TRUE	FALSE	FALSE	FALSE	5.84	35.7	305	2.7	2.8	0.32	44.6	38	16	67	2	<LOD	2	2	2	0	0
2011-01-07	1	1-0389	2	2	2	2	2	2	2	38.6	16.4366	78	10	TRUE	FALSE	TRUE	FALSE	9.34	36	199	3.19	5.51	0.53	46.1	55	18	48	2	<LOD	2	2	2	0	0
2011-01-07	1	1-0390	2	4	2	2	2	2	2	38	20.4061	99	20	TRUE	FALSE	FALSE	FALSE	19.15	36.2	217	10.73	6.02	2.09	46	30	21	18	2	<LOD	2	2	2	0	0
2011-01-07	1	1-0391	1	1	2	2	2	2	2	37.8	19.8373	71	10	TRUE	FALSE	TRUE	FALSE	13.77	36.3	254	3.26	9.41	1.03	47.6	43	29	258	2	<LOD	2	2	2	0	0
2011-01-07	1	1-0392	2	2	2	2	2	2	2	38.7	17.4329	88	13.5	TRUE	FALSE	FALSE	FALSE	9.63	30.9	422	5.51	2.72	1.05	39.6	37	15	67	2	<LOD	2	2	2	0	0
2011-04-07	1	1-0393	1	3	2	2	2	2	2	38.6	15.3046	99	15	TRUE	FALSE	FALSE	FALSE	7.72	33.5	266	2.29	5.05	0.29	45	43	14	176	2	<LOD	2	2	2	0	0
2011-04-07	1	1-0394	2	3	3	2	2	2	2	38	15.8025	90	12.8	TRUE	FALSE	TRUE	FALSE	5.85	31.3	264	3.41	1.78	0.5	44.4	46	23	85	2	<LOD	2	2	2	0	0
2011-05-07	1	1-0395	2	7	2	1	1	2	2	38.6	12.7551	112	16	TRUE	FALSE	FALSE	FALSE	4.04	39.1	147	2.27	1.24	0.51	47.7	100	62	101	1	2		1	1	2	1
2011-05-07	1	1-0396	2	2	2	2	2	2	2	38.7	10.8167	86	8	FALSE	FALSE	FALSE	FALSE	10.85	34.8	273	5.59	4.67	0.59	45.5	45	18	45	2	<LOD	2	2	2	0	0
2011-05-07	1	1-0397	1	7	2	2	2	2	2	37.8	14.3495	112	18	TRUE	FALSE	FALSE	FALSE	7.13	39.4	190	3.55	3.01	0.55	49.6	38	18	98	2	<LOD	2	2	2	0	2
2011-06-07	1	1-0398	2	3	3	2	2	2	2	39	16.7872	88	13	FALSE	FALSE	FALSE	FALSE	3.73	34	166	1.47	1.87	0.36	46.3	37	11	83	1	2		2	2	0	0
2011-06-07	1	1-0399	1	3	2	2	2	2	2	38.7	17.284	90	14	FALSE	FALSE	FALSE	FALSE	8.37	35.4	253	3.42	4	0.41	43.2	37	14	135	2	<LOD	2	2	2	0	0
2011-07-07	1	1-0400	1	3	2	2	2	2	2	39	16	100	16	FALSE	FALSE	FALSE	FALSE	11.61	38.1	309	6.08	3.79	1.71	48	29	8	30	2	<LOD	2	2	2	0	0
2011-07-07	1	1-0401	1	10	2	2	2	2	2	38.5	17.5974	139	34	FALSE	FALSE	FALSE	FALSE	3.54	37.1	237	2.36	0.77	0.41	45.9	36	14	139	1	3		1	2	0	0
2011-07-07	1	1-0402	2	7	3	2	2	2	2	37.8	12.207	128	20	FALSE	FALSE	FALSE	FALSE	9.42	36.8	289	6.34	2.29	0.74	48.3	30	7	125	2	<LOD	2	2	2	0	2
2011-07-07	1	1-0403	1	5	1	2	1	2	2	38.8	23.5649	103	25	FALSE	FALSE	FALSE	FALSE	5.58	36.7	234	4.17	0.93	0.48	48.7	31	10	43	2	<LOD	2	2	2	0	0
2011-07-07	1	1-0404	1	5	1	2	2	2	2	38.6	17.3554	110	21	FALSE	FALSE	FALSE	FALSE	17.29	40.4	335	13.69	2.37	1.19	45.8	26	14	35	2	<LOD	2	2	2	0	0
2011-08-07	1	1-0405	2	4	3	2	2	2	1	38.8	12.6338	116	17	FALSE	FALSE	FALSE	FALSE	5.13	36.4	145	3.12	1.64	0.34	45.4	44	13	105	1	<LOD	1	2	2	0	0
2011-08-07	1	1-0406	1	8	3	1	1	2	1	37.6	22.583	128	37	FALSE	FALSE	FALSE	FALSE	8.65	52	29	3.69	4.27	0.67	37.7	302	214	55	1	2		2	1	2	1
2011-11-07	1	1-0407	1	9	2	2	2	2	2	38.5	15.6629	113	20	TRUE	FALSE	FALSE	FALSE	8.79	40.1	235	5.07	2.83	0.4	47.5	40	22	103	2	<LOD	2	2	2	0	0
2011-11-07	1	1-0408	2	2	2	2	2	2	2	38.2	15.7313	84	11.1	TRUE	FALSE	FALSE	FALSE	13.51	34.5	336	7.42	4.99	0.94	43.4	36	15	102	2	<LOD	2	2	2	0	0
2011-11-07	1	1-0409	1	2	2	1	2	2	2	38.4	14.1285	82	9.5	TRUE	FALSE	TRUE	FALSE	9.75	35.5	154	3.95	5.05	0.71	47	51	19	91	2	<LOD	2	2	2	0	0
2011-11-07	1	1-0410	1	2	3	2	2	2	2	38.7	12.6247	89	10	TRUE	FALSE	FALSE	FALSE	13.23	38.5	312	6.51	5.45	1.13	46.9	39	24	118	2	<LOD	2	2	2	0	0
2011-11-07	1	1-0411	2	9	3	2	2	2	2	38.6	16	150	36	TRUE	FALSE	FALSE	FALSE	3.08	39.4	152	1.84	0.93	0.29	47	61	56	129	1	1		1	1	1	1
2011-11-07	1	1-0412	1	9	3	1	2	2	2	38.3	16.568	130	28	TRUE	FALSE	FALSE	FALSE	3.4	37.2	168	1.47	1.75	0.17	43.9	86	43	77	1	2		2	1	2	1
2011-11-07	1	1-0413	1	4	2	2	2	2	2	38.3	14.5833	120	21	FALSE	FALSE	FALSE	FALSE	7.37	32.2	267	4.1	2.48	0.75	45.6	24	13	71	2	<LOD	2	2	2	0	0
2011-12-07	1	1-0414	2	3	2	2	2	2	2	37.7	11.9527	121	17.5	TRUE	FALSE	FALSE	FALSE	7.72	36.4	208	4.12	2.77	0.61	45.1	35	12	110	2	<LOD	2	2	2	0	0
2011-12-07	1	1-0415	2	1	2	2	2	2	2	38.5	17.8536	71	9	FALSE	FALSE	FALSE	FALSE	6.77	32.4	206	2.78	3.62	0.36	47.8	68	38	169	2	<LOD	2	2	2	0	0
2011-12-07	1	1-0416	1	2	3	2	2	2	2	38.4	16.0494	90	13	TRUE	FALSE	FALSE	FALSE	9.24	33.4	251	4.27	4.21	0.55	44.3	36	18	137	2	<LOD	2	2	2	0	0
2011-12-07	1	1-0417	2	2	2	2	2	2	2	38	15.7808	89	12.5	TRUE	FALSE	FALSE	FALSE	18.28	32.3	290	7.68	8.64	1.87	45.1	36	14	81	2	<LOD	2	2	2	0	0
2011-12-07	1	1-0418	1	14	3	2	1	2	2	38.5	25	160	64	TRUE	FALSE	FALSE	TRUE	6.22	43.4	173	4.44	1.19	0.57	49.9	43	31	80	1	4		1	1	2	1
7/13/11 12:00 AM	1	1-0419	1	1	2	2	2	2	2	38.2	20.3125	80	13	FALSE	FALSE	FALSE	FALSE	14.68	35.5	190	7.05	6.16	1.32	42	35	15	72	2	<LOD	2	2	2	0	0
7/13/11 12:00 AM	1	1-0420	1	6	2	2	2	2	2	38.3	15.5356	119	22	TRUE	FALSE	FALSE	FALSE	6.09	38.2	292	2.29	2.99	0.74	44.9	51	19	77	2	<LOD	2	2	2	0	0
7/13/11 12:00 AM	1	1-0421	1	4	2	1	2	2	2	38.2	16.3249	99	16	TRUE	FALSE	FALSE	FALSE	12.28	34.8	245	7.58	4	0.69	46.6	45	19	165	2	<LOD	2	2	2	0	0
7/14/11 12:00 AM	1	1-0422	2	8	1	2	2	2	2	38.7	14.0018	121	20.5	TRUE	FALSE	FALSE	FALSE	10.6	38.4	240	7.54	2.47	0.58	47.1	49	26	66	1	2		2	2	0	0
7/14/11 12:00 AM	1	1-0423	2	10	2	2	2	2	2	37.9	15.5	127	25	TRUE	FALSE	FALSE	FALSE	3.54	39.8	167	2.4	0.86	0.26	50.4	42	15	66	1	1		1	2	0	0
7/14/11 12:00 AM	1	1-0424	2	3	2	2	2	2	2	38.7	14.7125	94	13	TRUE	FALSE	TRUE	TRUE	12.05	36.1	261	4.22	6.86	0.61	41.9	44	17	97	2	<LOD	2	2	2	0	0
7/14/11 12:00 AM	1	1-0425	1	2	3	2	2	1	2	39	15.2249	85	11	TRUE	FALSE	FALSE	FALSE	6.8	34.8	147	2.6	3.72	0.39	49.3	47	19	105	2	<LOD	2	2	2	0	0
7/15/11 12:00 AM	1	1-0426	1	3	1	2	2	2	2	38.6	20.6612	88	16	FALSE	FALSE	FALSE	FALSE	12.1	38.9	303	7.96	3.51	0.52					2	<LOD	2	2	2	0	2
7/15/11 12:00 AM	1	1-0427	1	13	3	2	2	2	1	38	16.4237	158	41	FALSE	FALSE	FALSE	FALSE	22.57	39.5	177	20.49	0.96	0.41	44.2	38	12	82	2	<LOD	2	2	2	0	0
7/15/11 12:00 AM	1	1-0428	2	3	2	2	2	2	2	39.5	17.3611	96	16	FALSE	FALSE	FALSE	FALSE	16.89	31.6	201	12.96	2.65	1.26	49.3	33	15	93	1	2		2	1	1	3
7/18/11 12:00 AM	1	1-0429	2	8	2	2	2	2	2	38.2	19.898	140	39	FALSE	FALSE	FALSE	TRUE	9.47	37.8	247	6.48	2.08	0.76	48.1	36	17	68	2	<LOD	2	2	2	0	0
7/18/11 12:00 AM	1	1-0430	1	3	3	2	2	2	1	38.4	12.4783	96	11.5	FALSE	FALSE	TRUE	FALSE	5.24	37.1	213	2.81	1.94	0.43	45.7	48	16	115	2	<LOD	2	2	2	0	0
7/18/11 12:00 AM	1	1-0431	1	4	2	2	1	2	2	38.6	15.6629	113	20	FALSE	FALSE	TRUE	TRUE	5.28	38.9	229	2.4	2.37	0.45	46.4	40	18	133	1	1		1	2	0	0
7/18/11 12:00 AM	1	1-0432	1	3	2	2	2	2	2	38.5	15.5	100	15.5	FALSE	FALSE	TRUE	FALSE	5.86	34.3	264	2.26	3.13	0.43	45.4	42	9	159	2	<LOD	2	2	2	0	2
7/18/11 12:00 AM	1	1-0433	1	2	1	2	2	2	2	38.7	16.7657	81	11	FALSE	FALSE	FALSE	FALSE	14.19	36.8	246	7.06	5.82	1.17	45.5	34	21	95	2	<LOD	2	2	2	0	0
7/18/11 12:00 AM	1	1-0434	2	3	3	2	2	2	2	38	19.2234	102	20	FALSE	FALSE	FALSE	FALSE	3.59	35.5	200	0.68	2.51	0.34	44	31	15	98	1	2		2	2	0	0
7/19/11 12:00 AM	1	1-0435	2	1	2	1	2	1	2	39	16.8032	69	8	TRUE	FALSE	FALSE	FALSE	18.27	33	216	12.71	3.68	1.82	40.1	36	9	29	2	<LOD	2	2	2	0	2
7/20/11 12:00 AM	1	1-0436	2	9	3	2	2	2	2	38.6	14.2012	130	24	FALSE	FALSE	FALSE	FALSE	15.61	35.7	218	11.55	2.86	1.17	45.2	27	16	371	2	<LOD	2	2	2	0	0
7/20/11 12:00 AM	1	1-0437	2	1	2	2	2	2	2	38.3	26.8745	61	10	TRUE	FALSE	FALSE	FALSE	17.62	37.8	367	5.09	10.47	2.02	43	59	21	53	1	2		1	2	0	0
7/20/11 12:00 AM	1	1-0438	2	3	2	2	2	2	2	38	17.1875	80	11	TRUE	FALSE	FALSE	FALSE	10.33	34	203	5.07	4.54	0.59	45.8	31	12	149	2	<LOD	2	2	2	0	0
7/20/11 12:00 AM	1	1-0439	1	2	2	2	2	2	2	38.4	15.8443	94	14	TRUE	FALSE	TRUE	FALSE	7.17	38.9	201	3.4	2.81	0.77	47.7	37	20	63	2	<LOD	2	2	2	0	0
7/20/11 12:00 AM	1	1-0440	1	4	2	2	2	2	2	38.4	14.7929	104	16	FALSE	FALSE	TRUE	FALSE	11.1	34.7	263	3.75	6.27	0.66	44.1	40	17	114	2	<LOD	2	2	2	0	0
7/21/11 12:00 AM	1	1-0441	1	3	2	1	2	2	2	38.3	12.1401	93	10.5	FALSE	FALSE	TRUE	FALSE	9.08	35.3	220	2.58	5.65	0.81	49.3	63	24	144	2	<LOD	2	2	2	0	0
7/21/11 12:00 AM	1	1-0442	1	5	2	2	2	2	2	38.2	14.876	110	18	FALSE	FALSE	FALSE	FALSE	8.98	39.6	362	4.52	3.43	0.94	42.1	32	16	56	1	2		2	1	1	1
7/21/11 12:00 AM	1	1-0443	2	11	2	2	2	1	1	38.8	19.3414	142	39	FALSE	FALSE	TRUE	TRUE	2.88	38	163	0.95	1.71	0.16	48	31	10	94	1	2		2	2	0	0
7/22/11 12:00 AM	1	1-0444	1	11	3	2	2	2	1	38.8	19.6677	139	38	FALSE	FALSE	FALSE	FALSE	4.89	41.4	141	3.02	1.48	0.38	47	125	90	93	1	2		1	1	2	2
7/22/11 12:00 AM	1	1-0445	2	4	2	2	2	2	2	38.5	17.6453	101	18	FALSE	FALSE	TRUE	FALSE	4.6	37.7	209	1.09	3.04	0.37	47	46	20	659	2	<LOD	2	2	2	0	0
7/25/11 12:00 AM	1	1-0446	2	2	2	2	2	2	1	38.8	14.5159	83	10	TRUE	FALSE	TRUE	FALSE	3.65	40.8	76	1.11	2.19	0.23	46.6	76	19	100	1	<LOD	1	1	1	1	1
7/25/11 12:00 AM	1	1-0447	2	2	1	2	2	2	2	38	11.856	95	10.7	FALSE	FALSE	FALSE	FALSE	13.27	31.6	424	6.13	5.68	1.39	42.3	38	18	42	2	<LOD	2	2	2	0	2
7/25/11 12:00 AM	1	1-0448	1	10	2	2	2	2	2	38.6	15.2279	138	29	TRUE	FALSE	FALSE	FALSE	10.65	37.4	276	8.63	1.08	0.93	47.6	32	6	77	2	<LOD	2	2	2	0	0
7/25/11 12:00 AM	1	1-0449	1	4	2	2	2	2	2	38.2	18.5185	90	15	FALSE	FALSE	FALSE	FALSE	11.52	34.9	208	7.26	3.16	0.77	48.7	46	9	103	1	1		1	2	0	0
7/25/11 12:00 AM	1	1-0450	1	5	3	1	2	2	2	38	19.1358	90	15.5	FALSE	FALSE	FALSE	FALSE	7.85	37.5	146	2.76	4.22	0.64	45.9	54	16	179	2	<LOD	2	2	2	0	0
7/26/11 12:00 AM	1	1-0451	1	13	2	2	2	2	2	38.5	14.7028	138	28	FALSE	FALSE	FALSE	FALSE	4.86	39.4	220	3.15	1.18	0.53	43.6	46	31	49	1	1		1	2	0	0
7/27/11 12:00 AM	1	1-0452	1	9	2	2	1	2	2	38.6	17.2176	132	30	FALSE	FALSE	FALSE	FALSE	3.85	39.7	179	2.46	1.03	0.34	48.1	35	13	81	1	1		1	2	0	0
7/28/11 12:00 AM	1	1-0453	1	7	3	2	2	2	2	39	14.1233	119	20	TRUE	FALSE	FALSE	TRUE	15.73	36.2	188	13.05	1.49	1.18	44.4	69	39	100	1	2		1	1	2	3
7/28/11 12:00 AM	1	1-0454	1	3	2	1	2	2	2	38.8	15.4195	105	17	TRUE	FALSE	FALSE	FALSE	17.61	36.9	223	9.64	6.19	1.73	48.1	41	21	187	2	<LOD	2	2	2	0	2
7/28/11 12:00 AM	1	1-0455	1	4	3	2	2	2	2	38.3	18.4911	104	20	TRUE	FALSE	TRUE	FALSE	6.39	36.2	418	3.27	2.43	0.42	47.2	43	22	129	2	<LOD	2	2	2	0	0
7/28/11 12:00 AM	1	1-0456	2	6	2	2	2	2	1	38.5	17.5383	112	22	FALSE	FALSE	FALSE	FALSE	4.9	40.3	230	2.2	2.24	0.45	48.2	48	35	200	1	2		1	2	0	0
7/29/11 12:00 AM	1	1-0457	1	2	2	1	1	2	2	38.2	17.9931	85	13	FALSE	FALSE	FALSE	FALSE	11.79	36	475	5.49	5.44	0.72	46	30	14	73	2	<LOD	2	2	2	0	0
7/29/11 12:00 AM	1	1-0458	2	4	1	2	2	2	2	38.5	18.1077	94	16	FALSE	FALSE	FALSE	FALSE	13.67	38.2	236	9.95	2.92	0.73	51.5	35	15	167	2	<LOD	2	2	2	0	0
7/29/11 12:00 AM	1	1-0459	1	10	1	2	2	2	2	39	20.9566	156	51	FALSE	FALSE	FALSE	FALSE	12.31	40	285	9.47	1.72	1.03	45	24	19	132	2	<LOD	2	2	2	0	0
2011-02-08	1	1-0460	1	6	2	2	1	2	2	38.6	17.5598	124	27	TRUE	FALSE	FALSE	FALSE	12.19	37.4	119	7.5	3.05	0.83	48.1	36	20	116	2	<LOD	2	2	2	0	0
2011-02-08	1	1-0461	1	3	2	2	1	2	2	38.3	22.6347	94	20	TRUE	FALSE	FALSE	TRUE	14.58	35.3	340	8.89	4.46	1.2	43.4	30	31	69	2	<LOD	2	2	2	0	0
2011-02-08	1	1-0462	1	4	3	2	2	2	2	38.6	16.276	96	15	TRUE	FALSE	FALSE	FALSE	10.57	33.9	436	4.24	5.02	1.17	48.2	40	18	98	2	<LOD	2	2	2	0	0
2011-02-08	1	1-0463	2	3	2	1	2	2	2	38.8	18.8366	95	17	TRUE	FALSE	FALSE	FALSE	9.46	38.5	235	6.12	2.63	0.65	49.2	46	24	148	2	<LOD	2	2	2	0	0
2011-03-08	1	1-0464	1	4	1	2	2	2	2	38	14.0496	110	17	FALSE	FALSE	FALSE	FALSE	8.46	32.8	347	6.94	0.94	0.57	46.6	26	13	58	2	<LOD	2	2	2	0	0
2011-03-08	1	1-0465	1	4	2	2	2	2	2	38.3	9.34496	106	10.5	FALSE	FALSE	FALSE	FALSE	17.37	36.8	339	11.94	4.15	1.19	50.2	36	11	95	2	<LOD	2	2	2	0	0
2011-03-08	1	1-0466	2	9	2	1	2	2	2	39.3	17.2644	134	31	TRUE	FALSE	FALSE	FALSE	18.35	37.1	315	14.58	2.99	0.74	47	37	12	78	2	<LOD	2	2	2	0	0
2011-03-08	1	1-0467	2	11	2	1	1	2	2	39	15.5223	148	34	TRUE	FALSE	FALSE	FALSE	4.43	40.7	137	3.27	0.75	0.41	45.6	45	26	75	1	3		1	1	1	1
2011-04-08	1	1-0468	1	13	2	2	2	2	2	39.2	22.2222	150	50	FALSE	FALSE	FALSE	FALSE	5.01	38.9	164	3.39	1.17	0.33	45.8	113	119	114	1	2		2	1	2	1
2011-04-08	1	1-0469	2	11	3	2	1	2	2	39	17.3611	120	25	TRUE	FALSE	FALSE	FALSE	2.52	39.3	52	0.91	1.39	0.12	37.4	308	118	1354	1	1		1	1	2	1
2011-05-08	1	1-0470	1	4	1	1	2	2	2	38.8	14	100	14	FALSE	FALSE	FALSE	FALSE	8.81	36.2	232	5.95	1.99	0.77	46.9	41	15	117	2	<LOD	2	2	2	0	2
2011-05-08	1	1-0471	1	5	2	1	2	2	1	38.5	20.9877	90	17	FALSE	FALSE	FALSE	FALSE	5.15	37.2	156	2.34	2.09	0.62	48.7	87	42	100	1	3		1	1	1	1
2011-08-08	1	1-0472	2	8	2	2	1	2	2	38.5	16.64	125	26	FALSE	FALSE	FALSE	FALSE	3.47	34.7	153	2.1	1.22	0.13	43.1	28	10	79	1	2		1	1	2	1
2011-08-08	1	1-0473	2	5	2	1	2	1	1	38.7	19	100	19	FALSE	FALSE	FALSE	FALSE	6.69	38	246	4.26	2.05	0.36	47.1	42	19	105	1	1		1	2	0	0
2011-09-08	1	1-0474	2	9	2	2	2	2	2	39.2	15.68	125	24.5	TRUE	FALSE	FALSE	FALSE	5.84	33.8	246	4.62	0.66	0.54	46.6	42	25	79	1	4		1	1	2	1
2011-10-08	1	1-0475	2	2	2	2	2	2	2	38.6	18.3673	70	9	FALSE	FALSE	FALSE	FALSE	9.15	35.6	246	5.36	2.82	0.94	48.2	43	15	43	1	4		1	2	0	0
2011-11-08	1	1-0476	2	10	2	2	2	2	2	38.6	27.9018	112	35	FALSE	FALSE	FALSE	FALSE	7.1	42.1	179	4.14	2.53	0.42	48.6	61	24	91	1	4		1	1	1	2
2011-11-08	1	1-0477	1	5	2	2	1	2	2	38.6	21.4996	122	32	FALSE	FALSE	FALSE	FALSE	9.83	39.9	312	7.09	1.88	0.84	48.2	36	20	119	2	<LOD	2	2	2	0	0
2011-12-08	1	1-0478	1	5	2	2	2	2	2	38.5	14.5833	120	21	FALSE	FALSE	FALSE	FALSE	17.4	34.8	256	14.45	2.03	0.84	40.1	28	5	70	2	<LOD	2	2	2	0	0
2011-12-08	1	1-0479	1	8	1	2	2	2	2	38.2	21.9479	135	40	FALSE	FALSE	FALSE	FALSE	13.95	37.7	361	9.3	3.62	0.74	45.3	38	22	289	2	<LOD	2	2	2	0	0
2011-12-08	1	1-0480	2	7	1	2	1	2	2	37.8	14.1201	116	19	FALSE	FALSE	FALSE	FALSE	3.3	36.6	99	1.76	1.27	0.12	39.5	66	26	199	1	1		1	2	0	0
2011-12-08	1	1-0481	1	5	3	1	2	2	2	38.3	15.4208	111	19	FALSE	FALSE	TRUE	FALSE	12.47	36.6	313	9.2	2.16	0.56	44.7	35	14	71	2	<LOD	2	2	2	0	0
2011-12-08	1	1-0482	2	4	2	1	2	2	2	38.5	11.1474	116	15	FALSE	FALSE	FALSE	FALSE	11.45	35.1	201	8.59	2.08	0.66	43.1	33	13	51	2	<LOD	2	2	2	0	0
2011-12-08	1	1-0483	2	1	2	1	2	2	1	38.7	21.7751	65	9.2	FALSE	FALSE	FALSE	FALSE	9.59	37	134	4.66	4.05	0.68	42.8	50	21	180	2	<LOD	2	2	2	0	0
2011-12-08	1	1-0484	1	14	1	1	2	2	2	39.2	13.9244	148	30.5	FALSE	FALSE	FALSE	FALSE	4.84	38.6	187	3.91	0.58	0.35	46.8	28	10	109	2	<LOD	2	2	2	0	0
8/15/11 12:00 AM	1	1-0485	2	9	2	1	2	2	2	38.4	16.8988	131	29	FALSE	FALSE	FALSE	FALSE	14.77	36.3	251	11.57	2.59	0.54	41.3	22	8	58	2	<LOD	2	2	2	0	0
8/15/11 12:00 AM	1	1-0486	1	4	2	1	2	2	2	38.6	16.976	94	15	FALSE	FALSE	FALSE	FALSE	3.05	35.5	126	1.63	1.15	0.27	40.5	77	47	146	1	2		1	2	0	0
8/15/11 12:00 AM	1	1-0487	1	5	1	1	2	2	2	38.9	17.4499	111	21.5	FALSE	FALSE	FALSE	FALSE	12.63	34.5	267	8.63	3.1	0.86	41.2	28	13	127	2	<LOD	2	2	2	0	0
8/16/11 12:00 AM	1	1-0488	1	3	2	1	2	2	2	39	19.5312	80	12.5	FALSE	FALSE	FALSE	FALSE	10.97	37	403	7.82	2.61	0.5	47.8	40	15	75	2	<LOD	2	2	2	0	2
8/16/11 12:00 AM	1	1-0489	1	7	2	2	2	2	2	37.7	20.8117	93	18	FALSE	FALSE	FALSE	FALSE	3.8	38.1	330	2.14	1.41	0.23	39.7	45	18	111	1	1		1	1	1	2
8/16/11 12:00 AM	1	1-0490	1	13	2	2	2	2	1	38	28.8805	138	55	FALSE	FALSE	FALSE	FALSE	3.23	40.3	192	1.86	0.91	0.44	42.5	66	37	60	1	4		1	2	0	0
8/17/11 12:00 AM	1	1-0491	1	4	1	1	2	2	2	38.5	17	100	17	FALSE	FALSE	FALSE	FALSE	12.39	34.5	234	10.8	0.69	0.89	45.2	52	33	183	2	<LOD	2	2	2	0	0
8/17/11 12:00 AM	1	1-0492	1	9	3	1	2	2	2	38.4	18.115	139	35	TRUE	FALSE	FALSE	TRUE	4.63	39.5	202	3.36	1.02	0.23	40.9	122	32	4188	1	2		1	2	0	0
8/17/11 12:00 AM	1	1-0493	1	7	1	1	1	2	2	39.3	15.2778	120	22	TRUE	FALSE	FALSE	FALSE	10.27	38.3	168	9.56	0.54	0.14	45.4	38	14	154	2	<LOD	2	2	2	0	0
8/18/11 12:00 AM	1	1-0494	1	8	2	2	2	2	2	38.5	14.7929	130	25	TRUE	FALSE	FALSE	FALSE	10.69	34	486	5.72	4.38	0.45	43.1	31	15	89	2	<LOD	2	2	2	0	3
8/18/11 12:00 AM	1	1-0495	1	6	2	1	2	2	2	38.5	14.3495	112	18	TRUE	FALSE	FALSE	FALSE	20.7	34.3	355	14.97	4.21	1.03	44.5	46	22	151	2	<LOD	2	2	2	0	0
8/19/11 12:00 AM	1	1-0496	1	2	2	1	2	2	2	38.7	27.7723	71	14	TRUE	FALSE	FALSE	FALSE	24.39	34.8	356	19.65	3.64	1.09	41.6	37	29	83	2	<LOD	2	2	2	0	0
8/19/11 12:00 AM	1	1-0497	2	3	3	1	2	2	2	38.8	25.2826	82	17	TRUE	FALSE	TRUE	FALSE	5.97	34.8	166	3.92	1.24	0.5	39.4	138	169	89	2	<LOD	2	2	2	0	0
8/22/11 12:00 AM	1	1-0498	1	8	2	2	2	2	2	38.6	28.2779	103	30	FALSE	FALSE	FALSE	TRUE	4.38	34	160	2.08	1.83	0.44	41.8	44	19	98	1	1		1	2	0	0
8/22/11 12:00 AM	1	1-0499	1	11	3	2	2	2	1	38.7	17.602	140	34.5	FALSE	FALSE	FALSE	FALSE	4.47	36.8	180	2.42	1.65	0.29	41.6	34	17	149	2	<LOD	2	2	2	0	0
8/23/11 12:00 AM	1	1-0500	1	14	2	2	2	2	1	39	24.7676	162	65	FALSE	FALSE	FALSE	TRUE	4	39.5	187	2.04	1.55	0.4	44.2	61	77	145	1	2		1	2	0	0
8/24/11 12:00 AM	1	1-0501	2	10	2	2	2	2	2	39	17.7916	132	31	FALSE	FALSE	FALSE	FALSE	8.51	38.1	161	6.75	1.23	0.52	40.8	23	15	83	2	<LOD	2	2	2	0	0
8/24/11 12:00 AM	1	1-0502	2	10	3	1	2	1	1	38.8	15.4959	132	27	TRUE	FALSE	FALSE	TRUE	4.3	42.3	135	2.46	1.46	0.37	40	26	31	124	1	2		2	1	2	1
8/24/11 12:00 AM	1	1-0503	2	7	1	1	2	2	1	39.3	18.0278	129	30	FALSE	FALSE	FALSE	FALSE	4.35	39.9	156	3.21	0.78	0.35	46.9	50	27	100	1	1		1	2	0	1
8/25/11 12:00 AM	1	1-0504	1	10	1	1	1	2	2	38.7	15.2279	138	29	TRUE	FALSE	FALSE	FALSE	8.97	34.3	172	7.77	0.45	0.74	45.7	33	17	99	1	3		1	1	1	2
8/25/11 12:00 AM	1	1-0505	2	10	1	2	2	2	2	38.8	16.7075	134	30	FALSE	FALSE	FALSE	FALSE	7.67	40.3	301	6.4	0.74	0.52	48.2	20	13	76	2	<LOD	2	2	2	0	0
8/25/11 12:00 AM	1	1-0506	2	9	2	2	2	2	2	39.5	15.1172	126	24	FALSE	FALSE	FALSE	FALSE	8.78	36.6	233	6.48	1.8	0.49	46.5	28	16	63	2	<LOD	2	2	2	0	0
8/25/11 12:00 AM	1	1-0507	2	2	2	2	2	2	2	38.6	15.625	80	10	FALSE	FALSE	FALSE	FALSE	16.26	35	348	9.44	5.61	1.16	42.1	38	13	119	2	<LOD	2	2	2	0	0
8/25/11 12:00 AM	1	1-0508	2	6	2	1	1	2	1	38.5	17.3554	110	21	FALSE	FALSE	FALSE	FALSE	3.51	37.4	51	1.86	1.28	0.36	43.4	184	79	129	1	3		2	1	2	1
8/25/11 12:00 AM	1	1-0509	1	8	2	1	1	2	1	38.6	13.6106	115	18	FALSE	FALSE	FALSE	FALSE	4.55	37.1	101	2.86	1.28	0.38	39.4	142	80	135	1	2		1	1	2	1
8/26/11 12:00 AM	1	1-0510	1	14	2	2	2	2	2	38.2	23.634	158	59	FALSE	FALSE	FALSE	FALSE	3.64	42.4	159	1.16	2.06	0.39	40.4	30	17	140	1	2		1	1	1	1
8/26/11 12:00 AM	1	1-0511	1	9	2	2	2	2	1	38.7	29.5858	130	50	FALSE	FALSE	FALSE	FALSE	6.31	36.6	224	4.92	1.01	0.38	41.3	347	309	192	1	2		1	2	0	0
8/29/11 12:00 AM	1	1-0512	1	7	3	1	1	2	1	39.2	17.7515	130	30	FALSE	FALSE	FALSE	FALSE	5.33	38.8	191	2.86	2.26	0.2	44.6	115	68	163	1	2		1	1	2	3
8/29/11 12:00 AM	1	1-0513	1	5	3	2	2	2	2	38.8	15.1502	109	18	FALSE	FALSE	FALSE	FALSE	4.02	36	126	2.05	1.66	0.29	38.9	58	10	115	1	3		1	2	0	0
8/29/11 12:00 AM	1	1-0514	1	12	2	1	2	2	1	39.1	14.2857	140	28	FALSE	FALSE	FALSE	FALSE	3.27	38.5	228	2.11	0.83	0.33	42.3	58	32	101	1	1		1	2	0	0
8/30/11 12:00 AM	1	1-0515	2	7	3	2	2	2	1	38.6	15.5	127	25	FALSE	FALSE	FALSE	TRUE	3.07	37.9	152	1.2	1.57	0.29	43.3	41	13	53	1	2		2	2	0	0
8/30/11 12:00 AM	1	1-0516	1	3	2	2	2	2	2	39	14.4883	99	14.2	FALSE	FALSE	FALSE	FALSE	14.62	31	359	6.84	6.08	1.22	37.2	39	9	102	2	<LOD	2	2	2	0	0
8/31/11 12:00 AM	1	1-0517	1	7	2	2	2	2	2	38.7	15.0231	129	25	FALSE	FALSE	FALSE	TRUE	5.57	39.4	221	3.87	1.45	0.24	45.5	38	14	122	2	<LOD	2	2	2	0	0
8/31/11 12:00 AM	1	1-0518	1	4	2	2	2	2	2	39.3	13	100	13	FALSE	FALSE	FALSE	TRUE	12.78	39.5	296	5.82	6.18	0.73	44.1	174	52	238	1	2		2	2	0	0
8/31/11 12:00 AM	1	1-0519	2	6	1	1	1	2	2	38.7	14.3495	112	18	FALSE	FALSE	FALSE	FALSE	9.14	38.7	274	6.38	1.9	0.84	46.9	40	14	83	2	<LOD	2	2	2	0	0
2011-01-09	1	1-0520	2	3	2	2	2	2	2	38.5	14.0566	98	13.5	FALSE	FALSE	TRUE	FALSE	19.04	36.2	244	13.36	4.25	1.38	45.1	82	115	87	2	<LOD	2	2	2	0	0
2011-01-09	1	1-0521	1	2	1	2	2	2	2	39	18.9619	85	13.7	FALSE	FALSE	FALSE	FALSE	11.97	37.8	241	6.69	4.39	0.84	42.4	44	17	64	2	<LOD	2	2	2	0	0
2011-05-09	1	1-0522	1	3	2	1	2	2	2	38.3	14.1059	96	13	FALSE	FALSE	FALSE	FALSE	3.43	33	157	1.57	1.62	0.23	44.8	42	12	166	2	<LOD	2	2	2	0	0
2011-05-09	1	1-0523	1	3	2	1	1	2	2	38.8	13.8504	95	12.5	FALSE	FALSE	FALSE	FALSE	20	36.7	425	9.96	8.53	1.48	43.8	46	24	146	2	<LOD	2	2	2	0	0
2011-05-09	1	1-0524	2	10	2	1	2	2	1	39	15.1111	150	34	FALSE	FALSE	FALSE	FALSE	3.28	38	232	2.42	0.6	0.25	43.7	36	11	80	1	1		1	1	2	1
2011-06-09	1	1-0525	2	3	2	1	2	2	2	38.6	32.2831	88	25	FALSE	FALSE	FALSE	FALSE	10.33	43.6	269	8.09	1.72	0.51	47	44	24	64	1	<LOD	1	2	2	0	0
2011-06-09	1	1-0526	2	3	2	1	2	2	2	39	18.0785	88	14	FALSE	FALSE	FALSE	FALSE	24.78	36.4	751	19.59	3.98	1.18	44.4	32	12	67	2	<LOD	2	2	2	0	0
2011-07-09	1	1-0527	1	1	1	1	2	2	2	39	18.8149	68	8.7	FALSE	FALSE	FALSE	FALSE	6.38	33	161	3.65	2.32	0.39	45.3	42	17	129	2	<LOD	2	2	2	0	2
2011-07-09	1	1-0528	2	4	2	2	2	2	2	39.5	25.5076	99	25	FALSE	FALSE	FALSE	FALSE	9.9	37.6	283	6.36	2.57	0.92	41.7	32	14	62	2	<LOD	2	2	2	0	0
2011-07-09	1	1-0529	2	4	2	2	2	2	2	38.3	21.5665	101	22	FALSE	FALSE	FALSE	FALSE	10.19	38.8	340	7.35	2.06	0.77	44.5	50	30	96	2	<LOD	2	2	2	0	0
2011-08-09	1	1-0530	2	2	3	2	2	2	2	39.5	18.0802	78	11	FALSE	FALSE	FALSE	FALSE	12.74	33.9	322	6.36	5.73	0.63	44.4	35	13	64	2	<LOD	2	2	2	0	0
2011-09-09	1	1-0531	1	8	3	2	2	2	2	38.7	26.0146	124	40	TRUE	FALSE	FALSE	FALSE	3.06	41.6	86	1.83	1	0.22	43.5	192	105	116	1	1		2	1	2	3
2011-09-09	1	1-0532	1	10	2	1	2	2	2	38.2	14.1777	138	27	TRUE	FALSE	FALSE	FALSE	3.94	37.5	215	3.03	0.49	0.42	46.5	44	23	406	2	<LOD	2	2	2	0	0
2011-09-09	1	1-0533	2	9	3	2	2	2	2	38.8	11.4784	132	20	FALSE	FALSE	FALSE	FALSE	8.86	38.3	323	5.33	3.19	0.33	43.8	40	9	106	2	<LOD	2	2	2	0	2
2011-09-09	1	1-0534	2	6	2	2	1	2	2	38.8	15.6064	116	21	FALSE	FALSE	FALSE	FALSE	14.6	30.6	234	10.61	2.86	1.1	40.5	32	10	74	2	<LOD	2	2	2	0	0
2011-09-09	1	1-0535	1	6	3	1	2	2	2	39	12.2091	118	17	TRUE	FALSE	FALSE	FALSE	7.96	33.2	299	3.99	3.45	0.51	39.3	63	21	120	2	<LOD	2	2	2	0	0
2011-12-09	1	1-0536	1	10	2	1	2	2	2	38.9	17.8571	140	35	TRUE	FALSE	FALSE	FALSE	7.53	39.6	195	4.78	2.01	0.72	48.9	43	27	86	2	<LOD	2	2	2	0	0
2011-12-09	1	1-0537	2	9	2	2	2	2	2	38.5	13.7174	135	25	TRUE	FALSE	FALSE	FALSE	4.69	40.7	172	1.76	2.35	0.58	44.2	31	15	64	1	3		1	2	0	0
9/13/11 12:00 AM	1	1-0538	2	5	1	1	2	2	2	38.8	15.6064	116	21	FALSE	FALSE	FALSE	FALSE	9.09	37.7	214	6.55	1.45	1.08	44.3	32	13	115	2	<LOD	2	2	2	0	0
9/13/11 12:00 AM	1	1-0539	1	2	2	2	2	2	2	39	16.6205	95	15	FALSE	FALSE	FALSE	FALSE	6.37	38	249	3.91	1.81	0.63	42.5	35	17	62	2	<LOD	2	2	2	0	0
9/13/11 12:00 AM	1	1-0540	2	13	3	1	2	2	2	38.6	18.1312	154	43	FALSE	FALSE	FALSE	FALSE	3.05	40.9	166	1.39	1.4	0.25	45.3	36	12	150	2	<LOD	2	2	2	0	0
9/13/11 12:00 AM	1	1-0541	2	2	3	2	2	2	2	39	13.8408	85	10	FALSE	FALSE	FALSE	FALSE	17.86	40.6	186	10.18	6.61	0.98	44.9	41	13	52	2	<LOD	2	2	2	0	2
9/13/11 12:00 AM	1	1-0542	1	2	3	1	2	2	2	38.3	19.8413	84	14	FALSE	FALSE	FALSE	FALSE	5.37	31.6	191	1.77	3.23	0.33	38.1	49	18	131	2	<LOD	2	2	2	0	0
9/14/11 12:00 AM	1	1-0543	2	5	2	2	1	2	2	39	12.8601	108	15	TRUE	FALSE	FALSE	FALSE	3.9	35.2	177	1.68	1.87	0.33	45.7	39	12	89	2	<LOD	2	2	2	0	0
9/14/11 12:00 AM	1	1-0544	1	4	2	2	2	2	2	39.6	15.191	96	14	TRUE	FALSE	FALSE	TRUE	14.76	25.7	578	9.14	4.28	1.29	42.7	37	11	55	2	<LOD	2	2	2	0	0
9/14/11 12:00 AM	1	1-0545	1	8	2	1	1	2	2	38.7	16.3496	116	22	TRUE	FALSE	FALSE	FALSE	4.45	37.4	276	1.78	2.03	0.23	43	33	18	182	2	<LOD	2	2	2	0	0
9/15/11 12:00 AM	1	1-0546	2	3	2	2	1	2	2	38.6	20.3704	90	16.5	TRUE	FALSE	FALSE	FALSE	12.38	36	305	7.17	4.91	0.28	47.5	34	14	55	2	<LOD	2	2	2	0	0
9/15/11 12:00 AM	1	1-0547	1	4	2	1	2	2	2	38.7	17.343	93	15	TRUE	FALSE	FALSE	FALSE	7.47	35	415	2.3	4.2	0.87	40.5	82	42	90	1	1		1	2	0	0
9/15/11 12:00 AM	1	1-0548	1	6	2	1	2	2	2	39	17.5583	135	32	TRUE	FALSE	FALSE	FALSE	5.85	34.6	231	3.5	1.86	0.48	46.4	52	26	111	1	1		1	2	0	0
9/15/11 12:00 AM	1	1-0549	1	3	1	2	1	2	2	38.7	20.5289	91	17	FALSE	FALSE	FALSE	FALSE	14.18	35.6	339	9.93	3.38	0.61	45.5	40	19	135	2	<LOD	2	2	2	0	0
9/15/11 12:00 AM	1	1-0550	2	6	3	1	2	2	2	38.8	12.7551	112	16	FALSE	FALSE	FALSE	FALSE	5.01	34.7	44	1.7	2.8	0.48	37.8	295	69	86	2	<LOD	2	2	2	0	2
9/15/11 12:00 AM	1	1-0551	2	7	1	2	2	2	2	40	15.3846	130	26	TRUE	FALSE	FALSE	TRUE	5.41	33.6	182	4.46	0.69	0.25	46.7	98	43	107	1	2		1	1	1	2
9/16/11 12:00 AM	1	1-0552	1	6	1	2	1	2	2	39	13.6455	118	19	TRUE	FALSE	FALSE	FALSE	5.27	40.1	180	2.37	2.22	0.67	46.6	40	21	75	1	1		1	2	0	0
9/16/11 12:00 AM	1	1-0553	1	2	3	2	2	2	2	38.4	13.5208	86	10	FALSE	FALSE	FALSE	FALSE	6.35	35.1	205	1.83	4.1	0.38	47	48	16	106	1	4		2	2	0	0
9/16/11 12:00 AM	1	1-0554	1	3	3	2	2	2	1	38.6	14.2045	88	11	FALSE	FALSE	FALSE	FALSE	5.79	34.8	170	2.68	2.41	0.66	44.3	66	22	171	1	2		1	2	0	0
9/16/11 12:00 AM	1	1-0555	1	4	1	2	2	2	2	38.8	16.5406	92	14	FALSE	FALSE	FALSE	TRUE	21.59	36.3	399	19.12	1.22	1.15	40.3	33	13	85	2	<LOD	2	2	2	0	0
9/16/11 12:00 AM	1	1-0556	2	5	2	2	2	2	1	39	11.519	116	15.5	FALSE	FALSE	FALSE	FALSE	4.56	34.8	210	1.43	2.2	0.52	41.8	60	19	94	1	2		1	2	0	0
9/16/11 12:00 AM	1	1-0557	1	6	2	2	2	2	2	39.1	20.1092	118	28	FALSE	FALSE	FALSE	TRUE	6.52	36.2	197	4.21	1.69	0.6	43.3	36	21	121	2	<LOD	2	2	2	0	0
9/19/11 12:00 AM	1	1-0558	1	3	2	2	2	2	2	38.6	17.284	90	14	TRUE	FALSE	FALSE	TRUE	9.82	36.4	209	5.37	3.67	0.77	42.9	50	16	152	2	<LOD	2	2	2	0	0
9/19/11 12:00 AM	1	1-0559	1	12	2	2	2	2	2	38.6	17.3484	148	38	TRUE	FALSE	FALSE	FALSE	2.67	42.4	124	0.98	1.39	0.27	44.7	70	41	259	1	2		2	2	0	0
9/20/11 12:00 AM	1	1-0560	1	6	2	2	2	2	2	38.4	17.1468	108	20	TRUE	FALSE	FALSE	FALSE	11.43	38.1	360	5.23	5.62	0.48	45.6	30	15	89	2	<LOD	2	2	2	0	0
9/21/11 12:00 AM	1	1-0561	2	2	2	2	2	2	2	38.7	21.9138	74	12	TRUE	FALSE	FALSE	FALSE	5.65	35.2	212	3.22	1.23	1.19	43.6	43	16	103	2	<LOD	2	2	2	0	0
9/21/11 12:00 AM	1	1-0562	2	2	2	1	2	2	2	39	20.4082	70	10	TRUE	FALSE	FALSE	FALSE	7.04	35.1	201	2.58	3.64	0.79	43	56	24	150	2	<LOD	2	2	2	0	0
9/21/11 12:00 AM	1	1-0563	2	7	1	1	2	2	2	38.8	12.5976	126	20	TRUE	FALSE	FALSE	FALSE	6.38	35	166	5.5	0.45	0.41	46.7	41	16	113	1	2		1	2	0	0
9/21/11 12:00 AM	1	1-0564	2	1	2	1	2	2	2	38.3	25.9516	68	12	TRUE	FALSE	FALSE	FALSE	10.51	36.7	235	1.6	7.96	0.8	46	55	33	99	2	<LOD	2	2	2	0	0
9/21/11 12:00 AM	1	1-0565	2	5	3	1	2	2	2	39	15.3787	102	16	TRUE	FALSE	FALSE	FALSE	5.53	34.4	228	3.63	1.4	0.34	40.4	37	16	221	2	<LOD	2	2	2	0	0
9/21/11 12:00 AM	1	1-0566	2	4	2	1	2	2	2	38	15.6087	93	13.5	TRUE	FALSE	FALSE	FALSE	13.41	35.5	249	7.48	4.47	1.37	38.2	36	10	112	2	<LOD	2	2	2	0	0
9/21/11 12:00 AM	1	1-0567	2	2	3	2	2	2	2	39.2	19.0443	76	11	TRUE	FALSE	FALSE	FALSE	33.3	34.4	401	20.55	10.06	2.35	43.8	41	16	68	2	<LOD	2	2	2	0	0
9/22/11 12:00 AM	1	1-0568	1	5	2	2	2	2	2	38.2	15.6629	113	20	TRUE	FALSE	FALSE	FALSE	11.04	36.4	174	8.79	1.84	0.38	44.3	41	16	90	2	<LOD	2	2	2	0	0
9/22/11 12:00 AM	1	1-0569	1	12	2	2	2	2	2	39.5	22.6003	156	55	FALSE	FALSE	FALSE	TRUE	3.85	41.3	190	2.29	1.28	0.27	45.2	93	65	153	1	1		1	1	2	2
9/22/11 12:00 AM	1	1-0570	2	11	3	2	2	2	1	38.2	12.8419	145	27	FALSE	FALSE	FALSE	FALSE	4.04	40.9	152	2.91	0.85	0.27	40.9	45	16	93	1	1		1	1	1	2
9/26/11 12:00 AM	1	1-0571	1	6	2	2	2	2	2	39	24.7555	91	20.5	FALSE	FALSE	FALSE	TRUE	6.35	35.9	195	4.63	1.15	0.54	44.3	48	19	201	2	<LOD	2	2	2	0	0
9/26/11 12:00 AM	1	1-0572	1	1	3	2	2	2	2	38.6	26.732	67	12	FALSE	FALSE	FALSE	FALSE	6.18	35.7	192	0.61	5.14	0.41	44.7	62	28	225	2	<LOD	2	2	2	0	0
9/26/11 12:00 AM	1	1-0573	1	15	3	1	2	2	2	38.7	18.7305	155	45	FALSE	FALSE	FALSE	FALSE	15.53	42.3	203	13.05	1.73	0.66	41.6	21	8	92	2	<LOD	2	2	2	0	2
9/27/11 12:00 AM	1	1-0574	2	4	3	2	2	2	2	39	18.937	89	15	FALSE	FALSE	FALSE	FALSE	6.98	37	246	4.36	2.17	0.44	40.2	46	18	71	2	<LOD	2	2	2	0	0
9/27/11 12:00 AM	1	1-0575	1	8	3	2	2	2	2	38.8	19.5312	128	32	FALSE	FALSE	FALSE	FALSE	4.75	37.5	158	2.79	1.49	0.44	43	34	16	85	1	3		1	2	0	0
9/27/11 12:00 AM	1	1-0576	2	12	3	2	2	2	2	38.8	18.3432	130	31	FALSE	FALSE	FALSE	FALSE	3.01	38.4	78	1.51	1.17	0.33	42.3	41	15	268	1	3		1	2	0	0
9/27/11 12:00 AM	1	1-0577	2	6	2	2	2	2	2	38.8	23.5649	103	25	FALSE	FALSE	FALSE	FALSE	2.79	39.1	112	0.84	1.71	0.24	39.3	74	27	1389	2	<LOD	2	2	2	0	0
9/28/11 12:00 AM	1	1-0578	1	2	3	2	2	2	2	38.9	21.2191	72	11	FALSE	FALSE	FALSE	TRUE	5.47	39.7	217	1.96	3.19	0.31	40.5	303	162	99	2	<LOD	2	2	2	0	0
9/28/11 12:00 AM	1	1-0579	2	7	2	2	2	2	2	38.7	14.8633	116	20	FALSE	FALSE	FALSE	FALSE	4.53	38.8	299	1.91	2.22	0.35	40.9	39	10	70	2	<LOD	2	2	2	0	0
9/28/11 12:00 AM	1	1-0580	2	3	2	1	2	2	1	39	26.8544	83	18.5	FALSE	FALSE	FALSE	FALSE	13.48	34.9	399	11.18	1.96	0.33	43.8	50	25	185	2	<LOD	2	2	2	0	0
9/29/11 12:00 AM	1	1-0581	1	8	2	2	2	2	2	39	19.8295	123	30	FALSE	FALSE	FALSE	FALSE	23.79	36.8	236	18.87	3.26	1.63	44.2	40	21	171	2	<LOD	2	2	2	0	0
9/29/11 12:00 AM	1	1-0582	2	5	1	2	2	2	2	39.2	22.6223	103	24	FALSE	FALSE	FALSE	FALSE	14.22	40.2	369	10.54	3.1	0.55	49	35	13	112	2	<LOD	2	2	2	0	0
9/30/11 12:00 AM	1	1-0583	2	3	2	1	2	2	2	38.8	14.533	87	11	FALSE	FALSE	FALSE	FALSE	11	38.7	464	6.61	3.9	0.41	45.7	44	13	71	2	<LOD	2	2	2	0	0
9/30/11 12:00 AM	1	1-0584	1	1	2	1	2	2	2	39	25.1953	63	10	TRUE	FALSE	FALSE	FALSE	16.37	35.5	301	8.13	7.12	0.94	46.4	56	28	27	2	<LOD	2	2	2	0	0
9/30/11 12:00 AM	1	1-0585	1	3	1	2	2	2	2	38.7	31.5617	89	25	FALSE	FALSE	FALSE	FALSE	10.3	36.9	212	7.92	1.27	1.07	44	39	27	88	2	<LOD	2	2	2	0	2
9/30/11 12:00 AM	1	1-0586	2	2	1	2	2	2	2	38.7	22.1836	72	11.5	FALSE	FALSE	FALSE	FALSE	11.24	28.5	239	6.46	4.03	0.65	42.9	51	23	117	2	<LOD	2	2	2	0	0
9/30/11 12:00 AM	1	1-0587	1	1	1	2	2	2	2	38.8	21.6263	68	10	FALSE	FALSE	FALSE	FALSE	10.18	27.4	369	5.5	3.38	1.27	38.2	38	15	101	2	<LOD	2	2	2	0	0
9/30/11 12:00 AM	1	1-0588	2	1	1	2	2	2	2	38.6	21.4996	61	8	FALSE	FALSE	FALSE	FALSE	11.72	34.9	302	7.03	3.75	0.73	43.5	38	20	195	2	<LOD	2	2	2	0	2
9/30/11 12:00 AM	1	1-0589	1	1	1	2	2	2	2	38.7	23.4131	62	9	FALSE	FALSE	FALSE	FALSE	10.44	32.6	353	4.34	4.36	1.59	44	34	16	56	2	<LOD	2	2	2	0	0
9/30/11 12:00 AM	1	1-0590	1	4	1	1	2	2	2	39	23.1399	106	26	FALSE	FALSE	FALSE	FALSE	27.97	36.5	293	22.3	3.85	1.81	43.1	34	23	68	2	<LOD	2	2	2	0	0
2011-03-10	1	1-0591	2	8	3	1	2	2	2	38.8	17.0068	126	27	FALSE	FALSE	FALSE	FALSE	7.47	43	221	5.59	1.25	0.59	47	36	14	118	2	<LOD	2	2	2	0	0
2011-04-10	1	1-0592	1	9	3	2	2	2	2	39	25	140	49	FALSE	FALSE	FALSE	FALSE	3.14	40	216	1.55	1.2	0.35	34.1	36	26	85	1	2		1	2	0	0
2011-05-10	1	1-0593	2	9	3	2	1	1	2	37.9	14.1091	122	21	FALSE	FALSE	FALSE	FALSE	2.97	39.8	146	1.58	1.17	0.17	39.9	43	15	53	2	<LOD	2	2	2	0	0
2011-05-10	1	1-0594	2	9	2	2	2	2	2	38.7	13.6576	124	21	FALSE	FALSE	FALSE	FALSE	6.01	36.8	198	2.47	2.74	0.79	44.1	47	11	82	2	<LOD	2	2	2	0	0
2011-05-10	1	1-0595	1	4	2	1	2	2	2	38.8	16.8205	102	17.5	FALSE	FALSE	FALSE	FALSE	9.76	35.2	245	6.17	3.01	0.56	45.9	33	15	66	2	<LOD	2	2	2	0	0
2011-05-10	1	1-0596	2	4	2	1	1	2	2	38.8	17.5666	104	19	FALSE	FALSE	FALSE	FALSE	3.72	34.1	227	2.66	0.81	0.24	45.7	41	17	200	1	3		1	2	0	0
2011-05-10	1	1-0597	1	2	3	1	2	2	2	39	25.5102	70	12.5	FALSE	FALSE	FALSE	FALSE	12.65	33.5	196	5.86	5.55	1.22	44.3	42	35	1103	2	<LOD	2	2	2	0	0
2011-05-10	1	1-0598	1	1	3	2	2	2	2	38.5	30.5176	64	12.5	FALSE	FALSE	FALSE	FALSE	9.46	38.4	121	2.94	5.51	0.99	39.6	46	11	107	2	<LOD	2	2	2	0	0
2011-06-10	1	1-0599	2	8	2	2	2	2	2	39	12.8174	128	21	FALSE	FALSE	FALSE	FALSE	4.63	42.6	161	0.67	3.42	0.53	45.5	59	21	80	2	<LOD	2	2	2	0	0
2011-06-10	1	1-0600	2	4	2	2	2	2	1	38.5	11.3547	107	13	FALSE	FALSE	TRUE	FALSE	5.76	33	257	2.2	3.08	0.41	42	35	11	82	2	<LOD	2	2	2	0	0
2011-07-10	1	1-0601	1	5	3	2	2	2	2	38.5	16.3496	116	22	FALSE	FALSE	FALSE	FALSE	4.05	33.7	172	1.37	2.33	0.28	40.8	54	20	139	2	<LOD	2	2	2	0	0
2011-07-10	1	1-0602	1	5	1	1	2	2	2	39	21.9154	117	30	FALSE	FALSE	FALSE	FALSE	8.69	37.7	284	6.49	1.63	0.55	46.7	89	121	103	2	<LOD	2	2	2	0	0
2011-10-10	1	1-0603	2	6	2	1	2	2	2	38.7	15.8001	118	22	TRUE	FALSE	FALSE	FALSE	3.99	39.2	183	2.33	1.34	0.3	46.5	43	20	94	2	<LOD	2	2	2	0	0
2011-10-10	1	1-0604	1	5	2	2	2	2	1	38.8	15.8636	123	24	FALSE	FALSE	FALSE	FALSE	12.32	40	330	10.25	1.69	0.38	46	36	15	67	2	<LOD	2	2	2	0	0
2011-10-10	1	1-0605	1	7	2	2	2	2	2	39	13.4372	122	20	FALSE	FALSE	FALSE	FALSE	5.22	37	303	2.68	1.83	0.67	42.7	31	17	81	2	<LOD	2	2	2	0	2
2011-11-10	1	1-0606	2	5	2	2	1	1	2	38.8	14.4175	102	15	TRUE	FALSE	FALSE	TRUE	4.58	40.2	182	0.98	3.35	0.23	44.3	51	15	93	2	<LOD	2	2	2	0	0
2011-11-10	1	1-0607	1	12	2	2	2	2	1	38.6	13.6961	148	30	FALSE	FALSE	FALSE	FALSE	4.26	35	110	3.21	0.77	0.27	42	37	15	58	1	1		1	2	0	0
2011-12-10	1	1-0608	1	3	2	2	2	2	2	38.7	20.0851	92	17	FALSE	FALSE	FALSE	FALSE	5.59	37.3	208	1.7	3.25	0.64	44.4	43	19	101	2	<LOD	2	2	2	0	0
10/13/11 12:00 AM	1	1-0609	2	1	1	1	2	2	2	38.5	25.6348	64	10.5	FALSE	FALSE	FALSE	FALSE	10.7	30.7	307	5.97	3.85	0.64	42.7	45	22	63	2	<LOD	2	2	2	0	0
10/13/11 12:00 AM	1	1-0610	2	9	1	2	1	2	2	38.7	16.2197	136	30	FALSE	FALSE	FALSE	FALSE	7.75	38.1	239	6.42	0.66	0.64	45.4	43	13	83	2	<LOD	2	2	2	0	0
10/13/11 12:00 AM	1	1-0611	2	12	2	2	2	2	2	39	21.9138	148	48	FALSE	FALSE	FALSE	FALSE	13.59	37.7	293	8.55	3.51	1.28	47.5	26	16	62	2	<LOD	2	2	2	0	0
10/13/11 12:00 AM	1	1-0612	2	4	2	1	2	2	2	38.8	12.8601	108	15	FALSE	FALSE	FALSE	FALSE	4.83	39.7	161	3.31	0.95	0.57	44.4	95	48	108	2	<LOD	2	2	2	0	0
10/13/11 12:00 AM	1	1-0613	1	11	3	2	2	2	2	39.3	16.4444	150	37	FALSE	FALSE	FALSE	FALSE	11.09	37.4	283	9.43	1.01	0.63	45.7	28	17	87	2	<LOD	2	2	2	0	0
10/13/11 12:00 AM	1	1-0614	2	7	2	2	2	2	2	38.6	18.9349	130	32	FALSE	FALSE	FALSE	FALSE	9.67	37.6	204	6.02	3.06	0.58	46	26	17	69	2	<LOD	2	2	2	0	0
10/13/11 12:00 AM	1	1-0615	1	1	3	2	2	2	2	39	23.1044	69	11	FALSE	FALSE	FALSE	FALSE	23.85	31.8	299	17.12	4.86	1.83	39.1	35	16	97	2	<LOD	2	2	2	0	1
10/14/11 12:00 AM	1	1-0616	1	7	2	1	2	2	2	38.8	18.0903	133	32	TRUE	FALSE	FALSE	FALSE	14.92	36.5	213	12.9	1.39	0.61	43.7	34	18	111	2	<LOD	2	2	2	0	0
10/14/11 12:00 AM	1	1-0617	2	3	2	1	2	2	2	38.7	17.5771	86	13	TRUE	FALSE	FALSE	FALSE	18.34	34.4	350	10.97	6.17	1.16	42.1	30	8	66	2	<LOD	2	2	2	0	0
10/14/11 12:00 AM	1	1-0618	2	7	3	2	2	2	2	39.5	15.1506	131	26	TRUE	FALSE	FALSE	FALSE	9.3	39.5	204	6.5	2	0.8	42.7	34	19	118	2	<LOD	2	2	2	0	0
10/14/11 12:00 AM	1	1-0619	1	10	2	1	2	2	2	39	23.1044	138	44	TRUE	FALSE	FALSE	FALSE	9	41.8	310	5.4	2.6	1	47.6	27	34	81	2	<LOD	2	2	2	0	0
10/17/11 12:00 AM	1	1-0620	1	8	2	2	2	2	2	38.8	18.3824	136	34	FALSE	FALSE	FALSE	FALSE	4.4	37.5	171	2.67	1.15	0.55	45.6	30	13	134	2	<LOD	2	2	2	0	0
10/17/11 12:00 AM	1	1-0621	2	9	3	2	2	1	1	38.5	26.3889	120	38	FALSE	FALSE	FALSE	FALSE	2.39	36.3	49	1.54	0.67	0.18	43.4	79	44	78	1	2		2	1	2	3
10/17/11 12:00 AM	1	1-0622	1	1	3	2	2	2	1	38	22.2767	67	10	FALSE	FALSE	FALSE	FALSE	9.25	39.9	133	3.36	5.18	0.7	43.2	47	15	346	2	<LOD	2	2	2	0	2
10/17/11 12:00 AM	1	1-0623	1	1	3	2	2	2	1	39	21.7751	65	9.2	FALSE	FALSE	FALSE	FALSE	4.71	37.8	78	2.59	1.6	0.51	43.6	53	18	129	2	<LOD	2	2	2	0	2
10/18/11 12:00 AM	1	1-0624	1	10	2	2	2	2	2	38.7	19.8373	142	40	FALSE	FALSE	FALSE	FALSE	10.73	39.6	320	7.38	2.34	0.9	45.2	30	22	85	2	<LOD	2	2	2	0	0
10/19/11 12:00 AM	1	1-0625	2	1	1	2	2	2	2	38.7	25.1953	63	10	FALSE	FALSE	FALSE	FALSE	9.99	33.5	427	2.95	5.81	0.73	40.7	53	26	73	2	<LOD	2	2	2	0	0
10/20/11 12:00 AM	1	1-0626	2	11	2	2	2	2	2	39	18.2615	148	40	FALSE	FALSE	FALSE	FALSE	5.45	39.1	264	4.35	0.83	0.27	45.2	28	12	94	2	<LOD	2	2	2	0	0
10/20/11 12:00 AM	1	1-0627	2	2	3	1	2	2	2	38.9	18.5185	90	15	FALSE	FALSE	FALSE	FALSE	9.44	37.1	146	6.19	2.66	0.47	44.9	59	29	164	2	<LOD	2	2	2	0	0
10/21/11 12:00 AM	1	1-0628	1	1	2	2	2	2	2	38.5	16.4354	74	9	FALSE	FALSE	FALSE	FALSE	8.5	33.5	285	3.81	4.22	0.3	47.2	46	22	115	2	<LOD	2	2	2	0	0
10/21/11 12:00 AM	1	1-0629	1	4	2	1	2	2	2	38.5	18.1818	110	22	FALSE	FALSE	FALSE	FALSE	6.4	35.4	135	2.93	2.88	0.57	43.3	148	100	111	2	<LOD	2	2	2	0	2
10/21/11 12:00 AM	1	1-0630	2	12	2	2	2	2	1	39	13.1573	151	30	FALSE	FALSE	FALSE	FALSE	2.62	38.9	160	1.74	0.8	0.08	41.7	44	23	65	1	2		1	1	2	2
10/21/11 12:00 AM	1	1-0631	2	9	3	2	2	2	2	38.6	17.3469	140	34	FALSE	FALSE	FALSE	FALSE	2.36	38.3	189	1.08	1.09	0.19	42.7	47	18	158	1	4		1	1	2	3
10/24/11 12:00 AM	1	1-0632	2	1	1	1	2	2	2	38.6	17.4191	83	12	FALSE	FALSE	FALSE	FALSE	12.45	36.8	284	8.68	2.71	1.02	46.9	46	22	103	2	<LOD	2	2	2	0	0
10/24/11 12:00 AM	1	1-0633	2	8	3	2	2	2	2	38.8	18.3655	132	32	FALSE	FALSE	FALSE	FALSE	4.54	41.4	235	0.97	3	0.42	45.1	42	18	117	2	<LOD	2	2	2	0	0
10/24/11 12:00 AM	1	1-0634	2	13	3	2	2	2	2	38.7	14.4795	162	38	FALSE	FALSE	FALSE	FALSE	4.27	34.7	170	3.42	0.61	0.22	42.1	33	13	35	1	2		1	2	0	0
10/24/11 12:00 AM	1	1-0635	2	6	1	2	2	2	2	38.8	17.3611	120	25	FALSE	FALSE	FALSE	FALSE	12.48	38.3	262	7.66	4.05	0.72	43	24	13	56	2	<LOD	2	2	2	0	0
10/24/11 12:00 AM	1	1-0636	1	14	3	1	2	2	1	39	16.0256	156	39	FALSE	FALSE	FALSE	FALSE	5.3	42.1	79	3.7	1.2	0.5	42.1	89	64	266	1	2		1	1	2	3
10/25/11 12:00 AM	1	1-0637	2	11	2	2	2	2	2	38.7	15.3061	140	30	FALSE	FALSE	FALSE	FALSE	10.11	39.5	267	6.98	2.28	0.82	48.2	40	12	80	2	<LOD	2	2	2	0	0
10/25/11 12:00 AM	1	1-0638	2	2	3	2	2	2	1	38.9	15.1496	89	12	FALSE	FALSE	FALSE	FALSE	8.2	36.6	167	1.8	5	1.4	43	71	21	507	1	1		1	2	0	0
10/26/11 12:00 AM	1	1-0639	1	4	2	1	2	2	2	38.5	16.7411	112	21	FALSE	FALSE	FALSE	FALSE	7.74	41.8	295	3.72	3.29	0.7	43.7	51	24	163	2	<LOD	2	2	2	0	0
10/26/11 12:00 AM	1	1-0640	2	5	2	1	2	2	2	37.8	14.3637	118	20	FALSE	FALSE	FALSE	FALSE	6.34	34.3	234	3.3	2.26	0.73	42.5	24	13	57	2	<LOD	2	2	2	0	0
10/26/11 12:00 AM	1	1-0641	1	5	2	2	2	2	2	39	18.2622	102	19	TRUE	FALSE	FALSE	TRUE	8.79	31.1	243	5.89	2.42	0.47	43.6	41	16	116	2	<LOD	2	2	2	0	0
10/26/11 12:00 AM	1	1-0642	2	3	3	2	2	2	2	38.8	14.2045	88	11	TRUE	FALSE	FALSE	TRUE	6.77	31.7	185	2.31	4.16	0.3	40.6	49	19	95	2	<LOD	2	2	2	0	2
10/26/11 12:00 AM	1	1-0643	1	6	3	1	2	2	2	38.6	12.207	128	20	FALSE	FALSE	FALSE	FALSE	9.21	35.7	280	5.69	2.97	0.52	50	32	9	67	2	<LOD	2	2	2	0	0
10/26/11 12:00 AM	1	1-0644	1	10	3	2	2	2	2	38.7	12.7551	140	25	TRUE	FALSE	FALSE	FALSE	13.5	36.4	397	9.5	3.1	1	43.3	34	17	87	2	<LOD	2	2	2	0	0
10/27/11 12:00 AM	1	1-0645	2	4	3	1	2	2	2	38.8	15.7025	110	19	FALSE	FALSE	FALSE	FALSE	3.68	41.5	52	1.73	1.66	0.28	40.6	97	29	73	1	2		1	1	2	1
10/27/11 12:00 AM	1	1-0646	1	1	3	2	2	2	2	39	21.2191	72	11	FALSE	FALSE	FALSE	FALSE	10.46	35.3	108	3.94	5.86	0.6	41.8	84	24	70	1	2		2	1	2	1
10/28/11 12:00 AM	1	1-0647	2	5	1	2	2	2	2	39.1	20.8333	120	30	FALSE	FALSE	FALSE	FALSE	10.94	41.1	286	8.69	0.8	1.41	45.4	43	26	59	2	<LOD	2	2	2	0	0
10/28/11 12:00 AM	1	1-0648	2	1	2	2	2	2	2	38.7	25.7778	75	14.5	FALSE	FALSE	FALSE	FALSE	6.07	38.8	239	1.71	3.85	0.49	47.9	56	22	158	2	<LOD	2	2	2	0	0
10/28/11 12:00 AM	1	1-0649	2	2	1	2	2	2	2	39.2	16.4121	89	13	FALSE	FALSE	FALSE	FALSE	8.77	38.6	239	5.75	1.99	1.02	48	51	15	140	2	<LOD	2	2	2	0	0
10/28/11 12:00 AM	1	1-0650	1	7	1	2	2	2	2	38.7	15.7333	131	27	FALSE	FALSE	FALSE	FALSE	7.22	37.9	306	4.78	1.49	0.93	49.4	58	37	186	1	2		1	2	0	0
10/28/11 12:00 AM	1	1-0651	1	1	3	1	2	2	2	38.8	18.5529	77	11	FALSE	FALSE	FALSE	FALSE	7.09	34.1	204	1.71	4.69	0.69	40.5	55	16	78	1	4		1	2	0	0
10/28/11 12:00 AM	1	1-0652	2	11	3	1	2	2	1	38.6	17.1163	149	38	FALSE	FALSE	FALSE	FALSE	2.88	38.6	143	1.58	0.93	0.35	45.1	37	19	82	1	2		2	2	0	0
10/28/11 12:00 AM	1	1-0653	2	1	2	2	2	2	2	38.9	13.3849	82	9	FALSE	FALSE	FALSE	FALSE	10.11	33	218	7.33	2.27	0.5	47.7	57	14	211	2	<LOD	2	2	2	0	0
10/28/11 12:00 AM	1	1-0654	1	2	2	2	2	2	2	38.6	20.5289	91	17	FALSE	FALSE	FALSE	FALSE	11.2	32.7	267	9.11	1.44	0.62	43.5	45	19	146	2	<LOD	2	2	2	0	0
10/28/11 12:00 AM	1	1-0655	2	2	3	2	1	2	2	38.4	17.7221	92	15	FALSE	FALSE	FALSE	FALSE	3.58	38.2	144	0.46	2.87	0.22	43.3	56	29	198	1	<LOD	1	1	2	0	0
10/31/11 12:00 AM	1	1-0656	2	5	2	1	1	2	2	39.1	12.6338	116	17	TRUE	FALSE	FALSE	FALSE	10.58	36.5	225	9.06	0.96	0.54	45.2	44	16	135	2	<LOD	2	2	2	0	0
10/31/11 12:00 AM	1	1-0657	1	2	3	2	2	2	2	38.6	15.4959	88	12	FALSE	FALSE	FALSE	FALSE	21.4	39.1	304	15.23	4.61	1.39	44.1	35	17	94	2	<LOD	2	2	2	0	2
10/31/11 12:00 AM	1	1-0658	2	4	2	2	2	2	2	38.7	16.2324	111	20	TRUE	FALSE	FALSE	FALSE	10.47	36.2	214	5.77	3.78	0.85	44.5	50	15	92	2	<LOD	2	2	2	0	0
10/31/11 12:00 AM	1	1-0659	2	1	3	2	2	2	2	38.8	20.2395	77	12	TRUE	FALSE	FALSE	FALSE	19.89	36.5	338	11.18	7.56	1.01	47.2	38	16	61	2	<LOD	3	2	2	0	0
10/31/11 12:00 AM	1	1-0660	1	5	3	2	2	2	2	38.7	12.8544	115	17	TRUE	FALSE	FALSE	FALSE	7.54	36.2	222	4.45	2.66	0.41	44.3	32	12	122	2	<LOD	2	2	2	0	0
10/31/11 12:00 AM	1	1-0661	1	3	3	1	1	2	2	38.5	17.7285	95	16	FALSE	FALSE	FALSE	FALSE	7.48	34.9	174	2.4	4.41	0.63	40.9	55	28	153	2	<LOD	2	2	2	0	0
10/31/11 12:00 AM	1	1-0662	1	1	2	2	2	2	2	38.8	21.6263	68	10	FALSE	FALSE	FALSE	FALSE	4.49	35.1	148	1.93	1.96	0.58	43.8	39	18	74	2	<LOD	2	2	2	0	2
10/31/11 12:00 AM	1	1-0663	2	12	3	2	2	2	2	38.6	21.2279	155	51	FALSE	FALSE	FALSE	FALSE	2.96	35	83	2.32	0.57	0.07	40.1	125	24	195	1	1		1	1	2	1
10/31/11 12:00 AM	1	1-0664	2	3	3	2	1	2	1	38.6	12.2537	103	13	FALSE	FALSE	FALSE	FALSE	10.8	34	119	1.83	7.88	1.04	42	151	117	80	2	<LOD	2	2	2	0	0
2011-01-11	1	1-0665	1	3	2	2	2	2	2	38.7	9.4518	115	12.5	TRUE	FALSE	FALSE	FALSE	11.31	33.1	294	6.48	3.33	1.4	39.5	44	16	81	2	<LOD	2	2	2	0	0
2011-01-11	1	1-0666	2	5	2	1	2	2	2	38.6	12.0983	115	16	TRUE	FALSE	FALSE	FALSE	7.88	38.3	211	6.77	0.87	0.24	44.7	104	47	117	1	4		1	2	0	0
2011-01-11	1	1-0667	1	4	3	2	2	2	2	39	12.5303	113	16	TRUE	FALSE	FALSE	FALSE	16.38	33.1	390	11.74	3.09	1.34	46.4	37	12	87	2	<LOD	2	2	2	0	0
2011-01-11	1	1-0668	2	2	2	2	2	2	2	38.6	13.8871	89	11	TRUE	FALSE	FALSE	FALSE	6.32	32.2	221	1.9	4.02	0.36	42.1	59	21	84	2	<LOD	2	2	2	0	0
2011-01-11	1	1-0669	2	6	3	1	2	2	2	39	10.0592	130	17	TRUE	FALSE	FALSE	FALSE	7.47	34.2	154	6.61	0.38	0.47	46	49	14	96	1	1		1	2	0	0
2011-01-11	1	1-0670	2	5	2	1	2	2	2	39	13.3769	116	18	TRUE	FALSE	FALSE	FALSE	7.27	35.4	248	4.45	2.13	0.69	42.2	36	13	65	2	<LOD	2	2	2	0	0
2011-01-11	1	1-0671	1	2	3	2	2	2	2	38.7	20.5289	91	17	TRUE	FALSE	TRUE	FALSE	5.1	37.4	195	2.5	2.1	0.5	41.5	43	17	162	1	1		1	2	0	0
2011-02-11	1	1-0672	2	15	1	2	2	2	2	39.5	20.6612	154	49	TRUE	FALSE	FALSE	FALSE	6.3	36.7	204	5.21	0.83	0.23	45.8	35	17	561	1	1		1	1	2	1
2011-02-11	1	1-0673	1	1	2	2	2	2	2	39.1	16.6634	71	8.4	TRUE	FALSE	FALSE	FALSE	10.6	37.5	340	2.9	6.95	0.59	44.1	43	19	117	1	3		1	2	0	0
2011-02-11	1	1-0674	1	11	3	2	2	2	2	38.8	16.6659	151	38	TRUE	FALSE	FALSE	FALSE	5.46	37.6	231	3.6	0.66	1.19	42.7	182	138	126	1	3		1	2	0	0
2011-02-11	1	1-0675	1	2	3	2	2	2	2	38.8	15.6986	91	13	FALSE	FALSE	FALSE	FALSE	10.78	33.9	362	4.83	5.22	0.67	45.7	48	18	143	2	<LOD	2	2	2	0	2
2011-03-11	1	1-0676	1	2	2	2	2	2	2	38.6	12.9962	92	11	TRUE	FALSE	FALSE	FALSE	5.86	31.7	364	3.64	1.6	0.59	43.2	39	10	60	2	<LOD	2	2	2	0	0
2011-03-11	1	1-0677	2	4	2	2	1	2	2	38.6	13.3135	113	17	TRUE	FALSE	FALSE	FALSE	13.43	36.6	341	9.04	3.3	0.96	40.6	34	33	71	2	<LOD	2	2	2	0	0
2011-04-11	1	1-0678	2	9	1	2	2	2	1	38.7	15.5271	139	30	TRUE	FALSE	FALSE	FALSE	8.94	39.5	192	5.79	2.26	0.5	43.7	26	23	60	2	<LOD	2	2	2	0	0
2011-04-11	1	1-0679	2	4	2	1	2	2	2	38.5	17.284	90	14	FALSE	FALSE	FALSE	FALSE	7.72	31.8	214	3.69	3.6	0.4	41.2	63	15	76	1	4		1	2	0	0
2011-04-11	1	1-0680	1	1	2	1	2	2	2	39	32.6992	58	11	TRUE	FALSE	FALSE	FALSE	17.81	34.9	123	9.32	6.2	2.21	43	58	22	216	2	<LOD	2	2	2	0	0
2011-04-11	1	1-0681	2	12	1	2	2	2	2	39	13.9147	154	33	TRUE	FALSE	FALSE	FALSE	5.62	36	189	4.38	0.68	0.53	42.8	39	11	124	1	4		2	2	0	0
2011-04-11	1	1-0682	1	11	1	2	2	2	2	38.7	21.3333	150	48	FALSE	FALSE	FALSE	FALSE	10.85	37.3	297	8.33	1.99	0.46	43.1	40	19	124	1	<LOD	1	2	2	0	0
2011-04-11	1	1-0683	1	4	1	1	2	2	2	38.8	20.2906	111	25	FALSE	FALSE	FALSE	FALSE	8.38	36.6	135	1.83	6.18	0.32	40.9	58	28	99	2	<LOD	2	2	2	0	0
2011-04-11	1	1-0684	1	3	3	2	2	2	2	38.7	12.8601	108	15	FALSE	FALSE	FALSE	FALSE	12.78	34.2	402	9.73	1.62	1.4	41.9	45	26	86	1	2		2	2	0	0
2011-04-11	1	1-0685	2	4	3	2	1	2	2	39	13.3135	113	17	FALSE	FALSE	FALSE	FALSE	5.63	36.8	165	1.18	3.86	0.57	44.6	57	20	122	1	<LOD	1	1	2	0	0
2011-04-11	1	1-0686	2	4	2	1	2	2	2	39.2	13.8504	114	18	FALSE	FALSE	FALSE	FALSE	4.71	32.2	299	1.55	2.49	0.59	43.3	40	13	115	2	<LOD	2	2	2	0	0
2011-07-11	1	1-0687	1	8	2	2	1	2	2	38.7	12.0713	135	22	FALSE	FALSE	FALSE	FALSE	6.32	38.5	206	3.5	2.23	0.37	40.8	65	39	167	2	<LOD	2	2	2	0	0
2011-07-11	1	1-0688	1	3	3	2	1	2	2	38.8	11.157	110	13.5	FALSE	FALSE	FALSE	FALSE	8.47	33.2	199	2.87	5.11	0.37	43.7	50	17	240	2	<LOD	2	2	2	0	0
2011-08-11	1	1-0689	2	3	2	1	1	2	2	38.7	12.3967	110	15	FALSE	FALSE	FALSE	FALSE	7.68	35.6	198	4.06	2.97	0.63	46.1	46	14	81	2	<LOD	2		2	0	2
2011-08-11	1	1-0690	1	6	3	2	1	2	2	38.8	14.7929	130	25	FALSE	FALSE	FALSE	TRUE	7	37.8	307	2.83	3.77	0.37	45.9	43	31	77	2	<LOD	2	2	2	0	0
2011-08-11	1	1-0691	1	5	2	1	2	2	2	38.7	12.0983	115	16	FALSE	FALSE	FALSE	FALSE	7.09	49.8	173	3.66	2.78	0.58	41.8	45	15	161	2	<LOD	2	2	2	0	0
2011-08-11	1	1-0692	1	3	2	2	2	2	2	38.4	12.6252	109	15	FALSE	FALSE	FALSE	FALSE	12.17	36.6	295	4.67	6.44	0.93	44.2	30	13	72	2	<LOD	2	2	2	0	0
2011-09-11	1	1-0693	1	3	2	2	2	2	2	38.7	14.4033	108	16.8	FALSE	FALSE	FALSE	FALSE	9.39	34.6	261	5.08	3.35	0.94	43.1	35	12	108	2	<LOD	2	2	2	0	0
2011-09-11	1	1-0694	1	2	3	2	2	2	2	38.6	15.0948	91	12.5	FALSE	FALSE	FALSE	FALSE	8.32	37.7	269	2.19	5.66	0.46	43.4	42	17	86	2	<LOD	2	2	2	0	0
2011-10-11	1	1-0695	2	3	1	2	2	2	2	39	16.5289	110	20	FALSE	FALSE	FALSE	FALSE	13.51	40.8	186	8.6	4.18	0.67	43.8	38	15	100	2	<LOD	2	2	2	0	0
2011-10-11	1	1-0696	1	7	2	1	2	2	2	39	19.5133	132	34	FALSE	FALSE	FALSE	FALSE	7.38	37.7	183	4.71	2.23	0.43	41.7	48	20	101	2	<LOD	2	2	2	0	0
2011-10-11	1	1-0697	2	4	2	1	2	2	2	38.8	12.1743	111	15	FALSE	FALSE	FALSE	FALSE	10.36	33.7	219	5.03	4.52	0.75	43.6	42	12	97	2	<LOD	2	2	2	0	0
2011-10-11	1	1-0698	2	7	2	2	2	2	2	38.7	16.9597	133	30	FALSE	FALSE	FALSE	FALSE	10.72	39	171	8.04	1.89	0.64	45	36	13	83	2	<LOD	2	2	2	0	0
2011-10-11	1	1-0699	1	9	2	1	1	2	2	38.8	17.3283	138	33	FALSE	FALSE	FALSE	FALSE	2.59	39.7	108	1.56	0.88	0.14	45.7	62	33	99	1	2		2	1	2	1
2011-10-11	1	1-0700	2	10	1	2	2	2	2	39.1	20.4518	145	43	FALSE	FALSE	FALSE	FALSE	7.62	41.3	296	5.46	1.65	0.48	48.7	32	18	78	2	<LOD	2	2	2	0	0
2011-10-11	1	1-0701	2	11	3	1	2	1	1	39.1	14.6092	148	32	TRUE	FALSE	FALSE	FALSE	2.74	41.5	140	1.92	0.7	0.12	45.6	51	17	99	2	<LOD	2	2	2	0	3
2011-10-11	1	1-0702	2	2	3	1	2	2	2	38.2	15.4321	90	12.5	FALSE	FALSE	FALSE	FALSE	12.51	39.1	220	9.8	2.12	0.52	43.5	52	38	63	2	<LOD	2	2	2	0	0
2011-10-11	1	1-0703	1	14	3	2	2	2	2	38.9	20.3954	155	49	FALSE	FALSE	FALSE	FALSE	5.02	41.1	148	3.57	1.03	0.42	42.8	33	13	75	1	3		1	1	1	2
2011-10-11	1	1-0704	2	8	2	1	1	2	2	38.5	10.2725	136	19	FALSE	FALSE	FALSE	FALSE	4.04	39.8	155	2.11	1.49	0.44	48.9	42	16	109	2	<LOD	2	2	2	0	0
2011-10-11	1	1-0705	1	8	3	2	2	2	2	38.7	12.207	128	20	FALSE	FALSE	FALSE	FALSE	4.73	35.6	181	2.81	1.65	0.26	43.9	39	13	139	2	<LOD	2	2	2	0	0
2011-10-11	1	1-0706	2	10	3	1	1	2	1	38.6	17.3283	138	33	TRUE	FALSE	FALSE	FALSE	1.97	42.1	118	1.01	0.86	0.1	42.6	63	28	109	1	1		1	1	2	1
2011-11-11	1	1-0707	1	2	2	2	2	2	2	39	18.1138	91	15	TRUE	FALSE	FALSE	TRUE	4.77	31.4	232	2.28	2.05	0.4	39.4	75	25	85	1	2		1	2	0	0
2011-11-11	1	1-0708	2	2	2	1	1	2	2	38.9	27.1605	90	22	TRUE	FALSE	FALSE	FALSE	4.95	38.3	194	1.83	2.65	0.43	45.7	50	32	99	2	<LOD	2	2	2	0	0
2011-11-11	1	1-0709	1	13	2	2	2	2	2	39	21.3675	156	52	TRUE	FALSE	FALSE	FALSE	3.64	38.6	114	2.03	1.05	0.55	42	36	15	336	1	4		1	2	0	0
2011-11-11	1	1-0710	1	1	2	2	2	2	2	38.6	17.313	76	10	TRUE	FALSE	FALSE	FALSE	10.86	35.1	179	4.53	5.75	0.47	42.1	46	15	105	2	<LOD	2	2	2	0	0
11/14/11 12:00 AM	1	1-0711	2	4	2	2	2	2	2	38.7	15.3894	114	20	FALSE	FALSE	FALSE	FALSE	9.34	37.8	250	4.62	3.75	0.93	46.6	43	15	131	1	3		2	2	0	0
11/14/11 12:00 AM	1	1-0712	1	5	2	1	2	2	2	38.8	14.3667	115	19	FALSE	FALSE	FALSE	FALSE	11.37	39.1	303	7.4	2.79	1.17	44.8	39	13	76	2	<LOD	2	2	2	0	0
11/14/11 12:00 AM	1	1-0713	1	2	2	2	2	2	2	38.9	22.2222	90	18	FALSE	FALSE	FALSE	FALSE	9.27	44.7	275	4.1	4.53	0.62	47.9	47	17	110	2	<LOD	2	2	2	0	0
11/14/11 12:00 AM	1	1-0714	2	3	2	2	2	2	1	38.3	15.2784	94	13.5	FALSE	FALSE	TRUE	FALSE	5.11	40.6	86	1.31	3.02	0.59	42.6	77	37	50	1	1		1	1	2	1
11/15/11 12:00 AM	1	1-0715	1	1	2	2	2	2	2	38.7	17.313	76	10	FALSE	FALSE	FALSE	FALSE	7.24	32.2	143	4.91	1.75	0.47	41.3	42	21	98	2	<LOD	2	2	2	0	2
11/15/11 12:00 AM	1	1-0716	2	8	2	2	2	2	2	39	19.2044	135	35	FALSE	FALSE	FALSE	FALSE	5.76	34.9	255	4.61	0.7	0.43	38.2	30	16	100	2	<LOD	2	2	2	0	0
11/15/11 12:00 AM	1	1-0717	1	14	2	2	2	2	2	39.5	18.026	158	45	FALSE	FALSE	FALSE	FALSE	12.22	40	188	10.48	1.07	0.64	45.8	21	3	153	2	<LOD	2	2	2	0	0
11/15/11 12:00 AM	1	1-0718	1	5	3	2	2	2	2	38.6	13.8798	117	19	FALSE	FALSE	FALSE	FALSE	7.54	40.7	323	4.97	2.22	0.34	46	47	14	59	2	<LOD	2	2	2	0	0
11/15/11 12:00 AM	1	1-0719	1	2	2	2	2	2	2	38.9	15.7808	89	12.5	FALSE	FALSE	FALSE	FALSE	14.6	33.1	376	7.48	5.31	1.79	34.6	64	59	41	2	<LOD	2	2	2	0	0
11/16/11 12:00 AM	1	1-0720	1	7	2	1	2	2	2	39.1	13.2002	132	23	FALSE	FALSE	FALSE	FALSE	8.68	37.9	293	5.55	2.5	0.56	43.1	36	21	88	2	<LOD	2	2	2	0	0
11/16/11 12:00 AM	1	1-0721	1	4	1	1	2	2	2	38.5	11.7472	113	15	FALSE	FALSE	FALSE	FALSE	12.76	34.8	367	9.01	2.97	0.77	41.9	46	18	91	2	<LOD	2	2	2	0	2
11/16/11 12:00 AM	1	1-0722	1	8	2	1	2	2	2	38.7	10.9223	137	20.5	FALSE	FALSE	FALSE	FALSE	4.52	39.8	146	2.43	1.71	0.36	44.6	43	13	103	2	<LOD	2	2	2	0	0
11/16/11 12:00 AM	1	1-0723	2	9	3	2	2	2	1	39.2	16.3265	140	32	FALSE	FALSE	FALSE	FALSE	4.95	41	183	2.63	1.76	0.55	40.9	37	19	101	1	3		1	1	1	1
11/17/11 12:00 AM	1	1-0724	1	5	2	2	2	1	2	38.8	11.3422	115	15	FALSE	FALSE	FALSE	FALSE	6.66	36.6	220	2.08	3.74	0.6	40.6	47	19	93	2	<LOD	2	2	2	0	0
11/17/11 12:00 AM	1	1-0725	1	2	1	2	1	2	2	37.9	16.9062	91	14	FALSE	FALSE	FALSE	FALSE	9.01	34.4	229	6.15	2.23	0.62	46.5	51	19	170	2	<LOD	2	2	2	0	0
11/17/11 12:00 AM	1	1-0726	1	9	3	2	2	2	2	39	17.8571	140	35	FALSE	FALSE	FALSE	FALSE	2.72	39.1	163	1.46	0.97	0.27	39.4	79	35	199	1	1		1	2	0	0
11/17/11 12:00 AM	1	1-0727	1	3	2	1	1	2	2	38.6	15.5125	95	14	FALSE	FALSE	FALSE	FALSE	13.23	35.6	291	11.47	1.19	0.57	40.7	87	55	68	2	<LOD	2	2	2	0	0
11/17/11 12:00 AM	1	1-0728	1	10	1	2	2	2	2	38.6	12.3983	142	25	FALSE	FALSE	FALSE	FALSE	11.97	41.2	192	8.88	2.24	0.81	51.6	90	35	110	1	2		1	2	0	0
11/18/11 12:00 AM	1	1-0729	1	5	2	2	2	2	2	38.6	18.9036	115	25	FALSE	FALSE	FALSE	FALSE	4.63	37.1	258	2.08	2.34	0.2	42	50	23	227	2	<LOD	2	2	2	0	0
11/21/11 12:00 AM	1	1-0730	2	3	2	1	1	2	2	38.5	11.3932	96	10.5	FALSE	FALSE	FALSE	FALSE	6	35.8	198	2.93	2.62	0.43	43	55	19	84	2	<LOD	2	2	2	0	0
11/21/11 12:00 AM	1	1-0731	1	7	2	1	1	2	2	39.2	14.4798	134	26	FALSE	FALSE	FALSE	FALSE	16.99	34.5	329	13.35	2.51	1.11	44.2	18	15	62	2	<LOD	2	2	2	0	2
11/21/11 12:00 AM	1	1-0732	1	2	2	2	1	2	1	38.8	16.9062	91	14	FALSE	FALSE	FALSE	FALSE	5.47	31.2	160	1.76	3.15	0.45	39.9	56	23	318	2	<LOD	2	2	2	0	2
11/21/11 12:00 AM	1	1-0733	1	10	3	2	2	2	2	38.6	23.9474	134	43	TRUE	FALSE	FALSE	FALSE	2.47	37.1	112	1.41	0.93	0.13	44.4	196	138	75	1	1		2	1	2	1
11/22/11 12:00 AM	1	1-0734	2	10	3	1	2	2	2	38.7	21.3251	142	43	FALSE	FALSE	FALSE	FALSE	2.27	41.9	131	1.31	0.85	0.11	44.2	72	47	91	1	2		1	1	2	1
11/22/11 12:00 AM	1	1-0735	1	2	2	2	2	2	2	38.9	16.3043	92	13.8	FALSE	FALSE	FALSE	FALSE	9.43	34.6	332	3.64	4.33	1.34	47.2	59	27	82	2	<LOD	2	2	2	0	0
11/22/11 12:00 AM	1	1-0736	2	2	3	2	1	2	2	38.6	16.9062	91	14	FALSE	FALSE	FALSE	FALSE	9.22	37.4	166	5.06	3.42	0.71	44.8	45	20	174	2	<LOD	2	2	2	0	0
11/22/11 12:00 AM	1	1-0737	2	3	2	1	1	2	2	39	22.1607	95	20	FALSE	FALSE	FALSE	FALSE	6.95	33.7	232	4.52	1.95	0.42	46.5	49	23	123	2	<LOD	2	2	2	0	0
11/22/11 12:00 AM	1	1-0738	1	2	2	2	2	2	2	38.7	13.5802	90	11	FALSE	FALSE	FALSE	FALSE	17.49	40.9	587	13.04	3.8	0.55	46.7	58	20	72	2	<LOD	2	2	2	0	0
11/22/11 12:00 AM	1	1-0739	2	4	2	2	2	2	2	39	17.2292	113	22	FALSE	FALSE	FALSE	FALSE	6.25	35.5	203	2.56	3.34	0.35	44.6	38	12	155	2	<LOD	2	2	2	0	0
11/22/11 12:00 AM	1	1-0740	1	1	1	2	2	2	2	38.8	12.7551	84	9	FALSE	FALSE	TRUE	FALSE	13.31	34.4	299	7.54	4.74	0.83	43	41	16	67	2	<LOD	2	2	2	0	0
11/23/11 12:00 AM	1	1-0741	2	3	2	1	2	2	2	39	20.0738	96	18.5	FALSE	FALSE	FALSE	FALSE	4.78	35.5	345	0.95	3.34	0.47	45.4	28	15	40	2	<LOD	2	2	2	0	0
11/23/11 12:00 AM	1	1-0742	2	2	3	1	1	2	2	38.4	12.3967	88	9.6	FALSE	FALSE	FALSE	FALSE	18.78	33.7	594	11.92	5.81	0.94	44.2	34	17	48	2	<LOD	2	2	2	0	0
11/24/11 12:00 AM	1	1-0743	1	3	2	2	2	2	2	38.8	15.8443	94	14	FALSE	FALSE	FALSE	FALSE	8.38	34.8	274	2.96	4.74	0.67	47.1	46	22	105	1	1		2	2	0	0
11/24/11 12:00 AM	1	1-0744	2	4	2	2	2	2	2	38.6	13.8504	114	18	FALSE	FALSE	FALSE	FALSE	6.78	38.9	201	3.19	2.93	0.65	50	48	13	85	2	<LOD	2	2	2	0	0
11/25/11 12:00 AM	1	1-0745	1	1	2	2	2	2	2	38.7	17.2584	78	10.5	FALSE	FALSE	FALSE	FALSE	16.02	33.5	187	10.36	4.57	1.04	41.1	29	13	92	2	<LOD	2	2	2	0	0
11/25/11 12:00 AM	1	1-0746	1	10	3	2	2	2	2	38.8	14.7444	145	31	FALSE	FALSE	FALSE	FALSE	2.1	35.6	146	1.27	0.73	0.1	40.6	78	23	191	1	3		1	2	0	0
11/25/11 12:00 AM	1	1-0747	2	3	1	1	2	2	2	39	13.0208	96	12	FALSE	FALSE	FALSE	FALSE	22.43	41.4	333	18.24	3.27	0.84	48.9	45	20	84	2	<LOD	2	2	2	0	0
11/25/11 12:00 AM	1	1-0748	2	7	3	1	2	2	2	38.5	14.9219	132	26	TRUE	FALSE	FALSE	FALSE	4.07	37.1	214	2.37	1.12	0.58	43.3	44	16	133	1	3		1	1	1	1
11/25/11 12:00 AM	1	1-0749	2	8	2	1	2	2	2	38.6	15.451	137	29	TRUE	FALSE	FALSE	FALSE	13.7	41.4	359	10.03	3.2	0.4	48	48	34	87	2	<LOD	2	2	2	0	0
11/25/11 12:00 AM	1	1-0750	1	11	2	1	2	2	1	38.7	14.8086	147	32	FALSE	FALSE	FALSE	FALSE	4.88	39	222	3.07	1.08	0.72	44.7	62	25	104	1	2		2	2	0	0
11/29/11 12:00 AM	1	1-0751	1	4	2	1	1	2	2	38.8	11.1607	112	14	FALSE	FALSE	FALSE	FALSE	4.62	34	138	1.71	2.54	0.33	42.2	54	19	133	2	<LOD	2	2	2	0	2
11/30/11 12:00 AM	1	1-0752	2	1	1	1	2	2	2	38.8	12.9132	88	10	FALSE	FALSE	FALSE	FALSE	8.52	39.3	268	4.69	3.23	0.47	45.7	66	37	51	2	<LOD	2	2	2	0	0
11/30/11 12:00 AM	1	1-0753	2	4	1	1	2	2	2	38.5	12.1743	111	15	FALSE	FALSE	FALSE	FALSE	7.9	37.8	265	5.37	2.08	0.41	48.3	45	16	73	2	<LOD	2	2	2	0	2
11/30/11 12:00 AM	1	1-0754	1	2	3	2	2	2	2	38.7	14.8148	90	12	FALSE	FALSE	FALSE	FALSE	6.38	37.7	191	1.24	4.66	0.44	41.6	60	24	163	2	<LOD	2	2	2	0	0
11/30/11 12:00 AM	1	1-0755	1	11	3	2	2	2	1	38.8	17.7778	150	40	TRUE	FALSE	FALSE	FALSE	2.51	44.7	147	0.91	1.28	0.28	44	57	25	499	1	3		1	2	0	0
11/30/11 12:00 AM	1	1-0756	2	2	2	2	2	2	2	39	15.1496	89	12	FALSE	FALSE	FALSE	FALSE	12.07	40	343	4.03	6.84	1.18	47.4	72	61	202	2	<LOD	2	2	2	0	0
11/30/11 12:00 AM	1	1-0757	1	7	3	2	1	2	1	38.8	20.0872	132	35	FALSE	FALSE	FALSE	FALSE	6.06	35.1	145	4.39	1.46	0.2	37.2	66	31	129	1	3		2	1	1	2
11/30/11 12:00 AM	1	1-0758	2	5	2	1	1	2	2	40	15.1229	115	20	FALSE	FALSE	FALSE	FALSE	9.06	37.3	281	5.98	2.39	0.47	39.1	36	15	123	2	<LOD	2	2	2	0	0
11/30/11 12:00 AM	1	1-0759	1	9	2	1	2	2	2	39	15.3061	140	30	FALSE	FALSE	FALSE	FALSE	12.05	41.2	223	8.5	2.7	0.82	46	33	22	103	2	<LOD	2	2	2	0	0
2011-02-12	1	1-0760	1	10	3	1	2	2	1	38.7	27.1106	145	57	FALSE	FALSE	FALSE	FALSE	4.33	40.8	80	1.31	2.31	0.36	39.6	59	27	101	1	1		2	1	2	1
2011-02-12	1	1-0761	2	9	1	2	2	2	2	38.9	11.5688	141	23	FALSE	FALSE	FALSE	FALSE	7.72	37.7	358	4.7	2.54	0.47	46.9	30	20	106	2	<LOD	2	2	2	0	0
2011-02-12	1	1-0762	1	3	2	1	2	2	2	39	15.191	96	14	FALSE	FALSE	TRUE	FALSE	2.34	35	173	0.84	1.31	0.19	39.1	62	24	136	1	1		1	2	0	0
2011-02-12	1	1-0763	1	7	1	2	2	2	2	39	12.4371	133	22	FALSE	FALSE	FALSE	FALSE	13.83	36.2	308	12.56	0.74	0.52	49.1	28	21	127	2	<LOD	2	2	2	0	0
2011-05-12	1	1-0764	1	5	3	2	2	2	2	38.7	15.1229	115	20	FALSE	FALSE	FALSE	FALSE	5.7	34.4	181	3.5	1.61	0.49	41.3	33	11	153	2	<LOD	2	2	2	0	2
2011-05-12	1	1-0765	1	6	2	1	2	2	2	38.8	16.3923	121	24	FALSE	FALSE	FALSE	FALSE	20.21	37.3	329	17.56	1.71	0.9	48.1	36	17	180	2	<LOD	2	2	2	0	0
2011-05-12	1	1-0766	2	5	2	1	2	2	2	38.9	12.4187	117	17	FALSE	FALSE	FALSE	FALSE	2.23	36.5	127	0.8	1.24	0.19	41.7	59	24	139	1	4		1	1	2	1
2011-07-12	1	1-0767	2	2	3	2	2	2	2	38.7	20.2336	93	17.5	FALSE	FALSE	FALSE	FALSE	10.17	36.6	193	4.35	5.24	0.55	43	47	20	116	2	<LOD	2	2	2	0	0
2011-07-12	1	1-0768	1	5	1	2	2	2	2	39	13.6106	115	18	FALSE	FALSE	FALSE	FALSE	8.78	36.4	238	7.17	0.84	0.66	47.7	37	15	96	1	1		1	2	0	0
2011-07-12	1	1-0769	2	8	2	2	1	2	2	39	25.3924	114	33	FALSE	FALSE	FALSE	FALSE	3.44	40.4	123	1.66	1.48	0.3	45.3	79	49	94	1	1		1	1	2	1
2011-07-12	1	1-0770	2	1	2	1	2	2	2	38.7	16.4062	80	10.5	FALSE	FALSE	FALSE	FALSE	8.93	34.7	255	4.1	4.4	0.4	43.3	43	20	80	2	<LOD	2	2	2	0	2
2011-07-12	1	1-0771	1	13	3	1	2	2	1	39.1	20.0288	158	50	FALSE	FALSE	FALSE	FALSE	2.69	44.1	108	1.75	0.74	0.19	46	55	31	167	1	4		1	2	0	0
2011-08-12	1	1-0772	1	14	1	2	2	2	2	39.2	16.8242	158	42	TRUE	FALSE	FALSE	FALSE	11.65	39.1	195	9.49	1.27	0.87	48.1	24	8	88	2	<LOD	2	2	2	0	0
2011-08-12	1	1-0773	2	11	1	2	2	2	2	38.9	13.6961	148	30	TRUE	FALSE	FALSE	TRUE	7.28	40.1	190	5.35	1.17	0.65	42.9	32	16	73	1	1		1	1	1	1
2011-09-12	1	1-0774	1	9	2	1	2	2	2	38.8	17.6047	141	35	FALSE	FALSE	FALSE	FALSE	3.12	40	235	1.62	1.02	0.44	45	42	34	122	1	4		1	1	2	1
2011-12-12	1	1-0775	2	3	2	1	1	2	2	38.7	20.6163	96	19	FALSE	FALSE	FALSE	FALSE	10.92	39.9	330	4.95	5.17	0.77	47.5	46	9	98	2	<LOD	2	2	2	0	0
2011-12-12	1	1-0776	2	8	2	1	1	2	2	38.6	15.451	137	29	TRUE	FALSE	FALSE	FALSE	5.89	40.2	217	4.3	1.04	0.54	48.5	54	28	136	2	<LOD	2	2	2	0	0
12/14/11 12:00 AM	1	1-0777	2	1	1	1	2	2	2	38.7	14.1969	86	10.5	FALSE	FALSE	FALSE	FALSE	7.86	36.2	217	3.99	3.03	0.76	47.5	50	18	120	2	<LOD	2	2	2	0	0
12/14/11 12:00 AM	1	1-0778	1	2	1	1	2	2	2	39	15.6986	91	13	FALSE	FALSE	FALSE	FALSE	12.88	36.8	373	7.92	3.78	1.15	41.1	40	17	63	2	<LOD	2	2	2	0	0
12/15/11 12:00 AM	1	1-0779	1	6	2	2	2	2	2	38.9	15.0263	121	22	FALSE	FALSE	FALSE	FALSE	5.49	37.7	246	1.83	2.77	0.87	47.1	35	15	85	2	<LOD	2	2	2	0	0
12/15/11 12:00 AM	1	1-0780	2	3	1	2	2	2	2	38.8	17.3611	96	16	FALSE	FALSE	FALSE	FALSE	12.52	34.9	363	6.89	4.95	0.67	46.1	30	14	74	2	<LOD	2	2	2	0	0
12/15/11 12:00 AM	1	1-0781	1	1	3	2	2	2	2	39	13.8408	85	10	TRUE	FALSE	FALSE	FALSE	6.19	35.5	180	2.19	3.33	0.63	46.2	72	42	316	1	4		2	2	0	0
12/16/11 12:00 AM	1	1-0782	1	8	2	2	2	2	2	38.7	15.3635	135	28	TRUE	FALSE	FALSE	TRUE	5.22	37.9	172	3.03	1.77	0.41	40.4	37	10	71	1	4		1	1	2	1
12/16/11 12:00 AM	1	1-0783	1	1	2	1	2	2	2	39	17.0068	84	12	TRUE	FALSE	FALSE	FALSE	8.04	34.6	229	3.6	3.66	0.67	43.5	48	22	74	2	<LOD	2	2	2	0	0
12/16/11 12:00 AM	1	1-0784	1	2	2	1	2	2	2	39.2	23.9869	89	19	TRUE	FALSE	FALSE	TRUE	9.55	35	224	3.74	5.18	0.56	43.3	51	25	180	2	<LOD	2	2	2	0	2
12/16/11 12:00 AM	1	1-0785	2	5	2	1	2	2	2	39	11.6882	117	16	TRUE	FALSE	FALSE	TRUE	5.88	37.7	196	4.37	1.09	0.42	46.5	39	16	97	2	<LOD	2	2	2	0	0
12/16/11 12:00 AM	1	1-0786	1	7	2	2	2	2	2	38.8	11.1383	134	20	FALSE	FALSE	FALSE	FALSE	13.05	36.6	422	8.96	3.63	0.42	46.4	35	7	74	2	<LOD	2	2	2	0	0
12/16/11 12:00 AM	1	1-0787	2	2	2	2	2	2	2	38.7	14.491	91	12	FALSE	FALSE	FALSE	FALSE	7.74	33.5	244	6.08	1.05	0.56	46.3	45	18	168	2	<LOD	2	2	2	0	0
12/19/11 12:00 AM	1	1-0788	2	7	1	1	2	2	2	38.8	16.7075	134	30	TRUE	FALSE	FALSE	FALSE	17.24	40.9	187	14.91	1.46	0.83	46.2	31	13	126	2	<LOD	2	2	2	0	0
12/19/11 12:00 AM	1	1-0789	2	3	2	1	2	2	2	39.6	17.3611	96	16	FALSE	FALSE	FALSE	FALSE	7.87	33.7	280	5.06	2.12	0.68	45.7	44	16	158	2	<LOD	2	2	2	0	0
12/19/11 12:00 AM	1	1-0790	2	9	2	1	2	2	2	38.5	12.5748	141	25	FALSE	FALSE	FALSE	FALSE	10.69	38.8	189	8.15	1.91	0.61	44.4	37	18	92	2	<LOD	2	2	2	0	2
12/19/11 12:00 AM	1	1-0791	2	9	3	1	2	2	2	38.9	14.6706	143	30	TRUE	FALSE	FALSE	FALSE	2.21	37.3	159	1.35	0.79	0.07	39.7	101	39	986	1	1		1	2	0	0
12/19/11 12:00 AM	1	1-0792	1	11	3	2	2	2	1	38.6	31.1111	150	70	TRUE	FALSE	FALSE	FALSE	4.61	41.7	146	1.98	2.07	0.52	42.8	32	24	114	1	2		2	2	0	0
12/19/11 12:00 AM	1	1-0793	2	11	2	2	2	2	2	38.5	16.6597	147	36	FALSE	FALSE	FALSE	FALSE	6.95	39.3	175	3.87	2.37	0.71	47.9	26	11	80	2	<LOD	2	2	2	0	0
12/20/11 12:00 AM	1	1-0794	1	4	2	2	2	2	2	38.2	13.5523	112	17	FALSE	FALSE	FALSE	FALSE	12.58	35	217	9.11	3.05	0.41	43.7	61	36	64	2	<LOD	2	2	2	0	0
12/20/11 12:00 AM	1	1-0795	2	3	2	2	2	2	2	38.6	16.7649	93	14.5	FALSE	FALSE	FALSE	FALSE	3.58	36	225	1.45	1.76	0.35	39.8	46	17	78	2	<LOD	2	2	2	0	0
12/20/11 12:00 AM	1	1-0796	2	11	2	2	2	2	2	38.3	20.8247	147	45	FALSE	FALSE	FALSE	FALSE	3.12	35.3	144	1.38	1.42	0.28	37.5	33	17	114	1	3		1	1	2	1
12/21/11 12:00 AM	1	1-0797	2	6	2	1	1	2	2	38.2	15.7093	121	23	TRUE	FALSE	FALSE	FALSE	8.51	35.1	308	4.76	2.86	0.88	40.9	35	14	59	2	<LOD	2	2	2	0	0
12/21/11 12:00 AM	1	1-0798	1	4	2	1	2	2	2	38.8	14.876	110	18	TRUE	FALSE	FALSE	FALSE	8.04	34.6	236	4.54	3.08	0.38	41	37	12	149	2	<LOD	2	2	2	0	0
12/22/11 12:00 AM	1	1-0799	1	5	3	1	2	2	2	38.7	10.2272	117	14	FALSE	FALSE	FALSE	FALSE	7.83	35.6	297	6.11	1.39	0.31	44.3	38	12	94	2	<LOD	2	2	2	0	0
12/23/11 12:00 AM	1	1-0800	2	6	2	2	2	2	2	39	14.3433	121	21	TRUE	FALSE	FALSE	FALSE	3.71	35.3	239	2	1.07	0.63	44	45	14	83	1	3		1	2	0	0
12/28/11 12:00 AM	1	1-0801	2	4	2	2	2	2	2	39	11.542	114	15	TRUE	FALSE	FALSE	FALSE	6.99	35.1	434	2.58	3.77	0.54	43.7	38	20	128	2	<LOD	2	2	2	0	0
12/28/11 12:00 AM	1	1-0802	1	7	2	1	2	2	2	38.7	9.61049	133	17	TRUE	FALSE	FALSE	FALSE	4.18	38.3	261	2.4	1.49	0.28	45	44	14	214	1	2		2	2	0	0
12/28/11 12:00 AM	1	1-0803	1	8	2	2	2	2	2	39	12.4351	136	23	TRUE	FALSE	FALSE	FALSE	3.62	34.9	151	1.55	1.68	0.38	39.7	40	15	77	2	<LOD	2	2	2	0	2
12/29/11 12:00 AM	1	1-0804	2	7	2	1	2	2	2	39.1	11.1383	134	20	TRUE	FALSE	FALSE	FALSE	10.1	37.4	267	4.91	3.99	1.18	43.5	48	15	107	2	<LOD	2	2	2	0	0
12/29/11 12:00 AM	1	1-0805	1	5	3	1	1	2	2	39.3	11.6882	117	16	TRUE	FALSE	FALSE	TRUE	6.34	39.5	146	3.28	2.71	0.34	45	83	23	98	1	<LOD	1	2	1	2	2
12/30/11 12:00 AM	1	1-0806	1	4	2	1	2	2	2	39.4	14.6199	114	19	TRUE	FALSE	FALSE	FALSE	9.23	34.6	280	8.13	0.55	0.54	47.3	29	15	59	1	4		2	2	0	0
12/30/11 12:00 AM	1	1-0807	2	6	2	1	2	2	2	39.1	10.0779	122	15	TRUE	FALSE	FALSE	FALSE	7.57	36.5	271	4.96	2.17	0.35	43.2	50	24	60	2	<LOD	2	2	2	0	0
12/30/11 12:00 AM	1	1-0808	1	14	2	2	2	2	2	39.5	16.4366	156	40	TRUE	FALSE	FALSE	FALSE	3.02	37.5	85	1.57	1.14	0.3	43.4	78	30	705	1	2		1	1	2	1
12/30/11 12:00 AM	1	1-0809	2	6	3	2	1	2	1	38.9	14.1233	119	20	FALSE	FALSE	FALSE	FALSE	4.8	38.7	176	2.6	1.86	0.29	43	48	13	100	1	2		2	2	0	0
12/30/11 12:00 AM	1	1-0810	1	9	3	2	2	2	2	38.7	27.2763	142	55	FALSE	FALSE	FALSE	FALSE	3.84	39.1	216	1.82	1.56	0.43	44.7	51	26	227	2	<LOD	2	2	2	0	0
2012-03-01	1	1-0811	2	3	2	2	2	2	2	38.9	18.9036	92	16	FALSE	FALSE	FALSE	FALSE	8.56	35.3	327	6.39	1.7	0.41	46	32	16	72	2	<LOD	2	2	2	0	0
2012-04-01	1	1-0812	1	5	1	2	2	2	2	39	15.3894	114	20	FALSE	FALSE	FALSE	FALSE	8.68	33.2	232	6.78	1.47	0.27	40.7	30	15	79	2	<LOD	2	2	2	0	0
2012-04-01	1	1-0813	1	4	3	1	2	2	2	38.7	14.8794	97	14	FALSE	FALSE	FALSE	FALSE	8.87	35.8	252	4.59	3.32	0.94	44	33	14	48	2	<LOD	2	2	2	0	0
2012-04-01	1	1-0814	2	8	3	2	2	2	2	38.8	12.0713	135	22	FALSE	FALSE	FALSE	FALSE	2.94	40	216	1.82	0.79	0.31	45	50	35	100	1	4		1	2	0	0
2012-04-01	1	1-0815	1	11	2	2	2	2	2	39.2	12.3265	148	27	TRUE	FALSE	FALSE	FALSE	13.04	41	282	10.29	2.03	0.7	44.6	30	17	106	2	<LOD	2	2	2	0	0
2012-05-01	1	1-0816	2	2	3	2	2	2	2	38.7	14.5159	83	10	FALSE	FALSE	FALSE	FALSE	7.92	34.4	159	2.58	4.58	0.72	46.8	55	23	86	2	<LOD	2	2	2	0	0
2012-06-01	1	1-0817	2	2	2	2	2	2	2	38.6	22.8624	81	15	FALSE	FALSE	FALSE	FALSE	16.03	35.8	339	10.38	4.37	1.07	45.9	29	9	142	2	<LOD	2	2	2	0	0
2012-10-01	1	1-0818	2	4	3	2	2	2	2	38.8	15.0306	93	13	FALSE	FALSE	FALSE	FALSE	10.25	33.2	332	3.92	5.19	0.47	44.3	41	15	119	2	<LOD	2	2	2	0	0
2012-10-01	1	1-0819	1	2	2	2	2	2	2	38.7	23.0518	82	15.5	FALSE	FALSE	FALSE	FALSE	6.24	36	164	3.4	1.88	0.91	46.9	52	22	167	2	<LOD	2	2	2	0	0
1/30/12 12:00 AM	1	1-0820	1	5	3	1	1	2	2	38.6	11.9579	112	15	FALSE	FALSE	FALSE	FALSE	12.83	36.3	380	9.02	3.05	0.59	44.4	37	16	50	2	<LOD	2	2	2	0	0
1/31/12 12:00 AM	1	1-0821	1	2	2	2	1	2	2	39	13.8504	95	12.5	FALSE	FALSE	FALSE	FALSE	6.52	36.2	170	4.51	1.15	0.82	45.3	48	18	171	2	<LOD	2	2	2	0	0
2012-01-02	1	1-0822	1	4	2	2	1	2	2	38.7	15.6185	98	15	FALSE	FALSE	FALSE	FALSE	12.48	37.7	267	8.44	3.09	0.9	44.4	40	16	58	2	<LOD	2	2	2	0	0
2012-01-02	1	1-0823	1	15	3	2	2	2	2	39	21.3675	156	52	TRUE	FALSE	FALSE	FALSE	8.71	40.5	289	6	2.1	0.55	44.8	66	97	75	2	<LOD	2	2	2	0	0
2012-01-02	1	1-0824	2	2	3	2	2	2	2	38.8	14.9367	81	9.8	TRUE	FALSE	FALSE	FALSE	6.61	37.3	196	2.8	3.12	0.64	43.4	64	31	83	2	<LOD	2	2	2	0	0
2012-02-02	1	1-0825	1	6	2	2	2	2	2	38.8	15.9439	112	20	FALSE	FALSE	FALSE	TRUE	9.21	37.2	223	7.01	1.37	0.81	41.1	78	27	70	1	2		1	1	2	1
2012-03-02	1	1-0826	1	7	2	2	2	2	2	38.9	19.1244	121	28	FALSE	FALSE	TRUE	FALSE	7.73	38.9	446	5.83	1.41	0.45	45.2	35	14	84	1	<LOD	1	2	2	0	0
2012-03-02	1	1-0827	1	9	2	1	2	2	2	38.8	15.1384	136	28	FALSE	FALSE	FALSE	FALSE	9.37	40.6	297	4.66	3.8	0.89	50	41	14	132	2	<LOD	2	2	2	0	0
2012-03-02	1	1-0828	1	14	2	2	2	2	2	38.7	20.9572	162	55	FALSE	FALSE	FALSE	FALSE	4.86	37.4	146	3.18	1.15	0.52	43.8	45	24	167	1	4		1	2	0	0
2012-03-02	1	1-0829	2	3	2	2	2	2	2	38.6	13.8871	89	11	FALSE	FALSE	FALSE	FALSE	5.15	34.8	290	3.7	1.14	0.3	44.5	54	21	114	2	<LOD	2	2	2	0	0
2012-03-02	1	1-0830	1	9	2	2	2	2	2	39	13.7174	135	25	FALSE	FALSE	FALSE	FALSE	8.34	34.4	200	4.4	3.23	0.7	44	49	24	116	2	<LOD	2	2	2	0	0
2012-06-02	1	1-0831	1	10	3	1	2	2	2	39.2	15.4321	144	32	FALSE	FALSE	FALSE	TRUE	5.16	44	172	2.67	1.87	0.61	44.8	92	62	88	1	4		1	1	2	3
2012-06-02	1	1-0832	2	11	3	2	2	2	2	39	16.4196	146	35	FALSE	FALSE	FALSE	FALSE	2.7	35.3	118	1.8	0.77	0.12	45.5	31	15	131	2	<LOD	2	2	2	0	0
2012-06-02	1	1-0833	1	3	3	2	2	2	2	38.8	19.3213	91	16	FALSE	FALSE	FALSE	FALSE	10.02	36	236	6.63	2.34	0.9	43.4	35	17	85	2	<LOD	2	2	2	0	0
2012-06-02	1	1-0834	2	2	3	2	2	2	1	38.9	12.7551	84	9	FALSE	FALSE	FALSE	FALSE	15.22	34.4	247	8.53	5.26	1.41	38.5	42	24	42	2	<LOD	2	2	2	0	0
2012-08-02	1	1-0835	1	3	2	2	2	2	2	38.7	13.5802	90	11	FALSE	FALSE	FALSE	FALSE	13.81	34.1	276	4.67	7.79	1.08	44	105	130	90	2	<LOD	2	2	2	0	0
2012-08-02	1	1-0836	1	6	2	2	2	2	2	39	13.6106	115	18	FALSE	FALSE	FALSE	FALSE	12.85	35	317	8.9	2.81	1.04	44.1	29	13	63	2	<LOD	2	2	2	0	2
2012-08-02	1	1-0837	1	8	2	2	2	2	2	39	10.5814	134	19	FALSE	FALSE	FALSE	FALSE	10.9	36.9	256	6.81	3.03	0.92	45	29	10	116	2	<LOD	2	2	2	0	0
2012-09-02	1	1-0838	2	8	3	2	2	2	2	38.9	14.348	132	25	FALSE	FALSE	FALSE	FALSE	13.01	38.1	239	8.62	3.51	0.77	48.1	32	17	109	2	<LOD	2	2	2	0	0
2012-09-02	1	1-0839	1	15	2	2	2	2	2	39	17.9931	170	52	FALSE	FALSE	FALSE	FALSE	10.23	48.8	222	6.27	2.26	1.01	51.2	26	16	105	2	<LOD	2	2	2	0	0
2012-10-02	1	1-0840	1	6	3	2	2	2	2	38.8	12.5	120	18	FALSE	FALSE	FALSE	FALSE	4.66	35.5	282	1.48	2.81	0.36	41.6	44	22	129	2	<LOD	2	2	2	0	0
2/14/12 12:00 AM	1	1-0841	2	7	3	2	2	2	2	37.7	10.4139	122	15.5	TRUE	FALSE	FALSE	FALSE	8.2	33.1	195	4.62	2.89	0.63	43.3	42	15	57	2	<LOD	2	2	2	0	0
2/15/12 12:00 AM	1	1-0842	1	5	2	2	2	2	2	38.3	18.9036	115	25	FALSE	FALSE	FALSE	FALSE	7.41	38.2	217	2.2	4.83	0.34	43.7	52	25	146	1	2		1	2	0	0
2/15/12 12:00 AM	1	1-0843	2	4	2	2	2	2	2	39.1	15.191	96	14	FALSE	FALSE	FALSE	FALSE	7.31	35.2	183	3.13	3.74	0.35	45.8	41	19	113	2	<LOD	2	2	2	0	0
2/15/12 12:00 AM	1	1-0844	1	4	2	2	2	2	2	38.7	12.0098	97	11.3	FALSE	FALSE	FALSE	FALSE	14.24	29.6	339	11.36	2.29	0.58	44.5	45	14	86	2	<LOD	2	2	2	0	0
2/16/12 12:00 AM	1	1-0845	2	2	1	2	2	2	2	38.7	10.5888	88	8.2	TRUE	FALSE	FALSE	TRUE	22.51	31.6	508	12.03	8.01	2.18	48.3	50	18	78	2	<LOD	2	2	2	0	2
2/17/12 12:00 AM	1	1-0846	1	4	2	1	1	2	2	39.3	18.4929	97	17.4	TRUE	FALSE	FALSE	TRUE	13.01	34.2	245	9.15	3.05	0.78	42.6	61	23	99	1	2		2	2	0	0
2/20/12 12:00 AM	1	1-0847	2	7	3	2	2	2	2	39.3	11.556	122	17.2	FALSE	FALSE	FALSE	FALSE	18.83	33	370	14.09	3.69	1.02	45.9	35	11	70	2	<LOD	2	2	2	0	0
2/20/12 12:00 AM	1	1-0848	1	13	3	2	2	2	1	39.1	13.0588	158	32.6	FALSE	FALSE	FALSE	FALSE	2.74	43.4	199	1.46	0.96	0.3	43.9	89	38	1636	1	1		1	1	1	1
2/20/12 12:00 AM	1	1-0849	1	14	3	1	2	2	2	38.9	12.4204	159	31.4	FALSE	FALSE	FALSE	FALSE	4.17	41.4	140	2.68	1.29	0.2	44.3	85	35	1427	1	1		1	1	2	1
2/21/12 12:00 AM	1	1-0850	2	8	2	2	2	2	2	39.2	17.3551	136	32.1	FALSE	FALSE	FALSE	FALSE	3.31	40.7	129	2.02	1.02	0.26	41.2	98	31	135	1	4		1	1	2	1
2/21/12 12:00 AM	1	1-0851	2	3	3	2	2	2	2	38.7	15.6185	98	15	FALSE	FALSE	FALSE	FALSE	13.31	30	383	7.87	4.33	0.91	39.4	33	13	68	2	<LOD	2	2	2	0	0
2/22/12 12:00 AM	1	1-0852	2	6	2	2	2	2	2	38.8	12.3528	118	17.2	FALSE	FALSE	FALSE	FALSE	6.83	37.8	422	2.21	4.17	0.42	51.1	31	10	72	2	<LOD	2	2	2	0	0
2/22/12 12:00 AM	1	1-0853	2	9	2	1	2	2	2	38.9	22.4839	137	42.2	FALSE	FALSE	FALSE	FALSE	10.53	36.4	173	8.55	1.63	0.34	44.1	24	12	90	2	<LOD	2	2	2	0	0
2/22/12 12:00 AM	1	1-0854	1	2	2	2	2	2	2	39	13.0424	88	10.1	FALSE	FALSE	FALSE	FALSE	13.46	32.3	364	8.07	3.75	1.62	39.7	43	23	81	2	<LOD	2	2	2	0	0
2/23/12 12:00 AM	1	1-0855	1	4	1	2	2	2	2	38.8	16.261	97	15.3	FALSE	FALSE	FALSE	FALSE	9.26	33.9	127	4.23	4.19	0.78	39.6	58	41	80	2	<LOD	2	2	2	0	2
2/23/12 12:00 AM	1	1-0856	1	1	2	2	2	2	2	38.8	14.5329	85	10.5	FALSE	FALSE	FALSE	FALSE	6.59	38.3	154	3.4	2.74	0.41	41.9	48	23	136	2	<LOD	2	2	2	0	0
2/23/12 12:00 AM	1	1-0857	1	4	2	2	2	2	2	39.3	15.7341	95	14.2	FALSE	FALSE	FALSE	FALSE	11.75	36.8	382	5.74	5.25	0.73	46.7	27	11	47	2	<LOD	2	2	2	0	0
2/24/12 12:00 AM	1	1-0858	1	7	2	2	2	2	2	39	11.8161	121	17.3	FALSE	FALSE	FALSE	FALSE	17.13	34.8	326	11.06	5.11	0.95	43.2	32	14	61	2	<LOD	2	2	2	0	0
2/24/12 12:00 AM	1	1-0859	1	5	3	2	2	2	2	38.7	14.4423	115	19.1	FALSE	FALSE	FALSE	FALSE	6.66	36.2	262	2.67	3.57	0.38	46.5	45	20	178	2	<LOD	2	2	2	0	0
2/24/12 12:00 AM	1	1-0860	2	11	2	2	1	2	2	39	20	150	45	FALSE	FALSE	FALSE	FALSE	7.25	41.6	254	5.47	1.19	0.41	45.3	42	32	90	2	<LOD	2	2	2	0	0
2/27/12 12:00 AM	1	1-0861	1	5	2	2	2	2	2	39.3	16.1588	114	21	FALSE	FALSE	FALSE	FALSE	7.99	33.5	282	3.69	3.72	0.57	38.5	47	12	159	2	<LOD	2	2	2	0	0
2/27/12 12:00 AM	1	1-0862	1	7	2	2	2	2	2	38.9	12.9669	122	19.3	FALSE	FALSE	FALSE	FALSE	10.06	33.3	220	6.7	2.46	0.82	38.3	37	15	76	2	<LOD	2	2	2	0	2
2/27/12 12:00 AM	1	1-0863	1	15	3	2	2	2	2	38.7	17.2266	160	44.1	FALSE	FALSE	FALSE	FALSE	4.71	42.7	247	2.09	1.93	0.55	42.9	24	9	57	2	<LOD	2	2	2	0	0
2/27/12 12:00 AM	1	1-0864	1	5	1	2	2	2	2	38.2	14.8798	113	19	FALSE	FALSE	FALSE	FALSE	22.93	36.1	450	19.51	2	1.4	44.5	36	8	46	2	<LOD	2	2	2	0	0
2/28/12 12:00 AM	1	1-0865	2	2	2	1	2	2	2	39.5	18.3058	89	14.5	FALSE	FALSE	FALSE	FALSE	8.49	33.1	140	4.21	3.7	0.55	43.2	66	18	106	2	<LOD	2	2	2	0	0
2/28/12 12:00 AM	1	1-0866	1	2	2	1	2	2	1	39.1	16.6933	83	11.5	FALSE	FALSE	FALSE	FALSE	14.96	31.4	293	9.19	4.74	1.01	42.9	47	20	133	2	<LOD	2	2	2	0	0
2/28/12 12:00 AM	1	1-0867	1	10	3	1	2	2	2	38.8	20.4325	142	41.2	TRUE	FALSE	FALSE	TRUE	3.87	37.8	184	2.15	1.35	0.36	43	48	25	74	1	1		1	2	0	0
2/29/12 12:00 AM	1	1-0868	1	3	2	2	2	2	2	38.7	16.0609	91	13.3	FALSE	FALSE	FALSE	FALSE	15.76	35.5	257	10.14	4.34	1.11	41.4	27	14	96	2	<LOD	2	2	2	0	0
2/29/12 12:00 AM	1	1-0869	2	7	2	2	2	2	2	39.3	20.8949	122	31.1	FALSE	FALSE	FALSE	FALSE	24.19	39.6	335	21.27	2.1	0.8	43	29	15	149	2	<LOD	2	2	2	0	0
2/29/12 12:00 AM	1	1-0870	1	7	1	2	2	2	2	39.4	16.6667	120	24	FALSE	FALSE	FALSE	FALSE	15.14	41.2	231	11.9	2.27	0.95	46.6	27	9	61	2	<LOD	2	2	2	0	0
2/29/12 12:00 AM	1	1-0871	2	8	3	1	2	2	2	38.7	11.1383	134	20	FALSE	FALSE	FALSE	FALSE	5.73	37.9	193	2.46	2.82	0.44	44.7	47	15	69	2	<LOD	2	2	2	0	0
2/29/12 12:00 AM	1	1-0872	2	3	2	2	2	2	2	38.6	15.5165	96	14.3	TRUE	FALSE	TRUE	FALSE	8.55	34.4	182	4.51	3.47	0.51	45.3	32	16	58	2	<LOD	2	1	2	0	0
2012-01-03	1	1-0873	1	7	3	1	1	1	2	38.7	13.484	123	20.4	TRUE	FALSE	TRUE	TRUE	4.32	37.7	228	1.87	2.16	0.24	39.2	43	17	132	1	2		2	2	0	0
2012-01-03	1	1-0874	1	3	3	2	1	2	2	38.7	12.9962	92	11	TRUE	FALSE	FALSE	FALSE	13.45	33.4	277	9.26	3.14	1.04	40.1	46	20	59	2	<LOD	2	2	2	0	0
2012-02-03	1	1-0875	1	12	2	2	2	2	1	39.5	12.0173	158	30	FALSE	FALSE	FALSE	FALSE	3.57	34.7	127	2.28	0.66	0.63	41.3	52	18	83	1	1		1	1	2	1
2012-02-03	1	1-0876	2	4	2	2	2	2	2	38.5	12.703	98	12.2	FALSE	FALSE	FALSE	FALSE	9.51	33.3	320	7.17	1.85	0.46	46.5	35	15	57	2	<LOD	2	2	2	0	0
2012-02-03	1	1-0877	1	7	3	2	2	2	2	38.7	19.484	122	29	FALSE	FALSE	FALSE	FALSE	4.57	36.9	213	2.1	1.98	0.44	44.5	32	22	115	2	<LOD	2	2	2	0	0
2012-06-03	1	1-0878	2	8	2	2	2	2	2	38	17.8213	134	32	FALSE	FALSE	FALSE	FALSE	5.22	38.2	161	3.88	0.59	0.75	42.6	39	17	100	1	2		2	2	0	0
2012-07-03	1	1-0879	2	7	2	2	2	2	2	39	11.9038	113	15.2	FALSE	FALSE	FALSE	FALSE	10.66	40.5	226	6.74	3.41	0.47	41.7	45	17	77	2	<LOD	2	2	2	0	0
2012-07-03	1	1-0880	2	6	1	2	2	2	2	39	16.8773	118	23.5	FALSE	FALSE	FALSE	FALSE	17.49	37.3	329	12.61	3.17	1.7	44.3	41	12	87	2	<LOD	2	2	2	0	0
2012-08-03	1	1-0881	1	2	2	1	2	2	2	39	12.9132	88	10	TRUE	FALSE	FALSE	FALSE	11.06	33.9	244	5.89	4.35	0.75	44.1	73	30	143	2	<LOD	2	2	2	0	2
2012-08-03	1	1-0882	1	7	3	1	2	2	2	38.8	11.8977	123	18	FALSE	FALSE	FALSE	FALSE	11.56	29.1	469	9.59	1.44	0.5	47.4	65	12	64	1	1		2	2	0	0
2012-09-03	1	1-0883	2	9	3	2	2	2	2	39.3	11.7347	140	23	FALSE	FALSE	FALSE	FALSE	3.9	41.4	190	2.12	1.39	0.38	45.6	53	22	72	1	1		1	1	1	1
2012-09-03	1	1-0884	2	11	2	2	2	2	2	39.1	18.7111	150	42.1	FALSE	FALSE	FALSE	FALSE	7.02	42.6	264	3.8	2.36	0.79	45	41	22	79	2	<LOD	2	2	2	0	3
2012-09-03	1	1-0885	1	12	3	1	2	2	1	38.8	11.5056	156	28	FALSE	FALSE	FALSE	FALSE	5.52	37.1	56	4.02	1.29	0.2	43.4	47	21	98	1	2		1	1	2	1
2012-12-03	1	1-0886	2	5	2	2	1	2	2	39	10.5556	120	15.2	FALSE	FALSE	FALSE	FALSE	6.97	33	190	3.92	2.55	0.48	43.8	32	9	52	2	<LOD	2	2	2	0	0
2012-12-03	1	1-0887	1	9	3	2	1	2	2	38.7	17.0799	139	33	FALSE	FALSE	FALSE	FALSE	4.85	39.8	199	3.43	1.07	0.34	45.5	34	17	118	2	<LOD	2	2	2	0	0
3/13/12 12:00 AM	1	1-0888	1	4	1	2	2	2	2	38.6	20	100	20	FALSE	FALSE	FALSE	FALSE	10.16	35.2	333	6.93	2.29	0.8	42.2	37	12	122	2	<LOD	2	2	2	0	0
3/13/12 12:00 AM	1	1-0889	2	2	2	2	2	2	2	38.8	11.1111	90	9	FALSE	FALSE	FALSE	FALSE	6.94	30.7	215	4.13	2.19	0.59	39.2	49	13	112	2	<LOD	2	2	2	0	0
3/13/12 12:00 AM	1	1-0890	1	3	3	2	2	2	2	38.8	23.6295	92	20	FALSE	FALSE	FALSE	FALSE	9.85	35.1	282	6.35	2.45	1	43.3	34	12	102	2	<LOD	2	2	2	0	0
3/13/12 12:00 AM	1	1-0891	2	6	3	2	2	2	2	38.7	15.5356	119	22	FALSE	FALSE	FALSE	FALSE	10.06	37.8	195	4.27	4.93	0.64	39.2	39	19	73	1	2		2	1	1	2
3/13/12 12:00 AM	1	1-0892	1	5	3	2	2	2	2	39	14.9707	119	21.2	FALSE	FALSE	FALSE	FALSE	10.75	33.4	221	7.48	2.46	0.75	41.7	31	11	74	2	<LOD	2	2	2	0	0
3/14/12 12:00 AM	1	1-0893	1	8	1	2	2	2	2	39.3	16.2197	136	30	FALSE	FALSE	FALSE	FALSE	13.65	34.3	181	11.24	1.27	1.09	45	33	16	98	2	<LOD	2	2	2	0	0
3/14/12 12:00 AM	1	1-0894	2	3	2	2	2	2	2	39.2	15	100	15	FALSE	FALSE	FALSE	FALSE	12.51	36.7	250	6.71	4.79	0.95	43.5	32	14	83	2	<LOD	2	2	2	0	0
3/14/12 12:00 AM	1	1-0895	2	11	3	2	2	2	2	39.3	11.8906	145	25	FALSE	FALSE	FALSE	FALSE	10.52	36.9	329	9.02	1	0.47	41.7	42	11	65	2	<LOD	2	2	2	0	0
3/15/12 12:00 AM	1	1-0896	1	2	2	1	2	2	2	39	15.0948	91	12.5	FALSE	FALSE	FALSE	FALSE	6.23	35.5	364	4.01	1.75	0.47	41.9	49	19	121	2	<LOD	2	2	2	0	0
3/15/12 12:00 AM	1	1-0897	1	5	3	2	2	2	2	38.7	13.9887	115	18.5	FALSE	FALSE	FALSE	FALSE	5.5	35	229	1.91	3.14	0.41	41.1	53	16	102	2	<LOD	2	2	2	0	0
3/15/12 12:00 AM	1	1-0898	2	7	3	1	2	2	2	39.2	16.2591	124	25	FALSE	FALSE	FALSE	FALSE	3.14	38.6	139	1.17	1.77	0.2	42	45	16	104	2	<LOD	2	2	2	0	2
3/15/12 12:00 AM	1	1-0899	1	6	3	2	2	2	2	38.7	15.5356	119	22	FALSE	FALSE	FALSE	FALSE	9.29	38.1	263	5.18	3.47	0.58	41.8	37	7	83	2	<LOD	2	2	2	0	0
3/15/12 12:00 AM	1	1-0900	1	11	3	2	2	2	2	39	12.7383	156	31	FALSE	FALSE	FALSE	FALSE	5.47	40.9	130	3.29	1.65	0.52	48.6	40	15	93	2	<LOD	2	2	2	0	0
3/16/12 12:00 AM	1	1-0901	2	6	2	2	1	2	2	39	15.8001	118	22	FALSE	FALSE	FALSE	FALSE	15.73	37.7	291	10.77	4.01	0.92	42.7	32	9	191	2	<LOD	2	2	2	0	0
3/16/12 12:00 AM	1	1-0902	1	9	1	2	1	2	2	38.8	15.8163	140	31	FALSE	FALSE	FALSE	FALSE	7.96	38.8	221	6.56	0.92	0.41	43.1	27	9	60	2	<LOD	2	2	2	0	0
3/19/12 12:00 AM	1	1-0903	1	7	2	2	2	2	2	38.6	19.6184	122	29.2	FALSE	FALSE	FALSE	FALSE	3.61	35.4	210	1.49	1.81	0.26	37	51	23	171	2	<LOD	2	2	2	0	0
3/19/12 12:00 AM	1	1-0904	1	4	2	2	2	2	2	38.7	15.6185	98	15	FALSE	FALSE	FALSE	FALSE	4.81	31.4	174	3.04	1.32	0.4	38.3	35	10	120	2	<LOD	2	2	2	0	0
3/19/12 12:00 AM	1	1-0905	1	2	1	2	2	2	2	39	14.2045	88	11	FALSE	FALSE	FALSE	FALSE	15.36	36.3	242	7.77	6.12	1.31	41.7	41	26	42	2	<LOD	2	2	2	0	0
3/19/12 12:00 AM	1	1-0906	2	7	2	2	2	2	2	39.5	12.9773	121	19	FALSE	FALSE	FALSE	FALSE	4.38	40.5	171	3.09	0.84	0.43	44.7	48	16	272	2	<LOD	2	2	2	0	0
3/19/12 12:00 AM	1	1-0907	2	3	1	2	2	2	2	38.6	11.5437	94	10.2	FALSE	FALSE	FALSE	FALSE	5.68	34.6	341	3.73	1.44	0.49	41.7	57	16	123	2	<LOD	2	2	2	0	2
3/19/12 12:00 AM	1	1-0908	2	4	1	2	2	2	2	39	14.1059	96	13	FALSE	FALSE	FALSE	FALSE	21	38.2	476	16.62	3.45	0.91	43.8	32	12	53	2	<LOD	2	2	2	0	0
3/20/12 12:00 AM	1	1-0909	1	8	3	2	2	2	2	38.6	16.2781	138	31	FALSE	FALSE	FALSE	FALSE	4.03	49.6	101	1.57	2.12	0.34	37.9	36	9	118	2	<LOD	2	2	2	0	2
3/20/12 12:00 AM	1	1-0910	2	8	3	2	2	2	2	38.6	9.89315	133	17.5	FALSE	FALSE	FALSE	FALSE	10.02	41	293	6.93	2.34	0.73	46.5	27	11	54	2	<LOD	2	2	2	0	0
3/20/12 12:00 AM	1	1-0911	2	3	2	2	2	2	2	38.7	13.8744	93	12	FALSE	FALSE	FALSE	FALSE	18.19	32.5	311	13.42	3.6	1.1	37.2	39	14	48	2	<LOD	2	2	2	0	0
3/20/12 12:00 AM	1	1-0912	2	9	2	2	2	2	2	38.6	17.0927	116	23	FALSE	FALSE	FALSE	FALSE	5.54	35.6	273	2.19	2.81	0.44	42.4	35	13	72	2	<LOD	2	2	2	0	0
3/21/12 12:00 AM	1	1-0913	1	13	3	1	2	2	2	39.1	10.2728	156	25	FALSE	FALSE	FALSE	FALSE	5.56	42.6	303	4.22	1.14	0.2	46.3	39	13	230	2	<LOD	2	2	2	0	0
3/21/12 12:00 AM	1	1-0914	2	4	3	2	2	2	2	38.7	14.8794	97	14	FALSE	FALSE	FALSE	FALSE	10.25	37.1	198	6.02	3.45	0.66	43.7	44	14	105	2	<LOD	2	2	2	0	0
3/21/12 12:00 AM	1	1-0915	1	3	1	2	2	2	2	38.6	17.7221	92	15	FALSE	FALSE	FALSE	FALSE	10.01	36.7	298	4.39	4.48	1.03	42.6	50	21	184	2	<LOD	2	2	2	0	0
3/21/12 12:00 AM	1	1-0916	1	5	2	2	2	2	2	38.5	15.1229	115	20	FALSE	FALSE	FALSE	FALSE	8.63	36.8	320	3.43	4.49	0.29	43.9	35	22	148	2	<LOD	2	2	2	0	0
3/21/12 12:00 AM	1	1-0917	1	2	3	2	2	2	2	38.7	21.3068	88	16.5	FALSE	FALSE	FALSE	FALSE	7.92	39.2	400	3.45	2.86	1.59	38.5	39	28	35	2	<LOD	2	2	2	0	0
3/22/12 12:00 AM	1	1-0918	1	5	2	2	2	2	2	38.7	10.7725	114	14	FALSE	FALSE	FALSE	FALSE	13.63	37.1	346	8.24	3.77	1.51	40.1	35	11	54	2	<LOD	2	2	2	0	0
3/23/12 12:00 AM	1	1-0919	1	9	2	1	2	2	2	38.6	17.2364	118	24	FALSE	FALSE	FALSE	FALSE	2.4	41.5	133	0.91	1.21	0.27	41.9	82	41	174	1	1		1	2	0	0
3/26/12 12:00 AM	1	1-0920	1	9	3	2	2	2	1	39	19.391	118	27	FALSE	FALSE	FALSE	FALSE	4.15	37.8	137	2.48	1.39	0.19	41.9	47	16	88	1	1		2	1	1	1
3/27/12 12:00 AM	1	1-0921	1	3	3	2	2	2	2	38.6	21.0526	95	19	TRUE	FALSE	FALSE	FALSE	9.81	37.3	81	5.65	3.36	0.68	41.2	57	26	139	2	<LOD	2	2	2	0	0
3/27/12 12:00 AM	1	1-0922	1	5	3	1	1	2	2	39.2	12.9273	118	18	TRUE	FALSE	FALSE	FALSE	6.66	38.1	312	2.03	4.05	0.52	42.2	44	24	192	2	<LOD	2	2	2	0	0
3/28/12 12:00 AM	1	1-0923	1	13	3	2	2	2	2	38.6	16.7969	160	43	TRUE	FALSE	FALSE	FALSE	3.55	46.2	172	2.1	1.1	0.34	46.9	40	19	114	2	<LOD	2	2	2	0	2
3/28/12 12:00 AM	1	1-0924	1	4	2	2	2	2	2	38.8	19.5312	96	18	FALSE	FALSE	FALSE	FALSE	8.31	37.4	285	6.76	0.99	0.46	44.2	39	14	78	1	3		1	2	0	0
3/28/12 12:00 AM	1	1-0925	2	11	2	2	2	2	2	39.2	24	150	54	FALSE	FALSE	FALSE	FALSE	7.9	34.4	253	4.59	2.68	0.61	39.6	83	54	66	1	1		1	2	0	0
3/28/12 12:00 AM	1	1-0926	1	7	1	2	2	2	1	39.3	14.1091	122	21	FALSE	FALSE	FALSE	FALSE	5.03	39.8	88	3	1.63	0.4	41.8	38	12	76	2	<LOD	2	2	2	0	0
3/28/12 12:00 AM	1	1-0927	2	6	3	2	1	2	2	37.8	12.6338	116	17	FALSE	FALSE	FALSE	FALSE	4.74	39.7	270	2.39	1.92	0.43	44.4	48	17	72	2	<LOD	2	2	2	0	0
3/28/12 12:00 AM	1	1-0928	2	12	3	2	2	2	1	39.2	19.3962	154	46	FALSE	FALSE	FALSE	FALSE	2.21	41.7	188	0.96	1.04	0.2	42.9	43	17	99	1	1		1	2	0	0
3/28/12 12:00 AM	1	1-0929	1	12	3	1	2	2	1	39.1	18.0802	156	44	FALSE	FALSE	FALSE	FALSE	2.33	46.2	74	0.85	1.36	0.12	44.3	234	83	318	1	1		1	2	0	1
3/28/12 12:00 AM	1	1-0930	1	4	3	2	2	2	2	38.9	12.7537	97	12	FALSE	FALSE	FALSE	FALSE	4.4	37	97	4.4	2.9	1.1	41.2	118	58	143	2	<LOD	2	2	2	0	0
3/28/12 12:00 AM	1	1-0931	1	4	3	2	2	2	2	38.8	12.7537	97	12	FALSE	FALSE	FALSE	FALSE	10.1	33.4	235	5.5	3.8	0.9	41.7	44	16	115	2	<LOD	2	2	2	0	0
3/28/12 12:00 AM	1	1-0932	2	7	3	2	2	2	2	39	18.8121	122	28	FALSE	FALSE	FALSE	FALSE	14.2	39.8	296	10.5	2.8	0.9	46.7	44	18	127	2	<LOD	2	2	2	0	0
3/30/12 12:00 AM	1	1-0933	1	2	1	2	2	2	2	38.7	15.1936	87	11.5	FALSE	FALSE	FALSE	FALSE	11.07	35.7	228	8.82	1.5	0.73	48	67	26	274	2	<LOD	2	2	2	0	0
3/30/12 12:00 AM	1	1-0934	1	2	2	1	2	2	2	38.9	18.424	84	13	FALSE	FALSE	FALSE	FALSE	20.26	35.9	340	11.91	6.28	2.01	42.3	31	20	156	2	<LOD	2	2	2	0	0
3/30/12 12:00 AM	1	1-0935	1	10	2	1	2	2	2	39.2	17.5981	145	37	FALSE	FALSE	FALSE	FALSE	9.65	35.9	248	6.87	2.22	0.53	45.7	28	17	87	2	<LOD	2	2	2	0	0
3/30/12 12:00 AM	1	1-0936	2	2	3	2	2	2	2	38.9	15.5896	84	11	FALSE	FALSE	FALSE	FALSE	15.58	39.1	353	7.71	6.75	1.08	43	39	17	87	2	<LOD	2	2	2	0	0
3/30/12 12:00 AM	1	1-0937	1	2	1	1	2	2	2	38.6	15.6157	82	10.5	FALSE	FALSE	FALSE	FALSE	11.22	33.3	579	5.7	4.32	1.09	39.3	27	18	39	2	<LOD	2	2	2	0	2
3/30/12 12:00 AM	1	1-0938	1	6	2	1	2	2	2	39	13.6455	118	19	FALSE	FALSE	FALSE	FALSE	12.7	44	377	10.27	1.71	0.71	41.4	41	18	49	2	<LOD	2	2	2	0	0
3/30/12 12:00 AM	1	1-0939	1	2	2	2	2	2	2	38.7	13.3849	82	9	FALSE	FALSE	FALSE	FALSE	14.14	34.1	375	8.98	4.25	0.87	44.8	43	14	58	2	<LOD	2	2	2	0	0
2012-03-04	1	1-0940	1	7	3	2	2	2	2	39	17.8465	123	27	FALSE	FALSE	FALSE	FALSE	8.84	39.8	257	6	2.1	0.73	42.6	34	9	84	2	<LOD	2	2	2	0	0
2012-03-04	1	1-0941	1	2	3	2	2	2	2	39.1	17.1753	87	13	FALSE	FALSE	FALSE	FALSE	12.3	41	272	4.86	5.87	1.52	45.7	46	13	49	2	<LOD	2	2	2	0	0
2012-03-04	1	1-0942	2	7	3	2	2	2	2	38.9	11.8977	123	18	FALSE	FALSE	FALSE	FALSE	11.67	35.6	210	7.42	2.96	1.26	42	50	15	142	2	<LOD	2	2	2	0	0
2012-04-04	1	1-0943	1	3	2	1	2	2	2	39	15.6986	91	13	FALSE	FALSE	FALSE	FALSE	12.74	35.5	281	7.6	4.08	1.03	43.6	42	13	102	2	<LOD	2	2	2	0	0
2012-04-04	1	1-0944	2	4	2	1	2	2	2	38.8	17.3611	96	16	FALSE	FALSE	FALSE	FALSE	5.55	37.2	221	2.53	2.48	0.51	42.6	36	6	88	2	<LOD	2	2	2	0	2
2012-04-04	1	1-0945	2	2	3	2	2	2	2	38.7	15.2416	81	10	FALSE	FALSE	FALSE	FALSE	7.47	33.7	194	1.62	5.1	0.71	44	42	17	75	2	<LOD	2	2	2	0	0
2012-05-04	1	1-0946	1	6	1	1	2	2	2	38.8	11.491	118	16	FALSE	FALSE	FALSE	FALSE	8.95	39.8	481	5.29	2.91	0.59	46.1	39	11	285	2	<LOD	2	2	2	0	0
2012-06-04	1	1-0947	1	8	3	2	2	2	2	38.7	10.8131	136	20	TRUE	FALSE	FALSE	FALSE	5.63	32.6	244	4.06	1.2	0.25	38.4	29	12	177	2	<LOD	2	2	2	0	0
2012-06-04	1	1-0948	1	1	3	1	2	1	2	38.9	12.5	80	8	FALSE	FALSE	FALSE	FALSE	14	33.5	410	6.82	5.86	1.24	42.7	31	14	66	2	<LOD	2	2	2	0	0
2012-09-04	1	1-0949	1	14	1	1	2	2	2	38.6	12.0173	158	30	TRUE	FALSE	FALSE	FALSE	9.65	39.1	150	8.79	0.41	0.41	47.2	20	10	76	1	2		1	2	0	0
2012-09-04	1	1-0950	2	10	2	2	2	2	2	37.9	11.2591	146	24	FALSE	FALSE	FALSE	TRUE	6.75	39.1	265	3.75	2.31	0.68	44.6	29	17	109	2	<LOD	2	2	2	0	2
2012-10-04	1	1-0951	1	7	2	2	2	2	2	39	16.3769	126	26	FALSE	FALSE	FALSE	FALSE	5.04	37.2	204	2.35	2.26	0.39	41	61	12	102	2	<LOD	2	2	2	0	0
2012-11-04	1	1-0952	1	7	2	2	1	2	2	39	13.8806	123	21	FALSE	FALSE	FALSE	FALSE	14.97	37.5	320	10.74	2.98	1.23	40.7	34	11	58	2	<LOD	2	2	2	0	0
2012-11-04	1	1-0953	2	8	2	2	2	2	2	38.5	10.9739	135	20	FALSE	FALSE	FALSE	TRUE	8.29	39.3	208	3.82	3.91	0.54	47	59	17	131	2	<LOD	2	2	2	0	0
2012-12-04	1	1-0954	2	3	3	2	2	2	2	38.8	14.4044	95	13	FALSE	FALSE	FALSE	FALSE	6.53	35.3	208	1.54	4.19	0.79	42.1	52	11	103	2	<LOD	2	2	2	0	0
4/13/12 12:00 AM	1	1-0955	2	2	2	1	2	1	1	39	13.9353	83	9.6	TRUE	FALSE	FALSE	FALSE	13.72	35.5	303	8.1	4.09	1.48	44.1	36	16	51	2	<LOD	2	2	2	0	0
4/13/12 12:00 AM	1	1-0956	1	5	2	1	2	2	2	38.9	12.6338	116	17	TRUE	FALSE	FALSE	FALSE	5.45	41.4	235	0.91	4.01	0.4	45.6	52	17	79	2	<LOD	2	2	2	0	0
4/16/12 12:00 AM	1	1-0957	1	12	2	2	2	2	2	38.8	22.7694	154	54	FALSE	FALSE	FALSE	FALSE	14.07	43.2	436	11.49	1.61	0.94	46.7	36	24	67	2	<LOD	2	2	2	0	0
4/18/12 12:00 AM	1	1-0958	1	6	2	2	2	2	2	39.2	12.5	120	18	FALSE	FALSE	FALSE	FALSE	6.1	42.8	192	2.49	3.25	0.35	46.6	52	17	116	2	<LOD	2	2	2	0	0
4/18/12 12:00 AM	1	1-0959	1	4	2	2	2	2	2	39	13.536	98	13	FALSE	FALSE	FALSE	FALSE	7.57	36.2	265	4.78	2.12	0.62	43.6	48	17	91	2	<LOD	2	2	2	0	0
4/18/12 12:00 AM	1	1-0960	1	3	3	2	2	2	2	38.8	14.1777	92	12	FALSE	FALSE	FALSE	FALSE	11.3	33.8	239	6.75	3.67	0.84	40.6	42	18	92	2	<LOD	2	2	2	0	0
4/18/12 12:00 AM	1	1-0961	1	7	2	2	2	2	2	38.7	20.7101	130	35	FALSE	FALSE	FALSE	FALSE	13.57	41.1	470	9.25	3.15	1.15	46.1	24	9	53	2	<LOD	2	2	2	0	0
4/18/12 12:00 AM	1	1-0962	1	3	2	2	2	2	2	39.4	21.9679	93	19	FALSE	FALSE	FALSE	FALSE	8.09	36.9	264	4.13	3.23	0.59	44.3	33	15	145	2	<LOD	2	2	2	0	0
4/18/12 12:00 AM	1	1-0963	1	4	2	2	2	2	2	38.9	26.5703	97	25	FALSE	FALSE	FALSE	FALSE	18.19	35.3	325	12.55	4.39	1.1	44.1	35	14	69	2	<LOD	2	2	2	0	0
4/19/12 12:00 AM	1	1-0964	1	9	3	2	2	2	2	39.2	16.8367	140	33	FALSE	FALSE	FALSE	FALSE	4.82	37.4	188	2.68	1.74	0.39	40.4	47	28	95	2	<LOD	2	2	2	0	0
4/19/12 12:00 AM	1	1-0965	1	4	3	2	2	2	2	38.7	18.0678	97	17	FALSE	FALSE	FALSE	FALSE	9.01	35.3	215	4.94	3.04	0.94	42	38	14	108	2	<LOD	2	2	2	0	0
4/20/12 12:00 AM	1	1-0966	2	4	2	2	2	2	2	39.5	16.3249	99	16	FALSE	FALSE	FALSE	FALSE	8.02	35	176	4.54	2.43	1.04	40.2	270	238	133	2	<LOD	2	2	2	0	0
4/20/12 12:00 AM	1	1-0967	1	14	2	1	2	2	2	38.7	23.4375	160	60	FALSE	FALSE	FALSE	FALSE	5.55	45.4	180	4.36	0.87	0.31	42.9	51	31	98	2	<LOD	2	2	2	0	2
4/20/12 12:00 AM	1	1-0968	1	15	3	1	2	2	1	38.6	27.5482	165	75	TRUE	FALSE	FALSE	FALSE	3.8	49	93	1.7	1.5	0.6	46.3	78	35	312	1	4		1	1	2	1
4/23/12 12:00 AM	1	1-0969	1	4	2	2	2	2	2	38.7	15.0979	98	14.5	TRUE	FALSE	FALSE	FALSE	11.92	35.1	404	4.86	6.5	0.5	43.4	33	6	52	2	<LOD	2	2	2	0	0
4/23/12 12:00 AM	1	1-0970	1	10	2	2	2	2	2	39.3	11.5522	138	22	TRUE	FALSE	FALSE	FALSE	4.88	43.7	248	2.57	1.72	0.57	43.3	51	17	223	2	<LOD	2	2	2	0	0
4/23/12 12:00 AM	1	1-0971	2	2	1	2	2	2	2	38.8	13.6054	84	9.6	TRUE	FALSE	FALSE	FALSE	5.82	35.1	181	2.73	2.65	0.42	44.9	63	22	178	2	<LOD	2	2	2	0	0
4/23/12 12:00 AM	1	1-0972	1	5	2	2	2	2	2	38.7	9.66112	116	13	TRUE	FALSE	FALSE	FALSE	7.08	35.3	270	2.29	4.03	0.74	41.5	36	8	63	2	<LOD	2	2	2	0	0
4/23/12 12:00 AM	1	1-0973	1	2	2	1	2	2	2	39.4	16.0037	81	10.5	TRUE	FALSE	FALSE	FALSE	10.01	34.8	226	5.98	3.2	0.82	42.6	53	26	193	2	<LOD	2	2	2	0	0
4/24/12 12:00 AM	1	1-0974	1	6	2	2	2	2	2	38.7	14.8295	119	21	TRUE	FALSE	FALSE	FALSE	8.13	37.5	287	3.99	2.64	0.8	42.8	57	19	157	2	<LOD	2	2	2	0	2
4/24/12 12:00 AM	1	1-0975	2	1	2	2	2	2	2	39	11.25	80	7.2	TRUE	FALSE	FALSE	FALSE	12.28	32.5	474	1.47	10.34	0.39	45.1	56	20	301	2	<LOD	2	2	2	0	0
4/24/12 12:00 AM	1	1-0976	1	3	3	2	2	2	2	38.8	22.6347	94	20	TRUE	FALSE	FALSE	FALSE	15.31	39.5	204	7.62	6.47	1.19	45.6	57	9	180	2	<LOD	2	2	2	0	0
4/24/12 12:00 AM	1	1-0977	2	9	2	1	2	2	2	38.8	21.4286	140	42	FALSE	FALSE	FALSE	FALSE	3.49	44.1	171	1.78	1.31	0.39	45.5	44	8	79	2	<LOD	2	2	2	0	0
4/25/12 12:00 AM	1	1-0978	1	12	3	2	2	2	2	38.8	11.3847	154	27	TRUE	FALSE	FALSE	FALSE	3.73	42.5	227	1.86	1.61	0.21	44.7	81	38	285	1	1		1	2	0	0
4/26/12 12:00 AM	1	1-0979	2	5	2	1	1	2	2	38.9	9.88631	119	14	TRUE	FALSE	FALSE	FALSE	4.69	40.2	206	3.29	1.26	0.13	41.8	61	14	128	2	<LOD	2	2	2	0	0
4/26/12 12:00 AM	1	1-0980	1	8	2	1	2	2	2	39.2	10.869	139	21	TRUE	FALSE	FALSE	FALSE	20.67	44.3	416	15.71	4.3	0.62	46.1	29	16	48	2	<LOD	2	2	2	0	0
4/26/12 12:00 AM	1	1-0981	2	5	3	2	1	2	2	38.5	9.66112	116	13	TRUE	FALSE	FALSE	FALSE	8.43	37.1	241	3.66	3.98	0.36	40.9	39	15	66	2	<LOD	2	2	2	0	0
4/26/12 12:00 AM	1	1-0982	2	5	1	2	2	2	2	39.5	12.0535	117	16.5	TRUE	FALSE	FALSE	FALSE	9.38	39	258	5.57	3.09	0.71	45.3	44	12	108	2	<LOD	2	2	2	0	0
4/27/12 12:00 AM	1	1-0983	2	2	2	1	2	2	2	38.9	17.0068	84	12	TRUE	FALSE	FALSE	FALSE	8.7	34.9	288	4.25	3.64	0.8	38.6	41	17	86	2	<LOD	2	1	2	0	2
2012-03-05	1	1-0984	2	9	3	2	2	2	2	38.7	23.6111	120	34	FALSE	FALSE	FALSE	FALSE	4.15	36.9	262	1.03	2.67	0.45	45.3	30	16	84	2	<LOD	2	2	2	0	0
2012-04-05	1	1-0985	2	2	2	2	2	2	2	38.8	10.8507	96	10	FALSE	FALSE	FALSE	FALSE	7.43	34.7	208	3.18	3.77	0.47	45	43	14	102	2	<LOD	2	2	2	0	0
2012-04-05	1	1-0986	1	3	2	2	2	2	2	38.7	11.9742	98	11.5	FALSE	FALSE	FALSE	FALSE	10.58	31.1	368	2.41	6.75	1.37	44.9	39	15	44	2	<LOD	2	2	2	0	0
2012-08-05	1	1-0987	1	9	3	1	1	1	1	39.1	19.4287	138	37	TRUE	FALSE	FALSE	TRUE	2.91	39.7	139	1.83	0.92	0.16	42.8	62	29	176	1	1		1	2	0	0
2012-09-05	1	1-0988	1	8	2	2	2	2	2	38.8	15.5271	139	30	FALSE	FALSE	FALSE	FALSE	9.63	37.1	268	6.16	2.9	0.56	44.1	47	12	152	2	<LOD	2	2	2	0	0
2012-09-05	1	1-0989	1	2	2	2	2	2	2	39.2	17.0433	89	13.5	FALSE	FALSE	FALSE	FALSE	11.81	37.3	201	7.12	3.82	0.82	41.9	40	15	69	2	<LOD	2	2	2	0	0
2012-09-05	1	1-0990	1	12	3	2	2	2	2	39	24.7768	153	58	FALSE	FALSE	FALSE	FALSE	10.7	38.7	355	5.1	5	0.6	46.3	22	16	117	2	<LOD	2	2	2	0	0
2012-10-05	1	1-0991	2	6	2	2	2	2	1	39.2	17.3611	120	25	FALSE	FALSE	FALSE	FALSE	4.7	41.4	176	3.44	1.05	0.2	45.3	36	18	105	2	<LOD	2	2	2	0	0
2012-11-05	1	1-0992	2	5	1	2	2	2	2	39.2	13.8798	117	19	FALSE	FALSE	FALSE	FALSE	5.69	34.4	330	3.07	2.02	0.58	39.2	41	15	125	2	<LOD	2	2	2	0	2
5/14/12 12:00 AM	1	1-0993	2	5	3	1	2	2	1	38.9	12.2622	116	16.5	FALSE	FALSE	FALSE	FALSE	10.01	42.2	81	7.65	2.05	0.28	40.3	144	38	91	1	2		2	1	2	1
5/15/12 12:00 AM	1	1-0994	1	5	2	1	2	1	2	39	11.1474	116	15	FALSE	FALSE	FALSE	FALSE	7.67	39.1	196	5.85	1.28	0.54	43	40	10	179	2	<LOD	2	2	2	0	0
5/16/12 12:00 AM	1	1-0995	1	9	2	1	2	2	2	39	12.7551	140	25	FALSE	FALSE	FALSE	FALSE	2.45	41.1	177	1.53	0.84	0.08	40.7	73	29	77	1	2		1	2	0	0
5/16/12 12:00 AM	1	1-0996	2	2	2	2	2	2	2	38.9	14.1975	90	11.5	FALSE	FALSE	FALSE	FALSE	17.93	35.4	245	12.18	4.77	0.96	46.5	35	10	106	2	<LOD	2	2	2	0	0
5/16/12 12:00 AM	1	1-0997	2	5	2	2	2	1	2	38.7	10.4043	116	14	FALSE	FALSE	FALSE	FALSE	5.56	39.1	208	3.83	1.34	0.38	43.8	44	7	77	2	<LOD	2	2	2	0	0
5/17/12 12:00 AM	1	1-0998	1	2	2	2	2	2	2	39	12.2676	88	9.5	TRUE	FALSE	FALSE	FALSE	9.57	33.1	313	4.79	3.99	0.77	42.9	45	20	67	2	<LOD	2	2	2	0	0
5/17/12 12:00 AM	1	1-0999	2	8	3	1	2	2	2	38.9	13.366	134	24	FALSE	FALSE	FALSE	FALSE	3.8	48.4	117	2.5	0.9	0.3	40.3	85	24	352	1	3		2	2	0	0
5/18/12 12:00 AM	1	1-1000	2	4	1	2	2	2	2	39.1	18.9036	92	16	FALSE	FALSE	FALSE	FALSE	9.55	38.2	242	6.58	2.27	0.54	41.3	45	16	107	2	<LOD	2	2	2	0	0
5/18/12 12:00 AM	1	1-1001	2	1	2	2	2	2	2	38.7	11.2223	86	8.3	FALSE	FALSE	FALSE	FALSE	4.55	36.9	174	1.77	2.36	0.42	43.6	154	154	188	2	<LOD	2	2	2	0	0
5/21/12 12:00 AM	1	1-1002	2	3	1	1	1	2	2	39.5	19.3858	99	19	TRUE	FALSE	FALSE	FALSE	9.28	36.2	195	6.67	1.7	0.88	47.9	46	25	182	2	<LOD	2	2	2	0	0
5/21/12 12:00 AM	1	1-1003	1	4	3	1	1	1	1	39	13.7741	99	13.5	FALSE	FALSE	FALSE	FALSE	6.29	37.1	218	4.64	1.17	0.45	44.4	346	133	76	1	4		1	1	2	1
5/21/12 12:00 AM	1	1-1004	1	12	2	2	2	2	2	39.1	14.2222	150	32	FALSE	FALSE	FALSE	FALSE	10	42.2	282	7.43	1.92	0.63	39.7	28	13	100	2	<LOD	2	2	2	0	0
5/21/12 12:00 AM	1	1-1005	2	2	2	1	2	2	2	39	12.7551	84	9	TRUE	FALSE	FALSE	FALSE	15.5	33.1	214	3.2	8.4	3.9	40	214	304	105	2	<LOD	2	2	2	0	0
5/21/12 12:00 AM	1	1-1006	1	9	2	2	2	2	2	39	13.9151	138	26.5	TRUE	FALSE	FALSE	TRUE	8.14	37.1	231	5.65	1.88	0.59	45	39	20	69	2	<LOD	2	2	2	0	0
5/22/12 12:00 AM	1	1-1007	1	4	2	2	2	2	2	40	17	100	17	FALSE	FALSE	FALSE	FALSE	10.62	37.5	269	7.09	3.12	0.37	43.5	32	13	105	2	<LOD	2	2	2	0	0
5/24/12 12:00 AM	1	1-1008	1	7	3	2	2	2	2	38.7	14.781	122	22	TRUE	FALSE	FALSE	FALSE	6.64	38.7	158	4.14	2.14	0.36	44.8	49	14	153	2	<LOD	2	2	2	0	0
5/24/12 12:00 AM	1	1-1009	1	5	2	2	2	2	2	38.9	12.2091	118	17	FALSE	FALSE	FALSE	FALSE	7.65	38.8	357	3.8	3.12	0.68	45.3	62	22	128	2	<LOD	2	2	2	0	0
5/24/12 12:00 AM	1	1-1010	2	5	2	1	1	2	2	38.7	20.1092	118	28	TRUE	FALSE	FALSE	FALSE	8.75	37.4	290	5.39	2.76	0.52	41.4	40	24	107	2	<LOD	2	2	2	0	0
5/24/12 12:00 AM	1	1-1011	1	2	3	2	2	2	2	39	13.4637	84	9.5	TRUE	FALSE	FALSE	TRUE	6.6	37.4	164	2.32	3.8	0.45	44	38	12	68	2	<LOD	2	2	2	0	2
5/25/12 12:00 AM	1	1-1012	2	11	2	1	1	2	2	39.3	18.7962	153	44	TRUE	FALSE	FALSE	FALSE	4.07	41.5	83	3.1	0.76	0.21	38.3	96	86	147	1	2		1	1	2	1
5/25/12 12:00 AM	1	1-1013	1	8	1	2	2	2	2	39.3	20.9184	140	41	FALSE	FALSE	FALSE	FALSE	5.1	37.3	205	3.6	1	0.4	45.5	29	18	60	1	4		2	2	0	0
5/28/12 12:00 AM	1	1-1014	2	9	1	2	2	2	1	38.6	16.8032	138	32	FALSE	FALSE	FALSE	FALSE	3.41	39.4	111	1.66	1.42	0.3	41.3	41	15	130	1	4		1	1	2	1
5/28/12 12:00 AM	1	1-1015	1	7	2	2	1	2	1	38.8	11.78	127	19	TRUE	FALSE	FALSE	FALSE	7.44	32.4	162	3.74	3.12	0.56	39.9	42	15	159	2	<LOD	2	2	2	0	0
5/28/12 12:00 AM	1	1-1016	1	14	3	2	2	2	1	39.3	13.493	154	32	FALSE	FALSE	FALSE	FALSE	3.27	39.2	147	1.42	1.52	0.32	46.2	33	19	176	2	<LOD	2	2	2	0	0
5/29/12 12:00 AM	1	1-1017	2	4	1	2	2	2	2	39.5	14.8794	97	14	FALSE	FALSE	FALSE	FALSE	8.79	36.8	236	6.08	1.84	0.83	44.1	39	13	65	2	<LOD	2	2	2	0	0
5/30/12 12:00 AM	1	1-1018	1	9	3	2	2	2	2	38.7	18.3785	138	35	FALSE	FALSE	FALSE	FALSE	5.72	40.5	238	2.92	2.51	0.29	44.3	80	90	59	2	<LOD	2	2	2	0	0
5/31/12 12:00 AM	1	1-1019	1	4	2	2	2	2	2	38.9	16.3249	99	16	FALSE	FALSE	FALSE	FALSE	4.4	35.7	209	3.1	0.7	0.6	43.8	40	8	128	2	<LOD	2	2	2	0	0
5/31/12 12:00 AM	1	1-1020	1	9	2	2	2	2	2	40	10.2041	140	20	FALSE	FALSE	FALSE	FALSE	10.6	32	213	8.8	1.1	0.7	45.2	38	9	84	2	<LOD	2	2	2	0	2
2012-01-06	1	1-1021	2	3	2	2	2	2	2	39	21.9679	93	19	FALSE	FALSE	FALSE	FALSE	11.37	38.8	224	8.33	2.01	1.02	45.1	51	16	81	2	<LOD	2	2	2	0	0
2012-04-06	1	1-1022	1	11	2	2	2	2	2	38.9	13.2444	150	29.8	FALSE	FALSE	FALSE	FALSE	11.1	38.5	233	8.07	1.25	0.65	41.7	37	15	85	2	<LOD	2	2	2	0	0
2012-04-06	1	1-1023	1	4	3	2	2	2	1	38.8	16.276	96	15	FALSE	FALSE	FALSE	FALSE	3.44	40.8	218	0.9	2.11	0.42	45.9	72	29	248	2	<LOD	2	2	2	0	0
2012-06-06	1	1-1024	2	8	2	1	2	2	1	38.8	15.6087	124	24	TRUE	FALSE	FALSE	TRUE	5.08	40.1	119	3.92	0.78	0.37	40.5	49	8	62	1	4		1	2	0	0
2012-06-06	1	1-1025	1	5	1	2	2	2	2	38.9	19.9546	105	22	FALSE	FALSE	FALSE	FALSE	12	37.2	218	8.31	2.49	1.17	42.5	39	17	58	2	<LOD	2	2	2	0	0
2012-06-06	1	1-1026	2	1	1	2	2	2	2	39	13.2602	81	8.7	FALSE	FALSE	FALSE	FALSE	9.17	35.4	283	6.65	1.65	0.83	44.8	43	16	81	2	<LOD	2	2	2	0	0
2012-06-06	1	1-1027	2	1	3	2	2	2	2	39	14.375	80	9.2	FALSE	FALSE	TRUE	FALSE	6.45	34.3	128	0.94	4.9	0.39	40.5	50	23	96	2	<LOD	2	2	2	0	0
2012-06-06	1	1-1028	2	10	1	2	2	2	2	38.8	17.8417	136	33	FALSE	FALSE	FALSE	FALSE	9.54	34.8	269	5.51	2.77	1.04	44.6	29	14	56	2	<LOD	2	2	2	0	0
2012-06-06	1	1-1029	2	5	2	2	2	2	2	38.7	17.5323	117	24	TRUE	FALSE	FALSE	TRUE	8.14	35.7	229	4.55	2.97	0.54	43.2	41	16	80	2	<LOD	2	2	2	0	0
2012-06-06	1	1-1030	1	4	2	2	2	2	2	38.8	13.2852	97	12.5	TRUE	FALSE	FALSE	FALSE	7.65	34.2	294	5.55	1.2	0.82	39.4	40	13	96	2	<LOD	2	2	2	0	0
2012-06-06	1	1-1031	1	2	2	2	2	2	2	38.7	12.2676	88	9.5	TRUE	FALSE	FALSE	FALSE	10.12	32.7	299	6.35	2.6	1.13	41.4	41	25	56	2	<LOD	2	2	2	0	0
2012-07-06	1	1-1032	2	7	1	1	2	2	2	39	12.5976	126	20	FALSE	FALSE	FALSE	FALSE	14.43	39.2	257	12.13	1.42	0.84	42.6	45	18	122	2	<LOD	2	2	2	0	0
2012-07-06	1	1-1033	1	2	1	1	2	2	2	38.7	22.46	87	17	FALSE	FALSE	FALSE	FALSE	17.57	42.7	368	9.49	6.62	1.43	43.4	104	28	188	2	<LOD	2	2	2	0	2
2012-07-06	1	1-1034	2	3	2	1	2	2	2	39.2	18.9036	92	16	FALSE	FALSE	FALSE	FALSE	7.26	40.1	252	3.78	3.1	0.34	44.7	37	15	97	2	<LOD	2	2	2	0	0
2012-07-06	1	1-1035	2	1	2	2	2	2	2	38.9	14.0625	80	9	FALSE	FALSE	FALSE	FALSE	9.29	38.4	138	1.4	7.33	0.4	46.2	57	17	104	2	<LOD	2	2	2	0	0
2012-07-06	1	1-1036	1	8	3	1	2	2	2	39.2	23.1044	138	44	FALSE	FALSE	FALSE	FALSE	5	42.1	256	3.35	1.24	0.39	44.4	46	33	219	1	4		1	2	0	0
2012-08-06	1	1-1037	1	11	2	1	2	2	2	39.2	11.8064	154	28	FALSE	FALSE	FALSE	FALSE	5.92	40.9	150	4.72	0.81	0.38	42.1	39	20	101	1	1		1	1	2	1
2012-08-06	1	1-1038	1	3	2	1	2	2	2	38.7	25.464	94	22.5	FALSE	FALSE	FALSE	FALSE	7.99	34.2	315	5.02	2.19	0.66	41.3	45	16	152	2	<LOD	2	2	2	0	0
2012-08-06	1	1-1039	2	5	3	1	1	2	2	39.2	15.879	115	21	FALSE	FALSE	FALSE	FALSE	8.8	41.6	287	7.5	0.84	0.43	35.7	28	12	158	2	<LOD	2	2	2	0	0
2012-11-06	1	1-1040	1	15	1	1	2	2	2	38.9	19.2277	158	48	FALSE	FALSE	FALSE	FALSE	8.59	41.2	240	5.97	2.01	0.57	43.9	35	12	117	2	<LOD	2	2	2	0	0
2012-11-06	1	1-1041	1	2	1	2	2	2	2	38.8	15.7808	89	12.5	FALSE	FALSE	FALSE	FALSE	6.5	33.7	359	4.76	1.03	0.47	42.8	32	14	98	2	<LOD	2	2	2	0	0
2012-12-06	1	1-1042	1	12	3	2	2	2	2	39	17.8417	136	33	FALSE	FALSE	FALSE	FALSE	3.11	34	244	1.65	0.82	0.63	44.7	58	29	101	1	2		2	2	0	0
2012-12-06	1	1-1043	1	11	3	2	2	2	2	38.8	26.2845	142	53	FALSE	FALSE	FALSE	FALSE	4.41	40.1	170	2.81	1.11	0.43	39.5	53	53	86	1	4		1	2	0	0
2012-12-06	1	1-1044	2	9	2	2	2	2	2	39.1	14.308	124	22	TRUE	FALSE	TRUE	TRUE	3.54	37.6	86	2.57	0.77	0.2	42.5	42	20	67	1	1		1	1	1	2
6/13/12 12:00 AM	1	1-1045	2	7	1	2	2	2	2	39.3	15.0263	121	22	TRUE	FALSE	FALSE	TRUE	7.42	41	251	4.41	2.35	0.55	46.8	47	14	108	2	<LOD	2	2	2	0	0
6/13/12 12:00 AM	1	1-1046	2	4	1	2	2	2	2	39.5	13.536	98	13	TRUE	FALSE	FALSE	FALSE	9.57	34.3	251	4.07	4.24	1.22	41.8	45	20	162	2	<LOD	2	2	2	0	0
6/13/12 12:00 AM	1	1-1047	1	3	1	2	2	2	2	39	15.3592	92	13	TRUE	FALSE	FALSE	TRUE	5.79	34	155	3.5	1.73	0.5	42.1	39	18	112	2	<LOD	2	2	2	0	0
6/13/12 12:00 AM	1	1-1048	1	6	1	2	2	2	2	38.5	17.5955	118	24.5	TRUE	FALSE	FALSE	TRUE	8.68	31.6	140	7.65	0.51	0.51	43	38	14	97	2	<LOD	2	2	2	0	0
6/13/12 12:00 AM	1	1-1049	2	5	2	2	2	2	2	39	11.519	116	15.5	TRUE	FALSE	FALSE	FALSE	13.96	35.2	263	11.48	1.81	0.65	44.3	30	13	80	2	<LOD	2	2	2	0	0
6/13/12 12:00 AM	1	1-1050	1	6	2	2	2	2	2	39	13.5417	120	19.5	TRUE	FALSE	FALSE	FALSE	9.4	36.5	324	6	2.5	0.9	45.3	34	12	92	2	<LOD	2	2	2	0	0
6/13/12 12:00 AM	1	1-1051	2	4	2	2	2	2	2	38.8	14.8794	97	14	TRUE	FALSE	FALSE	FALSE	5.43	33.8	203	3.23	1.64	0.5	44.9	32	12	175	2	<LOD	2	2	2	0	0
6/14/12 12:00 AM	1	1-1052	1	2	2	2	2	2	2	39	17.5771	86	13	FALSE	FALSE	FALSE	FALSE	9.53	34	262	3.46	4.6	1.28	40.5	42	20	61	2	<LOD	2	2	2	0	0
6/14/12 12:00 AM	1	1-1053	1	4	1	2	2	2	2	39	17.005	97	16	FALSE	FALSE	FALSE	FALSE	14.31	40	221	11.42	1.83	1.05	45.2	51	18	75	2	<LOD	2	2	2	0	0
6/14/12 12:00 AM	1	1-1054	2	5	3	2	2	2	2	38.9	15.8608	108	18.5	FALSE	FALSE	FALSE	FALSE	8.41	34.3	149	5.66	2.39	0.29	38.6	34	12	70	2	<LOD	2	2	2	0	0
6/14/12 12:00 AM	1	1-1055	2	14	1	1	2	2	2	39	17.3484	148	38	TRUE	FALSE	FALSE	TRUE	7.86	42.3	219	6.57	0.83	0.39	49	118	53	48	1	1		1	2	0	0
6/14/12 12:00 AM	1	1-1056	1	15	1	2	2	1	2	38.9	20.8117	155	50	TRUE	FALSE	TRUE	TRUE	4.42	39.4	169	3.23	0.72	0.47	44.3	28	12	97	1	1		1	1	1	1
6/14/12 12:00 AM	1	1-1057	2	10	2	1	2	2	1	39	18.0737	145	38	FALSE	FALSE	FALSE	TRUE	5.46	36.9	194	4.47	0.54	0.43	42.3	59	26	57	1	4		1	1	2	1
6/14/12 12:00 AM	1	1-1058	1	4	2	2	2	2	2	38.8	16.6205	95	15	TRUE	FALSE	FALSE	FALSE	11.42	35.5	296	7.81	2.52	1.05	42.4	44	15	139	2	<LOD	2	2	2	0	2
6/14/12 12:00 AM	1	1-1059	1	5	2	2	2	2	2	38.7	12.8544	115	17	TRUE	FALSE	FALSE	FALSE	8.6	33.6	211	6.1	1.8	0.6	45	37	12	171	2	<LOD	2	2	2	0	0
6/15/12 12:00 AM	1	1-1060	2	2	3	2	2	2	2	38.8	16.225	86	12	TRUE	FALSE	FALSE	FALSE	8.64	36.2	239	5.01	2.87	0.69	41.5	38	15	95	2	<LOD	2	2	2	0	0
6/15/12 12:00 AM	1	1-1061	2	7	3	1	1	2	1	39.5	18.0278	129	30	TRUE	FALSE	FALSE	TRUE	6.4	37.4	75	2.59	3.07	0.69	43	38	18	128	1	2		2	1	2	1
6/15/12 12:00 AM	1	1-1062	1	9	3	1	1	2	1	39	10.2041	140	20	TRUE	TRUE	FALSE	TRUE	3.04	41.6	48	1.34	1.55	0.14	40.3	279	135	915	1	1		2	1	2	1
6/15/12 12:00 AM	1	1-1063	1	4	3	2	1	2	1	38.8	18.7422	98	18	FALSE	FALSE	FALSE	FALSE	5.94	47.8	28	1.32	3.82	0.79	34.3	336	209	97	2	<LOD	2	2	2	0	1
6/18/12 12:00 AM	1	1-1064	2	6	2	2	2	2	2	39.5	16.5182	118	23	TRUE	FALSE	FALSE	FALSE	8.23	38.5	179	6.48	1.33	0.42	37.5	31	12	56	2	<LOD	2	2	2	0	0
6/18/12 12:00 AM	1	1-1065	1	14	3	2	2	2	2	38.8	22.6003	156	55	FALSE	FALSE	FALSE	FALSE	4.79	36.5	252	2.34	1.93	0.48	45.8	21	10	129	1	<LOD	1	2	2	0	0
6/18/12 12:00 AM	1	1-1066	1	3	2	2	2	2	2	39.9	19.4943	92	16.5	TRUE	FALSE	FALSE	FALSE	8.72	37.5	249	6.15	1.48	0.71	43.6	43	17	99	2	<LOD	2	2	2	0	0
6/18/12 12:00 AM	1	1-1067	2	10	2	2	2	2	2	39.1	9.51249	145	20	TRUE	FALSE	FALSE	TRUE	13.17	38.4	210	9.42	2.75	0.96	42.1	26	17	42	2	<LOD	2	2	2	0	0
6/18/12 12:00 AM	1	1-1068	1	3	2	2	2	2	2	39.3	17.343	93	15	FALSE	FALSE	FALSE	FALSE	12.5	39.7	416	6.28	4.95	1.08	39.7	34	9	44	2	<LOD	2	2	2	0	0
6/18/12 12:00 AM	1	1-1069	2	2	2	2	2	2	2	38.6	14.5159	83	10	FALSE	FALSE	FALSE	FALSE	8.27	36.1	233	4.33	3.39	0.54	40.7	44	13	112	2	<LOD	2	2	2	0	2
6/18/12 12:00 AM	1	1-1070	1	6	2	1	2	2	2	39.3	15.0819	118	21	FALSE	FALSE	FALSE	FALSE	10.54	34.1	350	8.66	1.15	0.73	41.2	37	10	114	2	<LOD	2	2	2	0	0
6/18/12 12:00 AM	1	1-1071	2	9	3	2	2	2	2	39.5	15.753	138	30	FALSE	FALSE	FALSE	FALSE	18.24	34.1	330	14.27	3.01	0.7	38.2	23	7	71	2	<LOD	3	2	2	0	2
6/18/12 12:00 AM	1	1-1072	1	4	3	1	2	2	2	38.8	17.005	97	16	FALSE	FALSE	FALSE	FALSE	12.3	33.7	475	8	3.3	0.9	44.9	41	24	580	2	<LOD	2	2	2	0	0
6/19/12 12:00 AM	1	1-1073	2	2	2	1	2	2	2	39.2	17.0068	84	12	FALSE	FALSE	FALSE	FALSE	10.84	34.3	166	5.99	3.97	0.86	43.9	48	16	221	2	<LOD	2	2	2	0	0
6/19/12 12:00 AM	1	1-1074	1	10	3	1	1	2	1	38.9	14.3821	142	29	FALSE	FALSE	FALSE	TRUE	5.94	39.7	49	1.17	3.67	0.6	41.3	101	36	403	1	<LOD	1	2	2	0	0
6/19/12 12:00 AM	1	1-1075	1	11	3	1	2	2	2	39	21.2084	152	49	TRUE	FALSE	FALSE	FALSE	2.9	38.8	146	1.8	0.9	0.2	40.4	71	65	77	1	1		1	2	0	0
6/19/12 12:00 AM	1	1-1076	1	15	3	1	1	2	1	39.5	18.7305	155	45	TRUE	FALSE	FALSE	TRUE	8.03	45.3	96	6.32	1.37	0.34	35.5	37	11	322	2	<LOD	2	2	2	0	2
6/19/12 12:00 AM	1	1-1077	1	4	2	2	2	2	2	39.6	18.7422	98	18	TRUE	FALSE	FALSE	FALSE	4.4	41.5	98	2	2	0.4	35.9	47	14	73	2	<LOD	2	2	2	0	2
6/20/12 12:00 AM	1	1-1078	2	3	1	2	2	2	2	39	24.1517	91	20	FALSE	FALSE	FALSE	FALSE	15.92	40	327	9.24	4.56	2.08	48.4	44	33	55	2	<LOD	2	2	2	0	0
6/20/12 12:00 AM	1	1-1079	1	1	2	1	2	2	2	39.5	14.8438	80	9.5	FALSE	FALSE	FALSE	FALSE	9.66	36.4	368	1.1	7.79	0.75	42.5	74	26	134	2	<LOD	2	2	2	0	0
6/20/12 12:00 AM	1	1-1080	1	14	2	2	2	2	1	38.8	17.2584	156	42	FALSE	FALSE	FALSE	FALSE	4.67	46.6	164	3.11	1.15	0.36	46.8	30	18	99	1	4		1	2	0	0
6/20/12 12:00 AM	1	1-1081	1	3	2	2	2	2	2	38.8	16.276	96	15	FALSE	FALSE	FALSE	FALSE	11.56	34.6	316	7.19	3.09	1.2	40.9	46	19	107	1	4		2	2	0	0
6/20/12 12:00 AM	1	1-1082	1	4	2	2	2	2	2	39.2	25.7064	95	23.2	FALSE	FALSE	FALSE	FALSE	7.09	39.5	164	2.07	4.65	0.33	43.5	64	27	329	2	<LOD	2	2	2	0	0
6/20/12 12:00 AM	1	1-1083	2	4	2	1	1	2	2	38.7	22.3399	88	17.3	FALSE	FALSE	FALSE	FALSE	11.48	34.6	279	6.51	3.97	0.98	43.1	35	10	106	2	<LOD	2	2	2	0	0
6/20/12 12:00 AM	1	1-1084	2	6	3	2	1	2	2	39.5	17.2364	118	24	FALSE	FALSE	FALSE	FALSE	6.53	40.3	195	4.33	1.61	0.57	43.3	40	12	67	2	<LOD	2	2	2	0	0
6/21/12 12:00 AM	1	1-1085	2	2	2	2	2	2	2	39.3	13.8872	91	11.5	FALSE	FALSE	FALSE	FALSE	6.76	36.5	208	3.94	2.15	0.65	39	42	15	158	2	<LOD	2	2	2	0	0
6/21/12 12:00 AM	1	1-1086	2	3	3	2	2	2	2	39.5	12.9962	92	11	FALSE	FALSE	FALSE	FALSE	10.28	32.9	361	4.96	4.56	0.52	43.9	41	12	94	2	<LOD	2	2	2	0	0
6/21/12 12:00 AM	1	1-1087	1	6	2	2	2	2	2	38.8	14.3637	118	20	FALSE	FALSE	FALSE	FALSE	3.73	33.8	230	1.04	2.38	0.27	39.3	40	15	396	2	<LOD	2	2	2	0	0
6/22/12 12:00 AM	1	1-1088	2	7	2	2	1	2	2	39.4	17.5323	117	24	TRUE	FALSE	FALSE	TRUE	4.39	38.9	170	3.18	1	0.18	43.4	66	19	86	1	1		1	2	0	0
6/22/12 12:00 AM	1	1-1089	1	3	2	2	2	2	2	38.9	16.7872	88	13	TRUE	FALSE	FALSE	FALSE	6.57	36.5	255	3.03	2.85	0.54	42.5	40	11	103	2	<LOD	2	2	2	0	0
6/25/12 12:00 AM	1	1-1090	2	8	2	2	2	2	2	38.9	12.6263	132	22	FALSE	FALSE	FALSE	FALSE	16.05	41.9	332	10.71	4.31	0.81	48.3	52	22	161	2	<LOD	2	2	2	0	0
6/25/12 12:00 AM	1	1-1091	2	9	1	2	2	2	2	39	23.9757	137	45	FALSE	FALSE	FALSE	FALSE	6.07	36.5	156	4.77	0.72	0.57	44.5	42	18	144	1	1		1	1	1	1
6/25/12 12:00 AM	1	1-1092	1	14	3	2	2	2	1	38.8	20.9572	162	55	FALSE	FALSE	FALSE	FALSE	3.84	44.7	88	1.99	1.64	0.2	46.8	49	22	87	1	2		1	1	2	1
6/25/12 12:00 AM	1	1-1093	1	14	3	2	2	2	1	39.5	18.7652	146	40	FALSE	FALSE	FALSE	FALSE	2.17	43.1	135	1.24	0.76	0.17	42.7	51	19	187	1	4		1	2	0	0
6/25/12 12:00 AM	1	1-1094	1	11	1	2	2	2	2	39.5	22.907	144	47.5	FALSE	FALSE	FALSE	FALSE	8.04	42.7	331	4.59	2.21	1	44.7	31	31	88	2	<LOD	2	2	2	0	0
6/27/12 12:00 AM	1	1-1096	1	12	2	1	2	2	2	38.5	21.1109	146	45	FALSE	FALSE	FALSE	FALSE	4.21	39.8	151	3.12	0.73	0.36	43.7	86	60	145	1	2		2	2	0	0
6/27/12 12:00 AM	1	1-1097	2	5	2	1	2	2	2	39	22.3146	114	29	FALSE	FALSE	FALSE	FALSE	2.81	36.4	235	1.53	1.02	0.25	47	144	73	2676	1	2		2	2	0	0
6/27/12 12:00 AM	1	1-1098	2	5	3	2	2	2	2	38.9	10.1809	113	13	FALSE	FALSE	FALSE	FALSE	6.18	39.7	192	2.94	2.73	0.4	41.8	52	28	100	2	<LOD	2	2	2	0	2
6/27/12 12:00 AM	1	1-1099	1	10	2	2	2	2	1	39	22.3543	145	47	FALSE	FALSE	FALSE	FALSE	5.76	39.4	156	4.47	0.75	0.53	41	188	127	100	1	4		1	1	2	1
6/27/12 12:00 AM	1	1-1100	1	1	2	2	2	2	2	38.7	14.5159	83	10	TRUE	FALSE	FALSE	FALSE	20.69	32.4	190	11.99	6.37	2.28	43	42	13	90	2	<LOD	2	2	2	0	0
6/27/12 12:00 AM	1	1-1101	1	8	3	2	1	2	2	38.9	12.8091	134	23	TRUE	FALSE	FALSE	FALSE	4.5	39.4	183	2.8	1.13	0.29	42.1	46	13	103	2	<LOD	2	2	2	0	0
6/28/12 12:00 AM	1	1-1102	2	3	2	2	1	2	2	39.4	12.4055	92	10.5	TRUE	FALSE	FALSE	TRUE	6.64	38.8	195	3.49	2.67	0.48	44.8	57	21	173	2	<LOD	2	2	2	0	0
6/28/12 12:00 AM	1	1-1103	2	6	2	2	2	2	2	38.7	16.0713	117	22	TRUE	FALSE	FALSE	FALSE	4.49	37.2	253	2.49	1.37	0.47	42.3	33	13	39	2	<LOD	2	2	2	0	0
6/28/12 12:00 AM	1	1-1104	2	2	2	1	2	2	2	38.8	15.5489	86	11.5	TRUE	FALSE	FALSE	TRUE	8.18	38.4	220	3.62	4.04	0.52	44.2	46	13	105	2	<LOD	2	2	2	0	0
6/28/12 12:00 AM	1	1-1105	2	3	1	1	1	2	2	39.5	16.0494	90	13	TRUE	FALSE	FALSE	FALSE	5.92	36	179	3.2	2.27	0.44	46.9	44	12	107	2	<LOD	2	2	2	0	0
6/28/12 12:00 AM	1	1-1106	2	1	2	1	1	2	2	38.7	14.4795	81	9.5	TRUE	FALSE	FALSE	FALSE	7.57	35.5	230	3.11	3.4	1.05	43.9	72	26	901	1	2		2	2	0	0
6/28/12 12:00 AM	1	1-1107	1	3	2	2	2	2	2	38.9	16.1868	93	14	TRUE	FALSE	FALSE	FALSE	7	36.5	184	3.91	2.27	0.62	43.8	38	13	134	2	<LOD	2	2	2	0	2
6/28/12 12:00 AM	1	1-1108	2	7	2	2	2	2	2	38.8	14.6848	121	21.5	FALSE	FALSE	FALSE	FALSE	7.4	36.9	170	1.6	5.1	0.7	46.1	44	16	113	2	<LOD	2	2	2	0	0
6/29/12 12:00 AM	1	1-1109	1	9	2	2	2	2	2	38.8	14.5978	136	27	FALSE	FALSE	FALSE	FALSE	3.64	40.2	136	1.06	2.15	0.33	43.6	40	14	109	2	<LOD	2	2	2	0	0
6/29/12 12:00 AM	1	1-1110	1	4	1	2	2	2	2	39.1	26.0308	98	25	FALSE	FALSE	FALSE	FALSE	12.72	39.6	250	8.82	2.75	1.1	45.9	39	31	60	2	<LOD	2	2	2	0	0
2012-02-07	1	1-1111	2	12	3	2	2	2	1	38.9	9.13075	148	20	TRUE	FALSE	FALSE	FALSE	2.09	39.4	104	1.23	0.63	0.22	41.6	86	45	107	1	1		1	1	1	1
2012-02-07	1	1-1112	1	4	2	1	2	2	1	39.3	17.3611	96	16	TRUE	FALSE	FALSE	FALSE	4.39	39.9	204	1.15	2.97	0.26	44.7	59	18	133	2	<LOD	2	2	2	0	0
2012-02-07	1	1-1113	2	4	1	1	2	2	2	38.8	18.4462	96	17	FALSE	FALSE	FALSE	FALSE	8.68	37	357	5.4	2.54	0.73	45.6	38	16	40	2	<LOD	2	2	2	0	0
2012-02-07	1	1-1114	1	6	2	2	2	2	2	38.9	21.5278	120	31	TRUE	FALSE	FALSE	FALSE	23.9	34.3	381	20.75	1.84	0.75	42.3	28	23	28	2	<LOD	2	2	2	0	0
2012-02-07	1	1-1115	1	5	2	2	1	2	2	39	14.8633	116	20	FALSE	FALSE	FALSE	FALSE	12.82	35.9	308	8.19	3.62	0.88	45	36	11	80	2	<LOD	2	2	2	0	0
2012-02-07	1	1-1116	2	5	2	2	2	2	2	38.7	21.5517	116	29	FALSE	FALSE	FALSE	FALSE	4.41	36.4	234	1.58	2.35	0.46	42.4	44	15	98	2	<LOD	2	2	2	0	0
2012-03-07	1	1-1117	1	12	3	2	2	2	1	39.2	23.2834	148	51	FALSE	FALSE	TRUE	FALSE	3.63	36.8	199	1.44	1.67	0.39	42.7	46	27	125	1	<LOD	1	1	2	0	0
2012-04-07	1	1-1118	2	9	1	1	2	2	2	39.3	13.6526	138	26	FALSE	FALSE	FALSE	TRUE	5.82	35.8	245	2.91	2.24	0.67	47.2	50	18	58	2	<LOD	2	2	2	0	2
2012-04-07	1	1-1119	2	1	2	1	2	2	2	38.8	10.8869	83	7.5	TRUE	FALSE	FALSE	FALSE	10.46	33.1	196	4.86	4.26	1.29	46.6	55	19	84	2	<LOD	2	2	2	0	0
2012-04-07	1	1-1120	2	3	2	2	2	1	2	38.9	17.7221	92	15	TRUE	FALSE	FALSE	FALSE	14.85	34.2	138	11.24	2.1	1.41	42.9	34	12	84	2	<LOD	2	2	2	0	0
2012-04-07	1	1-1121	2	10	2	1	2	2	2	39	12.7146	143	26	TRUE	FALSE	FALSE	FALSE	3.54	37.6	104	2.43	0.81	0.29	44.6	76	34	154	1	<LOD	1	1	1	2	1
2012-04-07	1	1-1122	1	5	3	1	2	2	2	39.2	13.2325	115	17.5	FALSE	FALSE	FALSE	FALSE	4.78	36.5	168	2.36	1.72	0.35	45.7	42	16	78	2	<LOD	2	2	2	0	0
2012-05-07	1	1-1123	2	1	2	2	2	2	1	39	15.625	80	10	TRUE	FALSE	FALSE	FALSE	13.09	35.5	291	5.71	6.27	1.09	42.6	46	18	129	2	<LOD	2	2	2	0	0
2012-05-07	1	1-1124	2	3	2	1	2	2	2	39.5	16.5406	92	14	TRUE	FALSE	FALSE	FALSE	10.6	35.4	232	6.44	3.23	0.92	41.1	42	13	82	2	<LOD	2	2	2	0	0
2012-05-07	1	1-1125	1	7	2	2	2	2	1	39	16.1247	122	24	TRUE	FALSE	FALSE	FALSE	6.31	35.9	155	2.92	2.37	1	42.1	36	10	174	2	<LOD	2	2	2	0	2
2012-06-07	1	1-1126	1	6	2	2	2	2	2	38.5	15.1229	115	20	FALSE	FALSE	FALSE	FALSE	5.68	37.9	257	4.1	1.06	0.51	45.1	45	14	126	2	<LOD	2	2	2	0	0
2012-06-07	1	1-1127	2	3	1	2	2	2	2	38.6	16.1868	93	14	FALSE	FALSE	FALSE	FALSE	8.62	37	203	6.59	1.25	0.59	45.3	61	29	98	2	<LOD	2	2	2	0	0
2012-06-07	1	1-1128	2	4	2	2	2	2	2	37.8	14.4175	102	15	FALSE	FALSE	FALSE	FALSE	4.24	36	178	1.78	2.08	0.37	35.2	41	13	102	2	<LOD	2	2	2	0	0
2012-06-07	1	1-1129	1	8	1	1	2	2	2	38	15.747	126	25	FALSE	FALSE	FALSE	FALSE	10.31	38.5	236	8.2	1.23	0.83	43.5	36	18	91	2	<LOD	2	2	2	0	0
2012-06-07	1	1-1130	2	3	1	2	2	1	2	39.3	16.8186	96	15.5	TRUE	FALSE	FALSE	FALSE	9.87	36.5	345	7.29	1.85	0.71	44.3	42	17	55	2	<LOD	2	2	2	0	0
2012-06-07	1	1-1131	1	6	2	1	2	2	1	38.8	10.5925	119	15	TRUE	FALSE	FALSE	FALSE	3.92	36.7	137	1.67	1.97	0.23	40.5	53	24	396	2	<LOD	2	2	2	0	0
2012-06-07	1	1-1132	2	3	2	2	2	2	2	39.3	23.1241	93	20	TRUE	FALSE	FALSE	FALSE	5.1	37.7	261	1.5	3	0.6	41.1	46	22	230	2	<LOD	2	2	2	0	0
2012-06-07	1	1-1133	1	15	3	2	2	2	1	39.2	18.7305	155	45	TRUE	FALSE	FALSE	FALSE	4.5	41.4	158	3.2	0.9	0.5	46.2	31	17	100	1	4		2	2	0	0
2012-09-07	1	1-1134	2	3	2	1	2	2	2	38.9	18.4992	93	16	TRUE	FALSE	FALSE	FALSE	9	37.4	292	3.7	3.4	1.9	43.4	37	13	148	2	<LOD	2	2	2	0	0
2012-10-07	1	1-1135	1	10	3	2	2	2	2	39.3	20.0499	143	41	TRUE	FALSE	FALSE	FALSE	5.73	37.7	126	2.03	3.25	0.38	39.1	32	16	70	2	<LOD	2	2	2	0	1
2012-10-07	1	1-1136	1	2	3	2	2	2	2	39.5	17.4329	88	13.5	TRUE	FALSE	FALSE	FALSE	10.2	37.4	273	4.14	4.98	1.07	37.9	44	16	168	2	<LOD	2	2	2	0	0
2012-10-07	1	1-1137	1	13	2	2	2	2	2	39.5	21.4533	170	62	TRUE	FALSE	FALSE	FALSE	5.16	40.5	228	3.54	1.09	0.52	40.7	29	26	95	1	2		2	2	0	0
2012-10-07	1	1-1138	1	2	3	2	2	2	2	39.2	15.2249	85	11	TRUE	FALSE	FALSE	FALSE	5.54	32.7	166	2.17	2.96	0.4	42	47	35	288	2	<LOD	2	2	2	0	0
2012-10-07	1	1-1139	1	5	2	2	2	2	2	37.7	16.2894	108	19	FALSE	FALSE	FALSE	FALSE	4.67	35.2	187	2.48	1.72	0.47	43.3	47	20	91	2	<LOD	2	2	2	0	0
2012-10-07	1	1-1140	2	2	2	2	2	2	2	39.2	14.1723	84	10	FALSE	FALSE	FALSE	FALSE	17.85	35.4	589	14.93	1.96	0.93	42.3	37	12	38	2	<LOD	2	2	2	0	2
2012-11-07	1	1-1141	2	10	2	1	2	2	2	38.8	14.1777	138	27	TRUE	FALSE	TRUE	FALSE	6.27	38.6	150	4.72	1.17	0.36	38.6	55	34	120	1	4		1	1	2	1
2012-11-07	1	1-1142	1	3	2	1	2	2	2	39.3	17.6745	89	14	TRUE	FALSE	FALSE	FALSE	12.27	33.9	255	5.77	5.09	1.37	37.3	48	41	88	2	<LOD	2	2	2	0	0
2012-11-07	1	1-1143	1	5	3	2	1	2	2	38.7	15.1229	115	20	FALSE	FALSE	FALSE	FALSE	6.4	35.7	280	2.69	3.11	0.59	43	38	19	94	2	<LOD	2	2	2	0	0
2012-12-07	1	1-1144	2	13	1	1	2	2	2	38.6	16.8887	146	36	FALSE	FALSE	FALSE	FALSE	9.22	39.7	204	7.03	1.24	0.94	43.3	53	24	79	1	1		1	2	0	0
2012-12-07	1	1-1145	2	11	2	2	2	2	2	39	21.9479	135	40	TRUE	FALSE	FALSE	FALSE	9.19	35.5	226	5.66	2.98	0.55	44.9	43	37	150	2	<LOD	2	2	2	0	0
2012-12-07	1	1-1146	1	2	3	1	2	2	2	39.5	20.7612	85	15	FALSE	FALSE	FALSE	FALSE	12.4	35.6	135	7.39	4.23	0.72	42	50	20	118	2	<LOD	2	2	2	0	0
2012-12-07	1	1-1147	2	8	3	2	2	2	2	39.3	18.6557	133	33	FALSE	FALSE	FALSE	FALSE	2.7	36.7	133	0.86	1.69	0.13	37.4	81	62	95	1	1		1	2	0	0
7/13/12 12:00 AM	1	1-1148	2	4	2	2	2	2	2	38.9	15.5125	95	14	TRUE	FALSE	FALSE	FALSE	4.07	36.3	146	1	2.74	0.27	41.6	47	13	134	2	<LOD	2	2	2	0	0
7/13/12 12:00 AM	1	1-1149	1	13	2	2	2	2	2	39.5	22.0317	158	55	TRUE	FALSE	FALSE	FALSE	2.91	40.9	77	1.83	0.83	0.23	43.7	38	13	111	1	4		1	1	2	1
7/16/12 12:00 AM	1	1-1150	2	10	3	2	2	2	2	39.4	17.8571	140	35	FALSE	FALSE	FALSE	FALSE	3.46	41.8	130	2.39	0.78	0.27	42.3	62	25	65	1	4		2	1	2	1
7/16/12 12:00 AM	1	1-1151	1	10	2	2	2	2	2	39.3	10.869	139	21	FALSE	FALSE	FALSE	FALSE	17.01	37.6	254	10.27	5.07	1.53	41.7	34.7	69.2	61	2	<LOD	2	2	2	0	0
7/16/12 12:00 AM	1	1-1152	2	13	3	2	2	2	2	39.2	17.5981	145	37	FALSE	FALSE	FALSE	FALSE	6.95	40.5	187	4.71	1.5	0.63	41.5	29	19	136	2	<LOD	2	2	2	0	0
7/17/12 12:00 AM	1	1-1153	2	5	2	2	2	2	2	39.5	19.2367	114	25	FALSE	FALSE	FALSE	FALSE	3.68	36.6	210	2.32	0.98	0.32	41	27	10	65	1	2		1	2	0	0
7/17/12 12:00 AM	1	1-1154	2	2	3	2	2	2	2	39.5	18.2899	81	12	FALSE	FALSE	FALSE	FALSE	12.91	33.6	172	7.07	4.24	1.56	43.1	39	15	180	2	<LOD	2	2	2	0	0
7/17/12 12:00 AM	1	1-1155	1	2	3	2	2	2	2	39	20.3125	80	13	FALSE	FALSE	FALSE	FALSE	6.31	29.4	131	2.5	3.29	0.49	41.7	39	27	113	2	<LOD	2	2	2	0	0
7/17/12 12:00 AM	1	1-1156	1	6	2	2	2	2	2	39.5	22.9819	118	32	FALSE	FALSE	FALSE	FALSE	4.67	35.3	135	3.29	1.05	0.33	42.5	52	26	105	1	1		1	1	2	1
7/17/12 12:00 AM	1	1-1157	1	6	3	2	2	2	2	38.9	12.4187	117	17	FALSE	FALSE	FALSE	FALSE	5.41	35.1	217	2.75	2.23	0.39	44.5	42	15	152	2	<LOD	2	2	2	0	0
7/18/12 12:00 AM	1	1-1158	2	3	2	2	2	2	2	39.5	19.7531	90	16	FALSE	FALSE	FALSE	FALSE	12.34	38.7	217	6.85	4.53	0.94	44.5	23	5	88	2	<LOD	2	2	2	0	0
7/18/12 12:00 AM	1	1-1159	2	14	2	2	2	2	2	39.5	16.0256	156	39	FALSE	FALSE	FALSE	FALSE	4.17	38	185	2.31	1.25	0.51	43.3	45	37	53	1	2		2	2	0	0
7/18/12 12:00 AM	1	1-1160	1	1	2	2	2	2	2	38.8	16.4366	78	10	FALSE	FALSE	FALSE	FALSE	7.6	33.5	298	2.8	3.63	0.95	36.7	33	17	60	2	<LOD	2	2	2	0	0
7/19/12 12:00 AM	1	1-1161	2	4	3	1	2	2	2	39.1	18.9887	96	17.5	TRUE	FALSE	FALSE	FALSE	7.8	37	170	3.53	3.51	0.73	47.2	54	20	113	2	<LOD	2	2	2	0	0
7/19/12 12:00 AM	1	1-1162	2	2	2	2	2	2	2	39.5	21.4533	85	15.5	TRUE	FALSE	FALSE	FALSE	7.77	34.3	208	2.85	3.98	0.67	44.2	34	22	533	2	<LOD	2	2	2	0	0
7/19/12 12:00 AM	1	1-1163	2	4	2	2	2	2	2	39	18.4462	96	17	TRUE	FALSE	FALSE	FALSE	18.22	38.5	357	13.99	2.9	1.28	45.3	33	14	594	2	<LOD	2	2	2	0	0
7/20/12 12:00 AM	1	1-1164	1	4	1	2	2	2	2	38.9	26.5928	95	24	FALSE	FALSE	FALSE	FALSE	6.74	35.5	254	4.98	1.29	0.46	47.8	44	20	111	2	<LOD	2	2	2	0	0
7/23/12 12:00 AM	1	1-1165	1	10	1	2	2	2	2	39	15.3061	140	30	FALSE	FALSE	FALSE	FALSE	7.42	32.7	117	5.94	0.9	0.56	45.3	28	13	98	2	<LOD	2	2	2	0	0
7/23/12 12:00 AM	1	1-1166	2	5	2	2	2	2	2	39	19.6597	115	26	FALSE	FALSE	FALSE	FALSE	11.79	40.8	283	9.15	2.11	0.5	46.7	35	20	91	2	<LOD	2	2	2	0	0
7/24/12 12:00 AM	1	1-1167	2	4	2	2	1	2	1	39.2	18.1406	105	20	TRUE	FALSE	FALSE	FALSE	6.34	44.2	123	2.26	3.71	0.34	43	83	24	61	1	4		2	1	2	1
7/25/12 12:00 AM	1	1-1168	1	13	1	2	2	2	2	38.8	28.1625	161	73	TRUE	FALSE	FALSE	TRUE	5.91	39.8	300	4.28	0.75	0.86	48.6	66	47	71	1	1		1	1	1	3
7/25/12 12:00 AM	1	1-1169	2	7	2	1	1	2	2	39	20.8086	116	28	TRUE	FALSE	FALSE	FALSE	6.47	39.6	210	4.66	1.01	0.78	45.6	54	26	115	1	4		1	1	2	1
7/26/12 12:00 AM	1	1-1170	1	5	2	1	2	2	2	38.9	17.3554	110	21	FALSE	FALSE	FALSE	FALSE	4.53	34.9	185	2.63	1.53	0.37	42.8	32	14	50	2	<LOD	2	2	2	0	0
7/27/12 12:00 AM	1	1-1171	2	4	2	2	2	2	2	38.8	14.7125	94	13	TRUE	FALSE	TRUE	FALSE	10.47	35.9	466	7.58	2.19	0.6	41.6	49	17	67	2	<LOD	2	2	2	0	0
7/30/12 12:00 AM	1	1-1172	2	3	2	2	2	2	2	38.9	13.5802	90	11	FALSE	FALSE	FALSE	FALSE	9.04	31.1	331	5.86	2.63	0.54	41.1	50	9	124	2	<LOD	2	2	2	0	0
7/30/12 12:00 AM	1	1-1173	1	14	3	2	2	2	1	39	12.3884	153	29	FALSE	FALSE	FALSE	FALSE	2.84	43.9	105	1.39	0.89	0.38	43.3	64	24	75	1	1		2	1	2	1
7/30/12 12:00 AM	1	1-1174	1	12	3	2	2	2	2	39.5	23.4566	146	50	FALSE	FALSE	FALSE	FALSE	6.3	46.4	146	3.26	2.41	0.55	48.7	41	19	264	2	<LOD	2	2	2	0	2
7/30/12 12:00 AM	1	1-1175	2	5	3	2	2	2	1	39.5	14.6092	111	18	FALSE	FALSE	FALSE	FALSE	4.68	40	152	2.03	2.12	0.52	43	52	14	97	1	4		1	2	0	0
7/30/12 12:00 AM	1	1-1176	2	9	3	2	2	2	1	38.8	24.6914	135	45	FALSE	FALSE	FALSE	FALSE	2.54	40	73	1.01	1.27	0.25	41.6	204	167	112	1	4		2	1	2	1
7/30/12 12:00 AM	1	1-1177	1	12	3	2	2	2	2	39.2	14.4138	149	32	FALSE	FALSE	FALSE	FALSE	11.76	37.9	258	8.63	2.16	0.95	43.8	34	9	102	2	<LOD	2	2	2	0	0
7/31/12 12:00 AM	1	1-1178	2	13	2	2	2	2	2	39.3	18.3783	134	33	FALSE	FALSE	FALSE	FALSE	6.26	37.5	237	4.76	1	0.4	47	45	20	107	1	2		2	2	0	0
7/31/12 12:00 AM	1	1-1179	2	2	2	2	2	2	2	38.8	14.1723	84	10	FALSE	FALSE	FALSE	FALSE	13.54	36.1	231	6.12	6.29	1.07	43.5	32	10	35	2	<LOD	2	2	2	0	0
7/31/12 12:00 AM	1	1-1180	2	4	3	2	2	2	2	39.1	13.5808	94	12	FALSE	FALSE	FALSE	FALSE	2.87	38	209	1.23	1.17	0.46	43.6	44	12	61	1	2		2	2	0	0
7/31/12 12:00 AM	1	1-1181	1	11	3	2	2	2	2	39.4	13.67	153	32	FALSE	FALSE	FALSE	FALSE	5.4	42.2	176	3.54	1.27	0.58	50.1	49	33	100	1	1		1	1	2	1
2012-01-08	1	1-1182	1	12	2	2	2	2	2	39.5	13.7778	150	31	TRUE	FALSE	FALSE	FALSE	3.55	42.5	156	2.24	0.84	0.42	40.7	54	37	115	1	4		2	2	0	0
2012-01-08	1	1-1183	2	5	2	2	2	2	2	39	10.2079	115	13.5	FALSE	FALSE	FALSE	FALSE	3.16	38.4	265	1.42	1.41	0.33	42.4	165	71	162	1	1		1	2	0	0
2012-01-08	1	1-1184	2	3	2	2	2	2	2	38.9	14.491	91	12	FALSE	FALSE	FALSE	FALSE	13.45	35.5	256	8.82	3.28	1.31	38.5	48	13	67	2	<LOD	2	2	2	0	0
2012-01-08	1	1-1185	2	1	2	1	2	2	2	39	12.5	80	8	TRUE	FALSE	FALSE	FALSE	9.37	35.3	155	3.24	5.53	0.58	41.5	54	12	127	2	<LOD	2	2	2	0	0
2012-01-08	1	1-1186	2	4	2	2	2	2	2	38.8	18.1077	94	16	FALSE	FALSE	FALSE	FALSE	12.5	36.5	202	9.67	2.21	0.62	39.4	40	15	63	2	<LOD	2	2	2	0	0
2012-01-08	1	1-1187	2	4	3	1	2	2	2	39.2	20.0738	96	18.5	FALSE	FALSE	FALSE	FALSE	3.43	36.5	217	2.31	0.86	0.24	42.6	39	14	114	2	<LOD	2	2	2	0	0
2012-02-08	1	1-1188	2	12	2	2	2	2	2	38.7	13.2396	148	29	FALSE	FALSE	FALSE	TRUE	4.69	36.1	106	3.81	0.57	0.31	41.5	82	47	90	1	1		1	2	0	0
2012-03-08	1	1-1189	1	5	3	2	2	2	2	39.4	13.3135	113	17	FALSE	FALSE	FALSE	TRUE	7.02	38.2	222	4.97	1.62	0.42	40.1	57	18	337	1	4		2	2	0	0
2012-03-08	1	1-1190	1	5	1	2	2	2	2	38.9	18.3355	112	23	FALSE	FALSE	FALSE	TRUE	11.94	37.9	308	10.3	0.86	0.74	45.9	35	15	120	1	1		1	2	0	0
2012-03-08	1	1-1191	1	7	2	2	2	2	2	39.2	16.3923	121	24	FALSE	FALSE	FALSE	TRUE	5.68	40.6	212	3.76	1.51	0.4	42.6	51	24	108	1	1		2	1	2	1
2012-03-08	1	1-1192	1	8	2	2	2	2	2	38.9	13.366	134	24	FALSE	FALSE	FALSE	FALSE	12.1	37.8	315	8.9	2.49	0.62	45.6	23	12	69	2	<LOD	2	2	2	0	0
2012-07-08	1	1-1193	1	8	1	1	1	2	2	38.8	14.1331	133	25	TRUE	FALSE	FALSE	TRUE	5.03	37	203	3.39	0.92	0.71	43.3	45	15	145	1	1		1	2	0	0
2012-07-08	1	1-1194	1	3	2	2	2	2	2	39.2	27.7744	91	23	FALSE	FALSE	FALSE	TRUE	12.33	36.8	250	9.11	2.57	0.61	42.5	35	18	68	2	<LOD	2	2	2	0	0
2012-07-08	1	1-1195	2	10	2	2	2	2	2	38.5	19.6167	141	39	FALSE	FALSE	FALSE	TRUE	5.64	40.2	221	3.42	1.61	0.59	43.9	37	18	77	1	1		1	2	0	0
2012-07-08	1	1-1196	1	6	2	2	2	2	2	40	20.8273	118	29	TRUE	FALSE	TRUE	TRUE	13.74	38.7	195	11.38	1.4	0.91	39	43	17	47	1	1		1	2	0	0
2012-07-08	1	1-1197	2	15	3	2	2	1	1	39.5	20.9566	156	51	TRUE	FALSE	FALSE	TRUE	3.19	31.9	145	2.11	0.84	0.24	39.3	26	10	98	1	4		1	2	0	0
2012-08-08	1	1-1198	2	2	2	1	2	2	2	39.3	13.5208	86	10	TRUE	FALSE	FALSE	FALSE	9.4	35.2	223	5.14	3.56	0.66	45.3	47	15	125	2	<LOD	2	2	2	0	0
2012-09-08	1	1-1199	1	9	2	2	2	2	2	39.2	22.6843	115	30	TRUE	FALSE	FALSE	TRUE	13.22	34.6	315	7.91	3.15	1.08	43.7	37	11	71	2	<LOD	2	2	2	0	0
2012-10-08	1	1-1200	1	9	2	1	1	2	1	37.5	21.2204	139	41	TRUE	FALSE	FALSE	FALSE	8	51.8	98	4.2	2	1.8	44.5	370	257	120	1	2		2	1	2	1
2012-10-08	1	1-1201	2	6	3	2	2	2	1	39.5	12.4187	117	17	FALSE	FALSE	FALSE	FALSE	3.16	38	135	1.23	1.7	0.21	44.6	76	37	230	2	<LOD	2	2	2	0	2
8/13/12 12:00 AM	1	1-1202	1	2	2	2	1	2	2	38.8	22.7244	89	18	TRUE	FALSE	FALSE	FALSE	5.83	37.5	73	1.35	4.23	0.19	40.7	114	98	154	1	1		1	2	0	0
8/13/12 12:00 AM	1	1-1203	2	4	3	1	1	1	2	39.2	16.4101	94	14.5	TRUE	FALSE	FALSE	FALSE	8.81	40.1	173	6.14	2.13	0.5	46.9	53	17	130	2	<LOD	2	2	2	0	0
8/13/12 12:00 AM	1	1-1204	1	5	3	2	2	2	2	38.7	15.1229	115	20	TRUE	FALSE	FALSE	FALSE	5.64	39.4	186	1.54	3.46	0.42	43.6	59	22	230	2	<LOD	2	2	2	0	0
8/13/12 12:00 AM	1	1-1205	2	8	3	1	2	1	2	39.5	16.2197	136	30	TRUE	FALSE	FALSE	FALSE	3.86	39.9	128	2.19	0.93	0.74	48.1	36	24	68	1	2		1	1	2	1
8/13/12 12:00 AM	1	1-1206	2	6	2	2	2	2	2	38.9	15.1229	115	20	FALSE	FALSE	FALSE	FALSE	15.18	36.3	405	7.89	5.78	1.32	41.2	26	7	38	2	<LOD	2	2	2	0	0
8/13/12 12:00 AM	1	1-1207	1	3	3	2	2	2	2	39.1	18.9036	92	16	TRUE	FALSE	FALSE	FALSE	3.98	36	271	1.81	1.73	0.39	41.2	47	24	287	2	<LOD	2	2	2	0	0
8/14/12 12:00 AM	1	1-1208	1	10	2	2	2	2	2	39.2	13.2653	140	26	FALSE	FALSE	FALSE	FALSE	11.08	36.9	285	8.62	1.59	0.82	43.5	23	11	80	2	<LOD	2	2	2	0	0
8/15/12 12:00 AM	1	1-1209	1	6	3	2	2	2	1	38	20.8086	116	28	TRUE	FALSE	FALSE	FALSE	4.43	39.5	129	2.25	1.82	0.34	39	56	36	106	1	4		1	1	2	1
8/15/12 12:00 AM	1	1-1210	2	14	1	2	1	2	2	39	16.2331	153	38	FALSE	FALSE	FALSE	FALSE	4.5	36.4	241	3.4	0.74	0.35	40.7	32	21	113	1	1		2	2	0	0
8/15/12 12:00 AM	1	1-1211	2	6	2	1	2	2	2	39.5	18.6728	118	26	TRUE	FALSE	FALSE	FALSE	6.94	37.3	216	3.95	2.37	0.55	38.6	46	41	110	1	3		1	2	0	0
8/16/12 12:00 AM	1	1-1212	1	7	3	1	2	2	2	39.3	14.308	124	22	FALSE	FALSE	FALSE	FALSE	2.12	39.2	157	1.3	0.72	0.09	38.2	136	87	101	1	1		1	1	2	1
8/16/12 12:00 AM	1	1-1213	2	4	1	2	2	2	2	38.8	14.7125	94	13	TRUE	FALSE	FALSE	FALSE	6.97	36.1	240	5.08	1.33	0.54	42.5	49	14	118	2	<LOD	2	2	2	0	0
8/17/12 12:00 AM	1	1-1214	1	11	2	2	2	2	2	37.6	16	150	36	FALSE	FALSE	FALSE	FALSE	3.16	37.3	201	1.53	1.37	0.25	43.2	35	16	105	1	1		1	2	0	0
8/17/12 12:00 AM	1	1-1215	1	2	1	2	2	2	2	39	15.5896	84	11	FALSE	FALSE	FALSE	FALSE	15.1	35.1	308	11.14	2.78	1.13	45.1	44	19	119	2	<LOD	2	2	2	0	0
8/17/12 12:00 AM	1	1-1216	1	14	2	2	2	2	2	39.4	13.7357	155	33	FALSE	FALSE	FALSE	FALSE	8.08	30.6	352	6.16	1.22	0.69	41.7	42	22	61	1	4		1	2	0	0
8/17/12 12:00 AM	1	1-1217	1	3	3	2	2	2	2	39.3	19.7531	90	16	FALSE	FALSE	FALSE	FALSE	6.66	37.6	285	2.31	3.59	0.74	41.6	51	19	70	2	<LOD	2	2	2	0	2
8/17/12 12:00 AM	1	1-1218	1	8	1	2	2	2	1	38.8	12.62	135	23	FALSE	FALSE	FALSE	FALSE	9.76	39.6	217	5.69	3.17	0.85	43.8	54	19	433	2	<LOD	2	2	2	0	0
8/20/12 12:00 AM	1	1-1219	2	2	2	2	2	2	2	39	16.901	86	12.5	FALSE	FALSE	FALSE	FALSE	18.61	34.6	333	11.57	5.65	1.22	39.7	55	37	68	2	<LOD	2	2	2	0	0
8/20/12 12:00 AM	1	1-1220	1	3	3	2	2	2	2	38.9	18.0785	88	14	FALSE	FALSE	FALSE	FALSE	16.27	34.7	272	13.38	1.81	1.05	45.3	44	18	103	2	<LOD	2	2	2	0	0
8/20/12 12:00 AM	1	1-1221	1	9	3	1	2	2	1	37.6	15.753	138	30	TRUE	FALSE	FALSE	TRUE	2.32	38.1	114	0.68	1.46	0.18	41.9	51	15	145	1	1		2	2	0	0
8/20/12 12:00 AM	1	1-1222	2	13	3	2	2	2	2	38	19.91	152	46	TRUE	FALSE	FALSE	FALSE	2.12	39.3	104	1.43	0.66	0.02	44	68	31	149	1	<LOD	1	1	1	1	2
8/21/12 12:00 AM	1	1-1223	2	6	2	2	2	2	2	39.2	19.7239	117	27	TRUE	FALSE	FALSE	FALSE	7.53	40.4	236	4.07	2.76	0.66	44.2	60	47	83	2	<LOD	2	2	2	0	0
8/21/12 12:00 AM	1	1-1224	2	12	3	1	2	2	2	39.2	18.1312	154	43	TRUE	FALSE	FALSE	FALSE	2.78	43.3	98	1.64	0.83	0.31	41	73	25	392	1	2		1	1	2	1
8/21/12 12:00 AM	1	1-1225	1	2	2	2	2	2	2	38.8	17.9931	85	13	FALSE	FALSE	FALSE	FALSE	8.71	31.6	276	5.22	3	0.48	42.5	66	45	184	2	<LOD	2	2	2	0	0
8/21/12 12:00 AM	1	1-1226	1	5	3	2	2	2	2	38.9	13.3135	113	17	FALSE	FALSE	FALSE	FALSE	9.06	35.5	18	6.65	1.88	0.39	41.4	43	15	85	2	<LOD	2	2	2	0	0
8/21/12 12:00 AM	1	1-1227	1	3	2	1	2	2	2	38.7	16.9062	91	14	FALSE	FALSE	FALSE	FALSE	10.84	34	290	9.4	0.95	0.48	45.6	46	33	213	2	<LOD	2	2	2	0	0
8/21/12 12:00 AM	1	1-1228	1	7	2	1	2	2	1	39	21.416	126	34	FALSE	FALSE	FALSE	FALSE	10.77	37.1	272	7.65	2.52	0.59	44.6	50	20	146	2	<LOD	2	2	2	0	0
8/21/12 12:00 AM	1	1-1229	2	7	3	2	2	2	2	39	12.4	127	20	FALSE	FALSE	FALSE	FALSE	3.8	38.7	146	1.75	1.77	0.27	45.3	43	16	135	2	<LOD	2	2	2	0	0
8/22/12 12:00 AM	1	1-1230	2	7	2	2	2	2	2	39.3	17.3913	115	23	FALSE	FALSE	FALSE	FALSE	5.89	38.6	202	4.05	1.45	0.39	40.6	33	15	88	2	<LOD	2	2	2	0	0
8/22/12 12:00 AM	1	1-1231	1	12	3	2	2	1	1	39.2	20.8889	150	47	FALSE	FALSE	FALSE	TRUE	3.26	40	119	2.09	0.8	0.31	40.1	32	20	296	1	3		1	2	0	0
8/22/12 12:00 AM	1	1-1232	1	6	3	2	2	2	2	38.9	14.3637	118	20	TRUE	FALSE	FALSE	FALSE	5.23	37.1	232	2.08	2.77	0.37	37.1	34	18	468	2	<LOD	2	2	2	0	0
8/23/12 12:00 AM	1	1-1233	2	1	2	2	2	1	1	38.8	11.4062	80	7.3	FALSE	FALSE	TRUE	TRUE	9.71	36.9	75	1.65	7.09	0.83	35.1	64	19	40	2	<LOD	2	2	2	0	1
8/23/12 12:00 AM	1	1-1234	2	15	3	2	2	2	2	38.9	17.898	155	43	FALSE	FALSE	FALSE	FALSE	2.63	38.4	155	1.04	1.24	0.33	40.9	24	10	82	1	4		1	2	0	0
8/24/12 12:00 AM	1	1-1235	2	5	1	1	2	2	1	38.5	8.91795	116	12	FALSE	FALSE	TRUE	FALSE	6.6	37	217	4.64	0.88	1.04	40.6	45	19	67	1	1		2	2	0	0
8/24/12 12:00 AM	1	1-1236	2	7	2	2	2	2	2	38	17.7515	130	30	TRUE	FALSE	FALSE	FALSE	3.92	34.5	264	1.47	2.14	0.29	41.6	46	37	181	1	2		2	2	0	0
8/24/12 12:00 AM	1	1-1237	1	9	2	2	1	1	1	38.8	17.8571	140	35	TRUE	FALSE	FALSE	TRUE	4.73	35.6	167	3.1	1.27	0.35	41.2	55	32	102	1	1		1	1	2	1
8/24/12 12:00 AM	1	1-1238	1	4	2	2	2	2	1	38.9	10.2931	101	10.5	FALSE	FALSE	TRUE	TRUE	5.57	37.5	75	1.39	3.81	0.35	35.6	115	31	94	2	<LOD	2	2	2	0	0
8/24/12 12:00 AM	1	1-1239	1	4	2	2	2	2	2	37.7	16.78	105	18.5	TRUE	FALSE	FALSE	FALSE	8.68	36.3	223	5.21	2.79	0.65	39.3	24	9	133	2	<LOD	2	2	2	0	0
8/24/12 12:00 AM	1	1-1240	2	5	3	2	2	2	1	37.5	12.4008	115	16.4	TRUE	FALSE	TRUE	FALSE	3.09	34.5	115	1.4	1.41	0.23	37.7	51	22	279	1	4		1	2	0	0
8/27/12 12:00 AM	1	1-1241	1	5	3	2	2	2	2	39.5	11.7472	113	15	FALSE	FALSE	FALSE	FALSE	4.37	39.3	163	2.51	1.57	0.2	37.4	44	18	64	2	<LOD	2	2	2	0	0
8/27/12 12:00 AM	1	1-1242	2	8	3	2	2	2	2	40	11.52	125	18	FALSE	FALSE	FALSE	FALSE	7.25	37.6	355	2.36	3.91	0.33	40.7	32	14	156	2	<LOD	2	2	2	0	0
8/27/12 12:00 AM	1	1-1243	1	5	2	2	2	2	2	38.9	13.0809	114	17	FALSE	FALSE	FALSE	FALSE	6.95	37.4	226	2.9	3.45	0.57	41.9	40	18	136	2	<LOD	2	2	2	0	0
8/27/12 12:00 AM	1	1-1244	2	4	3	2	2	2	1	39	19.6555	93	17	FALSE	FALSE	FALSE	FALSE	3.34	28.6	191	0.84	2.2	0.2	41.9	36	17	100	1	<LOD	1	1	2	0	0
8/27/12 12:00 AM	1	1-1245	1	3	3	2	1	2	2	38.8	18.1138	91	15	FALSE	FALSE	FALSE	FALSE	18.19	36.7	352	13.47	3.7	0.99	44.1	29	13	90	2	<LOD	2	2	2	0	0
8/28/12 12:00 AM	1	1-1246	2	3	2	2	2	2	2	39.4	15.191	96	14	FALSE	FALSE	FALSE	FALSE	9.4	38.7	233	6.1	2.45	0.62	38.8	56	31	650	2	<LOD	2	2	2	0	0
8/28/12 12:00 AM	1	1-1247	2	3	3	1	2	2	2	38.9	15.1496	89	12	FALSE	FALSE	FALSE	FALSE	6.77	38.8	222	2.23	3.79	0.61	41.8	44	18	189	2	<LOD	2	2	2	0	0
8/28/12 12:00 AM	1	1-1248	1	1	3	2	2	2	2	39.3	14.0444	75	7.9	FALSE	FALSE	FALSE	FALSE	11	29.8	217	7.47	2.78	0.73	32.8	44	22	195	2	<LOD	2	2	2	0	0
8/29/12 12:00 AM	1	1-1249	2	3	3	1	2	2	2	39	18.1138	91	15	FALSE	FALSE	FALSE	FALSE	6.5	33.3	223	2.06	3.94	0.47	39.9	55	32	96	1	1		1	2	0	0
8/29/12 12:00 AM	1	1-1250	1	2	2	2	2	2	2	39.4	13.2118	87	10	FALSE	FALSE	FALSE	FALSE	18.84	32.3	487	12.9	4.2	1.34	37.6	36	14	64	2	<LOD	2	2	2	0	0
8/29/12 12:00 AM	1	1-1251	1	3	2	2	2	2	2	39.3	15.0306	93	13	FALSE	FALSE	FALSE	FALSE	7.64	35	212	5.24	1.1	1.22	38.8	33	16	105	2	<LOD	2	2	2	0	0
8/29/12 12:00 AM	1	1-1252	2	2	2	2	2	2	2	38.8	17.8465	82	12	FALSE	FALSE	FALSE	FALSE	8.09	39.1	362	3.43	3.96	0.66	41.8	43	26	88	2	<LOD	2	2	2	0	3
8/29/12 12:00 AM	1	1-1253	2	1	2	2	2	2	2	38.7	15.6147	78	9.5	FALSE	FALSE	FALSE	FALSE	7.83	32.1	217	2.31	5.02	0.49	38.7	56	13	130	2	<LOD	2	2	2	0	0
8/30/12 12:00 AM	1	1-1254	1	15	2	2	2	2	2	39.5	18.4265	158	46	TRUE	FALSE	FALSE	FALSE	4.35	40.9	204	2.31	1.41	0.6	38.1	35	21	197	1	2		1	2	0	0
8/31/12 12:00 AM	1	1-1255	1	2	2	2	2	2	2	38.7	14.533	87	11	FALSE	FALSE	FALSE	FALSE	11.91	35	285	5.59	4.92	0.74	40.3	43	15	112	2	<LOD	2	2	2	0	0
8/31/12 12:00 AM	1	1-1256	1	1	2	2	2	2	2	38	19.052	81	12.5	FALSE	FALSE	FALSE	FALSE	3.55	38	205	1.6	1.47	0.47	41.2	64	23	195	2	<LOD	2	2	2	0	0
8/31/12 12:00 AM	1	1-1257	2	2	2	2	2	2	2	38.6	15.917	85	11.5	FALSE	FALSE	FALSE	FALSE	11.29	32	205	4.81	5.27	1.07	37.8	44	19	134	2	<LOD	2	2	2	0	0
8/31/12 12:00 AM	1	1-1258	2	10	2	1	2	2	2	39	14.878	142	30	FALSE	FALSE	FALSE	FALSE	4.77	39	230	3.6	0.82	0.34	44.8	72	42	75	1	4		1	2	0	0
8/31/12 12:00 AM	1	1-1259	1	4	2	2	2	2	2	38.9	21	100	21	FALSE	FALSE	FALSE	FALSE	8.18	33.4	227	4.79	2.51	0.7	37	36	13	165	2	<LOD	2	2	2	0	0
8/31/12 12:00 AM	1	1-1260	2	3	2	1	2	2	2	39.2	15.0948	91	12.5	FALSE	FALSE	FALSE	FALSE	13.44	36.3	417	3.9	8.47	0.94	42.3	54	23	151	2	<LOD	2	2	2	0	0
2012-04-09	1	1-1261	2	4	2	1	2	2	2	38.7	17.3611	96	16	FALSE	FALSE	FALSE	FALSE	16.6	39	572	13.02	2.41	1.13	42.6	50	22	66	2	<LOD	2	2	2	#N/A	#N/A
2012-04-09	1	1-1262	2	2	2	1	1	2	2	39	15.7808	89	12.5	FALSE	FALSE	FALSE	FALSE	3.82	32.5	146	1.02	2.5	0.3	37.5	57	19	86	2	<LOD	2	2	2	0	0
2012-05-09	1	1-1263	2	2	3	2	2	2	2	38.8	16.225	86	12	FALSE	FALSE	FALSE	FALSE	6.43	30.7	128	1.82	3.53	1.04	31.2	53	69	45	2	<LOD	2	2	2	0	0
2012-05-09	1	1-1264	1	5	2	1	2	2	2	39.2	16.4461	113	21	FALSE	FALSE	FALSE	FALSE	5.1	38.5	262	2.52	2.26	0.3	37.9	42	20	60	2	<LOD	2	2	2	0	0
2012-06-09	1	1-1265	2	5	2	2	2	2	2	39.5	11.542	114	15	FALSE	FALSE	FALSE	FALSE	11.39	35.7	246	7.42	3.35	0.52	43.4	39	19	137	2	<LOD	2	2	2	0	0
2012-06-09	1	1-1266	2	12	3	1	1	2	2	39	16.8889	150	38	FALSE	FALSE	FALSE	FALSE	2.82	37.1	88	1.78	0.81	0.22	39.8	60	28	125	1	1		2	1	2	1
2012-07-09	1	1-1267	2	11	2	1	1	2	2	38.7	20.5442	148	45	FALSE	FALSE	FALSE	FALSE	5.48	42.3	82	3.41	1.65	0.36	47.1	53	26	89	1	4		1	1	2	1
2012-07-09	1	1-1268	1	1	3	2	2	2	2	38.8	16.6933	83	11.5	FALSE	FALSE	FALSE	FALSE	5.03	34.1	170	0.54	4.1	0.38	42.4	72	35	178	2	<LOD	2	2	2	0	2
2012-07-09	1	1-1269	1	8	2	1	2	2	2	39.4	16.3944	133	29	FALSE	FALSE	FALSE	FALSE	8.12	43.6	264	6.23	1.08	0.8	44	38	18	69	1	4		1	2	0	0
2012-07-09	1	1-1270	1	11	1	2	2	2	2	39.5	22.8129	142	46	FALSE	FALSE	FALSE	FALSE	12.43	37.9	269	10.05	1.51	0.81	46.7	86	162	126	2	<LOD	2	2	2	0	0
2012-07-09	1	1-1271	1	3	2	1	1	2	2	38.9	17.284	90	14	FALSE	FALSE	FALSE	FALSE	9.26	36.3	352	6.62	1.74	0.84	41.8	33	16	71	2	<LOD	2	2	2	0	0
2012-10-09	1	1-1272	2	3	2	1	2	2	2	38.2	15.1496	89	12	TRUE	FALSE	FALSE	TRUE	13.31	36.9	266	10.08	2.61	0.59	38.1	37	22	112	2	<LOD	2	2	2	0	0
2012-10-09	1	1-1273	1	5	2	2	2	2	1	38.8	15.0046	114	19.5	FALSE	FALSE	FALSE	FALSE	6.76	37.5	179	5.67	0.48	0.59	44.4	47	17	165	1	2		2	2	#N/A	#N/A
2012-10-09	1	1-1274	1	5	2	1	2	2	2	39.2	12.6962	114	16.5	FALSE	FALSE	FALSE	FALSE	12.37	36.9	193	9.43	2.27	0.66	40.1	39	11	167	2	<LOD	2	2	2	0	0
2012-10-09	1	1-1275	1	13	2	2	2	2	2	39	16.8889	150	38	FALSE	FALSE	FALSE	FALSE	5.53	43.5	245	2.97	1.94	0.49	45	29	9	120	2	<LOD	2	2	2	0	0
2012-10-09	1	1-1276	2	7	2	1	2	2	2	39	12.5976	126	20	FALSE	FALSE	FALSE	FALSE	7.27	39.8	197	5.63	1.12	0.51	45.1	40	18	74	2	<LOD	2	2	2	0	0
2012-11-09	1	1-1277	2	6	2	2	2	2	2	39.2	15.879	115	21	FALSE	FALSE	FALSE	FALSE	7.28	37.4	219	3.82	2.91	0.53	43.1	49	25	129	2	<LOD	2	2	2	0	0
2012-11-09	1	1-1278	1	12	2	2	2	2	2	39.3	14.5243	153	34	FALSE	FALSE	FALSE	FALSE	7.04	34.5	399	4	2.32	0.61	44.5	29	13	76	2	<LOD	2	2	2	0	2
2012-12-09	1	1-1279	1	7	2	2	2	2	2	38.9	12.3569	124	19	FALSE	FALSE	FALSE	FALSE	5.95	39.8	280	2.34	2.66	0.91	44.2	55	22	74	2	<LOD	2	2	2	0	0
2012-12-09	1	1-1280	1	3	2	2	2	2	2	38.8	16.0494	90	13	TRUE	FALSE	FALSE	FALSE	7.8	38.5	232	1.27	5.85	0.66	43.8	68	33	94	2	<LOD	2	2	2	0	0
2012-12-09	1	1-1281	2	2	2	2	2	2	2	39	17.1753	87	13	TRUE	FALSE	FALSE	FALSE	13.28	35	266	6.66	5.55	0.79	45.1	54	18	100	2	<LOD	2	2	2	0	0
2012-12-09	1	1-1282	1	5	2	1	2	2	2	38.7	13.0809	114	17	TRUE	FALSE	FALSE	FALSE	7.78	32.4	217	4.84	2.2	0.72	44	43	10	167	2	<LOD	2	2	2	0	0
2012-12-09	1	1-1283	1	1	3	2	2	2	2	38.5	16.3593	82	11	TRUE	FALSE	FALSE	FALSE	6.14	28.7	238	1.91	3.7	0.51	41	65	23	415	2	<LOD	2	2	2	0	0
9/14/12 12:00 AM	1	1-1284	1	8	2	1	2	2	2	39.3	17.0096	135	31	TRUE	FALSE	FALSE	FALSE	16.05	37.6	311	12.93	1.7	1.39	44	46	41	54	2	<LOD	2	2	2	0	0
9/14/12 12:00 AM	1	1-1285	1	9	2	1	2	2	2	38.7	18.6478	137	35	TRUE	FALSE	FALSE	FALSE	4.29	35.9	180	3.48	0.51	0.3	46	43	41	65	1	<LOD	1	1	1	1	1
9/14/12 12:00 AM	1	1-1286	1	2	2	1	2	2	2	38.9	14.533	87	11	TRUE	FALSE	FALSE	FALSE	12.58	33.6	242	7.11	4.78	0.67	42.7	48	42	43	2	<LOD	2	2	2	0	0
9/14/12 12:00 AM	1	1-1287	1	14	3	2	2	2	2	38.8	24.6548	156	60	FALSE	FALSE	FALSE	FALSE	5.92	40.8	145	4.32	0.76	0.81	43.5	55	34	185	1	4		1	2	0	0
9/14/12 12:00 AM	1	1-1288	2	4	3	1	2	2	2	39	18.9887	96	17.5	FALSE	FALSE	FALSE	FALSE	5.35	37.2	326	2.85	2.05	0.41	42.4	66	33	69	2	<LOD	2	2	2	0	0
9/17/12 12:00 AM	1	1-1289	2	8	2	2	2	2	2	39.2	13.7741	132	24	TRUE	FALSE	FALSE	TRUE	5.12	40.5	219	2.94	1.66	0.5	46.2	48	23	124	2	<LOD	2	2	2	0	0
9/17/12 12:00 AM	1	1-1290	1	11	1	2	2	2	2	39	16.1712	145	34	FALSE	FALSE	FALSE	FALSE	8.12	36.5	286	6.17	1.29	0.64	44.4	27	19	78	2	<LOD	2	2	2	0	0
9/17/12 12:00 AM	1	1-1291	2	8	3	2	2	1	1	39	16.0698	132	28	FALSE	FALSE	FALSE	FALSE	1.79	34.3	133	0.59	1	0.18	44.1	38	12	102	2	<LOD	2	2	2	0	0
9/17/12 12:00 AM	1	1-1292	1	1	1	2	2	2	2	38.8	14.5312	80	9.3	FALSE	FALSE	FALSE	FALSE	14.4	32.9	305	7.4	5.4	1.6	42.7	49	29	81	2	<LOD	2	2	2	0	0
9/18/12 12:00 AM	1	1-1293	2	4	3	1	2	2	2	39	19.2234	102	20	FALSE	FALSE	FALSE	FALSE	5.14	40.4	143	1.57	3.11	0.44	44.1	57	27	194	1	1		1	2	0	0
9/18/12 12:00 AM	1	1-1294	1	7	2	1	2	2	2	38.9	19.8295	123	30	FALSE	FALSE	FALSE	FALSE	6.18	41.1	237	3.43	1.95	0.78	45.4	28	8	151	2	<LOD	2	2	2	0	0
9/18/12 12:00 AM	1	1-1295	1	7	1	2	2	2	2	38	18.6287	129	31	FALSE	FALSE	FALSE	TRUE	5.36	38.8	312	4.16	0.78	0.36	44.1	31	23	162	2	<LOD	2	2	2	0	0
9/20/12 12:00 AM	1	1-1296	2	3	2	2	2	2	2	38.7	15	100	15	FALSE	FALSE	FALSE	FALSE	7.23	36	327	5.26	1.52	0.44	46.8	55	35	96	2	<LOD	2	2	2	0	0
9/24/12 12:00 AM	1	1-1297	1	6	2	1	2	2	2	38.6	17.9546	118	25	FALSE	FALSE	FALSE	FALSE	5.54	35.8	107	2.21	2.56	0.76	45.6	47	17	110	2	<LOD	2	2	2	0	2
9/24/12 12:00 AM	1	1-1298	2	4	2	2	2	2	2	38.7	20.8247	98	20	FALSE	FALSE	FALSE	FALSE	9.86	36.7	291	5.51	3.35	0.84	44.9	45	18	99	2	<LOD	2	2	2	0	0
9/24/12 12:00 AM	1	1-1299	2	9	3	2	2	2	2	38.9	14.9182	137	28	FALSE	FALSE	FALSE	FALSE	7.4	36.1	276	4.29	2.52	0.49	43.4	52	15	100	2	<LOD	2	2	2	0	0
9/25/12 12:00 AM	1	1-1300	1	9	1	2	2	2	2	39.2	18.9036	138	36	FALSE	FALSE	FALSE	FALSE	19.52	36.9	332	14.39	3.67	1.07	45.7	17	9	67	2	<LOD	2	2	2	0	0
9/26/12 12:00 AM	1	1-1301	2	2	2	2	2	2	2	38.8	15.5896	84	11	FALSE	FALSE	FALSE	FALSE	11.78	35.5	337	6.48	4.15	0.98	38.5	35	19	73	2	<LOD	2	2	2	0	0
9/26/12 12:00 AM	1	1-1302	1	11	1	2	2	2	2	39	17.313	152	40	FALSE	FALSE	FALSE	FALSE	17.24	39	336	13.82	2.32	0.77	48.4	26	13	151	2	<LOD	2	2	2	0	0
9/27/12 12:00 AM	1	1-1303	1	5	3	2	2	2	2	38.7	14.4917	116	19.5	FALSE	FALSE	FALSE	FALSE	7.8	37.5	119	5.46	1.91	0.38	40.6	39	17	75	2	<LOD	2	2	2	0	2
9/27/12 12:00 AM	1	1-1304	2	6	2	2	2	2	2	38.8	16.0713	117	22	FALSE	FALSE	FALSE	FALSE	4.98	39.7	209	2.99	1.43	0.55	48.5	52	23	119	2	<LOD	2	2	2	0	0
9/27/12 12:00 AM	1	1-1305	1	13	1	2	2	2	1	38.7	16.0256	156	39	FALSE	FALSE	FALSE	FALSE	8.47	34.7	298	5.2	2.27	0.49	40.5	42	15	238	2	<LOD	2	2	2	0	0
9/28/12 12:00 AM	1	1-1306	2	1	3	2	2	2	2	38.9	16.4062	80	10.5	TRUE	FALSE	FALSE	TRUE	3.37	34.2	151	0.66	2.49	0.21	43	98	53	123	1	1		1	2	0	0
9/28/12 12:00 AM	1	1-1307	1	6	2	2	2	2	2	39.1	21.1849	117	29	FALSE	FALSE	FALSE	FALSE	5.15	37.5	246	2.95	1.65	0.51	48	41	16	105	2	<LOD	2	2	2	0	0
9/28/12 12:00 AM	1	1-1308	1	7	3	2	2	2	2	38.7	12.2942	121	18	FALSE	FALSE	FALSE	FALSE	7.13	33.6	292	4.95	1.7	0.48	48.2	40	12	63	2	<LOD	2	2	2	0	0
9/28/12 12:00 AM	1	1-1309	2	1	2	1	2	2	2	38.7	16.4366	78	10	FALSE	FALSE	FALSE	FALSE	12.89	31.6	138	4.48	6.55	1.68	44.4	35	16	72	2	<LOD	2	2	2	0	2
2012-01-10	1	1-1310	2	2	1	2	2	2	2	38.6	19.3337	82	13	FALSE	FALSE	FALSE	FALSE	7.95	38.6	236	5.16	1.5	1.26	48.3	54	18	45	2	<LOD	2	2	2	0	0
2012-01-10	1	1-1311	2	1	2	2	2	2	1	38.7	21.9138	74	12	TRUE	FALSE	FALSE	TRUE	7.37	37.1	149	3.58	3.33	0.45	47.2	54	26	172	2	<LOD	2	2	2	0	2
2012-01-10	1	1-1312	2	7	2	2	2	2	2	39.8	14.348	132	25	FALSE	FALSE	FALSE	FALSE	6.45	39.6	126	4.08	1.84	0.39	46	76	20	65	1	<LOD	1	1	2	0	0
2012-01-10	1	1-1313	2	5	2	2	1	2	2	39	10.586	115	14	TRUE	FALSE	FALSE	FALSE	7.54	32.9	226	5.14	1.76	0.59	46.2	55	15	168	2	<LOD	2	2	2	0	0
2012-01-10	1	1-1314	2	4	2	1	2	2	2	38	15.191	96	14	FALSE	FALSE	FALSE	FALSE	4.22	39.7	218	2.31	1.28	0.6	44.2	54	20	92	2	<LOD	2	2	2	0	0
2012-02-10	1	1-1315	1	7	2	2	2	2	2	38.7	12.4	127	20	FALSE	FALSE	FALSE	FALSE	5.64	37.6	188	3.74	1.37	0.51	49.1	42	16	104	2	<LOD	2	2	2	0	0
2012-03-10	1	1-1316	2	6	2	2	2	2	2	39	10.9577	117	15	FALSE	FALSE	FALSE	FALSE	7.89	39.2	193	6.35	1.19	0.34	43.3	46	25	71	2	<LOD	2	2	2	0	0
2012-03-10	1	1-1317	1	8	1	2	2	2	2	38.7	11.4784	132	20	FALSE	FALSE	FALSE	FALSE	5.58	38.1	200	2.73	2.29	0.54	41.7	45	29	43	2	<LOD	2	2	2	0	0
2012-03-10	1	1-1318	2	5	2	2	2	2	2	38.8	19.2367	114	25	FALSE	FALSE	FALSE	FALSE	13.49	39.3	303	7.45	4.93	1.06	45.1	42	16	138	2	<LOD	2	2	2	0	2
2012-04-10	1	1-1319	1	12	1	2	2	2	2	39	21.3675	156	52	FALSE	FALSE	FALSE	FALSE	13.1	40.8	212	9.86	2.01	1.21	46.4	27	7	70	2	<LOD	2	2	2	0	0
2012-05-10	1	1-1320	2	1	2	2	2	2	2	38.8	18.3256	72	9.5	FALSE	FALSE	FALSE	FALSE	10.31	37.2	235	5.4	4.24	0.66	42.1	64	21	41	2	<LOD	2	2	2	0	0
2012-05-10	1	1-1321	1	2	3	2	2	2	2	38.7	19.7239	78	12	FALSE	FALSE	FALSE	FALSE	7.53	34.2	296	2.38	4.61	0.5	39.3	51	17	176	2	<LOD	2	2	2	0	0
2012-05-10	1	1-1322	1	3	2	2	2	2	2	38.9	15.0948	91	12.5	TRUE	FALSE	FALSE	FALSE	8.03	34.3	207	5.23	2.02	0.73	42.1	34	15	90	2	<LOD	2	2	2	0	0
2012-05-10	1	1-1323	1	2	3	2	2	2	2	38.7	22.5069	76	13	FALSE	FALSE	FALSE	FALSE	2.69	34.2	126	0.9	1.56	0.21	41.7	50	19	135	2	<LOD	2	2	2	0	2
2012-05-10	1	1-1324	2	2	2	2	2	2	2	38.9	16.4062	80	10.5	FALSE	FALSE	FALSE	FALSE	12.99	37.2	422	8.36	3.7	0.91	39.1	49	23	81	2	<LOD	2	2	2	0	0
2012-05-10	1	1-1325	1	9	3	2	2	2	2	39	23.8083	139	46	FALSE	FALSE	FALSE	FALSE	4.96	46.1	243	2.74	1.61	0.5	45.3	34	13	78	2	<LOD	2	2	2	0	0
2012-05-10	1	1-1326	1	7	2	2	2	2	2	38.6	14.308	124	22	FALSE	FALSE	FALSE	FALSE	15.11	30	283	8.72	3.54	1.16	39.1	39	21	122	2	<LOD	2	2	2	0	0
2012-08-10	1	1-1327	1	12	3	2	2	2	2	38.5	21.6713	165	59	FALSE	FALSE	FALSE	FALSE	4.81	44.2	156	3.13	1.21	0.46	45	31	16	230	2	<LOD	2	2	2	0	0
2012-08-10	1	1-1328	2	9	3	2	2	2	2	37.6	24.6797	138	47	FALSE	FALSE	FALSE	FALSE	4.62	43	139	2.42	1.79	0.41	43.6	45	29	161	2	<LOD	2	2	2	0	1
2012-08-10	1	1-1329	2	1	2	2	2	2	2	38.8	19.2308	78	11.7	FALSE	FALSE	FALSE	FALSE	13.32	41.4	293	7.26	4.87	1.16	44.3	57	21	144	2	<LOD	2	2	2	0	0
2012-08-10	1	1-1330	2	9	3	2	2	2	2	38	12.6024	138	24	FALSE	FALSE	FALSE	FALSE	3.15	42.9	214	1.75	0.99	0.4	48.8	49	17	137	2	<LOD	2	2	2	0	0
2012-08-10	1	1-1331	1	7	1	2	2	2	2	38.2	13.4372	122	20	FALSE	FALSE	FALSE	FALSE	6.23	37.8	228	5.11	0.71	0.31	50.5	34	15	151	2	<LOD	2	2	2	0	0
2012-09-10	1	1-1332	1	6	2	2	2	2	2	38.8	15.8001	118	22	TRUE	FALSE	FALSE	FALSE	4.48	41.2	144	2.75	1.36	0.36	43.2	41	19	57	2	<LOD	2	2	2	0	2
2012-09-10	1	1-1333	1	4	2	2	2	2	2	39	22.7865	96	21	FALSE	FALSE	FALSE	FALSE	16.56	39	273	12.58	3.05	0.85	41.5	33	11	84	2	<LOD	2	2	2	0	0
2012-09-10	1	1-1334	1	5	2	2	2	2	2	38.9	18.9036	115	25	TRUE	FALSE	FALSE	FALSE	6.04	35.8	201	2.84	2.57	0.61	45.2	42	17	232	2	<LOD	2	2	2	0	0
2012-09-10	1	1-1335	1	2	1	1	2	2	2	39	23.2254	83	16	TRUE	FALSE	FALSE	FALSE	21.48	38.1	283	10.9	8.58	1.83	43.1	30	13	42	2	<LOD	2	2	2	0	0
2012-09-10	1	1-1336	1	2	2	2	2	2	2	38.7	17.0068	84	12	TRUE	FALSE	FALSE	FALSE	7.9	38.8	217	5.7	1.7	0.5	44.9	62	64	69	2	<LOD	2	2	2	0	0
2012-10-10	1	1-1337	2	6	2	2	2	2	2	38.7	13.8504	114	18	FALSE	FALSE	FALSE	FALSE	10.3	34.7	323	4.2	4.8	1.3	42.3	65	88	72	2	<LOD	2	2	2	0	0
2012-10-10	1	1-1338	1	4	2	2	2	2	2	38.8	20.3712	94	18	FALSE	FALSE	FALSE	FALSE	20.9	38	381	14.4	4.8	1.8	44.1	34	15	65	2	<LOD	2	2	2	0	0
2012-11-10	1	1-1339	2	11	3	2	1	2	2	38.8	9.45102	156	23	FALSE	FALSE	FALSE	FALSE	4.23	38.2	184	2.86	1.07	0.29	41.7	38	18	86	1	1		1	2	0	0
2012-12-10	1	1-1340	1	10	2	2	2	2	2	38.8	27.6787	146	59	FALSE	FALSE	FALSE	FALSE	10.84	42.2	265	7.02	2.68	0.66	48.5	87	28	32	2	<LOD	2	2	2	0	0
2012-12-10	1	1-1341	1	5	3	2	2	2	2	39	12.5303	113	16	FALSE	FALSE	FALSE	FALSE	5.71	39.6	243	3.56	1.75	0.4	42.2	57	27	108	2	<LOD	2	2	2	0	0
10/15/12 12:00 AM	1	1-1342	1	14	3	2	2	2	2	39	22.7615	161	59	FALSE	FALSE	FALSE	FALSE	10.31	42.5	256	6.44	2.98	0.87	42.6	49	17	106	2	<LOD	2	2	2	0	0
10/16/12 12:00 AM	1	1-1343	2	7	3	1	2	2	2	38.9	20.4904	121	30	FALSE	FALSE	FALSE	FALSE	4.84	38	144	1.91	2.55	0.38	43.4	36	11	119	2	<LOD	2	2	2	0	0
10/16/12 12:00 AM	1	1-1344	1	12	2	2	2	2	2	39	23.74	148	52	FALSE	FALSE	FALSE	FALSE	9.3	37.8	213	7.3	1.4	0.6	46.3	52	30	102	2	<LOD	2	2	2	0	0
10/16/12 12:00 AM	1	1-1345	1	5	2	2	2	2	2	38.7	18.4672	114	24	FALSE	FALSE	FALSE	FALSE	8	39.5	265	5.5	1.6	0.8	48.5	37	12	108	2	<LOD	2	2	2	0	0
10/17/12 12:00 AM	1	1-1346	1	2	1	2	2	2	2	38.9	18.424	84	13	FALSE	FALSE	FALSE	FALSE	6.93	37.6	187	3.72	2.14	0.94	43.9	48	15	176	2	<LOD	2	2	2	0	2
10/17/12 12:00 AM	1	1-1347	1	14	3	2	1	2	2	38.8	22.1893	156	54	FALSE	FALSE	FALSE	FALSE	3.73	25.7	122	1.21	2.17	0.3	37.8	32	15	50	2	<LOD	2	2	2	0	0
10/18/12 12:00 AM	1	1-1348	1	9	2	2	2	2	2	39	13.5164	136	25	TRUE	FALSE	FALSE	FALSE	3.09	39.4	167	1.41	1.32	0.34	47	44	25	76	1	2		1	2	0	0
10/18/12 12:00 AM	1	1-1349	1	4	2	1	2	2	2	38.7	20.1934	97	19	FALSE	FALSE	FALSE	FALSE	11.11	35.1	233	8.11	2.23	0.7	45.3	20	15	93	2	<LOD	2	1	2	0	0
10/19/12 12:00 AM	1	1-1350	1	2	1	2	2	2	2	38	18.902	78	11.5	FALSE	FALSE	FALSE	FALSE	16.3	40.8	270	14.92	1.14	0.22	44.7	51	14	124	2	<LOD	2	2	2	0	0
10/19/12 12:00 AM	1	1-1351	2	8	3	1	2	2	2	39	12.8091	134	23	FALSE	FALSE	FALSE	FALSE	3.39	37.7	137	1.87	1.13	0.39	43.8	42	17	94	1	1		1	1	1	1
10/19/12 12:00 AM	1	1-1352	2	7	2	1	1	2	2	38.7	14.6984	133	26	FALSE	FALSE	FALSE	FALSE	7.17	42	191	5.55	1.11	0.51	46.5	36	13	42	2	<LOD	2	2	2	0	0
10/19/12 12:00 AM	1	1-1353	2	1	3	2	2	2	1	39	20.4444	75	11.5	TRUE	FALSE	FALSE	FALSE	8.97	34.5	130	3.54	4.59	0.83	43.8	51	10	130	2	<LOD	2	2	2	0	2
10/19/12 12:00 AM	1	1-1354	1	9	3	2	1	2	2	38.9	10.9739	135	20	TRUE	FALSE	FALSE	FALSE	3.59	37.8	156	2.59	0.8	0.19	45	57	16	132	1	4		1	1	2	1
10/22/12 12:00 AM	1	1-1355	2	6	3	2	2	1	2	38	21.5455	118	30	FALSE	FALSE	FALSE	FALSE	7.39	38.1	270	3.34	3.45	0.53	46.1	60	20	109	1	4		2	2	0	0
10/22/12 12:00 AM	1	1-1356	2	4	1	2	2	2	2	39	24.0292	102	25	FALSE	FALSE	FALSE	FALSE	8.49	38	185	3.58	4.3	0.59	40.9	38	13	110	2	<LOD	2	2	2	0	0
10/22/12 12:00 AM	1	1-1357	2	4	1	2	2	2	2	38.2	16.3265	105	18	FALSE	FALSE	FALSE	FALSE	7.65	37.9	176	4.83	2.04	0.64	45.3	35	10	120	2	<LOD	2	2	2	0	0
10/22/12 12:00 AM	1	1-1358	2	7	2	2	2	2	2	38	15.5331	123	23.5	FALSE	FALSE	FALSE	FALSE	5.31	38.2	268	3.05	1.79	0.47	42.6	40	12	59	1	4		1	2	0	0
10/22/12 12:00 AM	1	1-1359	1	7	3	2	2	2	2	38.8	13.4372	122	20	FALSE	FALSE	FALSE	FALSE	6.13	44.7	320	1.99	3.48	0.6	45.8	45	17	189	2	<LOD	2	2	2	0	0
10/23/12 12:00 AM	1	1-1360	2	8	3	2	2	2	2	38.7	11.4784	132	20	FALSE	FALSE	FALSE	FALSE	3.62	38.8	194	0.83	2.43	0.34	39.4	84	19	669	2	<LOD	2	2	2	0	0
10/23/12 12:00 AM	1	1-1361	1	1	2	2	2	2	2	38.8	16.4366	78	10	FALSE	FALSE	FALSE	FALSE	7.93	35.3	180	2.84	4.26	0.73	50.1	106	33	365	2	<LOD	2	2	2	0	0
10/23/12 12:00 AM	1	1-1362	2	2	2	2	2	2	2	38.7	16.0037	81	10.5	FALSE	FALSE	FALSE	FALSE	4.88	35.8	156	0.89	3.7	0.26	45.1	83	17	194	2	<LOD	2	2	2	0	0
10/23/12 12:00 AM	1	1-1363	1	7	3	2	2	2	2	38.8	18.8121	122	28	FALSE	FALSE	FALSE	FALSE	7.51	38.7	183	5.48	1.36	0.67	44.1	54	9	158	2	<LOD	2	2	2	0	0
10/23/12 12:00 AM	1	1-1364	1	5	1	2	2	2	2	38	15.3046	99	15	FALSE	FALSE	FALSE	FALSE	16.4	38.8	252	9.54	3.86	1.27	43.9	40	14	70	2	<LOD	2	2	2	0	0
10/23/12 12:00 AM	1	1-1365	2	5	3	2	2	2	1	39	18.7955	113	24	FALSE	FALSE	TRUE	FALSE	4.33	34.6	230	1.1	2.88	0.31	46.3	39	12	121	2	<LOD	2	2	2	0	0
10/24/12 12:00 AM	1	1-1366	1	10	2	1	1	2	2	38.9	19.2901	144	40	FALSE	FALSE	FALSE	FALSE	7.18	40.9	163	5.09	1.16	0.89	45.8	70	51	94	1	4		1	1	2	1
10/24/12 12:00 AM	1	1-1367	1	13	3	2	2	2	2	39	14.1994	157	35	FALSE	FALSE	FALSE	FALSE	2.07	39.8	89	0.94	0.97	0.15	41.1	52	16	432	2	<LOD	2	2	2	0	0
10/25/12 12:00 AM	1	1-1368	2	8	2	1	1	2	1	39	17.8417	136	33	FALSE	FALSE	FALSE	FALSE	7.08	35.8	191	4.54	2.04	0.5	42.3	35	12	142	2	<LOD	2	2	2	0	0
10/25/12 12:00 AM	1	1-1369	1	3	1	2	2	2	2	39	16.976	94	15	FALSE	FALSE	FALSE	FALSE	4.86	35.1	203	4.03	0.56	0.19	47.9	34	19	74	2	<LOD	2	2	2	0	0
10/25/12 12:00 AM	1	1-1370	2	13	1	1	2	2	2	39.5	26.2336	161	68	TRUE	FALSE	FALSE	FALSE	6.68	38.4	191	5.54	0.6	0.53	45.8	32	20	163	1	4		1	2	0	0
10/25/12 12:00 AM	1	1-1371	1	5	2	1	2	2	2	38.8	15.3894	114	20	TRUE	FALSE	FALSE	FALSE	8.95	38.9	106	3.87	4.14	0.89	47.9	54	21	136	2	<LOD	2	2	2	0	0
10/25/12 12:00 AM	1	1-1372	1	1	1	2	2	2	2	38.7	16.3556	75	9.2	FALSE	FALSE	FALSE	FALSE	5.77	36.5	220	2.75	2.6	0.37	42.5	42	19	311	2	<LOD	2	2	2	0	0
10/25/12 12:00 AM	1	1-1373	2	5	2	1	1	2	2	39	18.1474	115	24	FALSE	FALSE	FALSE	FALSE	5.08	36.8	141	1.69	2.69	0.63	43.3	40	8	99	2	<LOD	2	2	2	0	0
10/25/12 12:00 AM	1	1-1374	1	3	3	2	2	2	2	38	17.7221	92	15	FALSE	FALSE	FALSE	FALSE	5.07	43.1	154	1.38	3.38	0.27	44.8	49	15	144	2	<LOD	2	2	2	0	0
10/25/12 12:00 AM	1	1-1375	2	3	3	2	2	2	2	38.7	16.3024	91	13.5	FALSE	FALSE	FALSE	FALSE	5.6	32.9	149	3.28	1.74	0.58	43.7	48	12	83	1	3		1	2	0	0
10/25/12 12:00 AM	1	1-1376	2	3	2	1	2	2	2	39	17.1314	92	14.5	FALSE	FALSE	FALSE	FALSE	4.63	34	104	1.39	2.98	0.21	41.1	42	12	141	2	<LOD	2	2	2	0	0
10/25/12 12:00 AM	1	1-1377	2	7	1	2	1	2	2	38.6	16.7966	122	25	FALSE	FALSE	FALSE	FALSE	19.65	41.1	246	17.49	1.18	0.77	49.3	33	5	98	2	<LOD	2	2	2	0	2
10/25/12 12:00 AM	1	1-1378	1	1	2	2	2	2	2	38.9	16.9297	78	10.3	FALSE	FALSE	FALSE	FALSE	9.67	37.6	319	5.13	3.62	0.9	46.8	58	21	125	2	<LOD	2	2	2	0	0
10/25/12 12:00 AM	1	1-1379	1	1	2	2	2	2	2	37.8	15.5817	76	9	FALSE	FALSE	FALSE	FALSE	11.21	32.7	228	8.28	2.31	0.61	45.6	42	15	125	2	<LOD	2	2	2	0	0
10/25/12 12:00 AM	1	1-1380	1	10	3	2	2	2	2	38.9	22.5215	149	50	FALSE	FALSE	FALSE	FALSE	2.56	40.8	173	1.57	0.69	0.29	45.2	59	23	348	1	4		1	2	0	0
10/26/12 12:00 AM	1	1-1381	1	5	3	2	1	2	2	39.5	17.2292	113	22	FALSE	FALSE	FALSE	FALSE	6.19	39.4	186	2.47	3.35	0.32	44	33	19	109	2	<LOD	2	2	2	0	0
10/26/12 12:00 AM	1	1-1382	2	2	2	1	2	2	2	38.9	14.5159	83	10	FALSE	FALSE	FALSE	FALSE	7.74	37.4	128	3.7	3.36	0.65	43.1	66	23	158	2	<LOD	2	2	2	0	0
10/26/12 12:00 AM	1	1-1383	2	1	2	1	2	2	2	39.2	18.0802	78	11	FALSE	FALSE	FALSE	FALSE	10.6	38.6	286	5.1	4.3	1.18	36.5	47	27	59	2	<LOD	2	2	2	0	0
10/26/12 12:00 AM	1	1-1384	1	3	2	2	2	2	2	38.9	14.7125	94	13	FALSE	FALSE	FALSE	FALSE	4.93	34.8	220	1.36	2.97	0.42	46	47	19	118	1	2		2	2	0	0
10/26/12 12:00 AM	1	1-1385	1	11	3	2	1	2	1	39.5	20.4082	140	40	FALSE	FALSE	FALSE	FALSE	4.61	41.1	143	2.87	1.26	0.47	52.8	26	3	172	2	<LOD	2	2	2	0	2
10/29/12 12:00 AM	1	1-1386	1	7	3	1	1	1	2	38.9	22.8433	122	34	FALSE	FALSE	FALSE	FALSE	3.7	38.9	205	1.8	1.44	0.44	42.5	45	12	159	2	<LOD	2	2	2	0	2
10/29/12 12:00 AM	1	1-1387	1	2	1	2	2	2	2	38.4	20.2812	86	15	FALSE	FALSE	FALSE	FALSE	17.32	34.5	427	11.33	4.87	0.94	44.7	33	10	110	2	<LOD	2	2	2	0	0
10/29/12 12:00 AM	1	1-1388	2	5	3	1	2	2	2	38	14.876	110	18	FALSE	FALSE	FALSE	FALSE	3.67	40.7	190	1.35	2.01	0.25	44.1	49	12	99	1	1		1	2	0	0
10/29/12 12:00 AM	1	1-1389	1	1	2	2	2	2	2	37.6	17.2584	78	10.5	FALSE	FALSE	FALSE	FALSE	6.44	34.3	151	4.25	1.46	0.71	44.9	44	16	63	2	<LOD	2	2	2	0	0
10/29/12 12:00 AM	1	1-1390	2	8	3	2	2	2	2	39	14.2661	135	26	FALSE	FALSE	FALSE	FALSE	5.25	37	210	3.72	1.16	0.37	45.5	41	15	117	2	<LOD	2	2	2	0	0
10/29/12 12:00 AM	1	1-1391	2	1	2	2	2	2	2	38	17.7778	75	10	FALSE	FALSE	FALSE	FALSE	6.77	35.1	321	2.58	3.47	0.69	45	52	21	158	2	<LOD	2	2	2	0	0
10/30/12 12:00 AM	1	1-1392	2	3	2	2	2	2	2	38.8	17.1314	92	14.5	FALSE	FALSE	FALSE	FALSE	8.22	34.1	267	4.9	2.52	0.77	43.6	46	14	115	2	<LOD	2	2	2	0	0
10/30/12 12:00 AM	1	1-1393	2	2	2	2	2	2	2	38.7	19.3337	82	13	FALSE	FALSE	FALSE	FALSE	16.16	31.7	346	9.27	5.54	0.96	41.9	38	45	35	2	<LOD	2	2	2	0	0
10/30/12 12:00 AM	1	1-1394	1	3	2	2	2	2	1	39	17.284	90	14	TRUE	FALSE	FALSE	FALSE	9.89	33.6	360	5.73	3.65	0.48	40.8	33	8	69	2	<LOD	2	2	2	0	0
10/31/12 12:00 AM	1	1-1395	2	5	2	2	2	2	2	38.7	15.015	111	18.5	FALSE	FALSE	FALSE	FALSE	4.26	38.8	192	2.41	1.45	0.4	42.7	34	14	56	2	<LOD	2	2	2	0	0
10/31/12 12:00 AM	1	1-1396	2	1	1	2	2	2	2	39	23.4566	73	12.5	FALSE	FALSE	FALSE	FALSE	8.43	37.6	226	3.5	3.73	1.12	46.5	49	17	124	2	<LOD	2	2	2	0	2
10/31/12 12:00 AM	1	1-1397	2	6	2	2	2	2	2	39	16.6352	115	22	FALSE	FALSE	FALSE	FALSE	5.43	37.4	161	1.41	3.39	0.52	41.7	46	25	337	2	<LOD	2	2	2	0	0
10/31/12 12:00 AM	1	1-1398	2	3	2	2	2	2	2	39	18.1138	91	15	FALSE	FALSE	FALSE	FALSE	9.6	36.3	214	3.44	5.4	0.63	39.9	54	34	74	2	<LOD	2	2	2	0	0
10/31/12 12:00 AM	1	1-1399	1	5	3	2	2	2	2	38.7	15.9439	112	20	FALSE	FALSE	FALSE	FALSE	4.69	35.5	175	1.61	2.41	0.57	42.5	57	21	137	2	<LOD	2	2	2	0	0
10/31/12 12:00 AM	1	1-1400	2	5	2	2	2	2	2	38.2	13.7976	111	17	FALSE	FALSE	FALSE	FALSE	5.44	36.4	164	2.67	2.34	0.42	39.8	79	44	108	1	4		1	2	0	0
10/31/12 12:00 AM	1	1-1401	2	15	3	2	2	2	2	38	22.8329	158	57	FALSE	FALSE	FALSE	FALSE	4.85	38.4	174	3.08	1.17	0.59	43.4	30	22	151	1	4		1	2	0	0
10/31/12 12:00 AM	1	1-1402	1	5	2	2	2	2	2	39.2	18.7955	113	24	FALSE	FALSE	FALSE	FALSE	5.22	40.6	170	1.58	2.92	0.71	43.6	66	30	181	2	<LOD	2	2	2	0	0
10/31/12 12:00 AM	1	1-1403	2	2	2	2	2	2	2	38.7	17.4329	88	13.5	FALSE	FALSE	FALSE	FALSE	15.5	32.8	283	9.04	4.91	1.44	38.8	42	16	105	2	<LOD	2	2	2	0	0
10/31/12 12:00 AM	1	1-1404	1	2	2	2	2	1	2	38.6	14.1723	84	10	FALSE	FALSE	FALSE	FALSE	11.2	32.8	368	7.12	3.29	0.77	43.6	39	19	96	2	<LOD	2	2	2	0	0
10/31/12 12:00 AM	1	1-1405	2	6	3	2	2	2	2	39.3	16.5182	118	23	FALSE	FALSE	FALSE	FALSE	3.11	41.1	124	1.47	1.38	0.26	41.7	71	18	134	2	<LOD	2	2	2	0	0
10/31/12 12:00 AM	1	1-1406	1	14	3	2	2	2	2	39	16.3265	175	50	FALSE	FALSE	FALSE	FALSE	2.85	41.7	132	1.89	0.7	0.23	46	27	5	110	1	4		1	2	0	0
2012-01-11	1	1-1407	1	1	2	1	2	2	1	38.7	25.5661	74	14	FALSE	FALSE	FALSE	FALSE	4.19	34.1	81	1.28	2.52	0.28	43.3	90	59	260	2	<LOD	2	2	2	0	2
2012-01-11	1	1-1408	1	10	2	1	2	2	2	38.9	13.3333	150	30	FALSE	FALSE	FALSE	FALSE	6.85	38.3	235	5.09	1.07	0.68	50	34	9	129	2	<LOD	2	2	2	0	0
2012-01-11	1	1-1409	2	3	3	2	2	2	2	38	16.276	96	15	FALSE	FALSE	FALSE	FALSE	3.5	36.9	60	1.14	2.08	0.26	39.2	72	30	82	2	<LOD	2	2	2	0	0
2012-01-11	1	1-1410	2	9	3	2	2	2	1	37.8	20.7029	139	40	FALSE	FALSE	FALSE	FALSE	8.82	39.9	178	2.74	5.35	0.56	41.9	45	26	54	2	<LOD	2	2	2	0	0
2012-01-11	1	1-1411	2	5	3	1	2	2	1	38.6	13.3135	113	17	FALSE	FALSE	FALSE	FALSE	6.51	34.2	254	3.41	2.68	0.41	40.8	51	15	133	2	<LOD	2	2	2	0	0
2012-01-11	1	1-1412	2	8	3	2	2	2	2	39.2	19.4921	134	35	FALSE	FALSE	TRUE	TRUE	6.82	36.5	223	3.89	2.31	0.44	44.8	37	16	150	2	<LOD	2	2	2	0	0
2012-02-11	1	1-1413	1	1	2	2	2	2	2	38.9	20.7756	76	12	FALSE	FALSE	FALSE	FALSE	12.46	34.1	245	5.36	5.79	1.14	41.7	41	15	106	2	<LOD	2	2	2	0	0
2012-02-11	1	1-1414	1	4	2	1	2	2	2	38.5	30.3819	96	28	TRUE	FALSE	FALSE	FALSE	14.65	42.8	195	12.48	0.89	1.26	41.2	53	45	51	2	<LOD	2	2	2	0	0
2012-02-11	1	1-1415	2	2	2	2	2	2	2	40	20.0692	85	14.5	FALSE	FALSE	FALSE	FALSE	22.63	34.3	229	16.42	4.49	1.65	39.5	51	84	116	2	<LOD	2	2	2	0	0
2012-02-11	1	1-1416	2	6	1	2	2	2	2	38.2	13.6455	118	19	FALSE	FALSE	FALSE	FALSE	9.34	35.8	260	6.7	1.9	0.63	46.7	40	16	136	2	<LOD	2	2	2	0	2
2012-02-11	1	1-1417	1	3	1	2	2	2	2	37.7	16.276	96	15	FALSE	FALSE	FALSE	FALSE	13.5	34.1	327	7.96	4.36	1.02	45.2	40	27	75	2	<LOD	2	2	2	0	0
2012-02-11	1	1-1418	2	9	3	2	2	2	2	39	21.1849	119	30	FALSE	FALSE	FALSE	FALSE	2.93	36.9	145	0.86	1.8	0.24	41.4	34	11	71	2	<LOD	2	2	2	0	0
2012-02-11	1	1-1419	1	2	2	2	2	2	2	39	16	100	16	FALSE	FALSE	FALSE	FALSE	7.91	36.5	365	3.65	3.83	0.38	38.4	34	16	87	2	<LOD	2	2	2	0	0
2012-02-11	1	1-1420	1	2	3	2	2	2	2	38.4	17.9931	85	13	FALSE	FALSE	FALSE	FALSE	3.83	34.7	204	1.1	2.36	0.36	41.6	66	27	219	2	<LOD	2	2	2	0	0
2012-02-11	1	1-1421	1	2	1	1	2	2	2	38.6	20.9877	90	17	FALSE	FALSE	FALSE	FALSE	13.09	41.3	77	8.47	3.44	1.16	42.3	48	61	68	2	<LOD	2	2	2	0	0
2012-02-11	1	1-1422	1	12	3	1	2	2	1	37.8	23.1911	154	55	FALSE	FALSE	FALSE	FALSE	4.7	37.7	185	2.58	1.75	0.35	40.8	80	61	103	1	1		2	2	0	0
2012-02-11	1	1-1423	1	5	1	2	2	2	2	39	11.542	114	15	FALSE	FALSE	FALSE	FALSE	7.55	36.1	249	4.15	2.86	0.5	41	39	12	66	2	<LOD	2	2	2	0	0
2012-05-11	1	1-1424	2	7	1	2	2	2	2	38	27.497	116	37	FALSE	FALSE	FALSE	FALSE	6.95	39.7	224	5.27	0.97	0.68	46.4	58	59	129	1	3		1	2	0	0
2012-05-11	1	1-1425	1	5	2	2	2	2	2	38.2	15.0819	118	21	FALSE	FALSE	FALSE	FALSE	8.17	37.5	121	6.02	1.52	0.5	43.9	52	23	138	1	4		2	1	2	1
2012-05-11	1	1-1426	1	7	3	2	2	2	2	37.7	15.2588	128	25	FALSE	FALSE	FALSE	FALSE	10.75	36.4	236	7.95	2.16	0.62	44.1	50	42	85	2	<LOD	2	2	2	0	0
2012-05-11	1	1-1427	1	6	2	2	2	2	2	38.3	12.2942	121	18	FALSE	FALSE	FALSE	FALSE	5.11	37	194	3.2	1.44	0.45	45	55	22	100	2	<LOD	2	2	2	0	0
2012-05-11	1	1-1428	2	6	3	1	1	2	2	38.2	20.8333	120	30	TRUE	FALSE	FALSE	FALSE	2.67	36.2	73	1.27	0.98	0.4	43.5	92	66	80	1	<LOD	1	2	2	0	0
2012-06-11	1	1-1429	1	1	3	1	2	2	2	38.2	14.8721	82	10	FALSE	FALSE	FALSE	FALSE	17.3	30.8	326	7.11	8.58	1.59	41.9	37	18	154	2	<LOD	2	2	2	0	0
2012-06-11	1	1-1430	1	2	2	2	2	2	2	38.8	14.5773	98	14	FALSE	FALSE	FALSE	FALSE	9.43	35.1	232	3.96	4.62	0.76	41.2	44	17	131	2	<LOD	2	2	2	0	2
2012-06-11	1	1-1431	2	3	1	1	2	2	2	39.2	16.8186	96	15.5	FALSE	FALSE	FALSE	FALSE	7.54	35.7	269	3.83	2.99	0.71	42.4	29	12	49	2	<LOD	2	2	2	0	0
2012-06-11	1	1-1432	1	9	2	1	2	2	2	38.7	18.6478	137	35	FALSE	FALSE	FALSE	FALSE	3.11	40.8	169	1.65	1.05	0.39	44.2	38	22	78	2	<LOD	2	2	2	0	0
2012-06-11	1	1-1433	1	6	2	1	2	2	2	39	17.3611	120	25	FALSE	FALSE	FALSE	FALSE	7.48	36.5	204	3.62	3.48	0.29	41.8	41	26	145	2	<LOD	2	2	2	0	0
2012-06-11	1	1-1434	1	7	2	2	2	2	2	39.1	25.8546	118	36	TRUE	FALSE	FALSE	FALSE	7.69	41.4	248	4.77	2.24	0.62	44	23	27	177	2	<LOD	2	2	2	0	0
2012-06-11	1	1-1435	1	3	3	2	2	2	2	38.8	14.2399	106	16	FALSE	FALSE	FALSE	FALSE	14.42	38.1	334	10.94	2.43	1.01	46.5	26	12	84	2	<LOD	2	2	2	0	0
2012-07-11	1	1-1436	2	3	2	1	1	2	2	38.7	16.276	96	15	FALSE	FALSE	FALSE	FALSE	15.09	34.3	579	9.69	3.86	1.49	44.3	59	19	89	2	<LOD	2	2	2	0	0
2012-07-11	1	1-1437	2	6	1	2	2	2	2	38.8	14.8633	116	20	FALSE	FALSE	FALSE	FALSE	7.2	38.7	195	5.14	1.74	0.32	43.2	53	21	119	2	<LOD	2	2	2	0	0
2012-07-11	1	1-1438	1	13	3	2	2	2	2	38.8	17.4818	155	42	FALSE	FALSE	FALSE	FALSE	6.03	46.1	256	2.74	2.66	0.51	44.7	57	20	113	2	<LOD	2	2	2	0	0
2012-07-11	1	1-1439	2	1	3	2	2	2	2	39	20.2546	72	10.5	FALSE	FALSE	FALSE	FALSE	8.76	44.7	229	2.74	5.24	0.76	38	61	18	131	2	<LOD	2	2	2	0	0
2012-08-11	1	1-1440	2	9	3	2	2	2	2	38.9	21.4286	140	42	TRUE	FALSE	FALSE	FALSE	3.09	42.4	120	1.09	1.71	0.28	40.8	32	8	102	2	<LOD	2	2	2	0	0
2012-08-11	1	1-1441	1	5	1	2	2	2	2	39	14.876	110	18	FALSE	FALSE	FALSE	FALSE	6.35	35.4	192	4.22	1.34	0.76	44.2	40	17	158	1	4		2	2	0	0
2012-08-11	1	1-1442	2	3	1	2	2	2	2	38	10.203	99	10	FALSE	FALSE	FALSE	FALSE	22.89	37.2	488	15.88	4.11	1.67	41	42	13	71	2	<LOD	2	2	2	0	0
2012-08-11	1	1-1443	1	4	1	2	2	2	2	39	17.0441	111	21	FALSE	FALSE	FALSE	FALSE	16.11	39.5	241	11.71	3.13	1.11	45	39	15	152	2	<LOD	2	2	2	0	0
2012-08-11	1	1-1444	2	5	1	2	2	2	2	38.8	13.4657	114	17.5	FALSE	FALSE	FALSE	FALSE	5.38	34.9	234	4.09	0.75	0.53	45	36	12	124	2	<LOD	2	2	2	0	0
2012-08-11	1	1-1445	1	3	3	2	2	2	2	39	14.0566	98	13.5	FALSE	FALSE	FALSE	FALSE	4.49	37.3	110	1.49	2.78	0.21	41.4	115	121	310	1	4		2	2	0	0
2012-08-11	1	1-1446	2	10	1	1	2	2	2	39.5	21.1702	149	47	FALSE	FALSE	FALSE	FALSE	4.41	36.9	231	3.24	0.63	0.53	44.8	35	14	84	2	<LOD	2	2	2	0	0
2012-09-11	1	1-1447	2	5	2	2	2	2	2	38.8	13.8504	114	18	FALSE	FALSE	FALSE	FALSE	6.16	38.1	186	3.15	2.35	0.64	44.2	39	8	109	2	<LOD	2	2	2	0	0
2012-09-11	1	1-1448	1	1	2	2	2	2	2	38.7	21.8211	71	11	FALSE	FALSE	FALSE	FALSE	17.54	36.1	270	9.39	6.57	1.53	41.2	35	13	74	2	<LOD	2	2	2	0	2
2012-09-11	1	1-1449	1	1	2	2	2	2	2	38.6	13.7174	81	9	FALSE	FALSE	FALSE	FALSE	14.41	38.8	233	3.37	10.03	0.93	42.2	73	22	349	2	<LOD	2	2	2	0	0
2012-09-11	1	1-1450	1	2	3	2	2	2	2	38	16.7872	88	13	FALSE	FALSE	FALSE	FALSE	11.43	34.5	248	5.89	4.36	1.07	35.3	43	12	79	2	<LOD	2	2	2	0	0
2012-12-11	1	1-1451	1	11	2	2	2	2	1	38.6	15.2344	160	39	FALSE	FALSE	FALSE	FALSE	4.12	38.5	136	1.93	1.86	0.3	38.3	33	21	149	1	3		1	2	0	0
2012-12-11	1	1-1452	1	3	1	2	2	2	2	38.7	15.191	96	14	FALSE	FALSE	FALSE	FALSE	30.43	33.4	313	24.73	3.69	2	45.1	34	18	184	2	<LOD	2	2	2	0	0
2012-12-11	1	1-1453	1	3	2	2	2	2	2	38.8	18.1077	94	16	FALSE	FALSE	FALSE	FALSE	15.5	34.4	390	9.95	3.41	2.1	37	35	18	62	2	<LOD	2	2	2	0	0
2012-12-11	1	1-1454	2	7	2	2	2	2	2	38.6	12.4295	122	18.5	FALSE	FALSE	FALSE	FALSE	6.36	42.5	217	3.03	2.96	0.35	42.1	18	33	147	2	<LOD	2	2	2	0	0
2012-12-11	1	1-1455	1	1	2	2	2	2	2	38.7	14.7929	78	9	FALSE	FALSE	FALSE	FALSE	11.78	35.1	353	6.88	3.71	1.03	42.6	39	23	45	2	<LOD	2	2	2	0	2
2012-12-11	1	1-1456	2	12	1	2	2	2	2	38.8	17.3333	150	39	FALSE	FALSE	FALSE	FALSE	15.42	37.7	480	13.27	1.36	0.75	42.9	25	18	44	1	4		2	2	0	0
11/13/12 12:00 AM	1	1-1457	2	3	3	2	2	2	2	38.9	12.4491	94	11	FALSE	FALSE	FALSE	FALSE	7.69	36.7	218	3.86	3.33	0.49	42.4	34	10	145	2	<LOD	2	2	2	0	0
11/13/12 12:00 AM	1	1-1458	2	4	3	2	2	2	2	39	15.3787	102	16	FALSE	FALSE	FALSE	FALSE	4.52	38.5	64	1.19	2.92	0.38	40.5	48	11	95	1	4		1	2	0	0
11/13/12 12:00 AM	1	1-1459	2	4	1	1	1	2	2	38.7	17.438	103	18.5	FALSE	FALSE	FALSE	FALSE	13.56	39.6	193	10.67	2.05	0.83	47.5	45	17	155	2	<LOD	2	2	2	0	0
11/13/12 12:00 AM	1	1-1460	1	5	2	2	2	2	2	38.9	11.6882	117	16	FALSE	FALSE	FALSE	FALSE	6.36	37.9	198	3.33	2.54	0.49	45.7	34	11	100	2	<LOD	2	2	2	0	0
11/13/12 12:00 AM	1	1-1461	2	4	2	2	2	2	2	38.8	14.5748	108	17	FALSE	FALSE	FALSE	FALSE	8.78	39.5	309	4.6	3.92	0.25	42	51	18	95	2	<LOD	2	2	2	0	0
11/14/12 12:00 AM	1	1-1462	1	5	2	2	2	2	2	39	16.3265	105	18	FALSE	FALSE	FALSE	FALSE	5.93	39.8	309	3.55	2.11	0.25	45.6	49	17	664	2	<LOD	2	2	2	0	0
11/14/12 12:00 AM	1	1-1463	1	6	2	2	2	2	2	38.7	12.711	119	18	FALSE	FALSE	FALSE	FALSE	6.46	37.3	256	4.06	2.01	0.34	42.3	22	7	87	2	<LOD	2	2	2	0	0
11/14/12 12:00 AM	1	1-1464	2	1	2	2	2	2	2	38.9	17.3484	74	9.5	FALSE	FALSE	FALSE	FALSE	9.78	37.3	216	2.19	6.62	0.39	40.1	37	14	69	2	<LOD	2	2	2	0	0
11/14/12 12:00 AM	1	1-1465	2	10	2	2	2	2	2	38.6	20.3619	147	44	FALSE	FALSE	FALSE	FALSE	4.22	37.5	104	2.5	1.12	0.59	42.4	59	36	220	1	3		1	2	0	0
11/14/12 12:00 AM	1	1-1466	1	8	1	2	2	2	2	38.8	15.7333	131	27	FALSE	FALSE	FALSE	FALSE	10.7	37.6	278	8.58	1.59	0.42	48.7	29	11	60	2	<LOD	2	2	2	0	0
11/14/12 12:00 AM	1	1-1467	2	1	3	2	2	2	2	38.7	18.2615	74	10	FALSE	FALSE	FALSE	FALSE	14.85	27.1	537	9.76	4	1.04	41.8	35	16	128	2	<LOD	2	2	2	0	0
11/14/12 12:00 AM	1	1-1468	1	5	2	2	2	2	2	38.6	13.1944	120	19	FALSE	FALSE	FALSE	FALSE	13.11	36.6	266	9.03	2.8	1.14	42.5	36	13	99	2	<LOD	2	2	2	0	0
11/14/12 12:00 AM	1	1-1469	1	5	2	2	2	2	2	39	28.7335	115	38	FALSE	FALSE	FALSE	FALSE	9.11	39.2	157	5.04	3.39	0.65	41.1	36	14	114	2	<LOD	2	2	2	0	0
11/14/12 12:00 AM	1	1-1470	2	10	2	1	2	2	2	39	17.0898	128	28	TRUE	FALSE	FALSE	FALSE	4.08	38.5	156	2.85	0.88	0.35	43.5	65	43	102	1	4		1	2	0	0
11/14/12 12:00 AM	1	1-1471	1	2	3	1	1	2	2	39	25.1024	87	19	FALSE	FALSE	FALSE	FALSE	9.88	35.3	160	7.16	2.17	0.54	43.2	39	16	114	2	<LOD	2	2	2	0	0
11/15/12 12:00 AM	1	1-1472	2	9	3	1	1	1	1	39	16.3966	144	34	TRUE	FALSE	FALSE	FALSE	4.32	45	102	3.15	0.82	0.34	47.2	60	21	323	1	4		1	1	2	1
11/15/12 12:00 AM	1	1-1473	1	4	3	2	2	2	2	38.8	15.1467	112	19	FALSE	FALSE	FALSE	FALSE	7.6	39	188	4.56	2.48	0.53	44.5	53	14	122	1	1		1	2	0	0
11/15/12 12:00 AM	1	1-1474	2	9	2	2	2	2	2	39	17.313	114	22.5	FALSE	FALSE	FALSE	FALSE	2.41	37.8	150	1.59	0.63	0.18	42.8	42	15	78	1	1		1	2	0	0
11/15/12 12:00 AM	1	1-1475	2	11	2	1	2	2	2	38.8	12.3274	156	30	FALSE	FALSE	FALSE	FALSE	5.7	41	212	4.68	0.74	0.26	46.4	42	11	366	2	<LOD	2	2	2	0	2
11/15/12 12:00 AM	1	1-1476	2	9	3	2	2	2	2	38.7	14.0571	136	26	FALSE	FALSE	FALSE	FALSE	3.85	38.9	188	0.91	2.62	0.29	43.4	48	21	79	2	<LOD	2	2	2	0	0
11/15/12 12:00 AM	1	1-1477	1	3	2	2	2	2	2	39	16.976	94	15	FALSE	FALSE	FALSE	FALSE	8.5	35.4	280	5.26	2.34	0.65	38.4	49	7	112	2	<LOD	2	2	2	0	0
11/15/12 12:00 AM	1	1-1478	2	9	3	2	2	2	2	38.7	19.4287	138	37	TRUE	FALSE	FALSE	TRUE	8.09	37.9	249	3.8	3.8	0.4	38.5	47	22	122	2	<LOD	2	2	2	0	0
11/15/12 12:00 AM	1	1-1479	1	1	3	2	2	2	1	38.9	19.8373	71	10	FALSE	FALSE	FALSE	TRUE	8.94	31.9	303	3.08	4.81	0.92	43	56	22	71	2	<LOD	2	2	2	0	0
11/16/12 12:00 AM	1	1-1480	1	7	3	2	2	2	1	38.7	14.781	122	22	TRUE	FALSE	FALSE	FALSE	2.15	40.3	99	0.84	1.22	0.08	39.5	145	78	155	1	1		1	2	0	0
11/16/12 12:00 AM	1	1-1481	2	9	1	2	2	1	1	39	11.3538	136	21	FALSE	FALSE	FALSE	TRUE	6.14	37	214	3.69	1.53	0.9	42.9	40	15	276	1	3		1	2	0	0
11/16/12 12:00 AM	1	1-1482	2	11	3	2	2	2	2	39.1	16.4444	150	37	TRUE	FALSE	FALSE	TRUE	10.19	38.2	350	8.35	0.7	1.09	44.6	27	13	126	1	3		1	2	0	0
11/16/12 12:00 AM	1	1-1483	1	6	2	2	2	2	2	39	19.391	118	27	TRUE	FALSE	FALSE	TRUE	8.24	40.5	191	4.33	3.26	0.63	42.9	51	33	162	2	<LOD	2	2	2	0	2
11/16/12 12:00 AM	1	1-1484	2	1	3	2	2	2	2	38.7	17.8963	74	9.8	TRUE	FALSE	FALSE	TRUE	12.9	40.8	280	6.82	4.8	1.25	45.2	34	11	40	2	<LOD	2	2	2	0	0
11/16/12 12:00 AM	1	1-1485	2	5	2	2	2	1	2	39	11.1474	116	15	TRUE	FALSE	FALSE	TRUE	8.67	39	256	6.5	1.71	0.4	40	35	20	60	2	<LOD	3	2	2	0	0
11/20/12 12:00 AM	1	1-1486	1	9	3	1	2	2	2	38.9	15.451	137	29	FALSE	FALSE	FALSE	FALSE	7.03	41.3	202	2.94	3.61	0.42	46	41	22	72	2	<LOD	2	2	2	0	0
11/20/12 12:00 AM	1	1-1487	1	2	1	2	2	2	2	39	18.75	80	12	FALSE	FALSE	FALSE	FALSE	20.01	38.8	304	10.96	6.05	2.69	38.8	64	25	79	2	<LOD	2	2	2	0	0
11/20/12 12:00 AM	1	1-1488	2	3	1	2	2	2	2	39.3	16.6205	95	15	FALSE	FALSE	FALSE	FALSE	7.55	33.3	272	4.8	2.12	0.63	43.6	54	14	118	2	<LOD	2	2	2	0	0
11/20/12 12:00 AM	1	1-1489	2	7	2	2	1	2	2	39	13.4372	122	20	FALSE	FALSE	FALSE	FALSE	3.92	39.6	197	1.41	2.05	0.45	46.7	59	16	84	2	<LOD	2	2	2	0	0
11/20/12 12:00 AM	1	1-1490	2	2	2	2	2	2	2	39	12.3457	90	10	FALSE	FALSE	FALSE	FALSE	17.96	35.9	289	9.59	7.02	1.02	41.7	45	16	90	2	<LOD	2	2	2	0	0
11/20/12 12:00 AM	1	1-1491	1	12	3	2	2	2	2	39.3	19.1406	160	49	TRUE	FALSE	FALSE	FALSE	3.35	42.9	166	1.68	1.3	0.35	44.9	29	5	127	1	4		1	1	2	1
11/21/12 12:00 AM	1	1-1492	1	8	1	2	2	2	2	38.8	10.9739	135	20	FALSE	FALSE	FALSE	FALSE	10.73	37.2	223	9.55	0.81	0.35	45.9	49	23	135	2	<LOD	2	2	2	0	0
11/21/12 12:00 AM	1	1-1493	1	5	3	2	2	2	2	39.5	13.5383	107	15.5	FALSE	FALSE	FALSE	FALSE	5.69	35.2	177	3.26	2.08	0.35	39.6	42	18	90	2	<LOD	2	2	2	0	0
11/21/12 12:00 AM	1	1-1494	1	3	2	2	2	2	2	39	16.6597	98	16	FALSE	FALSE	FALSE	FALSE	9.53	31.8	313	6.1	2.31	0.73	43.5	37	15	81	2	<LOD	2	2	2	0	0
11/21/12 12:00 AM	1	1-1495	1	2	2	2	2	2	2	38.7	18.1138	91	15	FALSE	FALSE	FALSE	FALSE	11.97	35.4	331	4	7.17	0.78	41	37	15	66	2	<LOD	2	2	2	0	0
11/21/12 12:00 AM	1	1-1496	2	3	2	2	2	2	2	38.6	14.348	97	13.5	FALSE	FALSE	FALSE	FALSE	5.59	31.7	209	1.73	3.3	0.3	44.8	42	15	142	2	<LOD	2	2	2	0	0
11/21/12 12:00 AM	1	1-1497	1	6	2	2	2	2	2	38.8	15.0819	118	21	FALSE	FALSE	FALSE	FALSE	4.07	39	259	2	1.68	0.38	44.2	47	14	148	2	<LOD	2	2	2	0	0
11/21/12 12:00 AM	1	1-1498	1	4	3	2	2	2	2	38.8	13.1016	107	15	FALSE	FALSE	FALSE	FALSE	6.17	42.3	133	1.63	4.06	0.47	42.8	67	12	134	2	<LOD	2	2	2	0	0
11/22/12 12:00 AM	1	1-1499	2	5	2	2	2	1	2	39	13.7051	113	17.5	FALSE	FALSE	FALSE	FALSE	13.58	39.7	275	10.18	2.76	0.62	46.4	49	16	96	2	<LOD	2	2	2	0	0
11/22/12 12:00 AM	1	1-1500	2	2	2	1	2	2	2	38.7	17.9931	85	13	FALSE	FALSE	FALSE	FALSE	34.95	38.1	331	26.04	6.41	2.46	44.6	87	50	497	2	<LOD	2	2	2	0	0
11/22/12 12:00 AM	1	1-1501	2	2	2	2	2	2	2	39.2	15.2417	83	10.5	FALSE	FALSE	FALSE	FALSE	10.73	39.7	169	4.85	4.87	0.92	43.7	38	15	96	2	<LOD	2	2	2	0	0
11/22/12 12:00 AM	1	1-1502	1	4	2	1	1	2	2	39	12.46	106	14	FALSE	FALSE	FALSE	FALSE	6.31	36.6	286	5.18	0.91	0.22	43.7	43	7	81	2	<LOD	2	2	2	0	0
11/22/12 12:00 AM	1	1-1503	1	6	2	2	2	2	2	39.1	19.391	118	27	FALSE	FALSE	FALSE	FALSE	8.49	36.6	310	5.48	2.19	0.66	44.8	37	12	82	2	<LOD	2	2	2	0	0
11/22/12 12:00 AM	1	1-1504	2	3	2	2	2	2	2	38.8	14.6484	96	13.5	FALSE	FALSE	FALSE	FALSE	8.72	36	310	4.1	3.77	0.84	42.4	40	23	56	2	<LOD	2	2	2	0	0
11/22/12 12:00 AM	1	1-1505	2	5	3	1	2	1	1	38.7	12.8544	115	17	TRUE	FALSE	FALSE	FALSE	3.67	34.3	109	1.98	1.36	0.29	44.6	59	31	118	1	4		1	2	0	0
11/23/12 12:00 AM	1	1-1506	1	5	2	2	1	2	2	38.7	18.9036	115	25	FALSE	FALSE	FALSE	FALSE	3.13	36.3	218	1.34	1.53	0.24	44	74	43	149	1	4		2	2	0	0
11/23/12 12:00 AM	1	1-1507	2	6	2	2	1	2	2	39.5	16.1588	114	21	FALSE	FALSE	FALSE	FALSE	3.04	35.6	289	1.74	0.97	0.33	43.9	45	14	36	2	<LOD	2	2	2	0	0
11/23/12 12:00 AM	1	1-1508	1	7	1	1	2	2	2	38.8	19.5109	124	30	FALSE	FALSE	FALSE	FALSE	7.08	36.3	234	4.95	1.45	0.66	47.6	41	25	86	2	<LOD	2	2	2	0	2
11/23/12 12:00 AM	1	1-1509	2	13	2	2	2	2	2	39	20.8247	147	45	TRUE	FALSE	FALSE	FALSE	4.05	38.3	134	2.39	0.98	0.68	44.6	49	26	66	1	2		2	2	0	0
11/23/12 12:00 AM	1	1-1510	1	5	2	2	1	2	2	39	14.876	110	18	FALSE	FALSE	FALSE	FALSE	5.89	34.5	239	2.96	2.23	0.7	42.4	50	27	80	2	<LOD	2	2	2	0	0
11/23/12 12:00 AM	1	1-1511	2	4	2	2	2	2	2	38.7	14.8485	107	17	FALSE	FALSE	FALSE	FALSE	12.92	29.1	321	9.56	2.11	1.22	44	42	13	85	2	<LOD	2	2	2	0	0
11/23/12 12:00 AM	1	1-1512	1	9	3	2	1	2	2	38.7	15.3061	140	30	TRUE	FALSE	FALSE	TRUE	4.22	36.5	170	2.13	1.7	0.37	42.7	59	43	145	1	1		1	2	2	1
11/23/12 12:00 AM	1	1-1513	2	1	3	2	2	2	2	38.8	18.1787	76	10.5	TRUE	FALSE	FALSE	FALSE	13.5	31.4	243	5.26	6.98	1.25	39.1	101	103	71	2	<LOD	2	2	2	0	0
11/23/12 12:00 AM	1	1-1514	1	10	2	2	1	2	2	39	17.7458	152	41	TRUE	FALSE	FALSE	FALSE	9.08	39.5	238	7.39	0.93	0.74	44.7	35	23	99	1	1		1	2	0	0
11/26/12 12:00 AM	1	1-1515	2	5	2	2	2	2	2	39	11.8906	116	16	FALSE	FALSE	FALSE	FALSE	6.03	32.9	322	4.33	0.86	0.82	42.3	58	18	83	1	1		1	2	0	0
11/26/12 12:00 AM	1	1-1516	1	7	3	2	2	2	1	38.8	14.08	125	22	TRUE	FALSE	FALSE	TRUE	3.56	36.3	98	1.19	2.24	0.11	42.1	117	60	88	1	4		1	2	0	0
11/26/12 12:00 AM	1	1-1517	1	7	2	2	1	2	2	39	18.8964	126	30	FALSE	FALSE	FALSE	FALSE	8.53	33.8	211	7.06	1.08	0.38	43.9	32	9	141	2	<LOD	2	2	2	0	0
11/26/12 12:00 AM	1	1-1518	2	11	3	2	2	2	2	37.8	14.4676	144	30	TRUE	FALSE	FALSE	FALSE	4.7	39.7	172	3.14	1.18	0.35	45.6	39	18	85	2	<LOD	2	2	2	0	0
11/27/12 12:00 AM	1	1-1519	2	7	2	2	2	2	2	38.5	15.5	127	25	FALSE	FALSE	FALSE	FALSE	3.65	38	147	2.64	0.71	0.28	44.9	34	5	73	1	4		1	2	0	0
11/27/12 12:00 AM	1	1-1520	2	7	3	1	2	2	2	39.2	15.2778	120	22	FALSE	FALSE	FALSE	FALSE	3.3	38.4	71	1.77	1.32	0.2	42.2	420	209	56	1	4		1	2	0	0
11/27/12 12:00 AM	1	1-1521	1	3	3	2	2	2	2	38.8	16.6205	95	15	FALSE	FALSE	FALSE	FALSE	9.57	35.8	274	4.32	4.57	0.63	43.6	36	12	49	2	<LOD	2	2	2	0	0
11/27/12 12:00 AM	1	1-1522	2	9	2	2	2	2	2	38.7	13.8526	137	26	FALSE	FALSE	FALSE	FALSE	5.64	35.9	256	3.96	1.23	0.43	44.2	29	11	89	1	3		2	2	0	0
11/27/12 12:00 AM	1	1-1523	1	9	2	2	1	2	2	39	12.0713	135	22	FALSE	FALSE	FALSE	FALSE	4.98	35.5	164	3.57	1.04	0.35	47.9	46	29	119	2	<LOD	2	2	2	0	0
11/27/12 12:00 AM	1	1-1524	1	9	2	2	2	2	2	39	22.6843	115	30	FALSE	FALSE	FALSE	FALSE	5.82	40.1	364	3.36	2	0.45	49.3	25	16	96	2	<LOD	2	2	2	0	2
11/27/12 12:00 AM	1	1-1525	1	13	1	2	2	2	2	38.8	18.5078	166	51	FALSE	FALSE	FALSE	FALSE	6.92	47.1	293	3.71	2.07	0.99	49.8	20	3	126	2	<LOD	2	2	2	0	0
11/27/12 12:00 AM	1	1-1526	2	7	2	2	2	2	2	38.7	13.02	127	21	TRUE	FALSE	FALSE	FALSE	7.34	41.2	238	4.81	1.81	0.69	36	51	24	102	2	<LOD	2	2	2	0	0
11/27/12 12:00 AM	1	1-1527	1	6	1	2	2	2	2	38.8	14.5833	120	21	TRUE	FALSE	FALSE	FALSE	8.27	35	264	7.07	0.75	0.44	40.7	40	15	92	1	4		1	2	0	0
11/27/12 12:00 AM	1	1-1528	1	6	3	2	2	2	2	39	14.1233	119	20	FALSE	FALSE	FALSE	TRUE	5.37	37.8	237	1.92	2.94	0.5	42.9	52	18	130	2	<LOD	2	2	2	0	0
11/27/12 12:00 AM	1	1-1529	2	8	2	2	2	2	2	38.7	13.7741	132	24	FALSE	FALSE	FALSE	FALSE	5.22	36.5	250	3.34	1.45	0.43	46.7	39	14	123	2	<LOD	2	2	2	0	0
11/28/12 12:00 AM	1	1-1530	1	5	2	2	2	2	2	38.7	11.3422	115	15	FALSE	FALSE	FALSE	FALSE	4.81	34.7	256	2.49	1.91	0.4	42.6	56	15	113	2	<LOD	2	2	2	0	0
11/28/12 12:00 AM	1	1-1531	2	7	2	2	2	2	2	38.8	12.207	128	20	FALSE	FALSE	FALSE	FALSE	10.73	41.8	344	7.11	2.74	0.77	44.9	40	19	98	2	<LOD	2	2	2	0	0
11/28/12 12:00 AM	1	1-1532	1	4	2	2	2	2	2	38.7	17.6753	109	21	FALSE	FALSE	FALSE	FALSE	6.71	38	276	4.37	1.56	0.71	47	50	18	137	2	<LOD	2	2	2	0	0
11/28/12 12:00 AM	1	1-1533	1	11	2	2	2	2	2	38.5	19.1406	160	49	FALSE	FALSE	FALSE	FALSE	4.86	40.7	142	3.62	0.73	0.5	44.6	67	41	76	1	1		1	2	0	0
11/28/12 12:00 AM	1	1-1534	1	10	2	2	2	2	2	38.7	16	150	36	FALSE	FALSE	FALSE	FALSE	3.86	40.4	279	1.96	1.2	0.7	46.5	65	53	202	2	<LOD	2	2	2	0	2
11/29/12 12:00 AM	1	1-1535	1	5	2	1	1	2	2	39.4	17.0726	113	21.8	FALSE	FALSE	FALSE	FALSE	7.5	39.6	189	4.93	2.01	0.53	45.7	73	28	53	1	4		1	2	0	0
11/29/12 12:00 AM	1	1-1536	1	1	2	2	2	2	2	39	18.0802	78	11	FALSE	FALSE	FALSE	FALSE	12.81	34.1	298	5.85	5.46	1.4	38.3	52	58	105	2	<LOD	2	2	2	0	0
11/29/12 12:00 AM	1	1-1537	1	7	2	1	2	2	2	38.7	21.5278	120	31	FALSE	FALSE	FALSE	FALSE	5.06	43.7	209	2.6	2.12	0.31	46.3	34	18	85	2	<LOD	2	2	2	0	0
11/29/12 12:00 AM	1	1-1538	2	10	2	2	2	2	2	39	16.8887	146	36	FALSE	FALSE	FALSE	FALSE	2.28	38.3	60	1.49	0.66	0.13	36.7	53	15	101	1	4		1	2	0	0
11/29/12 12:00 AM	1	1-1539	2	5	2	2	2	2	2	38.5	18.5791	116	25	FALSE	FALSE	FALSE	FALSE	16.29	39.5	274	8.7	6	1.04	47.5	37	15	64	2	<LOD	2	2	2	0	0
11/29/12 12:00 AM	1	1-1540	2	1	3	2	2	2	2	38.5	18.0802	78	11	FALSE	FALSE	FALSE	FALSE	7.04	35.1	345	1.39	4.88	0.71	41.2	59	18	144	2	<LOD	2	2	2	0	0
11/29/12 12:00 AM	1	1-1541	1	4	3	2	1	2	2	39	12.0027	108	14	FALSE	FALSE	FALSE	FALSE	13.08	33	258	9.65	2.64	0.76	43	48	17	135	2	<LOD	2	2	2	0	0
11/30/12 12:00 AM	1	1-1542	1	7	3	2	2	2	2	38.7	13.7329	128	22.5	TRUE	FALSE	FALSE	TRUE	5.56	37.6	127	1.96	3.17	0.4	44	75	25	158	1	2		2	2	2	1
11/30/12 12:00 AM	1	1-1543	1	7	3	2	2	2	2	39	18.3105	128	30	TRUE	FALSE	FALSE	TRUE	3.88	41.2	115	1.81	1.79	0.26	44.3	177	58	171	1	1		2	2	2	1
2012-03-12	1	1-1544	2	7	1	2	2	1	2	39	12.8	125	20	FALSE	FALSE	FALSE	FALSE	7.46	36.3	192	6	0.73	0.71	44.8	55	24	96	1	1		1	2	0	0
2012-03-12	1	1-1545	2	5	2	1	2	2	2	38.7	12.0983	115	16	FALSE	FALSE	FALSE	FALSE	5.67	35	255	3.16	2.03	0.48	42.3	66	23	112	2	<LOD	2	2	2	0	0
2012-03-12	1	1-1546	1	2	2	1	1	2	2	38.7	15.8541	87	12	FALSE	FALSE	FALSE	FALSE	8.99	35.7	240	5.9	2.22	0.85	41	49	22	186	2	<LOD	2	2	2	0	0
2012-03-12	1	1-1547	2	9	3	2	2	2	1	39	20.0043	136	37	FALSE	FALSE	FALSE	FALSE	5.13	37.8	142	2.91	1.83	0.37	43.1	68	38	111	1	4		1	2	0	0
2012-03-12	1	1-1548	1	12	2	2	2	2	2	39	24.8358	158	62	TRUE	FALSE	FALSE	FALSE	3.42	44.7	92	1.08	1.29	0.35	40.9	69	85	169	1	2		2	2	2	1
2012-03-12	1	1-1549	1	1	2	2	2	2	2	37.8	19.0443	76	11	TRUE	FALSE	FALSE	FALSE	14.41	37.2	286	7.74	5.04	1.16	42	46	20	71	2	<LOD	2	2	2	0	0
2012-03-12	1	1-1550	1	6	1	2	2	2	2	39.1	16.5182	118	23	FALSE	FALSE	FALSE	FALSE	5.55	37.7	209	3.39	1.72	0.4	41.9	43	22	83	2	<LOD	2	2	2	0	0
2012-03-12	1	1-1551	2	4	2	2	1	2	2	38.7	13.2231	110	16	TRUE	FALSE	FALSE	FALSE	6.33	38.9	234	1.88	3.92	0.5	43	46	15	81	2	<LOD	2	2	2	0	0
2012-03-12	1	1-1552	1	2	2	2	2	2	2	38.7	18.1449	83	12.5	FALSE	FALSE	FALSE	FALSE	11.94	35.7	215	7.36	3.57	0.86	41.3	51	19	117	2	<LOD	2	2	2	0	2
2012-03-12	1	1-1553	2	9	3	2	2	2	2	39	15.1229	115	20	FALSE	FALSE	FALSE	FALSE	6.86	37.4	127	1.27	5.11	0.38	36.5	130	66	170	1	1		1	2	0	0
2012-03-12	1	1-1554	1	1	2	2	2	2	2	38.9	23.8319	73	12.7	FALSE	FALSE	FALSE	FALSE	4.7	38.5	113	0.8	3.32	0.46	41.2	38	27	71	2	<LOD	2	2	2	0	0
2012-04-12	1	1-1555	2	5	3	2	2	2	2	38.7	14.8633	116	20	TRUE	FALSE	TRUE	TRUE	3.94	38.3	135	1.2	2.53	0.19	43	87	49	97	1	2		1	2	0	0
2012-04-12	1	1-1556	1	9	1	2	2	2	2	40	15.2778	120	22	FALSE	FALSE	FALSE	FALSE	9.59	41.9	316	7.22	1.33	1.03	48.2	38	24	50	1	4		1	2	0	0
2012-04-12	1	1-1557	1	3	3	2	2	2	2	39	19.9446	95	18	FALSE	FALSE	FALSE	FALSE	13.41	37.4	283	10.3	2.12	0.95	38.9	40	15	44	1	<LOD	1	2	2	0	0
2012-04-12	1	1-1558	2	10	1	1	2	2	2	38.5	19.4028	148	42.5	FALSE	FALSE	FALSE	TRUE	8.44	40.7	326	6.87	0.61	0.94	50.7	38	31	97	1	4		1	2	0	0
2012-04-12	1	1-1559	1	12	3	2	2	2	1	38.8	26.1752	167	73	TRUE	FALSE	FALSE	FALSE	3.06	41.6	95	0.99	1.72	0.31	42.4	62	66	168	2	<LOD	2	2	2	0	0
2012-04-12	1	1-1560	1	7	3	2	2	2	2	38.7	15.6087	124	24	TRUE	FALSE	FALSE	FALSE	3.9	38.4	152	1.97	1.57	0.35	39.7	42	6	108	1	1		1	2	0	0
2012-04-12	1	1-1561	2	8	2	1	2	2	2	39	11.4784	132	20	TRUE	FALSE	FALSE	FALSE	2.13	36.4	128	0.97	0.99	0.16	44.8	62	27	276	1	4		1	2	0	0
2012-04-12	1	1-1562	2	1	3	1	2	2	1	39.5	21.3675	78	13	FALSE	FALSE	FALSE	FALSE	13.24	37.1	177	2.85	9.63	0.66	45	52	21	208	2	<LOD	2	2	2	0	0
2012-05-12	1	1-1563	2	2	2	2	2	2	2	38	15.5896	84	11	FALSE	FALSE	FALSE	FALSE	4.15	32.4	180	2.54	1.19	0.38	44	45	21	108	2	<LOD	2	2	2	0	0
2012-05-12	1	1-1564	1	1	2	2	2	2	2	38.6	13.4637	84	9.5	FALSE	FALSE	FALSE	FALSE	14.19	33.6	152	7.97	5.43	0.7	34.3	78	29	829	2	<LOD	2	2	2	0	0
2012-05-12	1	1-1565	2	1	2	2	2	2	2	38.8	13.2812	80	8.5	FALSE	FALSE	FALSE	FALSE	12.6	35.8	283	4.8	6.84	0.94	45.2	144	236	154	2	<LOD	2	2	2	0	0
2012-05-12	1	1-1566	2	4	2	2	2	2	2	38.8	14.5125	105	16	FALSE	FALSE	FALSE	FALSE	6.27	41.7	255	3.99	1.65	0.56	48.9	61	20	121	2	<LOD	2	2	2	0	0
2012-05-12	1	1-1567	1	6	2	2	2	2	2	37.8	19.391	118	27	TRUE	FALSE	FALSE	FALSE	15.1	35.4	350	10.25	3.68	1.08	43.7	31	15	67	2	<LOD	2	2	2	0	0
2012-05-12	1	1-1568	1	13	1	2	2	2	2	38.5	24.4352	158	61	FALSE	FALSE	FALSE	FALSE	8.06	42.3	234	6.16	0.91	0.9	46.8	25	15	105	1	4		1	2	1	1
2012-07-12	1	1-1569	1	12	2	1	2	2	2	39	20.3954	155	49	FALSE	FALSE	FALSE	FALSE	4.43	39.8	225	2.57	1.27	0.58	42.6	47	32	138	1	<LOD	1	1	2	0	0
2012-07-12	1	1-1570	2	10	2	2	1	2	2	38.9	16.8789	144	35	TRUE	FALSE	FALSE	FALSE	8.28	42.5	127	3.39	3.89	0.95	47.1	58	18	577	2	<LOD	2	2	2	0	0
2012-07-12	1	1-1571	1	14	1	2	2	2	2	38.7	19.3625	167	54	FALSE	FALSE	FALSE	FALSE	8.3	42.7	203	6.81	0.91	0.56	50.2	28	13	105	1	1		1	2	0	0
2012-07-12	1	1-1572	2	6	2	2	2	2	2	38.8	12.5	120	18	TRUE	FALSE	FALSE	FALSE	4.42	34.6	243	1.42	2.49	0.5	43.9	57	22	102	1	1		1	2	1	1
2012-07-12	1	1-1573	1	12	1	2	2	2	2	39	19.8791	157	49	FALSE	FALSE	FALSE	FALSE	4.02	39.2	290	2.2	1.41	0.38	41.2	32	18	166	1	2		2	2	0	0
2012-10-12	1	1-1574	2	3	2	2	2	2	2	38.7	14.8794	97	14	FALSE	FALSE	FALSE	FALSE	7.85	34.2	395	2.01	4.93	0.26	44.3	27	11	66	2	<LOD	2	2	2	0	0
2012-10-12	1	1-1575	1	13	3	1	2	2	2	38.6	19.2234	153	45	FALSE	FALSE	FALSE	FALSE	3.39	41.4	190	2.58	0.47	0.33	42.9	82	76	106	1	1		1	2	2	1
2012-10-12	1	1-1576	2	10	3	2	2	2	2	38.7	20.0877	148	44	FALSE	FALSE	FALSE	FALSE	2.57	41.8	73	1.06	1.18	0.28	43.7	123	57	279	1	1		1	2	0	0
2012-10-12	1	1-1577	1	14	3	2	2	2	2	38	18.8271	158	47	FALSE	FALSE	FALSE	FALSE	5.65	45.7	141	3.93	1.33	0.37	43	45	20	106	1	2		2	2	2	3
2012-10-12	1	1-1578	2	1	1	2	2	2	2	38.7	14.878	71	7.5	TRUE	FALSE	FALSE	FALSE	7.38	36.7	167	4.19	2.29	0.75	49.6	51	22	115	1	4		1	2	0	0
2012-11-12	1	1-1579	1	12	3	1	2	2	2	39.1	15.8221	157	39	FALSE	FALSE	FALSE	FALSE	4.98	41.3	215	2.65	1.73	0.5	44.9	43	21	144	2	<LOD	2	2	2	0	0
2012-11-12	1	1-1580	2	1	3	2	2	2	2	38.6	20.4444	75	11.5	FALSE	FALSE	FALSE	FALSE	39.96	26.7	470	27.59	10.4	1.36	33.7	36	19	37	2	<LOD	2	2	2	0	0
2012-11-12	1	1-1581	1	1	2	1	2	2	2	38.8	23.0112	78	14	FALSE	FALSE	FALSE	FALSE	10.55	39	133	3.52	5.74	1.22	42.7	72	36	266	1	2		2	2	0	0
2012-11-12	1	1-1582	1	3	3	2	2	2	2	39.1	23.329	96	21.5	FALSE	FALSE	FALSE	FALSE	11.66	31.8	340	5.02	5.6	1.01	45.5	67	30	283	2	<LOD	2	2	2	0	0
2012-11-12	1	1-1583	1	4	2	2	2	2	2	39	13.975	107	16	FALSE	FALSE	FALSE	FALSE	4.43	37.9	174	2.05	1.85	0.51	45.2	39	19	145	2	<LOD	2	2	2	0	0
2012-11-12	1	1-1584	2	1	2	2	2	2	2	38.9	19.2277	79	12	FALSE	FALSE	FALSE	FALSE	10.7	35.2	248	2.64	7.16	0.89	38.6	38	17	65	1	3		1	2	0	0
2012-11-12	1	1-1585	1	3	2	2	2	2	2	39	12.4948	98	12	FALSE	FALSE	FALSE	FALSE	15.21	33	293	10.95	2.95	1.31	47.8	43	20	79	2	<LOD	2	2	2	0	0
2012-12-12	1	1-1586	2	4	3	2	2	2	2	38.7	14.3086	109	17	FALSE	FALSE	FALSE	FALSE	7.45	38.8	216	4.56	2.37	0.52	42.9	41	13	62	2	<LOD	2	2	2	0	0
2012-12-12	1	1-1587	1	4	2	2	2	2	2	38.6	21.3599	106	24	FALSE	FALSE	FALSE	FALSE	23.99	37.9	285	17.44	4.08	2.46	43.5	36	23	58	2	<LOD	2	2	2	0	0
2012-12-12	1	1-1588	1	4	3	2	1	2	2	38.5	14.059	105	15.5	FALSE	FALSE	FALSE	FALSE	7.32	38.2	300	1.63	4.77	0.63	41.5	42	17	130	1	2		2	2	1	2
2012-12-12	1	1-1589	1	3	2	1	2	2	2	39	15.9422	97	15	TRUE	FALSE	FALSE	FALSE	14.42	31.7	540	10.9	2.49	0.88	46.7	36	14	77	2	<LOD	2	2	2	0	0
12/13/12 12:00 AM	1	1-1590	1	6	2	2	2	2	2	39	16.0713	117	22	FALSE	FALSE	FALSE	FALSE	4.82	37	260	1.89	2.39	0.36	40.3	46	16	134	2	<LOD	2	2	2	0	0
12/14/12 12:00 AM	1	1-1591	2	8	1	2	2	2	2	38.8	20.0872	132	35	FALSE	FALSE	FALSE	FALSE	10.59	38.3	304	7.1	2.69	0.74	43.6	28	12	92	2	<LOD	2	2	2	0	0
12/14/12 12:00 AM	1	1-1592	2	1	2	2	2	2	2	38.6	17.7778	75	10	FALSE	FALSE	FALSE	FALSE	10.2	32.7	304	4.51	4.37	1.22	43.1	40	20	191	2	<LOD	2	2	2	0	0
12/14/12 12:00 AM	1	1-1593	1	3	3	1	2	2	2	38.4	11.2233	99	11	FALSE	FALSE	FALSE	FALSE	28.03	35.5	343	24.25	2.24	1.45	43.2	32	17	53	2	<LOD	2	2	2	0	2
12/14/12 12:00 AM	1	1-1594	2	2	3	2	2	2	2	39	14.7125	94	13	TRUE	FALSE	FALSE	FALSE	23.08	36	413	16.54	4.91	1.62	44.9	48	19	119	2	<LOD	2	2	2	0	0
12/19/11 12:00 AM	15	15-0001	2	9	1	2	2	2	2	37.1	16.8032	138	32	FALSE	FALSE	FALSE	FALSE	9.1	45.2	190	8.2	0.6	0.3	46.7	32	8	99	2	<LOD	2	2	2	0	0
12/19/11 12:00 AM	15	15-0002	2	6	2	2	1	2	2	39	15.2778	120	22	FALSE	FALSE	FALSE	FALSE	8.4	40.4	340	5	2.6	0.6	44.7	49	9	113	2	<LOD	2	2	2	0	0
12/19/11 12:00 AM	15	15-0003	2	8	3	1	2	2	2	38.5	16	125	25	FALSE	FALSE	FALSE	TRUE	1.88	46.6	250	1.28	0.507	0.077	45.8	42	12	97	2	<LOD	2	2	2	0	0
12/20/11 12:00 AM	15	15-0004	2	7	1	2	1	2	2	38	16.8377	113	21.5	FALSE	FALSE	FALSE	FALSE	8.5	45.5	367	6.5	1.6	0.3	54.7	46	17	106	2	<LOD	2	2	2	0	0
12/20/11 12:00 AM	15	15-0005	2	1	1	1	2	2	2	38	16.0108	72	8.3	FALSE	FALSE	FALSE	FALSE	13.2	36.5	111	3.96	6.22	2.68	44.9	60	21	146	2	<LOD	2	2	2	0	0
12/21/11 12:00 AM	15	15-0006	1	7	1	2	2	2	2	38.7	14.72	125	23	FALSE	FALSE	FALSE	FALSE	17.8	37.4	235	15.3	1.2	1.2	42.3	45	14	110	2	<LOD	2	2	2	0	2
12/21/11 12:00 AM	15	15-0007	1	3	2	1	2	2	2	38.8	17.343	93	15	FALSE	FALSE	FALSE	FALSE	9.1	41.8	211	4.3	3.8	0.9	45.7	48	19	163	2	<LOD	2	2	2	0	0
12/21/11 12:00 AM	15	15-0008	1	5	3	2	2	2	2	37.9	15.1467	112	19	FALSE	FALSE	FALSE	FALSE	8.4	38.9	355	4.2	3.31	0.53	47.5	30	18	168	2	<LOD	2	2	2	0	0
12/22/11 12:00 AM	15	15-0009	2	2	3	2	1	2	2	37.8	10.7438	110	13	FALSE	FALSE	FALSE	FALSE	17.1	39	400	10	5.53	1.08	43.1	36	14	88	2	<LOD	2	2	2	0	0
12/22/11 12:00 AM	15	15-0010	1	4	1	1	1	2	2	38	16.1391	98	15.5	FALSE	FALSE	FALSE	FALSE	12.4	37.6	372	10.6	1.29	0.46	51.8	39	12	122	2	<LOD	2	2	2	0	0
12/22/11 12:00 AM	15	15-0011	1	4	3	1	2	2	2	37.6	14.5748	108	17	FALSE	FALSE	FALSE	FALSE	11.5	39.2	321	7.6	2.9	0.9	42.6	51	19	98	2	<LOD	2	2	2	0	0
12/22/11 12:00 AM	15	15-0012	1	4	3	2	1	2	2	39.8	15.1299	106	17	FALSE	FALSE	FALSE	FALSE	23.7	40.8	383	15.1	5.1	3.2	46.4	28	13	32	2	<LOD	2	1	2	0	2
12/22/11 12:00 AM	15	15-0013	1	5	2	2	2	2	2	39.6	14.0966	113	18	FALSE	FALSE	FALSE	FALSE	9.3	39.8	207	6.8	1.7	0.7	44	37	15	128	2	<LOD	2	2	2	0	0
12/22/11 12:00 AM	15	15-0014	1	7	3	2	2	2	2	37.7	14.0381	128	23	FALSE	FALSE	FALSE	FALSE	7.9	37	298	4	3.2	0.6	43.6	39	16	158	2	<LOD	2	2	2	0	0
12/23/11 12:00 AM	15	15-0015	2	11	2	2	2	2	2	37.5	22.2505	143	45.5	FALSE	FALSE	FALSE	FALSE	9.8	39.8	379	5.1	3.6	0.6	44.1	41	48	144	2	<LOD	2	2	2	0	2
12/23/11 12:00 AM	15	15-0016	1	3	2	2	2	2	2	37	14.4044	95	13	FALSE	FALSE	FALSE	FALSE	6.2	37.5	142	2.9	2.1	1.1	46.3	35	13	51	2	<LOD	2	2	2	0	0
12/23/11 12:00 AM	15	15-0017	1	9	1	2	2	2	2	37.8	14.492	139	28	FALSE	FALSE	FALSE	FALSE	4.2	41.5	197	2.1	1.3	0.7	49.6	56	46	146	2	<LOD	2	2	2	0	0
12/23/11 12:00 AM	15	15-0018	1	10	1	2	2	2	2	39	15.3739	142	31	FALSE	FALSE	FALSE	FALSE	7.4	36.2	255	5.8	1.2	0.4	45.3	31	19	100	2	<LOD	2	2	2	0	0
12/28/11 12:00 AM	15	15-0019	1	1	3	1	2	2	2	38	16.0037	81	10.5	FALSE	FALSE	FALSE	FALSE	17.4	32.9	372	10.5	4.32	2.44	38	45	14	52	2	<LOD	2	2	2	0	0
12/28/11 12:00 AM	15	15-0020	1	10	3	1	1	1	2	40.6	23.9796	140	47	FALSE	TRUE	FALSE	FALSE	3.5	39.1	111	2.22	0.86	0.31	38.8	123	49	180	1	2		1	1	2	1
12/29/11 12:00 AM	15	15-0021	1	6	3	1	2	2	2	38.9	13.0809	114	17	FALSE	FALSE	FALSE	FALSE	12.5	35.3	328	9.5	2.4	0.6	46.5	60	17	59	1	1		1	1	1	2
12/29/11 12:00 AM	15	15-0022	1	3	2	1	2	2	2	37.5	17.9211	93	15.5	FALSE	FALSE	FALSE	FALSE	9.8	33.5	221	7.4	1.6	0.8	45.7	43	16	123	2	<LOD	2	2	2	0	0
2012-03-01	15	15-0023	1	13	2	1	1	2	2	39	14.3353	141	28.5	FALSE	FALSE	FALSE	FALSE	4.9	41	149	3.2	1.1	0.4	46.1	31	14	77	2	<LOD	2	2	2	0	0
2012-03-01	15	15-0024	1	3	3	1	2	2	2	37.5	14.491	91	12	FALSE	FALSE	FALSE	FALSE	5.7	34.3	220	3	2	0.7	45.3	49	16	82	2	<LOD	2	2	2	0	0
2012-03-01	15	15-0025	2	6	1	2	2	2	2	38	15.4321	108	18	FALSE	FALSE	FALSE	FALSE	6.4	34.6	212	3.8	2.1	0.5	47.2	31	13	149	2	<LOD	2	2	2	0	2
2012-04-01	15	15-0026	2	9	1	2	1	2	2	37.5	17.7515	130	30	FALSE	FALSE	FALSE	FALSE	7	41.1	200	5.8	0.9	0.3	47.1	40	22	49	2	<LOD	2	1	2	0	0
2012-04-01	15	15-0027	1	8	3	1	2	2	2	38	15.2026	123	23	FALSE	FALSE	FALSE	FALSE	6.4	38.6	120	4.8	1.4	0.2	44.6	356	222	104	1	2		2	1	2	1
2012-05-01	15	15-0028	1	4	3	1	2	2	2	37.5	15	100	15	FALSE	FALSE	FALSE	FALSE	8.7	34.5	242	5.1	2.6	0.8	44.7	37	11	133	2	<LOD	2	2	2	0	0
2012-06-01	15	15-0029	2	11	1	2	2	2	2	38.2	16.3658	142	33	FALSE	FALSE	FALSE	FALSE	3.9	39.9	152	2.4	1.2	0.3	45.3	33	19	84	2	<LOD	2	2	2	0	0
2012-06-01	15	15-0030	1	2	1	1	2	1	2	39	20.8209	82	14	FALSE	FALSE	FALSE	FALSE	27.8	39.1	395	19.6	5.8	2.2	49.5	44	24	84	2	<LOD	2	2	2	0	2
2012-06-01	15	15-0031	2	9	1	1	2	2	2	38.5	16.2591	124	25	FALSE	FALSE	FALSE	FALSE	10.6	38.8	208	8.6	1.3	0.7	47.7	35	16	119	2	<LOD	2	2	2	0	0
2012-09-01	15	15-0032	1	3	3	2	2	2	2	36.6	12.6247	89	10	FALSE	FALSE	FALSE	FALSE	4.7	34.3	143	1.5	2.7	0.5	40.8	42	15	79	2	<LOD	2	2	2	0	2
2012-09-01	15	15-0033	2	3	1	1	1	2	2	39.5	14.7125	94	13	FALSE	FALSE	FALSE	FALSE	7.6	36.4	263	6.3	0.9	0.4	49.9	69	32	419	1	<LOD	2	2	1	1	1
2012-09-01	15	15-0034	1	8	1	2	2	2	2	37.2	15.4321	108	18	FALSE	FALSE	FALSE	FALSE	12.3	38.5	279	7.6	3.3	1.2	43.6	28	12	94	2	<LOD	2	2	2	0	0
2012-10-01	15	15-0035	1	4	1	2	2	2	2	37.5	14.7044	101	15	FALSE	FALSE	FALSE	FALSE	11	37.5	239	8.1	1.7	0.6	44.6	72	24	100	2	<LOD	2	2	2	0	0
2012-10-01	15	15-0036	1	6	2	2	1	2	2	37.4	13.1537	112	16.5	FALSE	FALSE	FALSE	FALSE	7.4	39.8	276	2.7	3.3	1	43.6	37	11	123	2	<LOD	2	2	2	0	0
1/30/12 12:00 AM	15	15-0037	1	3	3	2	2	2	2	37.5	14.1777	92	12	FALSE	FALSE	FALSE	FALSE	5.21	37.9	204	1.4	2.97	0.749	44.8	61	24	60	2	<LOD	2	2	2	0	0
1/30/12 12:00 AM	15	15-0038	2	10	3	2	2	2	2	38	13.5678	133	24	FALSE	FALSE	FALSE	FALSE	9	37.1	153	5.8	2.6	0.5	42.1	30	11	107	2	<LOD	2	2	2	0	2
1/31/12 12:00 AM	15	15-0039	2	2	3	1	2	2	2	39.3	15.2417	83	10.5	FALSE	FALSE	FALSE	FALSE	7.75	35.8	221	4.37	3.13	0.083	44.4	55	19	123	2	<LOD	2	2	2	0	0
1/31/12 12:00 AM	15	15-0040	1	7	2	1	1	2	2	37	19.7726	119	28	FALSE	FALSE	FALSE	FALSE	6.6	37.5	268	4.5	1.6	0.5	37.3	47	17	65	2	<LOD	2	2	2	0	0
2012-01-02	15	15-0041	1	8	3	1	1	2	2	38	13.8806	123	21	FALSE	FALSE	FALSE	FALSE	6.99	37.1	297	5.71	1.06	0.185	47.1	52	14	86	2	<LOD	2	2	2	0	2
2012-02-02	15	15-0042	2	4	3	1	2	2	2	36.9	15.9422	97	15	FALSE	FALSE	FALSE	FALSE	8.2	35.7	250	7	0.9	0.3	45.5	50	16	134	2	<LOD	2	2	2	0	2
2012-02-02	15	15-0043	1	10	1	2	2	2	2	38.4	17.28	125	27	FALSE	FALSE	FALSE	FALSE	11.2	36.9	165	8.48	1.5	0.795	45.6	36	19	92	2	<LOD	2	2	2	0	0
2012-03-02	15	15-0044	1	4	1	2	1	2	2	37.7	14.7125	94	13	FALSE	FALSE	FALSE	FALSE	10.2	34.7	309	8.2	1	0.7	45.3	42	20	102	2	<LOD	2	2	2	0	0
2012-03-02	15	15-0045	1	6	3	1	1	2	2	37	14.5748	108	17	FALSE	FALSE	FALSE	FALSE	5.2	36.8	186	2.4	2.5	0.3	47.1	52	18	89	2	<LOD	2	2	2	0	0
2012-06-02	15	15-0046	2	15	3	2	2	2	2	37.3	17.6693	156	43	FALSE	FALSE	FALSE	FALSE	2.54	37.1	144	1.08	1.23	0.217	43.6	45	20	119	1	4		2	1	2	1
2012-07-02	15	15-0047	1	1	3	2	2	2	2	37	15.2416	81	10	FALSE	FALSE	FALSE	FALSE	10.6	35.2	315	5.3	4.2	0.9	42.2	47	24	89	2	<LOD	2	2	2	0	0
2012-07-02	15	15-0048	2	1	3	2	2	2	2	39	16.1916	77	9.6	FALSE	FALSE	FALSE	FALSE	8.2	30.3	156	3.87	3.27	0.98	41.5	34	18	63	2	<LOD	2	2	2	0	0
2012-08-02	15	15-0049	2	5	3	1	1	2	2	37.1	13.1016	107	15	FALSE	FALSE	FALSE	FALSE	11.2	38.5	419	9.1	1.7	0.4	45.2	47	15	55	2	<LOD	2	2	2	0	0
2012-08-02	15	15-0050	1	5	3	1	1	2	2	38	24.8628	108	29	FALSE	FALSE	FALSE	FALSE	7.3	36.8	291	5.8	1.1	0.4	44.2	37	24	88	2	<LOD	2	2	2	0	0
2012-09-02	15	15-0051	1	7	3	2	2	2	2	37	14.3433	121	21	FALSE	FALSE	FALSE	FALSE	5.16	40.7	264	2.58	1.96	0.513	43.4	54	16	106	2	<LOD	2	2	2	0	0
2012-10-02	15	15-0052	2	6	2	2	2	2	2	38	14.3495	112	18	FALSE	FALSE	FALSE	FALSE	9.6	34.2	275	6.5	2.6	0.4	42.3	40	11	89	2	<LOD	2	2	2	0	0
2012-10-02	15	15-0053	1	5	3	1	2	2	2	37	16.1586	107	18.5	FALSE	FALSE	FALSE	FALSE	6.7	35.4	377	2.87	2.55	0.63	37.2	38	17	89	2	<LOD	2	2	2	0	0
2012-10-02	15	15-0054	1	12	2	1	2	2	2	37.2	16.8919	148	37	FALSE	FALSE	FALSE	FALSE	10.6	40.8	281	8.2	1.2	1	47.1	46	15	79	2	<LOD	2	2	2	0	0
2012-10-02	15	15-0055	1	7	3	1	2	2	2	37.7	13.7174	108	16	FALSE	FALSE	FALSE	FALSE	10.8	35.4	250	8	1.8	0.9	41.1	42	12	86	2	<LOD	2	2	2	0	2
2012-10-02	15	15-0056	1	14	1	1	2	2	2	37	13.3849	164	36	FALSE	FALSE	FALSE	FALSE	21.1	47.7	314	16.4	3.3	1.3	46.2	50	21	146	2	<LOD	2	2	2	0	2
2012-10-02	15	15-0057	1	7	1	2	2	2	2	38.6	13.8889	120	20	FALSE	FALSE	FALSE	FALSE	20.4	34.7	309	15	3	2.4	39.6	35	12	66	2	<LOD	2	2	2	0	2
2/13/12 12:00 AM	15	15-0058	2	14	3	1	1	2	2	38.5	18.369	153	43	FALSE	FALSE	FALSE	FALSE	4.3	44.4	159	2.9	1	0.4	45.7	53	17	275	1	4		2	1	2	1
2/13/12 12:00 AM	15	15-0059	1	4	3	1	1	2	2	38	18.1406	105	20	FALSE	FALSE	FALSE	FALSE	7.6	37.5	243	4.4	2.5	0.7	44.1	58	33	282	2	<LOD	2	2	2	0	0
2/14/12 12:00 AM	15	15-0060	2	5	3	2	1	2	2	37	15.4195	105	17	FALSE	FALSE	FALSE	FALSE	7.9	33.5	212	4.4	2.4	0.9	43.8	42	11	97	2	<LOD	2	2	2	0	0
2/14/12 12:00 AM	15	15-0061	1	4	2	2	2	2	2	37.5	17.2292	113	22	FALSE	FALSE	FALSE	FALSE	7.6	37.4	182	4.1	2.8	0.7	44.8	52	20	78	2	<LOD	2	2	2	0	0
2/15/12 12:00 AM	15	15-0062	1	4	2	2	2	2	2	37	14.2843	99	14	FALSE	FALSE	FALSE	FALSE	10.7	34.4	229	7.9	1.7	0.7	38.4	23	28	156	2	<LOD	2	2	2	0	0
2/15/12 12:00 AM	15	15-0063	2	6	2	1	1	2	2	37	13.8683	104	15	FALSE	FALSE	FALSE	FALSE	6.2	40.1	293	1.7	3.8	0.4	47.4	56	16	148	2	<LOD	2	2	2	0	2
2/15/12 12:00 AM	15	15-0064	1	4	3	1	1	2	2	38.3	17.1468	108	20	FALSE	FALSE	FALSE	FALSE	6.4	38.6	179	4	1.7	0.7	44	47	8	85	2	<LOD	2	2	2	0	0
2/16/12 12:00 AM	15	15-0065	1	2	3	2	2	2	2	37.2	16.609	85	12	FALSE	FALSE	FALSE	FALSE	5.9	34.6	186	0.84	4.12	0.71	40.6	54	27	126	2	<LOD	2	2	2	0	0
2/16/12 12:00 AM	15	15-0066	1	9	2	1	1	2	2	37.5	14.348	132	25	FALSE	FALSE	FALSE	FALSE	7.1	39	215	5.5	1.2	0.4	47.7	37	15	87	2	<LOD	2	2	2	0	0
2/20/12 12:00 AM	15	15-0067	2	2	3	1	2	2	2	39	16.2982	84	11.5	FALSE	FALSE	FALSE	FALSE	8.3	34.5	292	4.3	3.3	0.7	42.1	40	12	93	2	<LOD	2	2	2	0	0
2/21/12 12:00 AM	15	15-0068	1	3	2	1	2	2	2	37.6	15.6986	91	13	FALSE	FALSE	FALSE	FALSE	8.6	35.2	257	5	2.7	0.6	45.2	31	15	79	2	<LOD	2	2	2	0	0
2/21/12 12:00 AM	15	15-0069	2	4	2	2	1	2	2	37	15.2784	94	13.5	FALSE	FALSE	FALSE	FALSE	6.4	35.8	292	3.42	2.43	0.47	43.8	43	19	87	2	<LOD	2	2	2	0	0
2/21/12 12:00 AM	15	15-0070	1	15	2	2	2	2	2	39.1	16.2278	157	40	FALSE	FALSE	FALSE	FALSE	4.2	39.2	150	3.6	0.4	0.2	50.6	23	8	79	2	<LOD	2	2	2	0	0
2/22/12 12:00 AM	15	15-0071	1	4	3	2	1	2	2	37	14.2399	106	16	FALSE	FALSE	FALSE	FALSE	12	38.2	307	6.9	3.6	1.1	40.4	42	19	48	2	<LOD	2	2	2	0	0
2/22/12 12:00 AM	15	15-0072	2	9	3	1	1	2	2	37.3	15.1172	126	24	FALSE	FALSE	FALSE	FALSE	4.9	44.9	198	2.05	1.87	0.96	45.7	57	18	150	2	<LOD	2	2	2	0	0
2/23/12 12:00 AM	15	15-0073	1	3	3	2	2	2	2	37	16.1868	93	14	FALSE	FALSE	FALSE	FALSE	5.8	36.3	278	3.03	1.68	0.98	43.4	39	11	61	2	<LOD	2	2	2	0	0
2/23/12 12:00 AM	15	15-0074	1	6	3	1	1	2	2	37.3	15.2714	113	19.5	FALSE	FALSE	FALSE	FALSE	9.4	35.6	338	6.05	2.37	0.76	44.1	38	17	93	2	<LOD	2	2	2	0	2
2/23/12 12:00 AM	15	15-0075	1	3	3	2	1	2	2	38.7	18	100	18	FALSE	FALSE	FALSE	FALSE	16.2	32.9	263	10.6	4.4	1.1	40.5	34	12	63	2	<LOD	2	2	2	0	2
2/23/12 12:00 AM	15	15-0076	1	11	3	1	2	2	2	37	14.5978	136	27	FALSE	FALSE	FALSE	FALSE	3.48	36.8	212	2.62	0.383	0.234	44.6	36	8	89	2	<LOD	2	2	2	0	0
2/28/12 12:00 AM	15	15-0077	1	5	3	1	1	2	2	38.2	14.5125	105	16	FALSE	FALSE	FALSE	FALSE	11.3	36.9	254	8.3	2.6	0.4	44.4	41	13	87	2	<LOD	2	2	2	0	0
2/28/12 12:00 AM	15	15-0078	1	7	3	2	2	2	2	37	13.1944	120	19	FALSE	FALSE	FALSE	FALSE	9.9	34.8	378	6.4	2.4	1.1	44.4	31	9	64	2	<LOD	2	2	2	0	0
2/28/12 12:00 AM	15	15-0079	1	10	1	2	1	2	2	37	18.923	136	35	FALSE	FALSE	FALSE	FALSE	9.4	40	302	7.2	1.6	0.6	42.2	31	10	99	2	<LOD	2	2	2	0	0
2/29/12 12:00 AM	15	15-0080	1	6	3	2	2	2	2	38.1	14.3667	115	19	FALSE	FALSE	FALSE	FALSE	3	39.4	213	1.3	1.3	0.4	43.9	45	20	87	2	<LOD	2	2	2	0	0
2/29/12 12:00 AM	15	15-0081	1	11	1	2	1	2	2	38.3	16.4795	128	27	FALSE	FALSE	FALSE	FALSE	9.6	39.9	226	6.36	2.1	0.8	45.8	34	16	74	2	<LOD	2	2	2	0	0
2/29/12 12:00 AM	15	15-0082	2	4	1	2	1	2	2	39.2	16.1868	93	14	FALSE	FALSE	FALSE	FALSE	7.9	37.8	204	5.48	1.43	0.59	43.1	41	14	56	2	<LOD	2	2	2	0	0
2012-01-03	15	15-0083	2	7	1	1	1	2	2	37.6	12.8544	115	17	FALSE	FALSE	FALSE	FALSE	21.9	41.2	360	17.4	2.6	1.8	46.9	38	19	70	2	<LOD	2	2	2	0	2
2012-02-03	15	15-0084	2	7	3	2	2	2	2	37.2	14.5748	108	17	FALSE	FALSE	FALSE	FALSE	4.2	37.5	233	1.4	2.4	0.3	44.5	45	12	110	2	<LOD	2	2	2	0	2
2012-05-03	15	15-0085	2	13	3	1	2	1	2	40	18.662	157	46	FALSE	FALSE	FALSE	FALSE	7	40.3	190	5.5	1	0.5	42.9	26	6	61	2	<LOD	2	2	2	0	2
3/13/12 12:00 AM	15	15-0086	1	14	1	2	2	2	2	39.1	20.3954	155	49	FALSE	FALSE	FALSE	FALSE	7.7	40.3	276	5.1	1.4	0.9	44.6	31	10	82	2	<LOD	2	2	2	0	0
3/13/12 12:00 AM	15	15-0087	1	6	1	2	1	2	2	40.2	13.2888	108	15.5	FALSE	FALSE	FALSE	FALSE	6.5	36.8	303	4.5	1.18	0.71	44.2	40	8	89	2	<LOD	2	2	2	0	0
3/16/12 12:00 AM	15	15-0088	1	6	1	1	2	2	2	37.5	14.4917	116	19.5	FALSE	FALSE	FALSE	FALSE	11.6	37.4	319	10.2	1	0.4	42.9	45	10	160	2	<LOD	2	2	2	0	0
3/19/12 12:00 AM	15	15-0089	1	2	3	2	1	2	2	38.1	14.8148	90	12	FALSE	FALSE	FALSE	FALSE	7.79	38.1	137	2.8	3.67	1.14	37.5	60	14	87	2	<LOD	2	2	2	0	2
3/19/12 12:00 AM	15	15-0090	2	5	3	2	2	2	2	38.7	15.0815	103	16	FALSE	FALSE	FALSE	FALSE	9.2	39.8	207	6.8	2.1	0.3	38.2	57	17	92	2	<LOD	2	2	2	0	0
3/22/12 12:00 AM	15	15-0091	1	9	1	1	2	2	2	37.5	14.7227	129	24.5	FALSE	FALSE	FALSE	FALSE	6.1	39.5	199	4.9	1	0.2	44.5	51	17	162	2	<LOD	2	2	2	0	0
3/23/12 12:00 AM	15	15-0092	1	12	1	2	2	2	2	38.8	14.5679	131	25	FALSE	FALSE	FALSE	FALSE	6.5	40.4	171	5.7	0.6	0.2	44.4	30	10	139	2	<LOD	2	2	2	0	0
3/23/12 12:00 AM	15	15-0093	1	7	2	1	2	2	2	37.2	13.3135	113	17	FALSE	FALSE	FALSE	FALSE	8.6	36.8	313	7.3	1.1	0.2	44.6	33	14	161	2	<LOD	2	2	2	0	0
3/23/12 12:00 AM	15	15-0094	1	5	1	1	2	2	2	38	16.4606	122	24.5	FALSE	FALSE	FALSE	FALSE	6.9	40.2	333	4.9	1.4	0.4	50.3	31	13	86	2	<LOD	2	2	2	0	2
3/26/12 12:00 AM	15	15-0095	1	4	2	2	2	2	2	38	17.1803	98	16.5	FALSE	FALSE	FALSE	FALSE	14	35.5	208	9.3	2.6	2	43	26	31	102	2	<LOD	2	2	2	0	0
3/26/12 12:00 AM	15	15-0096	2	7	3	2	2	2	2	38.8	14.781	122	22	FALSE	FALSE	FALSE	FALSE	3.8	38.4	174	1.4	1.9	0.5	44.2	54	19	127	1	4		1	1	2	1
3/26/12 12:00 AM	15	15-0097	1	15	2	2	2	2	2	38.9	15.9875	164	43	FALSE	FALSE	FALSE	FALSE	9.17	42.6	224	5.8	2.48	0.821	42.9	37	10	83	2	<LOD	2	2	2	0	0
3/27/12 12:00 AM	15	15-0098	1	9	1	2	2	2	2	37.3	19.2044	135	35	FALSE	FALSE	FALSE	FALSE	9.1	40.5	300	5.9	2.6	0.6	43.2	44	11	117	2	<LOD	2	2	2	0	0
3/27/12 12:00 AM	15	15-0099	1	7	1	2	2	2	2	39.3	13.8798	117	19	FALSE	FALSE	FALSE	FALSE	15.1	40.5	329	13.2	1.4	0.5	43.9	57	11	107	2	<LOD	2	2	2	0	0
3/28/12 12:00 AM	15	15-0100	1	10	3	2	2	2	2	38	20.1183	130	34	FALSE	FALSE	FALSE	FALSE	7.75	38.3	192	6.33	0.847	0.495	42	58	34	98	2	<LOD	2	2	2	0	2
3/28/12 12:00 AM	15	15-0101	1	7	3	2	2	2	2	37.5	14.5416	123	22	FALSE	FALSE	FALSE	FALSE	4.6	37.6	191	1.8	2.1	0.6	42.7	67	37	136	2	<LOD	2	2	2	0	0
3/28/12 12:00 AM	15	15-0102	1	8	1	2	2	2	2	39.7	12.9273	118	18	FALSE	FALSE	FALSE	FALSE	11	35.5	286	8.3	1.7	1	43.9	48	13	93	2	<LOD	2	2	2	0	0
2012-04-04	15	15-0103	2	2	2	1	2	2	2	38	18.8093	74	10.3	FALSE	FALSE	FALSE	FALSE	24.7	39.9	258	14.8	6.8	2.4	41	53	15	102	2	<LOD	2	2	2	0	2
2012-04-04	15	15-0104	2	10	1	2	2	2	2	38.8	17.5974	139	34	FALSE	FALSE	FALSE	FALSE	18.4	43	389	18.4	2.3	1.1	44.5	19	8	75	2	<LOD	2	2	2	0	0
2012-04-04	15	15-0105	2	6	3	2	2	2	2	39.3	13.7174	108	16	FALSE	FALSE	FALSE	FALSE	7	41.6	222	4.8	1.7	0.4	48.8	46	14	200	2	<LOD	2	2	2	0	0
2012-05-04	15	15-0106	2	9	3	2	1	2	2	38.7	17.0898	128	28	FALSE	FALSE	FALSE	FALSE	3.6	41.3	238	2.1	1.1	0.4	44.2	37	14	70	2	<LOD	2	2	2	0	2
2012-05-04	15	15-0107	2	9	1	1	2	2	2	38.1	15.6241	129	26	FALSE	FALSE	FALSE	FALSE	7.6	41.7	204	6	1.3	0.3	46.5	47	12	94	2	<LOD	2	2	2	0	0
2012-06-04	15	15-0108	1	15	3	2	2	2	1	37	21.1389	174	64	FALSE	FALSE	TRUE	FALSE	3.8	46.8	128	1.6	1.7	0.4	44.2	37	20	160	1	4		2	2	0	0
2012-06-04	15	15-0109	1	6	1	2	2	2	2	38.6	15.2893	110	18.5	FALSE	FALSE	FALSE	FALSE	19.9	38.5	252	13.6	4	1.3	43	39	18	79	2	<LOD	2	2	2	0	0
2012-09-04	15	15-0110	2	8	1	1	2	2	2	37.5	12.9773	121	19	FALSE	FALSE	FALSE	FALSE	9.7	43.4	311	8.31	1.33	0.019	44.5	26	33	74	2	<LOD	2	2	2	0	0
2012-09-04	15	15-0111	2	13	3	2	2	2	1	37.6	18.369	153	43	FALSE	FALSE	FALSE	TRUE	4.3	36.4	123	2.5	1.5	0.3	41.1	40	15	140	1	4		2	1	2	1
2012-10-04	15	15-0112	1	11	3	2	2	2	2	37.5	13.6048	146	29	FALSE	FALSE	FALSE	FALSE	8.8	40.1	212	6.9	1.3	0.4	39.8	34	1	78	2	<LOD	2	2	2	0	0
2012-11-04	15	15-0113	1	5	3	2	1	2	2	38	15.3894	114	20	FALSE	FALSE	FALSE	FALSE	4.6	39.2	152	1.8	2.2	0.5	42.1	56	8	172	1	4		2	1	2	1
2012-12-04	15	15-0114	1	5	3	1	2	2	2	39.8	17.3554	110	21	FALSE	FALSE	FALSE	FALSE	5.9	39.6	258	4.5	0.9	0.5	46.1	46	6	75	2	<LOD	2	2	2	0	0
4/13/12 12:00 AM	15	15-0115	2	11	3	2	2	2	2	38.8	20.2546	144	42	FALSE	FALSE	FALSE	FALSE	8.8	36.8	219	6.4	1.8	0.6	38	34	8	140	2	<LOD	2	2	2	0	0
4/13/12 12:00 AM	15	15-0116	2	9	3	1	2	2	2	38.4	14.08	125	22	FALSE	FALSE	FALSE	FALSE	4.5	39.8	210	2.6	1	0.8	45.4	50	15	110	1	<LOD	2	2	1	1	1
4/17/12 12:00 AM	15	15-0117	1	8	3	1	2	2	2	39.6	14.2661	135	26	TRUE	FALSE	FALSE	FALSE	3.9	36.7	115	2.4	1.2	0.3	39.5	108	29	168	1	4		1	1	2	1
4/17/12 12:00 AM	15	15-0118	1	7	1	2	2	2	2	38.2	21.7	127	35	FALSE	FALSE	FALSE	FALSE	10.7	40.7	278	8.7	1.2	0.8	39.8	56	16	137	2	<LOD	2	2	2	0	0
4/18/12 12:00 AM	15	15-0119	1	10	2	1	2	2	2	39.3	13.8526	137	26	FALSE	FALSE	FALSE	FALSE	10.1	36.3	165	7.6	1.39	1.05	46.1	83	47	115	2	<LOD	2	2	2	0	0
4/20/12 12:00 AM	15	15-0120	1	10	3	2	2	2	2	38.3	12.7219	130	21.5	FALSE	FALSE	FALSE	FALSE	7.1	37.7	249	4.9	1.8	0.4	40.9	40	9	67	2	<LOD	2	2	2	0	0
4/25/12 12:00 AM	15	15-0121	1	4	1	2	2	2	2	39.1	15	100	15	FALSE	FALSE	FALSE	TRUE	8.02	39.6	274	3.74	3.32	0.337	45.3	67	26	133	2	<LOD	2	2	2	0	0
4/26/12 12:00 AM	15	15-0122	2	2	3	2	2	2	2	38.3	16.0231	79	10	FALSE	FALSE	FALSE	FALSE	10.2	38.4	257	2.7	6.6	0.8	41.5	60	14	131	2	<LOD	2	2	2	0	0
4/26/12 12:00 AM	15	15-0123	2	11	2	1	2	2	2	38.4	13.4025	131	23	FALSE	FALSE	FALSE	FALSE	5.4	40.5	185	4.4	0.8	0.2	46.8	42	3	70	1	<LOD	1	1	2	0	0
2012-03-05	15	15-0124	1	5	2	1	1	2	2	39.4	16.7181	108	19.5	FALSE	FALSE	FALSE	FALSE	4	40.9	163	3.07	0.914	0.014	45.4	82	30	327	1	4		1	1	2	1
2012-03-05	15	15-0125	2	7	1	2	2	2	2	40.2	13.2325	115	17.5	FALSE	FALSE	FALSE	FALSE	8	40.3	174	6.2	1	0.7	47.5	43	12	90	2	<LOD	2	2	2	0	0
2012-04-05	15	15-0126	2	5	1	1	2	2	2	38.1	13.4564	102	14	FALSE	FALSE	FALSE	FALSE	20.9	39.2	405	19.1	1.72	0.023	48.5	38	20	39	2	<LOD	2	2	2	0	2
2012-07-05	15	15-0127	1	10	2	2	1	2	2	38	21.9479	135	40	FALSE	FALSE	FALSE	FALSE	4.8	40.7	247	2.7	1.3	0.8	47.9	38	16	71	2	<LOD	2	2	2	0	0
2012-07-05	15	15-0128	1	10	2	2	2	2	2	38.4	14.6484	128	24	FALSE	FALSE	FALSE	FALSE	7.1	37.2	248	5.3	1.5	0.3	37.1	37	12	113	2	<LOD	2	2	2	0	0
2012-08-05	15	15-0129	2	3	2	2	2	2	2	38.1	13.8166	97	13	FALSE	FALSE	FALSE	FALSE	8.7	37.1	209	4.5	3.7	0.5	42.2	49	8	114	2	<LOD	2	2	2	0	0
2012-08-05	15	15-0130	1	4	1	1	2	2	2	38.5	15	100	15	FALSE	FALSE	FALSE	FALSE	29.5	41.4	371	22.9	3.4	3	47.1	46	10	122	2	<LOD	2	2	2	0	2
2012-08-05	15	15-0131	1	11	3	1	2	2	2	38.3	15.7651	149	35	FALSE	FALSE	FALSE	FALSE	5.1	40.8	197	3.1	1.5	0.4	46.9	26	20	131	2	<LOD	2	2	2	0	0
2012-08-05	15	15-0132	1	11	1	1	2	2	2	37	15.2588	128	25	FALSE	FALSE	FALSE	FALSE	9.4	39.3	316	6.7	2	0.5	47.7	28	5	93	2	<LOD	2	2	2	0	0
2012-09-05	15	15-0133	1	5	1	2	2	2	2	38.2	14.7684	92	12.5	FALSE	FALSE	FALSE	FALSE	9.1	33.4	208	6.7	1.4	0.9	44.7	42	9	87	2	<LOD	2	2	2	0	0
2012-09-05	15	15-0134	1	8	2	2	2	2	2	38	14.08	125	22	FALSE	FALSE	FALSE	FALSE	6.3	40.9	196	4.1	1.5	0.7	42.1	41	14	127	2	<LOD	2	2	2	0	0
2012-09-05	15	15-0135	1	7	3	2	2	2	2	39.1	13.5501	123	20.5	FALSE	FALSE	FALSE	FALSE	13.2	41	322	10.3	1	1.9	44.1	39	15	68	1	4		1	1	2	1
2012-10-05	15	15-0136	2	7	1	1	1	2	2	37	13.4657	114	17.5	FALSE	FALSE	FALSE	FALSE	8.54	34.5	250	7.62	0.364	0.397	43.3	47	11	141	2	<LOD	2	2	2	0	0
2012-10-05	15	15-0137	2	3	1	2	2	2	2	38.5	13.5634	96	12.5	FALSE	FALSE	FALSE	FALSE	7.7	34.7	280	3.66	2.88	1.04	43.4	54	15	66	2	<LOD	2	2	2	0	2
2012-11-05	15	15-0138	2	10	3	2	2	2	2	40.2	13.7755	140	27	TRUE	FALSE	FALSE	FALSE	3.8	38.9	182	2.6	0.8	0.4	40.5	35	13	65	1	4		1	1	2	1
5/14/12 12:00 AM	15	15-0139	1	6	1	2	2	2	2	38.4	13.1519	105	14.5	FALSE	FALSE	FALSE	FALSE	5	31.7	190	3.2	1.5	0.3	41.7	50	8	91	2	<LOD	2	2	2	0	0
5/17/12 12:00 AM	15	15-0140	1	8	1	2	1	2	2	39.3	15.1172	126	24	FALSE	FALSE	FALSE	FALSE	10	41.3	141	9	0.7	0.3	45.1	45	25	112	1	4		1	1	2	1
5/17/12 12:00 AM	15	15-0141	1	5	1	2	2	2	2	39	11.52	125	18	FALSE	FALSE	FALSE	FALSE	14.4	38.1	330	9.3	3.7	1.2	44.8	44	18	103	2	<LOD	2	2	2	0	0
5/18/12 12:00 AM	15	15-0142	1	10	3	2	2	2	2	38	17.3469	140	34	FALSE	FALSE	FALSE	FALSE	5.84	37.4	257	3.82	1.7	0.253	43.9	32	14	79	2	<LOD	2	2	2	0	0
5/21/12 12:00 AM	15	15-0143	1	11	2	2	2	2	2	38.8	17.4818	155	42	FALSE	FALSE	FALSE	FALSE	5.9	42.5	252	2.2	2.3	1.2	47.2	35	9	179	2	<LOD	2	2	2	0	2
5/21/12 12:00 AM	15	15-0144	2	10	3	2	2	2	2	37.8	12.8091	134	23	FALSE	FALSE	FALSE	FALSE	5.9	40.3	199	3.6	1.8	0.4	45.3	48	10	132	2	<LOD	2	2	2	0	0
5/21/12 12:00 AM	15	15-0145	1	14	2	2	2	2	2	37.8	14.8721	164	40	FALSE	FALSE	FALSE	FALSE	4.6	42.1	197	1.7	1.9	0.9	43.2	42	16	154	1	2		1	2	0	0
5/22/12 12:00 AM	15	15-0146	2	3	3	1	2	2	2	39	16.0494	90	13	FALSE	FALSE	FALSE	FALSE	3.36	39.6	157	2.58	0.733	0.015	42.7	65	19	198	2	<LOD	2	2	2	0	2
5/23/12 12:00 AM	15	15-0147	2	9	3	1	2	2	2	38.9	14.7227	129	24.5	FALSE	FALSE	FALSE	FALSE	5.32	39.8	217	4.05	1.25	0.011	44.3	45	16	104	2	<LOD	2	2	2	0	0
5/24/12 12:00 AM	15	15-0148	2	14	3	2	2	2	2	37.5	15.625	160	40	FALSE	FALSE	FALSE	FALSE	2.6	36.7	183	1.35	0.91	0.25	47.2	52	20	187	2	<LOD	2	2	2	0	0
5/24/12 12:00 AM	15	15-0149	2	11	3	2	1	2	2	39.4	15.6379	135	28.5	FALSE	FALSE	FALSE	FALSE	2.8	38.2	148	1.7	1	0.1	41.9	45	7	106	1	1		1	1	2	1
5/25/12 12:00 AM	15	15-0150	2	3	2	1	1	2	2	38	14.348	97	13.5	FALSE	FALSE	FALSE	FALSE	4.6	38.2	95	1.5	2.4	0.6	41.8	85	49	114	2	<LOD	2	2	2	0	2
5/25/12 12:00 AM	15	15-0151	2	11	3	2	1	2	2	39	17.6693	156	43	TRUE	FALSE	FALSE	FALSE	2.2	37.1	127	1.3	0.58	0.22	41.3	75	18	84	2	<LOD	2	2	2	0	1
5/29/12 12:00 AM	15	15-0152	2	12	2	2	1	2	2	38	15.753	138	30	FALSE	FALSE	FALSE	FALSE	3.2	40.6	144	1.5	1.1	0.5	39.6	70	24	157	1	1		1	1	2	1
5/31/12 12:00 AM	15	15-0153	1	3	3	1	2	2	2	39.6	11.1595	97	10.5	FALSE	FALSE	FALSE	FALSE	23.2	36.9	262	15.1	6.4	1.7	41.6	39	12	76	2	<LOD	2	2	2	0	2
2012-01-06	15	15-0154	1	11	2	2	2	2	2	38	15.1384	136	28	FALSE	FALSE	FALSE	FALSE	7	43.6	223	3.8	2.4	0.7	42.5	48	19	105	2	<LOD	2	2	2	0	0
2012-01-06	15	15-0155	1	4	2	1	2	2	2	39.5	15	100	15	FALSE	FALSE	FALSE	FALSE	4.02	39.1	169	2.79	1.19	0.008	43.5	43	12	123	2	<LOD	2	2	2	0	0
2012-04-06	15	15-0156	2	8	3	1	1	2	2	37.5	20.8505	135	38	TRUE	FALSE	FALSE	FALSE	3.5	40.7	59	2.6	0.7	0.1	38.9	47	36	122	1	4		1	1	2	1
2012-05-06	15	15-0157	1	13	2	2	2	2	2	38.8	14.6355	159	37	FALSE	FALSE	FALSE	FALSE	19.5	41.3	217	17.3	1	0.8	40.3	30	9	86	2	<LOD	2	2	2	0	2
2012-06-06	15	15-0158	1	4	3	1	2	2	2	38.3	13.1519	105	14.5	FALSE	FALSE	FALSE	FALSE	4	34.9	223	1.6	1.9	0.4	41.4	42	15	71	2	<LOD	2	2	2	0	0
2012-06-06	15	15-0159	1	5	2	1	2	2	2	38.1	11.1111	120	16	FALSE	FALSE	FALSE	FALSE	5.32	39.1	204	4.55	0.751	0.012	45.1	48	16	179	2	<LOD	2	2	2	0	0
2012-08-06	15	15-0160	2	4	3	2	2	2	2	37	14.2399	106	16	FALSE	FALSE	FALSE	FALSE	5.4	40.1	135	1.6	3.4	0.4	40.6	44	14	120	2	<LOD	2	2	2	0	0
2012-11-06	15	15-0161	1	10	3	2	1	2	2	39.8	21.0856	136	39	FALSE	FALSE	FALSE	FALSE	3.6	44.5	105	2	0.9	0.6	43.8	155	185	105	1	4		1	1	2	1
2012-12-06	15	15-0162	1	13	2	1	2	2	2	38.2	15.5928	141	31	FALSE	FALSE	FALSE	FALSE	9.3	41.3	190	7.3	1.4	0.6	47.3	31	11	80	2	<LOD	2	2	2	0	0
6/13/12 12:00 AM	15	15-0163	1	12	2	2	2	2	2	38	16.9597	133	30	FALSE	FALSE	FALSE	FALSE	7.8	41.8	203	4.2	2.1	1.4	46.8	56	42	98	2	<LOD	2	2	2	0	0
6/14/12 12:00 AM	15	15-0164	1	15	2	1	2	2	2	38.5	17.2111	167	48	FALSE	FALSE	FALSE	FALSE	6.4	46.5	154	5.3	0.4	0.7	40.6	30	21	96	2	<LOD	2	2	2	0	0
6/14/12 12:00 AM	15	15-0165	2	4	1	2	2	2	2	39.5	13.536	98	13	FALSE	FALSE	FALSE	FALSE	12.4	37.3	202	10.1	1.6	0.7	41.5	18	26	74	2	<LOD	2	2	2	0	0
6/14/12 12:00 AM	15	15-0166	1	5	2	1	2	2	2	38	12.2537	101	12.5	FALSE	FALSE	FALSE	FALSE	5.6	34	320	3.64	1.33	0.47	43.2	45	12	79	2	<LOD	2	2	2	0	0
6/15/12 12:00 AM	15	15-0167	2	11	2	2	2	2	2	39.4	15.9144	144	33	FALSE	FALSE	FALSE	FALSE	3	42.6	256	1.31	1.18	0.5	42.7	39	13	106	2	<LOD	2	2	2	0	2
6/15/12 12:00 AM	15	15-0168	2	4	2	2	2	2	2	39	13.2964	95	12	FALSE	FALSE	FALSE	FALSE	8.5	36.9	155	5	2.6	0.9	35	97	67	243	2	<LOD	2	2	2	0	0
6/18/12 12:00 AM	15	15-0169	1	13	2	2	2	2	2	38	14.2857	140	28	FALSE	FALSE	FALSE	FALSE	3.8	43	188	1.8	1.3	0.6	42.6	46	17	118	2	<LOD	2	2	2	0	2
6/18/12 12:00 AM	15	15-0170	1	13	3	2	2	2	2	38.5	13.5031	144	28	FALSE	FALSE	FALSE	FALSE	5.7	43.4	180	4.53	0.54	0.53	43.6	51	19	138	2	<LOD	2	2	2	0	2
6/19/12 12:00 AM	15	15-0171	1	14	3	1	2	2	2	39.3	15.2038	156	37	FALSE	FALSE	FALSE	FALSE	2.4	42.8	93	1.72	0.41	0.2	36.7	53	21	102	1	4		1	1	2	1
6/19/12 12:00 AM	15	15-0172	1	11	3	2	2	2	2	38	15.753	138	30	FALSE	FALSE	FALSE	FALSE	7.9	39.9	206	5.86	1.27	0.66	40.1	35	9	86	2	<LOD	2	2	2	0	0
6/19/12 12:00 AM	15	15-0173	2	14	3	2	2	2	2	37.8	17.4638	156	42.5	FALSE	FALSE	FALSE	FALSE	3.5	40.4	244	1.26	1.58	0.52	40.6	32	12	88	2	<LOD	2	2	2	0	0
6/21/12 12:00 AM	15	15-0174	1	9	3	1	2	2	2	38	15.2026	123	23	FALSE	FALSE	FALSE	FALSE	3.4	40.2	135	1.7	1.4	0.3	41.9	58	20	92	1	4		1	1	2	1
6/22/12 12:00 AM	15	15-0175	1	8	1	2	2	2	2	38.7	14.6484	128	24	FALSE	FALSE	FALSE	FALSE	9.83	35.7	304	6.37	2.88	0.389	42	53	22	101	1	2		2	2	0	0
6/22/12 12:00 AM	15	15-0176	1	12	1	2	2	2	2	38	18.0535	157	44.5	FALSE	FALSE	FALSE	FALSE	5.68	43.8	190	4.79	0.87	0.006	44.8	44	16	104	2	<LOD	2	2	2	0	0
6/25/12 12:00 AM	15	15-0177	1	11	2	2	2	2	2	38	16.0714	140	31.5	FALSE	FALSE	FALSE	FALSE	6.8	41.9	209	4.7	1.7	0.4	41.1	107	53	113	2	<LOD	2	2	2	0	0
6/27/12 12:00 AM	15	15-0178	1	5	1	2	2	2	2	38.5	18.517	109	22	FALSE	FALSE	FALSE	FALSE	8.1	39.2	208	6.7	0.7	0.7	46.8	43	13	92	2	<LOD	2	2	2	0	0
6/29/12 12:00 AM	15	15-0179	2	6	3	2	2	2	2	39.2	15.6064	116	21	FALSE	FALSE	FALSE	FALSE	3.2	38.6	74	2.1	0.9	0.2	42.5	92	15	218	1	4		1	1	2	1
6/29/12 12:00 AM	15	15-0180	2	11	2	1	2	2	2	38	13.9229	134	25	FALSE	FALSE	FALSE	FALSE	3.7	43.5	148	2	1.2	0.5	46.9	40	12	86	2	<LOD	2	2	2	0	2
2012-02-07	15	15-0181	1	9	3	2	2	2	2	38	14.9219	132	26	FALSE	FALSE	FALSE	FALSE	5.4	39.8	198	2.8	2.3	0.3	42.6	58	29	107	2	<LOD	2	2	2	0	0
2012-04-07	15	15-0182	1	13	1	1	2	2	2	38.4	14.1527	148	31	FALSE	FALSE	FALSE	FALSE	7.2	42	235	5.54	0.98	0.42	49.6	45	20	263	2	<LOD	2	2	2	0	0
2012-04-07	15	15-0183	2	10	2	2	2	2	2	38	22.6659	144	47	FALSE	FALSE	FALSE	FALSE	6.6	39.9	237	4.7	1.2	0.7	44.2	45	38	77	1	4		1	2	0	0
2012-05-07	15	15-0184	2	1	3	2	2	2	2	38.1	15.7628	73	8.4	FALSE	FALSE	FALSE	FALSE	11.8	34.6	279	7.1	3.4	1.1	39.9	56	16	130	2	<LOD	2	2	2	0	0
2012-05-07	15	15-0185	2	6	3	1	2	2	2	38	13.6054	105	15	FALSE	FALSE	FALSE	FALSE	3.5	36.8	172	2.7	0.5	0.3	39.4	47	15	115	1	2		1	1	2	1
2012-05-07	15	15-0186	2	4	2	2	2	2	2	39.2	15.0815	103	16	FALSE	FALSE	FALSE	FALSE	8	33.6	224	4.7	2.6	0.7	39.3	41	10	61	2	<LOD	2	2	2	0	0
2012-05-07	15	15-0187	1	8	3	2	2	2	2	38.5	16.8018	117	23	FALSE	FALSE	FALSE	FALSE	9.6	34.8	162	6.8	1.5	1.1	37.1	39	12	114	2	<LOD	2	2	2	0	0
2012-06-07	15	15-0188	1	8	3	1	2	2	2	39.6	14.8721	123	22.5	TRUE	FALSE	FALSE	FALSE	3	37.5	115	2.4	0.5	0.1	40.1	93	21	124	1	1		1	1	2	1
2012-06-07	15	15-0189	2	11	3	2	2	2	2	40	14.5065	145	30.5	FALSE	FALSE	FALSE	FALSE	5.1	39.6	76	2.2	1.5	1.3	40.9	110	38	99	2	<LOD	2	2	2	0	1
2012-09-07	15	15-0190	2	12	2	2	2	2	2	37.8	15.2344	160	39	FALSE	FALSE	FALSE	FALSE	3.7	37.5	213	2.6	0.6	0.5	41.4	48	34	95	1	4		1	2	0	0
2012-10-07	15	15-0191	2	7	1	2	2	2	2	37.4	15.0263	121	22	FALSE	FALSE	FALSE	FALSE	6.7	37.5	217	4.1	1.8	0.8	43.1	32	17	65	2	<LOD	2	2	2	0	0
2012-11-07	15	15-0192	2	11	2	2	2	2	2	38.5	16.0958	141	32	FALSE	FALSE	FALSE	FALSE	6.73	37	142	5.02	1.46	0.08	44.4	30	14	155	2	<LOD	2	2	2	0	2
2012-11-07	15	15-0193	1	15	1	2	2	2	2	38	14.4138	149	32	FALSE	FALSE	FALSE	FALSE	6.37	41.9	289	5.21	0.756	0.096	42	37	13	293	2	<LOD	2	2	2	0	0
2012-12-07	15	15-0194	1	6	2	1	2	2	2	37	14.8633	116	20	FALSE	FALSE	FALSE	FALSE	10.8	37.9	307	7.9	2.1	0.8	43.7	40	19	128	2	<LOD	2	2	2	0	0
2012-12-07	15	15-0195	1	9	2	2	2	2	2	37.5	12.9273	118	18	FALSE	FALSE	FALSE	FALSE	4.9	41	124	2.7	1.9	0.3	41.9	70	36	83	2	<LOD	2	2	2	0	2
2012-12-07	15	15-0196	1	4	1	2	2	2	2	38.8	13.8166	97	13	FALSE	FALSE	FALSE	FALSE	9.7	37.7	179	8	0.8	0.9	44.6	45	13	86	2	<LOD	2	2	2	0	0
7/13/12 12:00 AM	15	15-0197	2	4	3	2	2	2	2	38	13.9369	102	14.5	FALSE	FALSE	FALSE	FALSE	8.9	37.1	250	6.2	2	0.7	38.5	38	11	199	2	<LOD	2	2	2	0	0
7/13/12 12:00 AM	15	15-0198	2	4	2	2	2	2	2	38	14.1389	103	15	FALSE	FALSE	FALSE	FALSE	6.17	40	274	3.75	2.35	0.011	42.9	43	12	87	2	<LOD	2	2	2	0	0
7/13/12 12:00 AM	15	15-0199	1	14	3	2	2	2	2	39.1	16.8847	145	35.5	FALSE	FALSE	FALSE	FALSE	9.2	42.7	251	6.9	1.1	0.7	40.5	32	14	107	2	<LOD	2	2	2	0	0
7/16/12 12:00 AM	15	15-0200	1	11	3	2	2	2	2	38	13.8526	137	26	FALSE	FALSE	FALSE	FALSE	5.1	41.7	212	4	0.7	0.4	42.9	38	14	91	2	<LOD	2	2	2	0	0
7/16/12 12:00 AM	15	15-0201	1	9	2	2	2	2	2	38.4	13.76	125	21.5	FALSE	FALSE	FALSE	FALSE	4.6	36.9	217	2.3	1.9	0.4	44.2	55	16	119	2	<LOD	2	2	2	0	2
7/17/12 12:00 AM	15	15-0202	2	11	2	1	2	2	2	38.5	14.8148	135	27	FALSE	FALSE	FALSE	FALSE	4.5	41.5	167	3.8	0.4	0.3	42.8	45	20	141	1	4		1	1	2	1
7/19/12 12:00 AM	15	15-0203	1	12	3	2	2	2	2	38.8	22.0317	158	55	FALSE	FALSE	FALSE	FALSE	11.7	38.8	247	9.5	1.5	0.5	44.4	36	22	133	2	<LOD	2	2	2	0	0
7/19/12 12:00 AM	15	15-0204	2	10	3	2	2	2	2	38.3	13.366	134	24	FALSE	FALSE	FALSE	FALSE	10.6	40.6	257	8.3	1.6	0.7	46.1	38	11	128	2	<LOD	2	2	2	0	0
7/19/12 12:00 AM	15	15-0205	2	8	2	2	2	2	2	37.8	11.52	125	18	FALSE	FALSE	FALSE	FALSE	15.7	38.1	272	12.8	2	0.9	44.7	132	59	65	2	<LOD	2	2	2	0	0
7/20/12 12:00 AM	15	15-0206	2	12	2	2	2	2	2	38.4	16.8889	150	38	FALSE	FALSE	FALSE	FALSE	9.3	45.8	186	7	1.8	0.5	46.5	46	16	162	2	<LOD	2	2	2	0	0
7/20/12 12:00 AM	15	15-0207	2	7	3	1	2	2	2	38.8	15.7025	110	19	FALSE	FALSE	FALSE	FALSE	23.7	35.2	314	21.7	1.4	0.5	38.2	50	19	129	2	<LOD	2	2	2	0	2
7/24/12 12:00 AM	15	15-0208	1	7	3	2	2	2	2	37.7	16.2418	119	23	FALSE	FALSE	FALSE	FALSE	9.9	38.5	324	7	2.1	0.7	39.2	60	54	92	2	<LOD	2	2	2	0	0
7/24/12 12:00 AM	15	15-0209	2	14	3	2	2	2	2	38.1	17.0656	155	41	FALSE	FALSE	FALSE	FALSE	3.8	39.2	151	2.7	0.8	0.3	45.7	37	23	156	2	<LOD	2	2	2	0	0
7/24/12 12:00 AM	15	15-0210	1	5	3	2	2	2	2	39.7	15.0034	108	17.5	FALSE	FALSE	FALSE	FALSE	6.1	37.6	217	3.8	1.6	0.7	45.5	47	15	117	2	<LOD	2	2	2	0	0
7/24/12 12:00 AM	15	15-0211	1	15	3	2	2	2	2	39	18.5178	161	48	FALSE	FALSE	FALSE	FALSE	7.2	42.8	218	6	0.4	0.8	46.1	38	13	163	1	1		1	2	0	0
7/25/12 12:00 AM	15	15-0212	1	14	1	2	2	2	2	38.5	15.4006	155	37	FALSE	FALSE	FALSE	FALSE	10.2	42.2	255	8.7	0.7	0.8	46.3	46	16	184	2	<LOD	2	2	2	0	0
7/26/12 12:00 AM	15	15-0213	2	11	3	2	2	2	2	38	16.8475	156	41	FALSE	FALSE	FALSE	FALSE	8.8	36.9	213	6.4	1.6	0.6	44.3	35	12	72	2	<LOD	2	2	2	0	0
7/26/12 12:00 AM	15	15-0214	2	10	3	1	1	2	2	39.9	23.4694	140	46	FALSE	FALSE	FALSE	FALSE	3.9	36.2	243	3.3	0.5	0.1	41	38	33	111	2	<LOD	2	2	2	0	2
7/27/12 12:00 AM	15	15-0215	1	3	3	1	2	2	2	37.8	20.7612	85	15	FALSE	FALSE	FALSE	FALSE	9.92	38.3	248	7.39	2.05	0.018	46.8	46	14	101	2	<LOD	2	2	2	0	0
7/27/12 12:00 AM	15	15-0216	2	14	2	2	2	2	2	38	15.6956	145	33	FALSE	FALSE	FALSE	FALSE	3.2	44	174	2.41	0.772	0.004	46.3	39	16	72	1	2		1	1	2	1
7/31/12 12:00 AM	15	15-0217	2	12	2	1	2	2	2	37.5	14.3353	141	28.5	TRUE	FALSE	FALSE	FALSE	4.1	40	230	2	1.8	0.2	42.3	39	16	127	1	<LOD	2	2	1	2	1
7/31/12 12:00 AM	15	15-0218	2	9	3	1	2	2	2	39.1	12.7219	130	21.5	FALSE	FALSE	FALSE	FALSE	5.7	41.1	118	4.3	1	0.4	39.9	86	20	243	1	2		1	1	2	1
2012-01-08	15	15-0219	2	12	3	2	2	2	1	39	20.1348	156	49	FALSE	FALSE	FALSE	FALSE	3.3	40.5	160	2.2	0.8	0.3	43.2	33	11	98	1	4		2	1	2	1
2012-02-08	15	15-0220	1	7	2	2	1	2	2	38.5	13.2325	115	17.5	FALSE	FALSE	FALSE	FALSE	4.7	40.2	218	3.2	1	0.5	46.1	50	17	120	1	4		1	2	0	0
2012-02-08	15	15-0221	1	11	3	2	2	2	2	38.6	12.426	130	21	FALSE	FALSE	FALSE	FALSE	3.6	42	106	1.7	1.2	0.6	43.5	188	92	125	1	2		1	1	2	1
2012-03-08	15	15-0222	1	11	1	1	2	2	2	38	13.4431	135	24.5	FALSE	FALSE	FALSE	FALSE	9.5	40.3	243	7.5	0.6	1.4	44.1	39	16	66	1	2		2	2	0	0
2012-03-08	15	15-0223	1	14	2	1	2	2	2	38	13.2231	165	36	FALSE	FALSE	FALSE	FALSE	6.2	40	187	3.6	1.2	1.3	44.2	41	16	113	2	<LOD	2	2	2	0	0
2012-03-08	15	15-0224	1	8	3	2	2	2	2	37	22.3773	137	42	FALSE	FALSE	FALSE	FALSE	4	38.6	220	3	0.9	0.1	43.7	65	67	130	1	1		1	2	0	0
2012-03-08	15	15-0225	1	4	3	2	1	2	2	37.5	19.0476	105	21	FALSE	FALSE	FALSE	FALSE	3.5	43.2	157	1	2.1	0.3	42.9	111	36	2768	1	1		1	2	0	0
2012-03-08	15	15-0226	2	10	2	2	1	2	2	37.8	18.3495	142	37	FALSE	FALSE	FALSE	FALSE	3.7	36.2	187	2.4	0.8	0.5	46	34	30	97	1	2		1	1	2	1
2012-06-08	15	15-0227	1	7	2	1	2	2	2	37.5	14.6103	117	20	FALSE	FALSE	FALSE	FALSE	6.9	40.5	255	3.8	2.6	0.5	45.5	45	27	125	2	<LOD	2	2	2	0	0
2012-06-08	15	15-0228	1	12	3	2	2	2	2	37	16.429	134	29.5	FALSE	FALSE	FALSE	FALSE	3.5	37.7	238	2.5	0.6	0.4	42.5	52	37	94	1	4		2	2	0	0
2012-06-08	15	15-0229	2	11	3	2	2	1	2	38	14.5978	136	27	FALSE	FALSE	TRUE	FALSE	4	39.1	165	2.2	1.5	0.3	45.2	39	10	165	2	<LOD	3	2	2	0	2
2012-06-08	15	15-0230	2	9	3	2	2	2	2	37.2	16.225	129	27	FALSE	FALSE	FALSE	FALSE	11.5	38.2	274	8.8	1.9	0.8	44.7	60	24	97	2	<LOD	2	2	2	0	0
2012-07-08	15	15-0231	1	5	3	2	2	2	2	37	12.8601	108	15	FALSE	FALSE	TRUE	FALSE	6.49	35.9	225	1.67	4.01	0.525	44.7	35	11	76	2	<LOD	2	2	2	0	0
2012-07-08	15	15-0232	1	14	3	2	2	2	1	38	16.7969	160	43	FALSE	FALSE	TRUE	FALSE	2.49	39.4	121	1.43	0.667	0.296	42	33	13	196	1	4		1	1	1	2
2012-08-08	15	15-0233	1	8	1	2	2	2	2	38.3	15.9763	130	27	FALSE	FALSE	FALSE	FALSE	4.98	34.1	238	3.31	0.801	0.69	42.7	39	10	92	1	1		2	2	0	0
2012-08-08	15	15-0234	2	8	3	2	2	2	1	37.6	13.4171	119	19	FALSE	FALSE	FALSE	FALSE	2.72	39.1	178	1.62	0.846	0.231	43.1	41	10	125	1	2		1	2	0	0
2012-09-08	15	15-0235	1	13	3	1	1	1	1	37.5	30.7599	172	91	FALSE	FALSE	TRUE	FALSE	4.26	45.8	82	0.889	2.14	1.09	42.7	90	68	187	2	<LOD	2	2	2	0	1
2012-09-08	15	15-0236	2	11	2	2	2	2	2	37.8	19.025	145	40	FALSE	FALSE	FALSE	FALSE	3.2	40.1	205	1.8	1.1	0.3	42.3	49	21	70	1	2		1	2	0	0
2012-09-08	15	15-0237	2	8	3	2	2	2	2	38.5	15.9122	135	29	FALSE	FALSE	FALSE	FALSE	6.2	43	157	4.3	1.3	0.6	44	38	10	177	2	<LOD	2	2	2	0	2
2012-10-08	15	15-0238	1	9	3	1	1	2	2	37.5	16.4609	135	30	FALSE	FALSE	FALSE	FALSE	2.98	41	293	1.64	0.968	0.321	43.1	37	14	111	1	1		1	1	2	1
8/13/12 12:00 AM	15	15-0239	1	7	2	2	2	2	2	37	18.2102	124	28	FALSE	FALSE	FALSE	FALSE	9.6	42	187	7.6	1.2	0.8	44.3	56	40	88	1	2		1	1	2	1
8/13/12 12:00 AM	15	15-0240	2	5	3	1	2	2	2	37.5	13.7241	101	14	FALSE	FALSE	FALSE	FALSE	7.5	37.4	224	6.3	1	0.2	43.7	77	31	592	2	<LOD	2	2	2	0	0
8/13/12 12:00 AM	15	15-0241	1	15	3	2	2	2	1	38	26.3656	172	78	FALSE	FALSE	FALSE	FALSE	4.7	44.1	226	1.9	2.2	0.6	46.6	35	22	153	2	<LOD	2	2	2	0	0
8/13/12 12:00 AM	15	15-0242	2	11	3	2	2	2	1	38.5	18.5108	147	40	FALSE	FALSE	FALSE	FALSE	3.57	44.6	152	1.72	1.1	0.662	41.4	39	20	110	1	4		2	1	2	1
8/15/12 12:00 AM	15	15-0243	1	13	2	2	2	2	2	38	21.58	146	46	FALSE	FALSE	FALSE	FALSE	10.7	40.5	222	6.17	3.34	1.13	41.2	28	12	81	2	<LOD	2	2	2	0	2
8/15/12 12:00 AM	15	15-0244	1	9	3	2	2	2	1	38	23.1044	138	44	FALSE	FALSE	FALSE	FALSE	1.88	39	109	0.966	0.687	0.167	36	75	51	99	1	4		1	1	2	1
8/16/12 12:00 AM	15	15-0245	2	11	1	2	2	2	2	38.5	12.62	135	23	FALSE	FALSE	FALSE	FALSE	6.97	38.5	200	5.85	0.395	0.635	43.9	41	11	182	1	2		1	2	0	0
8/16/12 12:00 AM	15	15-0246	1	8	3	2	2	2	2	38.3	17.301	136	32	FALSE	FALSE	FALSE	FALSE	11.2	41.4	262	7.8	2.27	0.97	42.2	40	24	71	2	<LOD	2	2	2	0	0
8/17/12 12:00 AM	15	15-0247	1	7	2	2	2	2	2	37	17.0068	126	27	FALSE	FALSE	FALSE	FALSE	2.86	38	238	1.12	1.29	0.415	41.3	36	13	122	2	<LOD	2	2	2	0	0
8/20/12 12:00 AM	15	15-0248	1	15	3	2	2	1	1	38	14.7929	156	36	FALSE	FALSE	FALSE	TRUE	5	42.6	111	4.4	0.4	0.2	48.2	59	19	105	1	4		1	1	2	3
8/22/12 12:00 AM	15	15-0249	1	10	2	2	2	2	2	38.5	16.3658	142	33	FALSE	FALSE	FALSE	FALSE	5.3	42.9	223	3	1.2	1	42.2	42	13	77	2	<LOD	2	2	2	0	0
8/22/12 12:00 AM	15	15-0250	2	4	2	1	2	2	2	38	13.0208	96	12	FALSE	FALSE	FALSE	FALSE	3.8	36.8	287	1.6	1.7	0.4	41.6	95	17	126	2	<LOD	2	2	2	0	0
8/23/12 12:00 AM	15	15-0251	1	9	2	2	2	2	2	38	14.9584	124	23	FALSE	FALSE	FALSE	FALSE	2.9	38.3	184	2	0.7	0.2	38.6	62	23	357	1	1		2	2	0	0
8/23/12 12:00 AM	15	15-0252	2	5	3	2	2	2	2	37.8	14.1201	116	19	FALSE	FALSE	FALSE	FALSE	10.2	37.9	236	7.4	2	0.8	41.3	33	9	65	2	<LOD	2	2	2	0	0
8/24/12 12:00 AM	15	15-0253	1	15	3	2	2	2	2	39.5	18.4804	162	48.5	FALSE	FALSE	FALSE	FALSE	8.4	46.3	132	6.8	0.6	1	46.3	48	54	105	1	4		1	1	2	1
8/24/12 12:00 AM	15	15-0254	1	10	2	2	2	2	2	37.5	23.5308	132	41	FALSE	FALSE	FALSE	FALSE	3.95	41.2	246	1.34	2.28	0.281	41.7	44	17	178	2	<LOD	2	2	2	0	0
8/27/12 12:00 AM	15	15-0255	2	11	3	1	1	2	2	37	15.7778	150	35.5	FALSE	FALSE	FALSE	FALSE	2.3	37.6	181	1	1	0.3	39.8	50	10	115	1	4		2	1	2	1
8/27/12 12:00 AM	15	15-0256	2	8	3	2	1	2	2	38	15.1506	131	26	FALSE	FALSE	FALSE	TRUE	1.9	39	110	1.4	0.4	0.1	37.9	70	7	154	1	1		1	1	2	1
8/27/12 12:00 AM	15	15-0257	2	4	2	2	2	2	2	39.7	14	100	14	FALSE	FALSE	FALSE	FALSE	7.2	36.8	213	4.5	1.4	1.2	38.7	64	18	114	2	<LOD	2	2	2	0	0
8/27/12 12:00 AM	15	15-0258	1	11	2	2	2	2	2	38.6	16.8789	144	35	FALSE	FALSE	FALSE	FALSE	4.46	37.2	187	2.38	1.61	0.309	41.9	49	25	109	1	<LOD	1	1	2	0	0
8/27/12 12:00 AM	15	15-0259	1	9	3	2	2	2	2	37	19.84	127	32	FALSE	FALSE	FALSE	FALSE	7.4	36.3	229	5.8	1	0.6	40.5	37	16	94	2	<LOD	2	2	2	0	0
8/29/12 12:00 AM	15	15-0260	1	10	2	2	2	2	2	37.5	16.3966	144	34	FALSE	FALSE	FALSE	FALSE	5.4	39.8	228	3.3	1.35	0.66	40.7	47	22	125	1	4		2	2	0	0
8/29/12 12:00 AM	15	15-0261	2	12	2	2	2	2	2	39.9	16.2274	151	37	FALSE	FALSE	FALSE	FALSE	4.2	38.9	104	3.09	0.446	0.61	40.6	27	9	72	1	4		1	1	2	1
8/29/12 12:00 AM	15	15-0262	2	12	2	2	2	2	2	37.7	18.2961	146	39	FALSE	FALSE	FALSE	FALSE	3.7	37.8	174	2.2	1	0.5	41.3	56	54	151	1	4		1	1	2	1
8/30/12 12:00 AM	15	15-0263	2	10	3	2	2	2	2	38	13.7741	132	24	FALSE	FALSE	FALSE	FALSE	6.13	40.5	178	3.27	2.12	0.671	42.5	42	13	87	2	<LOD	2	2	2	0	0
8/30/12 12:00 AM	15	15-0264	1	5	3	2	2	2	1	39.4	21.172	115	28	FALSE	FALSE	FALSE	FALSE	2.8	38.6	172	1.4	1.2	0.2	37.6	108	85	86	1	4		1	1	2	1
8/30/12 12:00 AM	15	15-0265	1	12	1	2	2	2	2	38.9	17.8536	142	36	FALSE	FALSE	FALSE	FALSE	5.5	38	256	4.6	0.6	0.3	38.8	83	57	195	1	4		2	2	0	0
2012-04-09	15	15-0266	2	11	3	1	2	2	2	39	15.3502	151	35	FALSE	FALSE	FALSE	FALSE	3.11	38.8	131	2.06	0.591	0.406	41.4	41	13	59	1	4		1	2	0	0
2012-05-09	15	15-0267	2	12	3	2	2	2	2	38.5	20.8117	155	50	FALSE	FALSE	FALSE	FALSE	4.5	43.7	165	3	0.9	0.6	45.6	59	27	64	1	4		1	1	2	1
2012-06-09	15	15-0268	1	15	3	2	2	2	2	38.6	13.8444	159	35	FALSE	FALSE	FALSE	FALSE	2.34	40.5	71	1.28	0.689	0.314	41.5	45	16	61	1	4		1	1	2	1
2012-06-09	15	15-0269	2	13	3	1	2	2	2	37	18.2899	162	48	FALSE	FALSE	FALSE	FALSE	10.9	37.9	238	6.19	4.03	0.566	42.2	32	19	62	2	<LOD	2	2	2	0	2
2012-06-09	15	15-0270	2	9	2	2	2	2	2	38	21.6837	140	42.5	FALSE	FALSE	FALSE	FALSE	17.5	40.3	427	11.7	4.1	1.3	40.6	59	34	144	2	<LOD	2	2	2	0	0
2012-06-09	15	15-0271	1	13	3	2	1	1	2	37	15.5817	152	36	FALSE	FALSE	FALSE	FALSE	2.8	40.1	151	1.6	1	0.2	45.4	49	26	337	2	<LOD	2	2	2	0	2
2012-07-09	15	15-0272	1	10	3	1	1	2	2	39	14.8148	135	27	FALSE	FALSE	FALSE	FALSE	2.8	37.4	99	2.1	0.6	0.1	36	65	26	137	1	4		1	2	2	1
2012-10-09	15	15-0273	2	6	3	2	1	2	2	38.5	19.1327	112	24	FALSE	FALSE	FALSE	FALSE	5.1	42.3	233	2.9	1.9	0.3	45.9	45	8	98	2	<LOD	2	2	2	0	0
2012-11-09	15	15-0274	2	8	3	2	2	2	2	38	19.84	127	32	FALSE	FALSE	FALSE	FALSE	4.28	39.1	210	1.64	2.23	0.336	45.3	41	47	97	2	<LOD	2	2	2	0	2
2012-11-09	15	15-0275	1	12	3	1	2	2	2	39.6	18.5493	145	39	FALSE	FALSE	FALSE	FALSE	3.77	40	180	2.44	1.09	0.195	41.1	148	113	94	1	4		2	2	0	0
2012-12-09	15	15-0276	2	15	2	2	2	2	2	37	18.5108	147	40	FALSE	FALSE	FALSE	FALSE	3.4	39.6	177	2.2	0.7	0.5	44.5	36	10	119	1	4		1	2	0	0
2012-12-09	15	15-0277	1	13	1	2	2	2	2	39.5	18.3256	144	38	FALSE	FALSE	FALSE	FALSE	4.1	39.9	182	3.4	0.5	0.2	42.5	54	74	119	1	1		1	2	0	0
9/13/12 12:00 AM	15	15-0278	1	12	2	2	2	2	2	39.6	20.3428	152	47	FALSE	FALSE	FALSE	FALSE	6.71	40.5	173	5.24	0.682	0.699	46.9	55	20	108	1	3		1	2	0	0
9/13/12 12:00 AM	15	15-0279	2	6	2	2	2	2	2	38.8	14.1201	116	19	FALSE	FALSE	FALSE	FALSE	6.1	35.2	161	3.1	2.3	0.7	43	49	13	84	2	<LOD	2	2	2	0	0
9/17/12 12:00 AM	15	15-0280	2	7	3	2	1	2	2	37.8	15.9439	112	20	FALSE	FALSE	FALSE	FALSE	4.83	39.9	269	2.11	2.3	0.372	44.5	75	21	290	2	<LOD	2	2	2	0	0
9/17/12 12:00 AM	15	15-0281	1	12	3	2	2	2	2	38.5	17.9817	151	41	FALSE	FALSE	FALSE	FALSE	5.1	40	351	2.6	2	0.5	46.4	51	18	273	1	4		2	2	0	0
9/18/12 12:00 AM	15	15-0282	2	4	3	2	2	2	2	38	15.3046	99	15	FALSE	FALSE	FALSE	FALSE	5	38.5	159	2.3	2	0.6	44.5	61	16	106	2	<LOD	2	2	2	0	2
9/19/12 12:00 AM	15	15-0283	1	14	3	1	2	2	2	38.5	17.0656	155	41	FALSE	FALSE	FALSE	FALSE	3.5	44.4	232	2.1	1.1	0.3	44.2	42	24	532	1	4		1	2	0	0
9/20/12 12:00 AM	15	15-0284	2	14	3	2	1	2	2	38	18.4202	151	42	FALSE	FALSE	FALSE	FALSE	3.32	39.6	64	2.25	0.76	0.266	44.1	46	11	92	1	4		1	1	2	1
9/21/12 12:00 AM	15	15-0285	2	11	3	2	2	2	2	38.7	14.5408	140	28.5	FALSE	FALSE	FALSE	FALSE	3.38	40.1	80	2.14	0.765	0.448	44.9	118	36	120	1	4		2	1	2	2
9/24/12 12:00 AM	15	15-0286	2	8	3	2	2	2	2	38	14.3637	118	20	FALSE	FALSE	FALSE	FALSE	2.6	39.1	119	1.06	1.18	0.29	44.4	62	21	104	1	2		2	2	0	0
9/24/12 12:00 AM	15	15-0287	1	10	2	1	1	2	2	37	20.3018	135	37	FALSE	FALSE	FALSE	FALSE	4.9	43	282	2.1	2.3	0.5	42.8	43	13	109	2	<LOD	2	2	2	0	0
9/25/12 12:00 AM	15	15-0288	1	7	3	2	2	2	2	37.8	23.1344	123	35	FALSE	FALSE	FALSE	FALSE	5.35	39.5	204	2.75	1.73	0.796	41.4	79	63	101	1	4		1	1	2	1
9/28/12 12:00 AM	15	15-0289	2	8	3	2	2	2	2	37.5	13.5417	120	19.5	FALSE	FALSE	FALSE	FALSE	3.5	44.5	240	1.57	1.31	0.59	42	22	24	157	2	<LOD	2	2	2	0	0
2012-01-10	15	15-0290	1	7	3	2	2	2	2	38.1	23.9158	112	30	FALSE	FALSE	FALSE	FALSE	5.5	39.7	306	3.49	1.34	0.65	44.4	71	49	108	1	3		1	2	0	0
2012-01-10	15	15-0291	1	5	3	2	1	2	2	38	14.2399	106	16	FALSE	FALSE	FALSE	FALSE	5.4	38.2	254	2.2	2.9	0.3	43.4	64	15	150	2	<LOD	2	2	2	0	0
2012-04-10	15	15-0292	2	13	3	1	2	2	2	37.5	18.4911	156	45	FALSE	FALSE	FALSE	FALSE	4.2	43.9	164	1.4	1.9	0.8	43.6	44	39	147	1	<LOD	1	1	1	2	1
2012-04-10	15	15-0293	1	4	3	2	2	2	2	39.7	15.9722	120	23	FALSE	FALSE	FALSE	FALSE	11.6	32.9	274	7.9	2.8	0.8	41.6	57	14	671	2	<LOD	2	2	2	0	0
2012-05-10	15	15-0294	2	7	3	1	1	2	2	39	14.1091	122	21	FALSE	FALSE	FALSE	FALSE	3.5	35.4	127	2.4	0.9	0.2	45.6	70	18	123	2	<LOD	2	2	2	0	2
2012-08-10	15	15-0295	2	4	3	2	2	2	2	37	12.7538	99	12.5	FALSE	FALSE	FALSE	FALSE	10.8	35.5	340	6.2	3.4	1	43.5	38	13	60	1	<LOD	2	2	1	2	1
2012-08-10	15	15-0296	1	5	3	2	2	2	2	38	13.6054	105	15	FALSE	FALSE	FALSE	FALSE	8	35.9	311	4.2	2.9	0.7	40.3	66	16	185	2	<LOD	2	2	2	0	0
2012-08-10	15	15-0297	2	7	1	2	2	2	2	37.7	13.8806	123	21	FALSE	FALSE	FALSE	FALSE	5.6	35	249	3.6	1.5	0.5	41.3	41	19	168	2	<LOD	2	2	2	0	0
2012-10-10	15	15-0298	1	9	3	1	2	2	2	38.7	12.8174	128	21	FALSE	FALSE	FALSE	FALSE	3.2	41.2	202	2.1	0.9	0.2	46.4	55	15	136	2	<LOD	2	2	2	0	2
2012-11-10	15	15-0299	1	3	3	2	2	2	2	38	15.0306	93	13	FALSE	FALSE	FALSE	FALSE	4.3	32.8	199	2.04	1.77	0.4	38.1	48	7	101	2	<LOD	2	2	2	0	0
2012-11-10	15	15-0300	1	9	2	2	2	2	2	38.2	16.4795	128	27	FALSE	FALSE	FALSE	FALSE	6.7	41	238	3.8	1.9	0.9	41.9	50	22	106	2	<LOD	2	2	2	0	0
10/16/12 12:00 AM	15	15-0301	2	7	3	2	1	2	2	38.2	14.3637	118	20	FALSE	FALSE	FALSE	FALSE	4	36.3	174	2.4	1.3	0.3	42.7	65	11	110	2	<LOD	2	2	2	0	2
10/18/12 12:00 AM	15	15-0302	1	4	3	2	2	2	2	39.2	14.5	100	14.5	FALSE	FALSE	FALSE	FALSE	11	36.1	347	7.2	2.7	1	46.4	25	17	113	2	<LOD	2	2	2	0	2
10/19/12 12:00 AM	15	15-0303	1	7	3	1	2	2	2	38.5	16.3923	121	24	FALSE	FALSE	FALSE	FALSE	3.8	37.1	221	2.1	1.4	0.3	43.4	41	9	126	2	<LOD	2	2	2	0	0
10/22/12 12:00 AM	15	15-0304	2	9	3	1	2	2	2	37	14.08	125	22	FALSE	FALSE	FALSE	FALSE	4.5	39.1	237	2.3	1.6	0.5	45.3	45	19	77	2	<LOD	2	2	2	0	0
10/22/12 12:00 AM	15	15-0305	1	3	2	1	2	2	2	37.5	16.3249	99	16	FALSE	FALSE	FALSE	FALSE	8.7	39.5	257	3.8	3.5	1	40.9	51	16	139	2	<LOD	2	2	2	0	0
10/23/12 12:00 AM	15	15-0306	2	15	3	2	2	2	2	38.2	21.3675	156	52	FALSE	FALSE	FALSE	FALSE	3.6	40.8	173	2.2	0.6	0.7	43.7	35	16	81	1	4		1	1	2	1
10/24/12 12:00 AM	15	15-0307	1	10	3	2	2	2	2	37	15.451	137	29	FALSE	FALSE	FALSE	FALSE	6.2	34.3	300	3.2	2.2	0.7	40.8	54	27	128	2	<LOD	2	2	2	0	0
10/25/12 12:00 AM	15	15-0308	2	7	3	1	2	2	1	38	13.9887	115	18.5	FALSE	FALSE	FALSE	FALSE	2.9	37.2	121	0.7	1.9	0.3	43.5	71	17	112	1	<LOD	2	2	1	2	1
10/26/12 12:00 AM	15	15-0309	1	13	3	2	2	2	2	39.7	16.937	163	45	TRUE	FALSE	FALSE	FALSE	4.5	36.2	208	3.6	0.6	0.3	39.5	32	5	238	2	<LOD	2	2	2	0	0
10/26/12 12:00 AM	15	15-0310	2	10	3	2	2	2	2	38.6	18.1077	141	36	FALSE	FALSE	FALSE	FALSE	5.8	39.6	262	3.77	1.16	0.84	48.5	31	6	145	2	<LOD	2	2	2	0	0
10/29/12 12:00 AM	15	15-0311	2	5	2	1	2	2	2	37.9	14.8633	116	20	FALSE	FALSE	FALSE	FALSE	14.2	37.6	290	11.5	2.1	0.6	38.6	53	19	81	2	<LOD	2	2	2	0	0
10/30/12 12:00 AM	15	15-0312	1	15	3	2	2	2	2	39.8	19.052	162	50	FALSE	FALSE	FALSE	FALSE	3.3	43.7	110	2.4	0.6	0.3	39.8	51	24	144	1	4		1	1	1	2
10/30/12 12:00 AM	15	15-0313	1	8	3	2	2	2	2	37	13.2196	123	20	FALSE	FALSE	FALSE	FALSE	3.5	38.8	160	1.01	1.61	0.72	42.5	69	18	213	2	<LOD	2	2	2	0	0
10/30/12 12:00 AM	15	15-0314	1	6	3	2	2	2	2	37.5	13.1944	120	19	FALSE	FALSE	FALSE	FALSE	3.5	36.5	187	1.9	1.3	0.3	44	50	8	97	2	<LOD	2	2	2	0	0
10/31/12 12:00 AM	15	15-0315	1	7	1	1	2	2	2	38.5	14.781	122	22	FALSE	FALSE	FALSE	FALSE	25.5	39.8	354	23.2	1.5	0.5	44.7	56	10	130	2	<LOD	2	2	2	0	0
10/31/12 12:00 AM	15	15-0316	1	14	3	2	2	2	2	38	18.1787	152	42	FALSE	FALSE	FALSE	FALSE	4	42.3	155	2.6	1.2	0.2	42.9	50	11	1213	2	<LOD	2	2	2	0	2
2012-01-11	15	15-0317	1	15	3	2	2	2	2	38.5	15.2288	159	38.5	FALSE	FALSE	FALSE	FALSE	2.7	42.7	170	1.7	0.7	0.3	45.3	42	10	118	1	4		2	2	0	0
2012-01-11	15	15-0318	1	13	3	1	2	2	2	38.3	18.8189	163	50	FALSE	FALSE	FALSE	FALSE	1.9	41.2	114	1.1	0.6	0.2	42.6	71	23	138	1	4		1	2	2	1
2012-05-11	15	15-0319	2	4	3	1	2	2	2	37	16.2324	111	20	FALSE	FALSE	FALSE	FALSE	3.6	39.1	214	2.1	1.2	0.3	46	66	16	288	2	<LOD	2	2	2	0	0
2012-06-11	15	15-0320	2	6	3	2	2	2	2	38	15.2778	120	22	FALSE	FALSE	FALSE	FALSE	5.3	40.5	261	2.7	2.1	0.4	42	47	21	135	2	<LOD	2	2	2	0	0
2012-06-11	15	15-0321	2	4	3	2	2	2	2	38.5	14.7929	104	16	FALSE	FALSE	FALSE	FALSE	4.2	36.6	112	2.5	1.3	0.4	46.2	50	33	73	2	<LOD	2	2	2	0	2
2012-12-11	15	15-0322	2	4	3	2	1	2	2	39.9	14.8981	102	15.5	FALSE	FALSE	FALSE	FALSE	9.4	32.4	235	6.8	1.4	1.1	40.3	42	20	64	2	<LOD	2	2	2	0	0
11/13/12 12:00 AM	15	15-0323	1	6	3	1	1	2	2	39.9	14.3667	115	19	FALSE	FALSE	FALSE	FALSE	6.6	37.9	348	4.5	1.4	0.7	43.4	41	11	149	2	<LOD	2	2	2	0	0
11/14/12 12:00 AM	15	15-0324	2	7	3	1	1	2	2	38	15.8636	123	24	FALSE	FALSE	FALSE	FALSE	2.2	44.4	148	1.11	0.81	0.21	40.9	51	16	98	1	4		1	2	2	1
11/16/12 12:00 AM	15	15-0325	2	14	3	2	2	2	2	38.2	18.132	161	47	FALSE	FALSE	FALSE	FALSE	5.9	42.1	185	5.1	0.6	0.2	45.3	30	14	91	2	<LOD	2	2	2	0	0
11/20/12 12:00 AM	15	15-0326	1	15	3	2	2	2	2	38.5	20.3244	163	54	FALSE	FALSE	FALSE	FALSE	2.9	46.4	117	1.5	1.2	0.2	45.3	67	17	140	1	2		1	2	2	1
11/20/12 12:00 AM	15	15-0327	1	12	3	2	2	2	2	38.5	19.3878	140	38	FALSE	FALSE	FALSE	FALSE	7.1	38.9	218	5.7	1	0.2	47.8	51	45	125	2	<LOD	2	2	2	0	0
11/23/12 12:00 AM	15	15-0328	2	9	2	2	2	2	2	38	14.4222	129	24	FALSE	FALSE	FALSE	FALSE	4.7	38.6	222	2.6	1.7	0.4	41.9	49	21	57	2	<LOD	2	2	2	0	0
11/27/12 12:00 AM	15	15-0329	1	14	3	2	2	2	2	37.5	16.0229	154	38	FALSE	FALSE	FALSE	FALSE	3.7	39.7	244	1.4	1.4	0.7	46.4	44	11	154	2	<LOD	2	2	2	0	0
11/28/12 12:00 AM	15	15-0330	1	4	3	2	2	2	2	38.5	15.4195	105	17	FALSE	FALSE	FALSE	FALSE	6.9	37.3	262	5.1	1.3	0.5	44.8	68	21	118	2	<LOD	2	2	2	0	0
11/28/12 12:00 AM	15	15-0331	2	9	3	2	2	2	2	38	16.5988	141	33	FALSE	FALSE	FALSE	FALSE	5.5	37.6	213	3.9	0.8	0.8	49	47	20	74	2	<LOD	2	2	2	0	0
11/29/12 12:00 AM	15	15-0332	2	5	3	2	2	2	2	37.5	14.2399	106	16	FALSE	FALSE	FALSE	FALSE	3.3	40.9	166	1.25	1.58	0.42	39.7	75	37	198	2	<LOD	2	2	2	0	0
2012-04-12	15	15-0333	2	10	1	2	1	2	2	38.6	18.3785	138	35	FALSE	FALSE	FALSE	FALSE	7.2	38.8	201	6.4	0.5	0.3	48	40	20	298	1	4		1	2	0	0
2012-04-12	15	15-0334	1	7	3	2	2	2	2	38	15.2778	120	22	FALSE	FALSE	FALSE	FALSE	13.2	37.2	220	11.1	1.3	0.8	42.5	41	14	102	2	<LOD	2	2	2	0	0
2012-04-12	15	15-0335	1	7	3	2	2	2	2	37.5	19.1244	121	28	FALSE	FALSE	FALSE	FALSE	12.6	35.8	441	7.8	3.1	1.6	39.5	34	15	31	2	<LOD	2	2	2	0	0
2012-04-12	15	15-0336	1	4	3	2	2	2	2	38.8	15.3787	102	16	FALSE	FALSE	FALSE	FALSE	7.2	40.7	260	5.1	1.3	0.8	45	75	50	104	2	<LOD	2	2	2	0	0
2012-10-12	15	15-0337	2	6	3	2	2	2	2	38	15.3408	117	21	FALSE	FALSE	FALSE	FALSE	6.5	36.6	388	2.75	2.86	0.81	45.5	55	22	80	2	<LOD	2	2	2	0	2
2012-10-12	15	15-0338	2	14	2	1	2	2	2	38.4	15.0311	159	38	FALSE	FALSE	FALSE	FALSE	6.4	40.6	164	2.65	2.78	0.94	47.8	94	49	76	1	4		1	2	2	1
2012-11-12	15	15-0339	2	12	1	1	2	2	2	38.7	20.5049	153	48	FALSE	FALSE	FALSE	FALSE	8.4	41.7	296	7.1	0.8	0.5	47.3	47	40	78	1	4		1	2	0	0
2012-12-12	15	15-0340	2	8	2	2	2	2	2	37.9	21.0856	136	39	FALSE	FALSE	FALSE	FALSE	5.7	40.3	266	4.1	0.9	0.7	47.7	30	9	135	1	2		1	2	2	1
2/13/12 12:00 AM	16	16-0001	2	4	1	2	2	2	2	38.7	12.1528	120	17.5	FALSE	FALSE	FALSE	FALSE	5.95	38.4	197	4	1.3	0.559	46.1	46	16	127	2	<LOD	2	2	2	0	0
2/13/12 12:00 AM	16	16-0002	1	6	1	2	2	2	2	38	14.8485	107	17	FALSE	FALSE	FALSE	FALSE	16.2	40.4	173	12.5	2.3	1.01	44.1	142	52	159	2	<LOD	2	2	2	0	0
2/13/12 12:00 AM	16	16-0003	2	3	1	2	2	2	2	38.5	16.9062	91	14	FALSE	FALSE	FALSE	FALSE	16.3	35.5	179	14.2	1.08	0.885	43.1	79	26	147	2	<LOD	2	2	2	0	0
2/13/12 12:00 AM	16	16-0004	2	3	1	2	2	2	2	38.3	14.4044	95	13	FALSE	FALSE	FALSE	FALSE	11.8	35.9	221	7.1	3.4	1.05	40.5	47	10	94	2	<LOD	2	2	2	0	0
2/13/12 12:00 AM	16	16-0006	1	5	3	2	2	2	2	38.2	19.0083	110	23	FALSE	FALSE	FALSE	FALSE	12.7	38.3	205	8.67	2.43	1.26	44.4	38	15	74	2	<LOD	2	2	2	0	0
2/13/12 12:00 AM	16	16-0007	1	11	3	2	2	2	2	38	13.3333	150	30	FALSE	FALSE	FALSE	FALSE	12.8	40.5	270	9.89	1.93	0.878	49.5	37	15	92	2	<LOD	2	2	2	0	0
2/13/12 12:00 AM	16	16-0009	1	2	1	2	2	2	2	39	13.8408	85	10	FALSE	FALSE	FALSE	FALSE	9.24	35.6	207	5.29	2.85	0.895	45.5	47	15	116	2	<LOD	2	2	2	0	0
2/14/12 12:00 AM	16	16-0010	2	5	2	2	2	2	2	38.2	15.7219	107	18	FALSE	FALSE	FALSE	FALSE	10.9	34.6	319	6.63	3.17	0.972	49.9	35	12	86	2	<LOD	2	2	2	0	0
2/14/12 12:00 AM	16	16-0011	1	8	2	1	2	2	2	37.2	18.6557	135	34	FALSE	FALSE	FALSE	FALSE	15.1	39.8	343	11.2	2.78	1.08	44.8	43	19	72	2	<LOD	2	2	2	0	0
2/15/12 12:00 AM	16	16-0012	1	3	1	2	2	2	2	37.7	15.917	85	11.5	FALSE	FALSE	FALSE	FALSE	23	40	427	18.1	3.26	1.33	51.4	42	22	80	2	<LOD	2	2	2	0	0
2/15/12 12:00 AM	16	16-0013	2	4	2	2	2	2	2	38	14.491	91	12	FALSE	FALSE	FALSE	FALSE	12.2	37.1	266	8.62	2.06	1.25	45.8	38	12	78	2	<LOD	2	2	2	0	0
2/15/12 12:00 AM	16	16-0014	2	4	2	1	1	2	2	37.3	16.0494	90	13	FALSE	FALSE	FALSE	FALSE	14.4	37	300	8.27	4.34	1.42	43.9	44	10	99	2	<LOD	2	2	2	0	0
2/15/12 12:00 AM	16	16-0015	2	7	1	2	2	2	2	39.3	14.5125	105	16	FALSE	FALSE	FALSE	FALSE	11.1	37.8	237	8.56	1.19	1.26	47.1	38	10	102	2	<LOD	2	2	2	0	0
2/16/12 12:00 AM	16	16-0016	2	3	1	2	2	2	2	39	15.1496	89	12	FALSE	FALSE	FALSE	FALSE	10.6	34.5	83	6.49	2.48	1.53	46.8	34	10	73	2	<LOD	2	2	2	0	2
2/16/12 12:00 AM	16	16-0017	1	2	2	2	2	2	2	38.4	20.7612	85	15	FALSE	FALSE	FALSE	FALSE	2.61	34.4	210	0.663	1.46	0.457	46.6	52	27	236	2	<LOD	2	2	2	0	0
2/16/12 12:00 AM	16	16-0018	1	2	2	2	2	2	2	38	16.4354	74	9	FALSE	FALSE	FALSE	FALSE	10.1	32.3	234	4.07	3.53	2.28	43.1	47	16	147	2	<LOD	2	2	2	0	0
2/16/12 12:00 AM	16	16-0019	2	3	1	2	2	2	2	37.8	15.4959	88	12	FALSE	FALSE	FALSE	FALSE	14.3	40.9	322	10.3	3.26	0.672	46.2	44	14	129	2	<LOD	2	2	2	0	0
2/17/12 12:00 AM	16	16-0020	1	2	3	2	2	2	2	37.5	15.1796	77	9	FALSE	FALSE	FALSE	FALSE	19.1	35	227	12.8	4.31	1.84	44.1	40	17	86	2	<LOD	2	2	2	0	0
2/17/12 12:00 AM	16	16-0021	2	4	2	1	2	1	2	38	13.234	101	13.5	FALSE	FALSE	FALSE	FALSE	13	39.1	216	10.1	1.97	0.861	44.7	39	15	81	2	<LOD	2	2	2	0	0
2/20/12 12:00 AM	16	16-0022	1	9	2	2	2	2	2	39.1	15.1597	143	31	FALSE	FALSE	FALSE	FALSE	14.9	37.5	269	12.3	1.37	1.18	47.9	28	11	69	2	<LOD	2	2	2	0	0
2/20/12 12:00 AM	16	16-0023	1	9	1	1	2	2	2	40.7	13.2275	126	21	FALSE	FALSE	FALSE	FALSE	11.2	34.3	127	8.95	1.06	1.11	45.9	38	14	200	2	<LOD	2	2	2	0	2
2/21/12 12:00 AM	16	16-0024	1	9	3	2	2	2	2	38.8	14.7929	130	25	FALSE	FALSE	FALSE	FALSE	11.8	36.9	310	7.77	2.5	1.07	43.2	22	11	71	2	<LOD	2	2	2	0	0
2/21/12 12:00 AM	16	16-0025	1	2	2	2	2	2	2	38.5	18.424	84	13	FALSE	FALSE	FALSE	FALSE	6.84	36	215	2.97	3.41	0.383	46	51	12	112	2	<LOD	2	2	2	0	0
2/21/12 12:00 AM	16	16-0026	1	3	1	2	2	2	2	38.3	15.6986	91	13	FALSE	FALSE	FALSE	FALSE	5.81	32.7	220	2.08	2.63	0.906	46.6	56	28	101	2	<LOD	2	2	2	0	0
2/22/12 12:00 AM	16	16-0027	2	5	3	2	2	2	2	39	12.9273	118	18	FALSE	FALSE	FALSE	FALSE	15	37.7	278	9.29	4.49	0.785	42.6	73	48	95	2	<LOD	2	2	2	0	0
2/22/12 12:00 AM	16	16-0028	1	7	1	2	2	2	2	38.5	19.4195	119	27.5	FALSE	FALSE	FALSE	FALSE	11.1	36.6	215	8.53	1.45	0.927	48.2	36	16	116	2	<LOD	2	2	2	0	0
2/23/12 12:00 AM	16	16-0029	1	3	2	2	2	2	2	38.2	15.8443	94	14	FALSE	FALSE	FALSE	FALSE	18.9	37.3	442	9.88	5.63	3.2	43.4	51	21	123	2	<LOD	2	2	2	0	2
2/23/12 12:00 AM	16	16-0030	2	3	1	2	2	2	2	37.5	15.0948	91	12.5	FALSE	FALSE	FALSE	FALSE	15.2	36.1	290	8.03	4.95	2.2	47.7	35	11	237	2	<LOD	2	2	2	0	0
2/23/12 12:00 AM	16	16-0031	1	5	3	1	2	2	2	40.5	14.5773	98	14	FALSE	FALSE	FALSE	FALSE	11	37.4	271	4.63	4.63	1.62	49.8	37	13	61	2	<LOD	2	2	2	0	0
2/23/12 12:00 AM	16	16-0032	2	3	1	1	2	2	2	38.2	12.4491	94	11	FALSE	FALSE	FALSE	FALSE	13.2	39.5	299	8.97	2.79	1.38	44.9	54	11	167	2	<LOD	2	2	2	0	0
2/24/12 12:00 AM	16	16-0033	1	2	2	2	2	2	2	38.2	15.1796	77	9	FALSE	FALSE	FALSE	FALSE	14.3	35.6	234	6.81	5.28	2.09	45.7	42	11	150	2	<LOD	2	2	2	0	0
2/27/12 12:00 AM	16	16-0034	2	3	1	2	2	2	2	39.7	17.0433	89	13.5	FALSE	FALSE	FALSE	FALSE	23.2	37.9	407	19.1	3.01	1.08	42.6	46	21	46	2	<LOD	2	2	2	0	0
2/27/12 12:00 AM	16	16-0035	1	3	1	2	2	2	2	37.5	18.937	89	15	FALSE	FALSE	FALSE	FALSE	10	36.9	182	5.68	2.43	1.68	41	46	20	109	2	<LOD	2	2	2	0	0
2/27/12 12:00 AM	16	16-0036	1	3	1	1	2	2	2	39.2	13.5802	90	11	FALSE	FALSE	FALSE	FALSE	7.06	32.9	143	4.69	1.28	1.05	41.9	47	22	135	2	<LOD	2	2	2	0	2
2/27/12 12:00 AM	16	16-0037	1	4	2	2	2	2	2	38.8	11.3422	115	15	FALSE	FALSE	FALSE	FALSE	11.5	31.9	286	7.53	2.56	1.27	42.4	43	16	63	2	<LOD	2	2	2	0	0
2/27/12 12:00 AM	16	16-0038	1	4	3	2	2	2	2	39	14.5773	98	14	FALSE	FALSE	FALSE	FALSE	10.3	36.1	239	4.87	2.92	2.06	40.4	48	20	183	2	<LOD	2	2	2	0	0
2/28/12 12:00 AM	16	16-0039	2	5	1	2	2	2	2	38	20.5862	101	21	FALSE	FALSE	FALSE	FALSE	9.09	35.5	280	5.01	2.69	1.33	42.8	37	15	67	2	<LOD	2	2	2	0	0
2/28/12 12:00 AM	16	16-0040	2	3	1	2	2	2	2	39.3	14.2045	88	11	FALSE	FALSE	FALSE	FALSE	12.9	37.5	198	7.33	3.92	1.49	44.9	41	11	93	2	<LOD	2	2	2	0	0
2/29/12 12:00 AM	16	16-0041	2	2	2	1	2	2	2	38.5	17.9851	81	11.8	FALSE	FALSE	FALSE	FALSE	5.6	39.1	195	2.05	2.19	1.31	45.6	56	16	151	2	<LOD	2	2	2	0	0
2012-01-03	16	16-0042	1	2	2	2	2	2	2	39	15.532	83	10.7	FALSE	FALSE	FALSE	FALSE	6.64	34.7	174	3.66	2.27	0.664	41.8	36	21	145	2	<LOD	2	2	2	0	0
2012-01-03	16	16-0043	1	2	1	2	2	2	2	40	18.424	84	13	FALSE	FALSE	FALSE	FALSE	31.6	39.1	293	21.7	5.78	4.03	42.2	30	67	39	2	<LOD	2	2	2	0	2
2012-01-03	16	16-0044	1	6	2	2	1	2	2	37.5	10.4043	116	14	FALSE	FALSE	FALSE	FALSE	11.4	36.4	489	6.38	3.15	1.59	44.2	26	11	70	2	<LOD	2	2	2	0	0
2012-02-03	16	16-0045	1	3	2	2	2	2	2	37.5	17.6745	89	14	FALSE	FALSE	FALSE	FALSE	11.5	33.8	207	5.65	4.22	1.34	40.3	45	13	95	2	<LOD	2	2	2	0	2
2012-02-03	16	16-0046	2	2	3	2	2	2	2	37.5	19.3337	82	13	FALSE	FALSE	FALSE	FALSE	11.4	37	240	4.33	5.65	1.18	45.1	37	22	129	2	<LOD	2	2	2	0	0
2012-02-03	16	16-0047	1	2	3	2	2	2	2	39	15.8541	87	12	FALSE	FALSE	FALSE	FALSE	5.53	37	118	3.8	1.43	0.296	46.8	61	24	176	2	<LOD	2	2	2	0	0
2012-05-03	16	16-0048	1	10	3	2	2	2	2	38.7	16.8032	138	32	FALSE	FALSE	FALSE	FALSE	3.44	38.2	165	2	0.89	0.493	44	59	44	84	1	<LOD	1	1	1	2	1
2012-05-03	16	16-0049	2	13	1	2	2	2	2	40.5	16.8889	150	38	FALSE	FALSE	FALSE	FALSE	4.87	37.9	215	2.94	1.16	0.746	47.2	33	11	63	1	<LOD	1	1	1	2	2
2012-05-03	16	16-0050	2	12	3	2	2	2	2	39	22.7694	154	54	FALSE	FALSE	FALSE	FALSE	9.78	37.1	237	6.85	1.8	1	42.8	29	27	258	2	<LOD	2	2	2	0	0
2012-06-03	16	16-0051	1	3	3	2	2	2	2	37.5	19.8053	94	17.5	FALSE	FALSE	FALSE	FALSE	11.9	37.1	321	4.04	6.19	1.5	43.6	37	10	76	2	<LOD	2	2	2	0	0
2012-06-03	16	16-0052	1	9	2	2	2	2	2	39	14.6484	128	24	FALSE	FALSE	FALSE	FALSE	7.4	37.1	259	4.28	2	1.1	45.7	37	13	102	2	<LOD	2	2	2	0	0
2012-06-03	16	16-0053	1	11	2	2	2	2	2	39	12.5976	126	20	TRUE	FALSE	FALSE	FALSE	3.53	37.4	126	2.18	0.748	0.577	44.1	50	25	118	1	1		1	1	1	1
2012-08-03	16	16-0054	2	3	3	2	2	2	2	39.5	17.7285	95	16	FALSE	FALSE	FALSE	FALSE	11.8	32.3	330	4.82	5.5	1.27	45.3	37	11	73	2	<LOD	2	2	2	0	0
2012-08-03	16	16-0055	2	4	2	2	2	1	2	37.5	17.1552	101	17.5	FALSE	FALSE	FALSE	FALSE	20.5	36.1	318	13.2	4.39	2.49	42.4	67	27	87	2	<LOD	2	2	2	0	0
2012-09-03	16	16-0056	1	4	2	1	2	2	2	39.5	17.6453	101	18	TRUE	FALSE	FALSE	FALSE	9.42	35.3	251	5.72	2.26	1.29	47.2	58	20	91	1	3		1	1	1	1
2012-09-03	16	16-0057	2	3	1	2	2	2	2	38	17.284	90	14	FALSE	FALSE	FALSE	FALSE	21.4	38.3	337	17.2	2.24	1.68	44.6	55	22	158	2	<LOD	2	2	2	0	0
2012-12-03	16	16-0058	1	4	1	2	2	2	2	38	14.7125	94	13	FALSE	FALSE	FALSE	FALSE	16.8	33.8	371	13.4	1.55	1.55	44.7	61	19	104	2	<LOD	2	2	2	0	0
2012-12-03	16	16-0059	2	3	1	2	2	2	2	39.2	13.5208	86	10	FALSE	FALSE	FALSE	FALSE	8.62	33.6	220	4.3	2.81	1.11	41.6	32	10	50	2	<LOD	2	2	2	0	0
3/13/12 12:00 AM	16	16-0060	1	2	1	2	2	2	2	38.5	14.1723	84	10	FALSE	FALSE	FALSE	FALSE	7.49	34.6	247	4.52	1.6	1.17	37.7	48	15	103	2	<LOD	2	2	2	0	0
3/13/12 12:00 AM	16	16-0061	1	8	1	1	2	2	2	38	16.3265	105	18	FALSE	FALSE	FALSE	FALSE	8.76	38.7	283	4.32	3.26	0.842	44.6	36	16	137	2	<LOD	2	2	2	0	0
3/13/12 12:00 AM	16	16-0062	2	6	1	2	2	2	2	37.5	16.5953	107	19	FALSE	FALSE	FALSE	FALSE	14.5	38.8	350	8.52	3.9	1.14	44.9	41	15	92	2	<LOD	2	2	2	0	0
3/13/12 12:00 AM	16	16-0063	2	10	1	2	2	2	2	39.5	14.5868	141	29	FALSE	FALSE	FALSE	FALSE	5.97	40.2	218	3.43	1.54	0.809	47.5	48	16	80	2	<LOD	2	2	2	0	0
3/13/12 12:00 AM	16	16-0064	1	7	2	2	2	2	2	37.8	10.2452	121	15	FALSE	FALSE	FALSE	FALSE	3.61	37.3	195	1.96	1.18	0.402	40.2	47	13	96	1	3		1	2	0	0
3/15/12 12:00 AM	16	16-0065	2	5	2	2	2	2	2	38	13.7241	101	14	FALSE	FALSE	FALSE	FALSE	11.7	33.8	285	7.67	2.17	1.59	44.1	34	12	70	2	<LOD	2	2	2	0	0
3/19/12 12:00 AM	16	16-0066	2	5	1	2	2	2	2	38.5	17.0441	111	21	FALSE	FALSE	FALSE	FALSE	9.28	36.4	203	6.37	1.95	0.892	46.4	48	23	138	2	<LOD	2	2	2	0	2
3/19/12 12:00 AM	16	16-0067	1	10	2	1	2	2	2	39.5	18.56	125	29	FALSE	FALSE	FALSE	FALSE	9.57	37.2	184	5.86	2.17	1.5	41.2	53	52	55	2	<LOD	2	2	2	0	0
3/19/12 12:00 AM	16	16-0068	1	4	2	2	2	1	2	37.5	14.7944	99	14.5	FALSE	FALSE	FALSE	FALSE	8.99	33.2	236	5.24	2.66	0.952	42.6	37	14	138	2	<LOD	2	2	2	0	0
3/19/12 12:00 AM	16	16-0069	2	6	2	2	2	2	2	38	17.3611	120	25	FALSE	FALSE	FALSE	FALSE	9.4	37.4	133	7.22	1.36	0.759	45	33	16	71	2	<LOD	2	2	2	0	0
[truncated: 3,727 more rows]

## Sheet: dictionary
Sex
1	Male
2	Female
DayDisease	Day of illness at enrollment
Vomiting
1	Yes
2	No
Abdo	Abdominal pain
1	yes
2	no
Muco	Mucosal bleeding
1	yes
2	no
Skin	Skin bleeding
1	yes
2	no
Lab_Confirmed_Dengue	Laboratory-confirmed dengue
1	yes
2	no
NS1_TRIP	NS1 rapid test
1	Positive
2	Negative
Serology
0	inclusive (either no paired sample available or serology result was inconclusive)
1	primary infection
2	secondary infection
Pairedsample	Paired sample available
1	yes
0	no
